# Supplementary material for: Gut microbiome and reproductive endocrine diseases: a Mendelian randomization study
Source: Front Endocrinol (Lausanne). 2023 Aug 4;14:1164186. doi: 10.3389/fendo.2023.1164186 (PMC10436605; doi:10.3389/fendo.2023.1164186)
Supplement: Supplementary file 2 [file Table_1.xlsx]

## Sheet: Supplementary Table 1A
Supplementary Table 1A. Main information of instrumental variables for PCOS used in MR analyses(P<1e-5)
Trait(outcome)	Bacterial genera（exposure）	SNP	Effect allele	Other allele	Exposure			Outcome			R2	F-statistics
					Beta	SE	P-value	Beta	SE	P-value
PCOS	Streptococcus	rs11110281	T	C	-0.137519	0.0227398	2.58e-09	-0.093	0.062	0.14	0.00241296	36.5673
PCOS	Streptococcus	rs72739637	A	G	0.0959942	0.0193213	1.03e-06	-0.011	0.051	0.83	0.0016517	24.6809
PCOS	Streptococcus	rs11764382	A	G	-0.0695345	0.0143671	1.29e-06	-0.022	0.041	0.59	0.00142738	23.4211
PCOS	Streptococcus	rs1918540	G	A	0.059639	0.0128148	2.44e-06	0.031	0.037	0.41	0.0013211	21.6563
PCOS	Streptococcus	rs7916711	A	G	0.102891	0.0217362	2.72e-06	0.13	0.062	0.033	0.00146295	22.4042
PCOS	Streptococcus	rs17708276	A	G	-0.0793955	0.0170628	3.04e-06	-0.0068	0.048	0.89	0.00132836	21.6491
PCOS	Streptococcus	rs10448310	A	G	-0.0517935	0.0111324	3.31e-06	-0.031	0.031	0.32	0.00131942	21.6433
PCOS	Streptococcus	rs11720390	G	A	0.107024	0.0228121	3.59e-06	0.038	0.066	0.57	0.00144407	22.0076
PCOS	Streptococcus	rs4968759	A	G	-0.0515109	0.0112068	3.78e-06	0.0086	0.031	0.78	0.00128781	21.1242
PCOS	Streptococcus	rs9903102	C	A	-0.0709483	0.0155275	4.18e-06	0.025	0.046	0.59	0.00127265	20.8751
PCOS	Streptococcus	rs6806351	T	C	-0.0633829	0.0136647	4.94e-06	-0.032	0.038	0.4	0.00134515	21.5123
PCOS	Streptococcus	rs57646748	G	A	-0.0907696	0.0200344	5.48e-06	-0.057	0.068	0.4	0.00128619	20.5245
PCOS	Streptococcus	rs71481756	T	G	0.0931048	0.0207949	6.51e-06	0.051	0.067	0.45	0.00137811	20.0433
PCOS	Streptococcus	rs10028567	C	T	-0.0921167	0.0191881	7.3e-06	-0.041	0.052	0.43	0.00141097	23.044
PCOS	Streptococcus	rs2370083	G	T	-0.0816836	0.0185851	9.75e-06	-0.089	0.054	0.1	0.00118536	19.3146
PCOS	Sellimonas	rs2371572	A	C	0.127349	0.0250862	4.46e-07	-0.07	0.031	0.024	0.012481	39.8372
PCOS	Sellimonas	rs13417181	T	C	0.166509	0.0337521	7.62e-07	-0.023	0.067	0.73	0.00962994	29.6083
PCOS	Sellimonas	rs2016057	A	C	-0.125878	0.0256153	1.03e-06	0.047	0.032	0.14	0.0122263	39.0144
PCOS	Sellimonas	rs56203279	T	C	-0.124045	0.0269115	3.72e-06	0.029	0.034	0.4	0.0116443	37.1353
PCOS	Sellimonas	rs2187447	A	C	0.243457	0.0527695	3.98e-06	-0.046	0.073	0.53	0.00621944	18.9378
PCOS	Sellimonas	rs4600608	A	G	-0.137152	0.0301702	4.95e-06	0.053	0.041	0.19	0.0105958	33.1239
PCOS	Sellimonas	rs553697	T	C	-0.153767	0.0339099	6.13e-06	0.11	0.046	0.019	0.00958557	29.4706
PCOS	Sellimonas	rs113379006	T	C	-0.162759	0.0357025	7.21e-06	0.0038	0.045	0.93	0.00880238	27.9915
PCOS	Sellimonas	rs41816	A	G	0.132201	0.0291087	8.39e-06	-0.07	0.037	0.058	0.0107748	34.3322
PCOS	RuminococcaceaeUCG011	rs1416041	A	C	-0.182339	0.0339898	7.04e-08	0.11	0.044	0.015	0.00803529	29.4044
PCOS	RuminococcaceaeUCG011	rs12724320	C	T	-0.120881	0.0249229	1.52e-06	-0.024	0.033	0.48	0.0109266	40.1016
PCOS	RuminococcaceaeUCG011	rs79113084	C	T	-0.152166	0.0317519	2.06e-06	0.062	0.05	0.21	0.00864869	31.4767
PCOS	RuminococcaceaeUCG011	rs9729514	A	G	0.184934	0.0394616	2.37e-06	-0.085	0.051	0.097	0.00692882	25.3271
PCOS	RuminococcaceaeUCG011	rs12636310	G	A	0.132725	0.0282037	2.81e-06	-0.025	0.039	0.53	0.00966784	35.4369
PCOS	RuminococcaceaeUCG011	rs2729556	C	T	-0.109097	0.0233699	3.19e-06	0.0019	0.034	0.95	0.0116442	42.7665
PCOS	RuminococcaceaeUCG011	rs10274562	C	T	0.110917	0.0244556	6.5e-06	0.0043	0.033	0.9	0.0111331	40.868
PCOS	RuminococcaceaeUCG011	rs4490371	T	C	-0.111816	0.0248963	7.75e-06	0.078	0.033	0.017	0.0110041	40.1444
PCOS	RuminococcaceaeUCG005	rs10950694	T	C	0.0577628	0.011412	4.3e-07	0.0052	0.032	0.87	0.00161672	25.6164
PCOS	RuminococcaceaeUCG005	rs34781347	G	A	0.188685	0.0386484	6.05e-07	0.065	0.066	0.32	0.00391708	23.8269
PCOS	RuminococcaceaeUCG005	rs12458218	T	C	0.0677322	0.0144525	2.41e-06	0.011	0.039	0.78	0.00136243	21.9609
PCOS	RuminococcaceaeUCG005	rs7555878	A	G	0.0586677	0.0125277	2.81e-06	-0.018	0.036	0.62	0.00136031	21.928
PCOS	RuminococcaceaeUCG005	rs12288512	A	G	0.066635	0.0144356	3.1e-06	0.026	0.04	0.52	0.0013752	21.305
PCOS	RuminococcaceaeUCG005	rs114279581	A	G	-0.146604	0.0316034	3.22e-06	0.042	0.068	0.54	0.00253568	21.514
PCOS	RuminococcaceaeUCG005	rs2893871	G	A	-0.073644	0.015548	3.54e-06	-0.051	0.046	0.26	0.00139128	22.4322
PCOS	RuminococcaceaeUCG005	rs10873449	T	C	0.0654843	0.0143973	4.11e-06	0.1	0.041	0.013	0.00128345	20.685
PCOS	RuminococcaceaeUCG005	rs7449320	C	A	0.0599163	0.0130836	4.81e-06	0.016	0.038	0.67	0.0013013	20.9691
PCOS	RuminococcaceaeUCG005	rs72776570	C	A	0.087067	0.0197179	5.36e-06	-0.0093	0.053	0.86	0.00126646	19.4953
PCOS	RuminococcaceaeUCG005	rs55793120	T	C	0.121548	0.0279546	7.37e-06	-0.026	0.069	0.7	0.00168154	18.9021
PCOS	RuminococcaceaeUCG005	rs898577	T	C	-0.123012	0.0286671	7.46e-06	-0.16	0.077	0.041	0.00183959	18.4095
PCOS	RuminococcaceaeUCG005	rs10937802	G	A	0.0755811	0.0168226	8.17e-06	0.078	0.056	0.17	0.00127424	20.1829
PCOS	RuminococcaceaeUCG005	rs7586445	G	A	0.0782349	0.0176458	8.81e-06	0.045	0.046	0.32	0.00130019	19.6545
PCOS	Coprococcus2	rs6677933	C	T	-0.0804405	0.0164216	1.19e-06	0.036	0.039	0.36	0.00208524	23.9906
PCOS	Coprococcus2	rs72680320	T	C	-0.0649382	0.013919	2.27e-06	0.052	0.031	0.098	0.00197324	21.7623
PCOS	Coprococcus2	rs2482516	C	T	0.0754415	0.0164619	4.72e-06	-0.0063	0.039	0.87	0.00182563	20.9984
PCOS	Coprococcus2	rs9426473	A	G	0.0727361	0.0161662	6.31e-06	-0.042	0.039	0.28	0.00175935	20.24
PCOS	Coprococcus2	rs61823518	A	C	-0.0955381	0.0215724	6.68e-06	-0.044	0.058	0.45	0.00178311	19.6099
PCOS	Coprococcus2	rs10070053	A	G	0.0594312	0.0135375	7.65e-06	0.049	0.033	0.13	0.00167704	19.2697
PCOS	Coprococcus2	rs35890118	A	G	-0.066536	0.0147661	8.26e-06	0.08	0.034	0.019	0.00176583	20.3005
PCOS	Coprococcus2	rs12634070	T	C	0.0736486	0.0164921	9.95e-06	-0.056	0.04	0.16	0.0017376	19.9388
PCOS	Ruminococcusgauvreauiigroup	rs2047242	A	G	-0.067603	0.0133738	2.46e-07	0.016	0.034	0.65	0.00190764	25.5481
PCOS	Ruminococcusgauvreauiigroup	rs71386687	T	G	0.121037	0.02386	2.91e-07	-0.013	0.077	0.87	0.00226412	25.7288
PCOS	Ruminococcusgauvreauiigroup	rs9870933	A	G	0.0621643	0.0126072	8.49e-07	-0.085	0.032	0.0075	0.00181358	24.3098
PCOS	Ruminococcusgauvreauiigroup	rs1391597	C	T	0.0590284	0.0124874	1.86e-06	-0.037	0.032	0.25	0.001667	22.3417
PCOS	Ruminococcusgauvreauiigroup	rs289410	G	A	-0.0654926	0.0139101	2.27e-06	0.02	0.036	0.58	0.00165405	22.1645
PCOS	Ruminococcusgauvreauiigroup	rs10931481	G	A	0.0610096	0.0130484	3.38e-06	0.036	0.033	0.27	0.00163098	21.8582
PCOS	Ruminococcusgauvreauiigroup	rs12539819	C	T	0.110654	0.0240684	4.49e-06	-0.028	0.079	0.72	0.00177901	21.1332
PCOS	Ruminococcusgauvreauiigroup	rs12079579	A	G	0.0955324	0.0213436	5.04e-06	-0.063	0.056	0.26	0.00154035	20.0308
PCOS	Ruminococcusgauvreauiigroup	rs2105937	A	G	0.0580215	0.0127806	5.1e-06	-0.014	0.034	0.69	0.00153982	20.6069
PCOS	Ruminococcusgauvreauiigroup	rs2166943	A	C	0.0566974	0.0123497	5.28e-06	-0.046	0.032	0.15	0.00157316	21.0742
PCOS	Ruminococcusgauvreauiigroup	rs431418	A	G	-0.094737	0.0210157	5.54e-06	0.0094	0.057	0.87	0.00152685	20.3182
PCOS	Ruminococcusgauvreauiigroup	rs73802842	C	A	0.0736808	0.0169665	7.48e-06	0.045	0.044	0.3	0.00140732	18.8565
PCOS	Victivallis	rs56349194	A	G	-0.158501	0.0315231	6.26e-07	-0.04	0.041	0.32	0.00768144	25.2663
PCOS	Victivallis	rs4764863	G	A	0.121561	0.0246058	8.22e-07	0.029	0.031	0.36	0.00741755	24.3918
PCOS	Victivallis	rs12512543	A	C	-0.178036	0.0374344	2.54e-06	-0.031	0.053	0.56	0.0069349	22.605
PCOS	Victivallis	rs4895919	T	C	-0.116918	0.0247515	2.75e-06	-0.032	0.032	0.31	0.00681034	22.2991
PCOS	Victivallis	rs11899949	G	A	0.130568	0.0276239	2.77e-06	-0.014	0.035	0.68	0.00681057	22.3273
PCOS	Victivallis	rs173120	T	C	0.13381	0.0290127	7.65e-06	-0.003	0.037	0.93	0.00647679	21.2585
PCOS	Victivallis	rs911666	T	C	-0.118576	0.0263146	7.65e-06	-0.0098	0.033	0.76	0.00617673	20.2924
PCOS	Victivallis	rs342302	A	G	-0.152754	0.0351572	8.16e-06	-0.01	0.046	0.83	0.0057487	18.8665
PCOS	Victivallis	rs1882775	A	G	-0.13827	0.031273	8.73e-06	0.047	0.04	0.24	0.00596445	19.5368
PCOS	Victivallis	rs2546432	T	C	-0.110803	0.0249655	9.93e-06	-0.022	0.032	0.49	0.0059951	19.686
PCOS	Veillonella	rs1882878	A	G	-0.0768966	0.0163908	2.98e-06	-0.011	0.036	0.77	0.0023656	22.0049
PCOS	Veillonella	rs2013594	T	C	-0.0720698	0.0155153	3.42e-06	-0.0098	0.035	0.78	0.00231894	21.5721
PCOS	Veillonella	rs62376424	C	T	-0.0762216	0.0163499	3.65e-06	-0.024	0.034	0.47	0.00240926	21.7284
PCOS	Veillonella	rs742016	A	G	-0.0688571	0.0149769	4.66e-06	0.043	0.033	0.2	0.00227281	21.1329
PCOS	Veillonella	rs6656807	A	G	0.0703062	0.0153954	5.5e-06	-0.029	0.041	0.49	0.0023121	20.8502
PCOS	Veillonella	rs55807413	A	G	0.107329	0.0237633	5.51e-06	0.006	0.052	0.91	0.00236369	20.3949
PCOS	Veillonella	rs11141494	G	A	-0.0783421	0.0174393	9.75e-06	-0.0048	0.036	0.89	0.00216736	20.1763
PCOS	Tyzzerella3	rs67476743	T	G	0.132164	0.022208	3.74e-09	-0.048	0.037	0.2	0.00710688	35.4022
PCOS	Tyzzerella3	rs17706273	T	C	-0.140368	0.0274708	5.88e-07	0.0041	0.046	0.93	0.00481624	26.0997
PCOS	Tyzzerella3	rs55799124	A	G	-0.11435	0.0238604	1.34e-06	-0.047	0.045	0.3	0.00426515	22.9591
PCOS	Tyzzerella3	rs7561370	T	C	0.131341	0.0286292	1.52e-06	0.046	0.046	0.32	0.00388525	21.0388
PCOS	Tyzzerella3	rs75091807	G	T	-0.184966	0.0383029	1.71e-06	-0.075	0.063	0.24	0.0050211	23.3095
PCOS	Tyzzerella3	rs7019909	T	C	0.144156	0.0301626	1.76e-06	-0.041	0.051	0.43	0.00421519	22.833
PCOS	Tyzzerella3	rs4904512	T	C	-0.117151	0.0250306	3.09e-06	-0.03	0.041	0.46	0.00404314	21.8972
PCOS	Tyzzerella3	rs6920448	C	T	-0.141081	0.0305446	4.15e-06	-0.058	0.05	0.25	0.00424017	21.3252
PCOS	Tyzzerella3	rs7333521	T	C	-0.207191	0.0453121	4.88e-06	-0.0069	0.068	0.92	0.00479996	20.8985
PCOS	Tyzzerella3	rs112102233	A	G	-0.216348	0.0477575	6.18e-06	0.054	0.074	0.46	0.00529261	20.5116
PCOS	Tyzzerella3	rs191093	G	A	0.159008	0.0353306	6.76e-06	-0.029	0.07	0.68	0.00436417	20.2465
PCOS	Tyzzerella3	rs1232220	G	T	-0.143869	0.031828	7.91e-06	0.027	0.052	0.6	0.00406982	20.4241
PCOS	Tyzzerella3	rs10898797	C	T	0.12238	0.0274683	8.85e-06	0.046	0.046	0.32	0.00367127	19.8426
PCOS	Turicibacter	rs149744580	A	G	0.169883	0.0315478	7.01e-08	0.021	0.071	0.77	0.00341628	28.9905
PCOS	Turicibacter	rs12603364	T	C	0.110861	0.0225598	8.67e-07	0.0011	0.047	0.98	0.00269898	24.1428
PCOS	Turicibacter	rs11054680	T	C	-0.104751	0.0226998	2.31e-06	-0.017	0.048	0.73	0.00237951	21.2901
PCOS	Turicibacter	rs4869133	G	A	0.131186	0.027197	2.55e-06	-0.035	0.059	0.55	0.00281024	23.2611
PCOS	Turicibacter	rs55756211	T	C	-0.115115	0.0240708	2.81e-06	0.082	0.051	0.1	0.00255147	22.8659
PCOS	Turicibacter	rs2834977	T	C	-0.0959995	0.0208261	3.96e-06	-0.038	0.043	0.38	0.00236953	21.2435
PCOS	Turicibacter	rs3734633	G	A	-0.120957	0.02683	5.32e-06	0.024	0.054	0.66	0.00235064	20.3197
PCOS	Turicibacter	rs2952020	G	A	-0.0759019	0.0165764	5.63e-06	0.054	0.036	0.14	0.00233741	20.9618
PCOS	Turicibacter	rs7199484	G	A	-0.0731428	0.0160172	5.77e-06	0.012	0.034	0.72	0.00232507	20.8485
PCOS	Turicibacter	rs11666533	C	T	-0.111689	0.0248436	7.37e-06	0.033	0.056	0.55	0.00244208	20.2063
PCOS	Terrisporobacter	rs1883097	C	T	0.226399	0.0454642	4.16e-07	0.06	0.068	0.38	0.00558278	24.7864
PCOS	Terrisporobacter	rs2872237	C	A	-0.0775591	0.0174641	3.97e-06	0.044	0.033	0.18	0.00322105	21.4246
PCOS	Terrisporobacter	rs58405430	G	T	-0.0814505	0.0175943	7.94e-06	0.031	0.053	0.56	0.00322438	19.9717
PCOS	Terrisporobacter	rs7184125	T	C	0.134617	0.0301177	8.48e-06	-0.018	0.039	0.65	0.00315448	19.7146
PCOS	Terrisporobacter	rs2569953	A	C	0.091256	0.0205493	8.95e-06	0.053	0.032	0.1	0.00296287	19.7171
PCOS	Sutterella	rs2321387	G	A	-0.0592876	0.0124509	1.87e-06	-0.054	0.031	0.085	0.00170805	22.6704
PCOS	Sutterella	rs7499539	A	G	0.0617478	0.0130998	2.36e-06	-0.027	0.034	0.43	0.00167354	22.215
PCOS	Sutterella	rs13173038	A	G	-0.0718076	0.0151627	2.73e-06	0.002	0.038	0.96	0.00169044	22.4245
PCOS	Sutterella	rs143438747	T	C	-0.145793	0.0306867	3.28e-06	0.015	0.072	0.84	0.00240369	22.5672
PCOS	Sutterella	rs62501473	G	A	0.0694233	0.0149416	5.52e-06	0.085	0.039	0.031	0.00168873	21.5846
PCOS	Sutterella	rs11591622	T	G	-0.0688382	0.0151375	6.5e-06	-0.026	0.037	0.48	0.00163806	20.6767
PCOS	Sutterella	rs607327	C	T	0.0578334	0.0129053	6.63e-06	0.0043	0.032	0.89	0.00151327	20.0797
PCOS	Sutterella	rs1145877	A	G	-0.073548	0.0162413	7.2e-06	-0.037	0.043	0.39	0.00154518	20.5037
PCOS	Sutterella	rs2613606	C	T	-0.0556794	0.0124117	7.2e-06	0.023	0.031	0.46	0.00151663	20.1214
PCOS	Sutterella	rs2050185	G	A	0.0575138	0.0128766	7.97e-06	0.027	0.033	0.42	0.00150418	19.9469
PCOS	Sutterella	rs9350083	T	G	-0.0593069	0.0133929	8.23e-06	-0.018	0.034	0.6	0.0014773	19.6062
PCOS	Sutterella	rs7638039	T	C	0.0645624	0.0143887	8.66e-06	-0.014	0.038	0.72	0.0015188	20.1304
PCOS	Subdoligranulum	rs10065321	T	C	-0.0512828	0.0108105	2.1e-06	-0.022	0.032	0.49	0.00127777	22.5009
PCOS	Subdoligranulum	rs4347804	A	G	0.166063	0.0357483	2.18e-06	-0.062	0.077	0.42	0.00497953	21.5692
PCOS	Subdoligranulum	rs2114677	C	T	-0.104176	0.0230829	2.72e-06	0.037	0.06	0.54	0.00130681	20.3658
PCOS	Subdoligranulum	rs6555306	T	C	-0.0740777	0.0155463	2.81e-06	-0.013	0.046	0.78	0.00128905	22.7024
PCOS	Subdoligranulum	rs3761728	T	G	-0.0543458	0.0118866	3.87e-06	-0.044	0.034	0.2	0.0011883	20.901
PCOS	Subdoligranulum	rs35940633	G	A	-0.0511008	0.011001	4.22e-06	-0.0037	0.032	0.91	0.00122571	21.5745
PCOS	Subdoligranulum	rs2171249	C	T	0.106744	0.0233213	4.51e-06	0.029	0.068	0.67	0.00142516	20.947
PCOS	Subdoligranulum	rs1667315	G	A	0.0485017	0.0107452	6.72e-06	0.074	0.032	0.023	0.00115722	20.3721
PCOS	Subdoligranulum	rs76528319	G	T	-0.143279	0.0310662	7.41e-06	0.04	0.074	0.59	0.00250562	21.2659
PCOS	Subdoligranulum	rs75158211	T	C	-0.072343	0.015933	7.52e-06	0.0093	0.046	0.84	0.00119958	20.6132
PCOS	Subdoligranulum	rs10497836	C	T	-0.0524065	0.0118697	8.38e-06	0.052	0.037	0.16	0.00110768	19.4912
PCOS	Slackia	rs8901	C	T	0.0934594	0.0186813	6.07e-07	-0.028	0.032	0.38	0.00411107	25.0201
PCOS	Slackia	rs4492265	A	G	-0.0905757	0.0191658	2.41e-06	-0.0059	0.034	0.86	0.00367014	22.3267
PCOS	Slackia	rs12440440	A	G	0.0901934	0.0190582	2.63e-06	-0.0061	0.033	0.85	0.00368039	22.3893
PCOS	Slackia	rs16894137	C	T	-0.122792	0.0263047	2.71e-06	-0.029	0.045	0.51	0.00358121	21.7837
PCOS	Slackia	rs10409783	A	G	0.0950828	0.0211239	7.7e-06	-0.11	0.039	0.006	0.00339873	20.2539
PCOS	Slackia	rs35156985	T	C	-0.155709	0.0348085	8.06e-06	0.057	0.072	0.43	0.00334343	20.0037
PCOS	Senegalimassilia	rs11787826	C	A	0.081327	0.0171154	2.63e-06	-0.014	0.031	0.66	0.00325077	22.572
PCOS	Senegalimassilia	rs7225245	G	A	0.079173	0.0170421	4.18e-06	-0.021	0.035	0.55	0.00310786	21.5766
PCOS	Senegalimassilia	rs10036909	C	T	0.185519	0.0400881	8.05e-06	0.061	0.061	0.32	0.00426842	21.4079
PCOS	Senegalimassilia	rs1990708	A	C	-0.109619	0.0247785	8.91e-06	0.0048	0.048	0.92	0.00281906	19.5659
PCOS	Senegalimassilia	rs2017373	C	T	0.0782258	0.0176841	9.5e-06	0.036	0.034	0.29	0.00281848	19.5618
PCOS	Ruminococcus2	rs78120384	A	G	-0.192815	0.0392045	3.31e-07	-0.0014	0.091	0.99	0.00396134	24.1807
PCOS	Ruminococcus2	rs7635831	G	A	0.0618344	0.0129031	1.98e-06	0.0077	0.04	0.85	0.00153645	22.9622
PCOS	Ruminococcus2	rs12986628	C	T	0.0665937	0.0140168	2.14e-06	0.013	0.037	0.73	0.00153169	22.5688
PCOS	Ruminococcus2	rs2368224	T	G	0.199648	0.0438453	3.63e-06	0.11	0.089	0.2	0.00680529	20.7202
PCOS	Ruminococcus2	rs75140805	T	G	0.0836825	0.0176445	3.95e-06	-0.0063	0.055	0.91	0.00157609	22.49
PCOS	Ruminococcus2	rs58681734	A	G	0.0723875	0.0160787	4.18e-06	-0.0033	0.046	0.94	0.00131972	20.266
PCOS	Ruminococcus2	rs2997412	A	G	-0.0568439	0.0122325	4.22e-06	-0.013	0.034	0.7	0.0014061	21.5915
PCOS	Ruminococcus2	rs1819812	G	T	0.0842356	0.0184893	5.28e-06	-0.11	0.059	0.053	0.00139409	20.7535
PCOS	Ruminococcus2	rs4799823	C	T	0.0837001	0.0182263	5.4e-06	-0.041	0.05	0.41	0.00143746	21.0862
PCOS	Ruminococcus2	rs4400279	A	G	0.0546114	0.0120077	5.8e-06	-0.025	0.032	0.44	0.0013472	20.6817
PCOS	Ruminococcus2	rs61791565	T	C	-0.0523503	0.0117119	6.79e-06	-0.03	0.032	0.35	0.00130253	19.9769
PCOS	Ruminococcus2	rs2846589	G	T	0.0522093	0.0116382	7.59e-06	0.041	0.034	0.22	0.00134666	20.1219
PCOS	Ruminococcus2	rs55707116	C	A	0.0865521	0.0189141	8.01e-06	0.0013	0.052	0.98	0.00136358	20.9377
PCOS	Ruminococcus2	rs7693984	G	A	-0.102822	0.0235087	9.42e-06	-0.038	0.07	0.58	0.00134974	19.1273
PCOS	Ruminococcus2	rs12406309	A	C	-0.063193	0.0142275	9.79e-06	0.001	0.04	0.98	0.00128447	19.7252
PCOS	Romboutsia	rs61841503	G	A	0.092888	0.0171454	4e-08	0.014	0.042	0.74	0.00215859	29.3467
PCOS	Romboutsia	rs10279978	A	G	-0.0622202	0.0127675	1.17e-06	-0.037	0.036	0.3	0.0016764	23.7458
PCOS	Romboutsia	rs62504452	A	G	-0.0710048	0.0156654	4.66e-06	-0.02	0.041	0.63	0.00144693	20.5414
PCOS	Romboutsia	rs75200530	T	G	-0.190644	0.0421065	5.07e-06	0.0028	0.076	0.97	0.00389249	20.492
PCOS	Romboutsia	rs16843578	C	T	-0.0875276	0.0196779	5.08e-06	0.07	0.054	0.2	0.00139274	19.7821
PCOS	Romboutsia	rs9567264	C	T	0.0580018	0.0127495	5.76e-06	-0.033	0.033	0.32	0.00145743	20.6937
PCOS	Romboutsia	rs34302036	A	G	0.0550261	0.0120835	5.88e-06	-0.072	0.031	0.021	0.00145979	20.7345
PCOS	Romboutsia	rs11221428	T	C	-0.0726779	0.0158263	6.49e-06	0.035	0.04	0.39	0.00148426	21.0855
PCOS	Romboutsia	rs75987356	G	A	-0.129578	0.0280454	6.71e-06	-0.042	0.071	0.55	0.00203552	21.3431
PCOS	Romboutsia	rs7109293	A	G	0.0919112	0.0205738	6.98e-06	0.021	0.066	0.74	0.00140933	19.9547
PCOS	Romboutsia	rs77702691	A	G	-0.094406	0.0208544	7.37e-06	-0.0045	0.055	0.93	0.00163844	20.4895
PCOS	Romboutsia	rs28603357	T	C	-0.214911	0.0474739	8.52e-06	0.032	0.086	0.71	0.00551854	20.482
PCOS	Romboutsia	rs9389266	T	G	0.0722815	0.0162353	9.38e-06	0.12	0.044	0.0083	0.00139519	19.8185
PCOS	Ruminococcus1	rs7117576	A	G	0.0829505	0.0170891	6.48e-07	0.075	0.053	0.16	0.00141683	23.5584
PCOS	Ruminococcus1	rs17781867	C	T	0.0999271	0.0211728	1.96e-06	-0.11	0.079	0.16	0.00154994	22.2715
PCOS	Ruminococcus1	rs7583465	C	T	0.0527654	0.0112619	2.56e-06	-0.0087	0.032	0.79	0.00132162	21.9495
PCOS	Ruminococcus1	rs6493760	C	T	0.0535262	0.0115885	3.38e-06	-0.072	0.035	0.041	0.00132124	21.3318
PCOS	Ruminococcus1	rs11783695	G	T	-0.0734114	0.0161398	4.73e-06	0.091	0.046	0.048	0.0012443	20.6861
PCOS	Ruminococcus1	rs6105066	T	C	-0.0607052	0.013425	5.06e-06	-0.0086	0.041	0.83	0.0012724	20.4442
PCOS	Ruminococcus1	rs78613526	G	A	0.167497	0.0367639	5.11e-06	-0.0016	0.1	0.99	0.00284862	20.7515
PCOS	Ruminococcus1	rs78572139	G	A	0.125038	0.0279411	5.23e-06	-0.048	0.07	0.49	0.00171352	20.0226
PCOS	Ruminococcus1	rs10167839	A	G	0.0519509	0.0116306	8.09e-06	-0.015	0.033	0.64	0.0012001	19.9492
PCOS	Ruminococcus1	rs3819978	C	T	-0.11504	0.0260137	8.74e-06	-0.16	0.073	0.03	0.00152922	19.5535
PCOS	RuminococcaceaeUCG009	rs1550196	G	A	0.130842	0.0262478	1.13e-06	0.035	0.053	0.52	0.00335168	24.8421
PCOS	RuminococcaceaeUCG009	rs4708333	T	G	-0.084033	0.0174757	1.56e-06	0.06	0.034	0.073	0.003069	23.1161
PCOS	RuminococcaceaeUCG009	rs2058609	A	G	0.0816464	0.017472	3.12e-06	-0.048	0.034	0.16	0.00289928	21.8311
PCOS	RuminococcaceaeUCG009	rs4079028	C	T	0.0915623	0.019936	3.28e-06	0.012	0.038	0.76	0.0028121	21.0882
PCOS	RuminococcaceaeUCG009	rs12508214	C	T	-0.0774649	0.0168937	4.75e-06	0.0092	0.035	0.79	0.00279157	21.0206
PCOS	RuminococcaceaeUCG009	rs2192926	A	G	-0.089048	0.0192989	4.88e-06	-0.064	0.036	0.077	0.00282655	21.2847
PCOS	RuminococcaceaeUCG009	rs9558661	T	C	-0.0897823	0.0200739	7.01e-06	-0.0037	0.039	0.92	0.00266721	19.9988
PCOS	RuminococcaceaeUCG009	rs113006825	T	C	-0.0928893	0.0208035	7.98e-06	0.02	0.037	0.59	0.00277483	19.9314
PCOS	RuminococcaceaeUCG009	rs6952765	G	A	0.0732099	0.0166777	8.13e-06	-0.0017	0.032	0.96	0.00255892	19.2643
PCOS	RuminococcaceaeUCG009	rs758191	T	G	0.17702	0.0375113	9.01e-06	-0.063	0.074	0.39	0.00380599	22.2622
PCOS	RuminococcaceaeUCG009	rs78410648	A	G	0.120989	0.0277317	9.67e-06	0.046	0.054	0.39	0.00252813	19.0293
PCOS	RuminococcaceaeUCG009	rs138460696	A	G	0.139274	0.0315794	9.81e-06	-0.16	0.063	0.011	0.0028253	19.4449
PCOS	RuminococcaceaeUCG014	rs115777838	T	C	-0.18835	0.0386643	4.62e-07	-0.08	-0.18835	-0.08	0.00416492	23.7222
PCOS	RuminococcaceaeUCG014	rs12638134	T	G	0.0582548	0.0119657	1.21e-06	-0.058	0.0582548	-0.058	0.00164293	23.6987
PCOS	RuminococcaceaeUCG014	rs995642	C	T	0.060048	0.0126417	1.9e-06	-0.02	0.060048	-0.02	0.00156417	22.5593
PCOS	RuminococcaceaeUCG014	rs10941294	C	T	-0.122057	0.0260017	2.4e-06	0.15	-0.122057	0.15	0.00174374	22.0322
PCOS	RuminococcaceaeUCG014	rs72809222	T	C	0.0671775	0.0139838	2.41e-06	-0.021	0.0671775	-0.021	0.00165492	23.0747
PCOS	RuminococcaceaeUCG014	rs56105232	G	A	0.139276	0.0299132	2.91e-06	0.034	0.139276	0.034	0.00235335	21.6736
PCOS	RuminococcaceaeUCG014	rs73186226	G	A	-0.0993852	0.0216819	6.72e-06	-0.0021	-0.0993852	-0.0021	0.00152465	21.0081
PCOS	RuminococcaceaeUCG014	rs853612	A	G	-0.0528257	0.0119367	9.75e-06	0.015	-0.0528257	0.015	0.00135794	19.5823
PCOS	RuminococcaceaeUCG014	rs10791168	A	G	-0.0664624	0.0150069	9.76e-06	-0.015	-0.0664624	-0.015	0.00135996	19.6115
PCOS	RuminococcaceaeUCG014	rs34402072	C	T	-0.0688023	0.0156083	9.8e-06	-0.021	-0.0688023	-0.021	0.00139968	19.4282
PCOS	RuminococcaceaeUCG014	rs10495392	C	T	-0.082486	0.0187194	9.96e-06	-0.081	-0.082486	-0.081	0.00139473	19.4139
PCOS	RuminococcaceaeUCG013	rs12781711	C	T	-0.0656129	0.0117477	2.55e-08	-0.029	0.033	0.38	0.00185645	31.1906
PCOS	RuminococcaceaeUCG013	rs12189346	G	A	0.0684961	0.014558	1.68e-06	-0.1	0.045	0.027	0.0013423	22.1347
PCOS	RuminococcaceaeUCG013	rs75088940	T	C	-0.0942968	0.0200712	2.55e-06	0.053	0.057	0.35	0.00140946	22.0694
PCOS	RuminococcaceaeUCG013	rs76973485	G	T	0.194976	0.0418213	3.35e-06	0.04	0.077	0.6	0.00408501	21.7271
PCOS	RuminococcaceaeUCG013	rs16918863	A	C	0.111491	0.0240157	4.16e-06	0.043	0.066	0.51	0.00170177	21.5488
PCOS	RuminococcaceaeUCG013	rs12485353	G	A	-0.0607903	0.0130847	4.19e-06	-0.031	0.039	0.42	0.00128536	21.5819
PCOS	RuminococcaceaeUCG013	rs11581881	C	T	0.0661211	0.0144736	4.73e-06	0.061	0.045	0.18	0.00132501	20.8674
PCOS	RuminococcaceaeUCG013	rs4385846	G	T	0.0598405	0.0131807	6.46e-06	0.003	0.038	0.94	0.00122743	20.6092
PCOS	RuminococcaceaeUCG013	rs7784330	G	A	-0.0498329	0.0112066	8.16e-06	0.0088	0.032	0.78	0.00117771	19.7712
PCOS	RuminococcaceaeUCG013	rs2730183	G	A	-0.0488692	0.0109907	8.44e-06	0.038	0.031	0.21	0.00117739	19.7681
PCOS	RuminococcaceaeUCG013	rs12336782	T	C	-0.0856047	0.0189311	8.6e-06	-0.062	0.058	0.28	0.00121767	20.4452
PCOS	RuminococcaceaeUCG013	rs9313055	T	C	0.105087	0.023446	9.55e-06	0.064	0.067	0.34	0.00127275	20.0866
PCOS	RuminococcaceaeUCG010	rs682403	A	G	-0.0588161	0.0124671	2.37e-06	0.016	0.032	0.6	0.00172716	22.2531
PCOS	RuminococcaceaeUCG010	rs6958419	C	T	-0.0585718	0.0124994	2.84e-06	0.024	0.031	0.44	0.00170326	21.955
PCOS	RuminococcaceaeUCG010	rs2820282	A	C	-0.0592304	0.0125917	2.85e-06	-0.026	0.033	0.42	0.00171698	22.1235
PCOS	RuminococcaceaeUCG010	rs12597105	G	A	0.0670855	0.0144415	4.87e-06	0.023	0.038	0.55	0.00173513	21.5756
PCOS	RuminococcaceaeUCG010	rs73218807	G	A	-0.166211	0.0367938	6.43e-06	-0.063	0.077	0.42	0.00303018	20.4004
PCOS	RuminococcaceaeUCG010	rs7441445	C	T	-0.05695	0.0126502	6.8e-06	0.037	0.032	0.25	0.00157447	20.2639
PCOS	RuminococcaceaeUCG004	rs6769553	A	G	0.0849743	0.0157451	7.91e-08	0.03	0.034	0.37	0.00305624	29.1202
PCOS	RuminococcaceaeUCG004	rs12125734	G	T	0.133972	0.0257417	2.09e-07	-0.0087	0.055	0.87	0.00302133	27.0804
PCOS	RuminococcaceaeUCG004	rs511258	G	A	-0.0757474	0.0162475	4.52e-06	0.041	0.036	0.26	0.00228269	21.7306
PCOS	RuminococcaceaeUCG004	rs9818949	G	T	0.0859927	0.0188671	5.39e-06	-0.086	0.042	0.039	0.00227362	20.769
PCOS	RuminococcaceaeUCG004	rs872501	G	A	0.116125	0.025946	5.81e-06	0.029	0.067	0.66	0.00235855	20.0265
PCOS	RuminococcaceaeUCG004	rs3800154	A	C	-0.0797959	0.0177639	6.12e-06	-0.056	0.04	0.15	0.00214066	20.1739
PCOS	RuminococcaceaeUCG004	rs10976229	T	G	0.095976	0.0214554	7.04e-06	-0.061	0.045	0.18	0.00219026	20.0059
PCOS	RuminococcaceaeUCG004	rs7569771	A	G	-0.075914	0.0170308	8.12e-06	-0.027	0.039	0.5	0.00208666	19.8647
PCOS	RuminococcaceaeUCG004	rs2248146	T	C	0.0689452	0.0153649	8.2e-06	0.014	0.033	0.68	0.00211452	20.1306
PCOS	RuminococcaceaeUCG004	rs11961899	G	A	-0.0707825	0.0161381	9.18e-06	-0.027	0.034	0.43	0.00202068	19.2333
PCOS	RuminococcaceaeUCG004	rs550351	A	C	0.078587	0.018003	9.43e-06	0.0002	0.032	1	0.0020022	19.051
PCOS	RuminococcaceaeUCG003	rs73341549	T	C	-0.169857	0.0318768	1.51e-07	-0.074	0.066	0.26	0.00419253	28.3851
PCOS	RuminococcaceaeUCG003	rs646327	G	A	0.0586696	0.011837	7.83e-07	-0.012	0.031	0.7	0.00170241	24.5633
PCOS	RuminococcaceaeUCG003	rs6759615	A	G	0.102523	0.0200204	7.86e-07	0.026	0.059	0.66	0.00181653	26.2202
PCOS	RuminococcaceaeUCG003	rs11613919	G	T	0.0727604	0.0155716	1.63e-06	-0.032	0.043	0.46	0.00152353	21.8304
PCOS	RuminococcaceaeUCG003	rs11243416	T	C	-0.0925653	0.0191203	1.67e-06	-0.028	0.051	0.58	0.00167081	23.4339
PCOS	RuminococcaceaeUCG003	rs16959793	A	C	-0.062527	0.0131259	2.22e-06	0.013	0.035	0.7	0.00157207	22.6892
PCOS	RuminococcaceaeUCG003	rs4452755	A	C	-0.0634463	0.0134741	3.29e-06	-0.025	0.035	0.49	0.00153675	22.1694
PCOS	RuminococcaceaeUCG003	rs10490280	C	T	-0.0672094	0.0143309	4.16e-06	-0.0066	0.04	0.87	0.00156811	21.9912
PCOS	RuminococcaceaeUCG003	rs3013089	G	A	-0.0551473	0.0120346	4.38e-06	-0.083	0.032	0.0093	0.00145529	20.9955
PCOS	RuminococcaceaeUCG003	rs4532474	G	A	0.0769231	0.017045	4.82e-06	0.0075	0.047	0.87	0.00141119	20.3639
PCOS	RuminococcaceaeUCG003	rs2523124	T	C	-0.0546625	0.0120823	5.78e-06	0.063	0.032	0.052	0.00141849	20.4652
PCOS	RuminococcaceaeUCG003	rs78720113	A	G	-0.115348	0.0249601	7.59e-06	-0.057	0.075	0.44	0.00163035	21.3533
PCOS	RuminococcaceaeUCG002	rs77564310	A	C	-0.0713093	0.0140855	3.29e-07	0.04	0.04	0.32	0.00150537	25.6268
PCOS	RuminococcaceaeUCG002	rs55793120	T	C	0.137396	0.027414	4.81e-07	-0.026	0.069	0.7	0.00214802	25.1148
PCOS	RuminococcaceaeUCG002	rs10927423	C	A	-0.0713617	0.0147712	8.5e-07	-0.016	0.046	0.72	0.00136336	23.3371
PCOS	RuminococcaceaeUCG002	rs7155595	C	A	0.0569929	0.0116986	1.15e-06	0.0042	0.034	0.9	0.00138733	23.7312
PCOS	RuminococcaceaeUCG002	rs11750293	G	T	-0.0578304	0.0120512	1.76e-06	0.046	0.035	0.19	0.00134531	23.0249
PCOS	RuminococcaceaeUCG002	rs7120052	A	C	0.0624796	0.0135523	1.97e-06	-0.011	0.04	0.77	0.00124162	21.252
PCOS	RuminococcaceaeUCG002	rs116974815	C	A	-0.189731	0.0396566	2.03e-06	-0.028	0.092	0.76	0.00391823	22.882
PCOS	RuminococcaceaeUCG002	rs79016051	C	T	-0.0887747	0.0189424	2.34e-06	-0.047	0.058	0.41	0.00129511	21.9612
PCOS	RuminococcaceaeUCG002	rs10916131	C	T	-0.069333	0.0146753	2.87e-06	0.031	0.041	0.45	0.00130382	22.3179
PCOS	RuminococcaceaeUCG002	rs12463378	A	G	-0.0522061	0.0112086	2.96e-06	0.059	0.036	0.11	0.00127493	21.6912
PCOS	RuminococcaceaeUCG002	rs72874194	G	C	-0.0770289	0.016725	3.47e-06	-0.032	0.052	0.54	0.00127228	21.2092
PCOS	RuminococcaceaeUCG002	rs76847269	A	G	0.163508	0.0356151	5.17e-06	-0.13	0.073	0.067	0.00274617	21.0716
PCOS	RuminococcaceaeUCG002	rs882348	A	G	-0.0799946	0.0178618	5.45e-06	-0.046	0.052	0.38	0.00117177	20.0549
PCOS	RuminococcaceaeUCG002	rs7342369	C	A	-0.0527803	0.0116023	5.66e-06	0.025	0.035	0.47	0.00124129	20.6919
PCOS	RuminococcaceaeUCG002	rs56030423	G	A	-0.0982874	0.0216344	6.3e-06	-0.014	0.061	0.82	0.00137988	20.637
PCOS	RuminococcaceaeUCG002	rs11607472	A	G	-0.0780229	0.0176325	7.19e-06	0.059	0.049	0.23	0.00120112	19.5778
PCOS	RuminococcaceaeUCG002	rs57079348	T	G	-0.076573	0.017282	7.22e-06	-0.014	0.049	0.77	0.00119769	19.6296
PCOS	RuminococcaceaeUCG002	rs10964441	G	A	-0.14906	0.034486	7.45e-06	-0.083	0.072	0.25	0.00348252	18.6756
PCOS	RuminococcaceaeUCG002	rs113147300	A	G	-0.075842	0.0164562	7.69e-06	0.0029	0.046	0.95	0.00129583	21.2377
PCOS	RuminococcaceaeUCG002	rs6542556	A	G	0.050974	0.011406	7.86e-06	0.0067	0.033	0.84	0.00116702	19.97
PCOS	RuminococcaceaeUCG002	rs15256	C	T	0.0732376	0.016834	9.46e-06	0.0065	0.052	0.9	0.00110597	18.9253
PCOS	RuminococcaceaeUCG002	rs6793778	C	T	-0.0558706	0.0125258	9.81e-06	-0.0009	0.036	0.98	0.00116254	19.8932
PCOS	RuminococcaceaeNK4A214group	rs5994253	A	G	-0.0811302	0.0157621	2.35e-07	0.062	0.049	0.21	0.00172996	26.4899
PCOS	RuminococcaceaeNK4A214group	rs11586410	G	A	-0.0863422	0.0169937	3.66e-07	-0.054	0.058	0.35	0.00173864	25.8114
PCOS	RuminococcaceaeNK4A214group	rs136761	G	A	-0.0587521	0.0119155	8.15e-07	-0.041	0.034	0.22	0.00163759	24.3089
PCOS	RuminococcaceaeNK4A214group	rs7573569	T	C	0.107739	0.0233638	3.23e-06	0.0022	0.062	0.97	0.0014326	21.2616
PCOS	RuminococcaceaeNK4A214group	rs12642039	T	C	-0.175266	0.0372779	3.59e-06	-0.021	0.034	0.53	0.00140232	21.449
PCOS	RuminococcaceaeNK4A214group	rs4814689	C	T	-0.1083	0.0230708	4.55e-06	-0.022	0.061	0.72	0.00157052	22.0329
PCOS	RuminococcaceaeNK4A214group	rs147475196	A	G	-0.133769	0.0295196	4.72e-06	-0.049	0.087	0.57	0.00206637	20.5305
PCOS	RuminococcaceaeNK4A214group	rs12731	A	G	-0.0527684	0.0115053	4.87e-06	0.0076	0.032	0.81	0.00137405	21.0326
PCOS	RuminococcaceaeNK4A214group	rs35559912	T	C	-0.0925071	0.0203674	4.89e-06	0.0058	0.061	0.92	0.00147386	20.6261
PCOS	RuminococcaceaeNK4A214group	rs62027366	T	C	0.0615389	0.0137612	6.58e-06	-0.038	0.04	0.34	0.0013474	19.9954
PCOS	RuminococcaceaeNK4A214group	rs11241747	C	T	0.0533858	0.0120035	6.59e-06	-0.035	0.036	0.33	0.00133276	19.7779
PCOS	RuminococcaceaeNK4A214group	rs13087692	T	G	0.0574623	0.012594	8.69e-06	-0.012	0.035	0.73	0.00135988	20.8154
PCOS	RuminococcaceaeNK4A214group	rs6681678	C	T	-0.100174	0.024	9.05e-06	0.013	0.071	0.86	0.00133515	17.4189
PCOS	Ruminiclostridium9	rs115044523	G	A	-0.0980026	0.0202616	2.37e-06	-0.011	0.056	0.84	0.00145038	23.3922
PCOS	Ruminiclostridium9	rs918449	A	G	-0.0950908	0.0197177	2.56e-06	0.075	0.067	0.26	0.00138866	23.2548
PCOS	Ruminiclostridium9	rs12040548	G	T	0.0570422	0.0122359	3.15e-06	0.041	0.037	0.27	0.00129806	21.7304
PCOS	Ruminiclostridium9	rs9522712	T	C	0.0699728	0.0154939	4.66e-06	0.013	0.042	0.76	0.00121798	20.3932
PCOS	Ruminiclostridium9	rs6082461	A	C	0.0586425	0.0131004	4.87e-06	-0.061	0.038	0.1	0.00120204	20.0357
PCOS	Ruminiclostridium9	rs7137760	C	T	0.050797	0.0112182	7.07e-06	0.037	0.033	0.25	0.00122464	20.501
PCOS	Ruminiclostridium9	rs78191726	T	C	0.0944998	0.0210206	7.58e-06	-0.13	0.056	0.024	0.00125848	20.2077
PCOS	Ruminiclostridium9	rs74303178	T	C	0.0532742	0.0119274	7.92e-06	0.0052	0.035	0.88	0.00119276	19.9477
PCOS	Ruminiclostridium9	rs9809789	C	T	-0.0717454	0.0159673	8.72e-06	0.038	0.045	0.39	0.00125828	20.1869
PCOS	Ruminiclostridium6	rs1756364	G	T	0.0999189	0.0197169	2.54e-07	-0.0082	0.064	0.9	0.0019818	25.6775
PCOS	Ruminiclostridium6	rs71414120	T	G	0.200894	0.0406434	1.08e-06	-0.17	0.072	0.018	0.0043695	24.423
PCOS	Ruminiclostridium6	rs61060922	T	G	0.15913	0.0322283	1.09e-06	-0.071	0.071	0.32	0.00271506	24.3741
PCOS	Ruminiclostridium6	rs77193512	A	G	0.0736533	0.0153163	1.3e-06	-0.011	0.04	0.79	0.00172531	23.1211
PCOS	Ruminiclostridium6	rs79968172	G	A	0.11614	0.0243083	1.66e-06	0.058	0.064	0.36	0.00177991	22.8235
PCOS	Ruminiclostridium6	rs663262	T	C	-0.13498	0.0310715	3.39e-06	-0.028	0.068	0.68	0.00239041	18.8672
PCOS	Ruminiclostridium6	rs10829821	T	C	-0.097606	0.0216072	3.47e-06	0.0001	0.055	1	0.00159142	20.4026
PCOS	Ruminiclostridium6	rs11992182	A	C	0.0625299	0.0137876	4.65e-06	0.021	0.035	0.54	0.00153478	20.5653
PCOS	Ruminiclostridium6	rs72991535	T	G	0.135604	0.0295174	4.95e-06	0.085	0.073	0.24	0.00218409	21.1007
PCOS	Ruminiclostridium6	rs2548459	C	T	0.0554866	0.0122755	6.4e-06	-0.0094	0.032	0.77	0.00152503	20.4285
PCOS	Ruminiclostridium6	rs9555756	A	C	-0.0804138	0.0176692	7.1e-06	0.042	0.047	0.37	0.00154688	20.7092
PCOS	Ruminiclostridium6	rs73176030	T	C	0.058665	0.013208	7.29e-06	0.0007	0.034	0.98	0.0014725	19.7252
PCOS	Ruminiclostridium6	rs792058	G	A	0.0554234	0.0125423	8.58e-06	-0.013	0.035	0.71	0.00150757	19.5238
PCOS	Ruminiclostridium6	rs35362464	C	A	0.0720077	0.0165387	8.99e-06	0.031	0.043	0.47	0.00142241	18.9536
PCOS	Ruminiclostridium6	rs116969552	A	G	-0.166823	0.0376681	9.16e-06	0.014	0.1	0.89	0.00286601	19.6081
PCOS	Ruminiclostridium6	rs67479537	T	C	0.118994	0.026487	9.3e-06	0.06	0.071	0.4	0.00173495	20.1795
PCOS	Ruminiclostridium5	rs79968837	A	G	-0.0950311	0.0193507	1.15e-06	0.017	0.055	0.76	0.00145059	24.1148
PCOS	Ruminiclostridium5	rs2482038	C	A	0.0518991	0.0108777	1.7e-06	0.024	0.033	0.46	0.00138475	23.4402
PCOS	Ruminiclostridium5	rs10827477	A	G	-0.0547387	0.0115163	2.19e-06	-0.012	0.033	0.73	0.00129739	22.5896
PCOS	Ruminiclostridium5	rs6121460	G	A	0.0932955	0.0199206	2.64e-06	0.025	0.063	0.69	0.00126494	21.9314
PCOS	Ruminiclostridium5	rs1492620	T	C	-0.0830505	0.0180073	3.53e-06	0.052	0.055	0.34	0.00122119	21.2685
PCOS	Ruminiclostridium5	rs113753996	T	C	0.0820689	0.0174463	3.99e-06	-0.0074	0.051	0.88	0.00132489	22.1259
PCOS	Ruminiclostridium5	rs2791343	T	C	0.051717	0.0113369	5.54e-06	-0.0003	0.033	0.99	0.00119512	20.808
PCOS	Ruminiclostridium5	rs8053158	A	G	-0.0740543	0.0159151	5.9e-06	0.028	0.054	0.61	0.00124299	21.6487
PCOS	Ruminiclostridium5	rs2833828	G	A	0.0489617	0.0108702	6.82e-06	0.039	0.031	0.21	0.00116481	20.2856
PCOS	Ruminiclostridium5	rs1223978	T	C	0.0484169	0.0108254	8.16e-06	0.03	0.032	0.34	0.00114956	20.0011
PCOS	Ruminiclostridium5	rs4955951	A	G	-0.0713749	0.0165826	9.96e-06	-0.023	0.048	0.63	0.00106377	18.524
PCOS	Roseburia	rs2160994	T	C	0.0550687	0.0112481	9.7e-07	-0.05	0.033	0.13	0.00137217	23.9663
PCOS	Roseburia	rs6930661	C	T	-0.0961587	0.0204975	2.48e-06	-0.026	0.054	0.62	0.00129709	22.0052
PCOS	Roseburia	rs16910295	T	C	-0.0980434	0.020957	2.91e-06	-0.11	0.07	0.13	0.00131295	21.884
PCOS	Roseburia	rs6445851	G	A	-0.0497336	0.0108158	3.53e-06	0.014	0.032	0.67	0.00118305	21.1413
PCOS	Roseburia	rs2943022	T	C	0.0493786	0.0106763	4.11e-06	-0.015	0.031	0.64	0.00119668	21.3887
PCOS	Roseburia	rs9300744	C	T	-0.0588452	0.0126228	4.75e-06	-0.089	0.037	0.016	0.00121576	21.7301
PCOS	Roseburia	rs329182	T	C	0.0690327	0.0152884	5.9e-06	0.046	0.046	0.33	0.00114065	20.3862
PCOS	Roseburia	rs12740451	T	C	0.0697527	0.0153607	7.34e-06	-0.13	0.047	0.0059	0.00115471	20.6181
PCOS	Roseburia	rs75326254	C	T	-0.104628	0.0230897	7.5e-06	0.019	0.07	0.78	0.0012903	20.5307
PCOS	Roseburia	rs302266	T	C	-0.0777312	0.0172985	8.13e-06	-0.028	0.051	0.58	0.00118245	20.1893
PCOS	Roseburia	rs57466170	C	T	0.0741405	0.0171601	8.3e-06	0.04	0.058	0.48	0.0010758	18.6647
PCOS	Roseburia	rs147990086	A	G	-0.0578936	0.01324	8.93e-06	-0.0069	0.039	0.86	0.0010706	19.1178
PCOS	Roseburia	rs78753150	A	C	0.0968739	0.0214067	9.98e-06	0.0083	0.067	0.9	0.00125459	20.4768
PCOS	Roseburia	rs55858165	A	C	0.179284	0.0404954	9.99e-06	0.047	0.08	0.55	0.00358555	19.5936
PCOS	RikenellaceaeRC9gutgroup	rs2900503	G	T	-0.172329	0.0326671	1.55e-07	0.0018	0.043	0.97	0.00831251	27.8121
PCOS	RikenellaceaeRC9gutgroup	rs17582787	A	G	-0.157739	0.0339924	3.55e-06	0.0018	0.044	0.97	0.00644421	21.5206
PCOS	RikenellaceaeRC9gutgroup	rs2998141	T	C	-0.136346	0.0293073	4.42e-06	0.03	0.041	0.46	0.00645772	21.631
PCOS	RikenellaceaeRC9gutgroup	rs80309088	G	A	0.17405	0.0383423	4.56e-06	-0.033	0.048	0.5	0.0064583	20.5929
PCOS	RikenellaceaeRC9gutgroup	rs9887954	G	A	-0.119376	0.0260548	4.72e-06	0.0091	0.032	0.78	0.00634752	21.2595
PCOS	RikenellaceaeRC9gutgroup	rs4270579	G	A	-0.114849	0.0249013	4.81e-06	-0.04	0.035	0.26	0.00565992	18.9491
PCOS	RikenellaceaeRC9gutgroup	rs7193937	G	C	-0.118021	0.0271041	5.46e-06	0.07	0.042	0.089	0.00618191	20.0171
PCOS	RikenellaceaeRC9gutgroup	rs12501673	A	G	0.116395	0.0262253	6.29e-06	-0.033	0.034	0.33	0.00587361	19.6865
PCOS	RikenellaceaeRC9gutgroup	rs17032291	T	C	-0.169579	0.0368251	6.61e-06	0.055	0.047	0.24	0.00657093	21.1925
PCOS	RikenellaceaeRC9gutgroup	rs7712231	A	G	0.156284	0.0350462	7.97e-06	-0.0006	0.045	0.99	0.00592923	19.874
PCOS	RikenellaceaeRC9gutgroup	rs2074881	T	C	-0.142236	0.032391	9.45e-06	0.03	0.045	0.51	0.0057832	19.2712
PCOS	Prevotella9	rs111509883	T	C	0.171131	0.0347624	1.24e-06	-0.2	0.078	0.011	0.0034699	24.2276
PCOS	Prevotella9	rs2683313	A	G	-0.0724576	0.0151603	1.69e-06	-0.036	0.033	0.28	0.00222147	22.8386
PCOS	Prevotella9	rs11685699	C	T	-0.141357	0.0295665	2.03e-06	-0.04	0.062	0.53	0.00273262	22.8525
PCOS	Prevotella9	rs746764	T	C	-0.0915772	0.0193245	2.04e-06	-0.032	0.041	0.44	0.00238719	22.4526
PCOS	Prevotella9	rs117271932	A	G	0.208089	0.0440393	2.82e-06	-0.047	0.074	0.52	0.00455608	22.3171
PCOS	Prevotella9	rs9428102	A	G	-0.0778844	0.0176068	4.62e-06	0.023	0.037	0.54	0.00190281	19.5639
PCOS	Prevotella9	rs1304512	G	A	0.0761593	0.0165885	5.29e-06	-0.023	0.037	0.53	0.00214841	21.0739
PCOS	Prevotella9	rs9613013	G	A	0.0917591	0.0202697	6.1e-06	0.049	0.05	0.33	0.00208888	20.4888
PCOS	Prevotella9	rs7976209	T	C	-0.0870786	0.0197951	7.28e-06	0.052	0.046	0.26	0.00188199	19.3475
PCOS	Prevotella9	rs12648235	T	C	0.0785902	0.0177676	7.39e-06	-0.01	0.047	0.82	0.00190126	19.5613
PCOS	Prevotella9	rs2104588	T	C	0.105558	0.023773	8.13e-06	-0.051	0.054	0.35	0.0021228	19.7117
PCOS	Prevotella9	rs4968431	G	T	0.0640113	0.0144162	8.58e-06	0.028	0.041	0.49	0.00191586	19.7118
PCOS	Prevotella9	rs72815774	T	C	-0.176186	0.0393068	8.78e-06	0.018	0.089	0.84	0.00349529	20.0842
PCOS	Prevotella9	rs7237249	C	T	-0.0823764	0.0182126	8.93e-06	-0.045	0.041	0.28	0.00198786	20.454
PCOS	Prevotella9	rs2495052	A	G	0.0838978	0.0188523	8.97e-06	0.019	0.049	0.7	0.00201889	19.8008
PCOS	Prevotella7	rs57404562	C	A	0.155486	0.0316057	6.22e-07	0.075	0.039	0.055	0.00689285	24.1883
PCOS	Prevotella7	rs9959718	G	A	0.133012	0.0275361	1.9e-06	0.018	0.037	0.62	0.00664324	23.3199
PCOS	Prevotella7	rs9608249	A	G	-0.158213	0.0336317	2.07e-06	0.019	0.045	0.67	0.00631551	22.1176
PCOS	Prevotella7	rs430270	A	C	0.139155	0.0297055	2.87e-06	0.071	0.044	0.1	0.0065703	21.9312
PCOS	Prevotella7	rs2240542	C	T	0.12085	0.0261776	4.84e-06	0.052	0.034	0.13	0.00607137	21.3002
PCOS	Prevotella7	rs2918132	C	T	-0.114648	0.0254916	6.42e-06	0.032	0.038	0.41	0.00605937	20.2153
PCOS	Prevotella7	rs79263163	A	C	-0.143982	0.031501	7.51e-06	-0.013	0.041	0.75	0.00595216	20.8795
PCOS	Prevotella7	rs118038478	A	G	0.205676	0.0468917	7.85e-06	-0.068	0.06	0.26	0.00580483	19.2269
PCOS	Prevotella7	rs12195431	T	C	0.196528	0.0442322	8.73e-06	0.13	0.06	0.028	0.00562626	19.7298
PCOS	Prevotella7	rs12124567	A	G	-0.121281	0.0275017	9.49e-06	0.0038	0.043	0.93	0.00588887	19.4358
PCOS	Prevotella7	rs9426434	T	C	-0.123657	0.0278514	9.72e-06	-0.042	0.037	0.26	0.00590601	19.7007
PCOS	Phascolarctobacterium	rs75882962	T	C	0.0968661	0.0190575	3.19e-07	0.023	0.046	0.61	0.00240644	25.8303
PCOS	Phascolarctobacterium	rs56157888	A	C	0.0954864	0.0193976	1.09e-06	0.026	0.047	0.58	0.00240987	24.227
PCOS	Phascolarctobacterium	rs6427992	G	C	-0.111306	0.0230694	1.87e-06	0.0058	0.031	0.85	0.00202179	22.5097
PCOS	Phascolarctobacterium	rs12618201	A	G	0.0641657	0.0138202	3.38e-06	-0.0024	0.032	0.94	0.001936	21.5526
PCOS	Phascolarctobacterium	rs74540770	G	A	-0.121014	0.0258621	3.6e-06	-0.033	0.061	0.59	0.00232312	21.8905
PCOS	Phascolarctobacterium	rs1264476	T	G	0.0767335	0.0166041	4.3e-06	0.023	0.038	0.55	0.00191966	21.353
PCOS	Phascolarctobacterium	rs74847270	A	G	-0.104889	0.0230998	5.73e-06	0.023	0.055	0.68	0.00185436	20.6142
PCOS	Phascolarctobacterium	rs28525131	G	A	-0.118657	0.0269048	8.23e-06	-0.12	0.068	0.07	0.00185658	19.4466
PCOS	Phascolarctobacterium	rs11929846	T	C	-0.0697199	0.0157969	8.88e-06	0.021	0.039	0.58	0.0017496	19.4756
PCOS	Phascolarctobacterium	rs7982713	G	A	0.0726922	0.0163201	9.72e-06	0.016	0.04	0.69	0.001849	19.8358
PCOS	Peptococcus	rs10031059	T	C	-0.121167	0.0225844	1.24e-07	0.0085	0.038	0.82	0.0051818	28.7734
PCOS	Peptococcus	rs77681628	C	T	0.200307	0.0387328	2.69e-07	-0.047	0.062	0.45	0.00549312	26.7336
PCOS	Peptococcus	rs62424012	G	A	0.137164	0.0292136	1.15e-06	0.11	0.05	0.024	0.0038825	22.0372
PCOS	Peptococcus	rs11001941	G	A	-0.195611	0.0392217	1.33e-06	0.097	0.065	0.13	0.00441654	24.8645
PCOS	Peptococcus	rs2054133	G	A	0.0895433	0.0188332	2.14e-06	-0.013	0.033	0.69	0.00398017	22.5978
PCOS	Peptococcus	rs7033353	T	G	0.090152	0.018995	2.22e-06	0.0047	0.031	0.88	0.00396606	22.5174
PCOS	Peptococcus	rs5770862	T	C	0.162018	0.0356813	3.22e-06	-0.035	0.066	0.6	0.00378197	20.6103
PCOS	Peptococcus	rs7766680	G	C	0.110229	0.0237523	3.3e-06	0.022	0.035	0.52	0.00366569	20.7984
PCOS	Peptococcus	rs72850165	T	C	-0.134304	0.0300423	5.74e-06	0.092	0.057	0.11	0.00353911	19.9782
PCOS	Peptococcus	rs36121075	A	G	-0.14067	0.030628	6.99e-06	-0.032	0.054	0.56	0.00396355	21.0864
PCOS	Peptococcus	rs74592222	G	A	0.137957	0.0302965	8.55e-06	-0.063	0.053	0.23	0.00387588	20.7272
PCOS	Peptococcus	rs12069354	C	T	0.16763	0.03795	9.28e-06	-0.048	0.065	0.47	0.0036323	19.5036
PCOS	Parasutterella	rs2387977	T	C	-0.0681778	0.0134756	5.38e-07	0.034	0.0134756	5.38e-07	0.00225117	25.5927
PCOS	Parasutterella	rs7572229	G	A	0.066273	0.0132736	6.32e-07	-0.0097	0.0132736	6.32e-07	0.00218519	24.9242
PCOS	Parasutterella	rs10899911	A	G	-0.0717102	0.0148151	1.15e-06	-0.002	0.0148151	1.15e-06	0.00205346	23.4247
PCOS	Parasutterella	rs7303158	C	T	0.0646859	0.0134256	1.33e-06	0.0066	0.0134256	1.33e-06	0.00203468	23.2101
PCOS	Parasutterella	rs78383039	T	C	-0.146315	0.0297119	1.57e-06	0.053	0.0297119	1.57e-06	0.00263638	24.2448
PCOS	Parasutterella	rs6828768	C	T	0.0636852	0.0132645	1.78e-06	0.0017	0.0132645	1.78e-06	0.00202043	23.0472
PCOS	Parasutterella	rs55877868	A	C	-0.104458	0.0228089	2.87e-06	0.0054	0.0228089	2.87e-06	0.00197696	20.9696
PCOS	Parasutterella	rs2090816	A	C	0.0840967	0.0177315	2.9e-06	-0.073	0.0177315	2.9e-06	0.00197187	22.4901
PCOS	Parasutterella	rs35055552	T	C	0.109554	0.0235433	3.35e-06	-0.058	0.0235433	3.35e-06	0.00216714	21.649
PCOS	Parasutterella	rs8039785	T	G	0.0618345	0.0133	3.62e-06	0.065	0.0133	3.62e-06	0.00189529	21.6113
PCOS	Parasutterella	rs823424	G	A	-0.0713448	0.0156958	4.95e-06	0.017	0.0156958	4.95e-06	0.00181133	20.6576
PCOS	Parasutterella	rs62273907	A	G	0.229468	0.0502262	5.88e-06	0.075	0.0502262	5.88e-06	0.0056233	20.8617
PCOS	Parasutterella	rs7311004	T	C	-0.0617522	0.0136438	5.92e-06	-0.021	0.0136438	5.92e-06	0.00179621	20.4812
PCOS	Parasutterella	rs11715853	G	A	-0.0662952	0.0146114	6.23e-06	-0.037	0.0146114	6.23e-06	0.00180478	20.5828
PCOS	Parasutterella	rs6809952	G	A	-0.0684957	0.0150892	8.13e-06	0.039	0.0150892	8.13e-06	0.00185681	20.6024
PCOS	Paraprevotella	rs2081023	A	G	-0.122561	0.0236507	2.64e-07	0.013	0.046	0.78	0.00372725	26.8468
PCOS	Paraprevotella	rs9602779	A	C	-0.106692	0.0220264	6.93e-07	0.013	0.041	0.75	0.00325849	23.4561
PCOS	Paraprevotella	rs9900242	A	G	-0.0852967	0.0175212	1.14e-06	-0.0045	0.032	0.89	0.00342294	23.6926
PCOS	Paraprevotella	rs17785622	A	G	0.248065	0.0524304	1.93e-06	-0.14	0.071	0.043	0.00676219	22.3718
PCOS	Paraprevotella	rs140997932	T	C	-0.162376	0.0354178	2.11e-06	0.025	0.065	0.69	0.00338567	21.0115
PCOS	Paraprevotella	rs4767113	C	T	0.0882466	0.018382	2.14e-06	0.031	0.034	0.36	0.00332901	23.0402
PCOS	Paraprevotella	rs4756632	G	T	-0.138905	0.0289897	3.82e-06	-0.05	0.054	0.36	0.00318787	22.9525
PCOS	Paraprevotella	rs145020347	A	G	-0.12465	0.0262323	4.03e-06	-0.049	0.057	0.39	0.00328112	22.5727
PCOS	Paraprevotella	rs3008582	T	C	0.10572	0.0227246	4.36e-06	0.058	0.045	0.2	0.00300742	21.6373
PCOS	Paraprevotella	rs3801748	G	A	0.0779721	0.0171691	5.2e-06	-0.034	0.032	0.29	0.00286465	20.6187
PCOS	Paraprevotella	rs7240324	T	G	-0.10229	0.0226948	5.96e-06	-0.09	0.044	0.04	0.00293556	20.3091
PCOS	Paraprevotella	rs10842464	T	C	-0.0758215	0.0172568	6.6e-06	0.031	0.032	0.33	0.00268223	19.2994
PCOS	Paraprevotella	rs17109926	A	G	-0.0988335	0.0216172	6.75e-06	0.011	0.039	0.77	0.00290325	20.8973
PCOS	Parabacteroides	rs60884758	C	T	-0.0702667	0.0142249	5.71e-07	-0.026	0.041	0.52	0.00140902	24.3978
PCOS	Parabacteroides	rs115602804	G	A	0.10308	0.0222736	1.93e-06	-0.0076	0.073	0.92	0.00130472	21.4149
PCOS	Parabacteroides	rs4236095	G	A	0.0761961	0.0157042	1.93e-06	0.062	0.045	0.17	0.00143489	23.5387
PCOS	Parabacteroides	rs114567323	T	C	0.186478	0.0405199	5.65e-06	-0.093	0.074	0.21	0.00360185	21.1723
PCOS	Parabacteroides	rs7298818	C	T	0.0888832	0.0200902	8.54e-06	0.0022	0.057	0.97	0.00118416	19.5712
PCOS	Parabacteroides	rs6657302	T	C	-0.10452	0.0225521	9.76e-06	0.016	0.065	0.81	0.00129601	21.4768
PCOS	Oxalobacter	rs736744	C	T	0.117882	0.0211262	2.57e-08	0.045	0.032	0.16	0.0066441	31.1218
PCOS	Oxalobacter	rs4428215	G	A	0.130293	0.0242237	7.51e-08	-0.0003	0.036	0.99	0.00617658	28.9183
PCOS	Oxalobacter	rs6000536	C	T	-0.130992	0.0253804	2.06e-07	-0.057	0.039	0.15	0.00569099	26.626
PCOS	Oxalobacter	rs36057338	G	T	0.207847	0.0421439	8.8e-07	0.054	0.06	0.38	0.0056985	24.3116
PCOS	Oxalobacter	rs12002250	A	C	0.217122	0.0466317	1.42e-06	0.18	0.071	0.0092	0.0050199	21.6693
PCOS	Oxalobacter	rs10464997	G	A	0.137691	0.0294804	3.3e-06	0.066	0.045	0.15	0.00466939	21.8051
PCOS	Oxalobacter	rs1569853	T	C	-0.138078	0.0296981	3.65e-06	0.013	0.044	0.77	0.0047892	21.607
PCOS	Oxalobacter	rs11108500	A	G	-0.199099	0.0427327	3.74e-06	0.11	0.078	0.15	0.00501952	21.6979
PCOS	Oxalobacter	rs111966731	T	C	0.213114	0.047162	7.3e-06	-0.023	0.063	0.72	0.00516759	20.4089
PCOS	Oscillospira	rs12206468	G	A	-0.133016	0.0269733	1.04e-06	-0.057	0.058	0.33	0.00253891	24.3134
PCOS	Oscillospira	rs1954532	T	C	-0.0826246	0.0175252	2.27e-06	-0.011	0.04	0.79	0.00225359	22.2232
PCOS	Oscillospira	rs28889936	A	C	0.114051	0.0252838	3.37e-06	0.012	0.058	0.84	0.00208087	20.3433
PCOS	Oscillospira	rs8076323	A	G	0.0715392	0.0156539	5.61e-06	-0.035	0.035	0.32	0.00204481	20.8814
PCOS	Oscillospira	rs72866977	A	C	-0.130569	0.0281674	5.63e-06	0.061	0.065	0.34	0.00235622	21.4828
PCOS	Oscillospira	rs62422654	C	T	0.0898456	0.0198088	6.47e-06	0.034	0.05	0.49	0.00210142	20.5678
PCOS	Oscillospira	rs751183	T	C	-0.0774322	0.0172216	6.85e-06	0.014	0.04	0.73	0.00205007	20.2121
PCOS	Oscillospira	rs12925026	T	C	0.13559	0.030678	9.31e-06	-0.1	0.057	0.072	0.0023766	19.5297
PCOS	Oscillibacter	rs234108	A	G	0.0749553	0.0152632	9.16e-07	0.043	0.031	0.17	0.00276624	24.1109
PCOS	Oscillibacter	rs9393920	A	G	-0.0744662	0.0151081	9.92e-07	-0.012	0.033	0.71	0.00271311	24.2885
PCOS	Oscillibacter	rs11627628	T	C	0.143961	0.0290223	1.01e-06	-0.048	0.062	0.45	0.0028911	24.5992
PCOS	Oscillibacter	rs133832	A	C	-0.0795527	0.0162411	1.15e-06	0.034	0.034	0.32	0.00268076	23.9874
PCOS	Oscillibacter	rs36095275	C	T	-0.0752368	0.0156861	1.4e-06	-0.046	0.033	0.16	0.00263914	23.0001
PCOS	Oscillibacter	rs761240	T	G	-0.17664	0.0388812	2.04e-06	-0.051	0.068	0.45	0.00396481	20.6314
PCOS	Oscillibacter	rs16866406	A	G	0.0988765	0.0208795	3.08e-06	-0.0062	0.044	0.89	0.00250498	22.4206
PCOS	Oscillibacter	rs4506202	A	G	-0.0711323	0.0152261	3.21e-06	-0.042	0.033	0.2	0.00250408	21.8201
PCOS	Oscillibacter	rs61883564	A	G	-0.101351	0.0221016	3.39e-06	0.053	0.049	0.29	0.00234931	21.024
PCOS	Oscillibacter	rs12649930	T	G	0.121589	0.0259612	4.09e-06	0.029	0.054	0.6	0.00248811	21.93
PCOS	Oscillibacter	rs16934185	A	G	-0.129568	0.028157	4.38e-06	-0.091	0.061	0.13	0.0024873	21.1698
PCOS	Oscillibacter	rs11990279	T	C	-0.0824934	0.0180457	4.94e-06	-0.013	0.037	0.73	0.00244444	20.8923
PCOS	Oscillibacter	rs75453768	G	T	0.12212	0.0268629	5.35e-06	-0.15	0.057	0.0087	0.00249696	20.6615
PCOS	Oscillibacter	rs62206502	C	A	-0.0681423	0.0151349	6.6e-06	-0.037	0.032	0.24	0.0022768	20.2664
PCOS	Olsenella	rs62112538	C	T	-0.19943	0.0407033	1.19e-06	-0.13	0.067	0.058	0.00656984	23.993
PCOS	Olsenella	rs17148768	G	A	0.140434	0.0295602	2.2e-06	-0.043	0.04	0.29	0.00614891	22.5576
PCOS	Olsenella	rs72691585	C	A	-0.249079	0.0520814	2.95e-06	-0.02	0.07	0.78	0.00737606	22.8573
PCOS	Olsenella	rs2759329	G	A	-0.111131	0.0237218	3.43e-06	-0.048	0.032	0.13	0.00583552	21.9353
PCOS	Olsenella	rs35225860	A	G	-0.223604	0.0482391	3.87e-06	0.047	0.079	0.55	0.00588422	21.4743
PCOS	Olsenella	rs6046522	C	T	0.122938	0.0269928	4.48e-06	-0.021	0.036	0.57	0.00556758	20.7322
PCOS	Olsenella	rs1035588	A	G	-0.108148	0.0236848	4.86e-06	0.029	0.032	0.35	0.00554536	20.8386
PCOS	Olsenella	rs7540303	C	T	0.108044	0.023638	5.32e-06	0.036	0.031	0.24	0.00555654	20.8808
PCOS	Olsenella	rs61090148	A	G	-0.104783	0.0231343	6.44e-06	-0.031	0.033	0.34	0.00545678	20.5039
PCOS	Olsenella	rs9460691	C	A	0.119966	0.0268645	7.28e-06	0.023	0.038	0.55	0.00530508	19.9308
PCOS	Olsenella	rs8066522	G	A	-0.106529	0.0240379	9.7e-06	0.038	0.034	0.26	0.00522529	19.6295
PCOS	Odoribacter	rs77779484	G	A	-0.133489	0.0268526	6.56e-07	0.05	0.067	0.45	0.00206633	24.7086
PCOS	Odoribacter	rs10093869	A	G	-0.0577795	0.0125389	3.67e-06	0.05	0.035	0.15	0.00149121	21.2308
PCOS	Odoribacter	rs28417404	A	G	-0.0726896	0.0161372	3.68e-06	-0.018	0.046	0.7	0.00137858	20.2876
PCOS	Odoribacter	rs4793970	A	G	-0.0576329	0.0129154	6.03e-06	-0.017	0.035	0.64	0.00135395	19.9098
PCOS	Odoribacter	rs6856150	G	A	0.0881922	0.0194146	6.06e-06	-0.028	0.053	0.59	0.00141164	20.6321
PCOS	Odoribacter	rs10423795	C	T	0.0550695	0.0121164	6.58e-06	-0.029	0.033	0.39	0.0014593	20.6544
PCOS	Odoribacter	rs74553962	T	G	0.121449	0.0264106	9.49e-06	-0.042	0.067	0.53	0.00178839	21.1426
PCOS	Methanobrevibacter	rs76029318	T	C	0.222849	0.0454319	1.08e-06	0.0043	0.059	0.94	0.00705357	24.0459
PCOS	Methanobrevibacter	rs10202904	T	G	-0.112811	0.0239106	3.09e-06	0.0026	0.032	0.93	0.00617426	22.2474
PCOS	Methanobrevibacter	rs894996	C	A	0.214213	0.0456045	3.82e-06	0.057	0.057	0.32	0.00630195	22.0509
PCOS	Methanobrevibacter	rs1334944	T	C	0.115197	0.0255492	7.61e-06	0.01	0.033	0.76	0.00563712	20.318
PCOS	Methanobrevibacter	rs6776814	T	C	-0.188956	0.0419905	8.05e-06	0.083	0.057	0.14	0.00613025	20.2374
PCOS	Methanobrevibacter	rs4802933	A	G	-0.135628	0.0308139	9.74e-06	-0.048	0.044	0.27	0.00537352	19.3627
PCOS	Marvinbryantia	rs2724813	A	G	-0.0840769	0.0167551	6.28e-07	0.011	0.04	0.78	0.00216415	25.1759
PCOS	Marvinbryantia	rs2842896	C	T	-0.0649396	0.0131146	7.25e-07	0.024	0.033	0.47	0.00208967	24.515
PCOS	Marvinbryantia	rs61884471	G	A	0.124426	0.0248431	1.01e-06	-0.042	0.059	0.48	0.00216546	25.0806
PCOS	Marvinbryantia	rs1187983	C	T	-0.0935456	0.0193174	2.02e-06	-0.017	0.051	0.73	0.00196739	23.4463
PCOS	Marvinbryantia	rs2863363	A	G	0.0634861	0.0136323	3.11e-06	0.035	0.033	0.29	0.00181161	21.6844
PCOS	Marvinbryantia	rs72948274	A	C	-0.126354	0.0272212	3.26e-06	0.005	0.066	0.94	0.0018602	21.5421
PCOS	Marvinbryantia	rs3125832	A	C	0.0679323	0.015012	5.03e-06	0.011	0.036	0.77	0.00174581	20.4739
PCOS	Marvinbryantia	rs8006832	G	T	-0.0952415	0.0216699	6.58e-06	0.027	0.052	0.61	0.00168983	19.3136
PCOS	Marvinbryantia	rs146541147	G	A	0.118845	0.0268423	6.86e-06	-0.026	0.071	0.71	0.00181551	19.5995
PCOS	Marvinbryantia	rs11620597	T	C	0.119479	0.0271688	7.8e-06	0.079	0.068	0.24	0.00175013	19.336
PCOS	Lactococcus	rs123059	T	C	-0.13671	0.0274694	1.27e-06	-0.014	0.043	0.75	0.00654429	24.7555
PCOS	Lactococcus	rs10417872	T	G	0.118306	0.024522	1.29e-06	0.0028	0.035	0.94	0.00570582	23.2641
PCOS	Lactococcus	rs2293361	C	T	-0.199221	0.0430969	1.4e-06	0.0013	0.066	0.98	0.00561099	21.3574
PCOS	Lactococcus	rs4766997	C	T	0.114599	0.023839	2.06e-06	-0.028	0.035	0.43	0.00566945	23.0979
PCOS	Lactococcus	rs55910161	C	T	0.146426	0.0307367	2.36e-06	-0.025	0.043	0.55	0.00588141	22.6827
PCOS	Lactococcus	rs7992246	T	C	0.104232	0.0230786	4.45e-06	0.051	0.034	0.13	0.00500264	20.3877
PCOS	Lactococcus	rs6674304	C	T	0.200758	0.0442121	6.18e-06	-0.0093	0.061	0.88	0.00530096	20.608
PCOS	Lactococcus	rs17168302	G	A	0.191857	0.0424761	6.29e-06	0.039	0.066	0.55	0.00504565	20.3915
PCOS	Lactococcus	rs12621813	G	A	0.108423	0.0239978	6.61e-06	0.0036	0.035	0.92	0.00500624	20.4025
PCOS	Lactobacillus	rs921925	A	C	0.0985077	0.0203229	9.72e-07	0.0034	0.038	0.93	0.00336817	23.4879
PCOS	Lactobacillus	rs16861661	G	A	-0.183147	0.038148	1.28e-06	0.0095	0.067	0.89	0.00430983	23.0405
PCOS	Lactobacillus	rs11674854	C	T	-0.0852686	0.0176504	1.59e-06	0.0071	0.033	0.83	0.00349464	23.3314
PCOS	Lactobacillus	rs62314653	C	A	0.187692	0.0394585	2.24e-06	0.097	0.072	0.18	0.00379212	22.6185
PCOS	Lactobacillus	rs7399658	G	A	-0.107134	0.0221883	3.12e-06	-0.1	0.042	0.013	0.003513	23.3063
PCOS	Lactobacillus	rs768253	T	G	-0.079195	0.0171791	4.25e-06	-0.024	0.032	0.45	0.00304499	21.2456
PCOS	Lactobacillus	rs1530559	G	A	0.0804001	0.0178207	4.93e-06	-0.078	0.038	0.04	0.00304921	20.3484
PCOS	Lactobacillus	rs75127669	C	A	0.139784	0.0310414	6.83e-06	-0.077	0.053	0.14	0.00295591	20.2724
PCOS	Lactobacillus	rs77478751	A	G	-0.219886	0.0475759	7.33e-06	-0.05	0.082	0.54	0.0057883	21.3493
PCOS	Lactobacillus	rs12693845	C	T	-0.0805447	0.0177429	8.96e-06	-0.0039	0.036	0.92	0.00295296	20.6016
PCOS	LachnospiraceaeUCG010	rs11192447	A	G	0.126592	0.024345	4.69e-07	-0.0097	0.07	0.89	0.00212538	27.0349
PCOS	LachnospiraceaeUCG010	rs9981767	A	C	0.0655062	0.0131994	9.96e-07	-0.014	0.035	0.69	0.00191809	24.6256
PCOS	LachnospiraceaeUCG010	rs12346653	C	T	0.0657686	0.0139569	2.7e-06	0.036	0.036	0.32	0.00172963	22.2019
PCOS	LachnospiraceaeUCG010	rs74315802	G	T	0.0867262	0.0183477	3.19e-06	-0.1	0.059	0.08	0.00175412	22.3393
PCOS	LachnospiraceaeUCG010	rs10414815	T	C	0.10453	0.0230253	4.24e-06	-0.084	0.059	0.15	0.00177905	20.606
PCOS	LachnospiraceaeUCG010	rs72894957	G	A	0.222263	0.0486425	5.68e-06	0.067	0.073	0.36	0.00481421	20.869
PCOS	LachnospiraceaeUCG010	rs336138	G	T	0.0779543	0.0171865	7.48e-06	0.0042	0.042	0.92	0.00155193	20.5701
PCOS	LachnospiraceaeUCG010	rs4576377	A	C	-0.0572001	0.0127043	7.63e-06	0.043	0.033	0.19	0.00153049	20.2687
PCOS	LachnospiraceaeUCG010	rs17730011	G	A	-0.0702357	0.015706	7.85e-06	-0.0049	0.041	0.91	0.00150973	19.9949
PCOS	LachnospiraceaeUCG010	rs2833528	C	T	-0.0562148	0.0127763	9.92e-06	0.079	0.032	0.015	0.00146082	19.3564
PCOS	LachnospiraceaeUCG008	rs10793103	C	T	0.0974344	0.0181279	9.35e-08	0.03	0.034	0.37	0.00410183	28.8805
PCOS	LachnospiraceaeUCG008	rs67078837	T	C	-0.0845848	0.0170693	7.68e-07	-0.02	0.031	0.53	0.00348777	24.5489
PCOS	LachnospiraceaeUCG008	rs10741777	T	C	-0.0973842	0.0194791	7.69e-07	0.0043	0.036	0.91	0.00355081	24.987
PCOS	LachnospiraceaeUCG008	rs10801803	G	A	-0.117029	0.0243085	1.4e-06	-0.025	0.047	0.59	0.00329222	23.1712
PCOS	LachnospiraceaeUCG008	rs62277846	C	T	0.102292	0.0212319	1.59e-06	-0.01	0.039	0.79	0.00329751	23.2052
PCOS	LachnospiraceaeUCG008	rs955844	A	C	0.112064	0.0228369	1.81e-06	-0.013	0.045	0.77	0.00349641	24.0731
PCOS	LachnospiraceaeUCG008	rs13024781	T	C	-0.0798769	0.0168846	2.29e-06	-0.016	0.031	0.61	0.00317973	22.3738
PCOS	LachnospiraceaeUCG008	rs57091572	A	G	-0.110443	0.0235801	2.86e-06	0.0081	0.044	0.85	0.0031465	21.9309
PCOS	LachnospiraceaeUCG008	rs61944774	A	G	0.179838	0.0393797	6.34e-06	0.035	0.07	0.62	0.00346385	20.8484
PCOS	LachnospiraceaeUCG008	rs57254474	G	A	0.0886511	0.0199045	6.92e-06	0.035	0.037	0.35	0.00281896	19.8309
PCOS	LachnospiraceaeUCG008	rs75356640	G	A	0.136523	0.0303128	9.83e-06	0.0037	0.066	0.95	0.00314814	20.2781
PCOS	LachnospiraceaeUCG004	rs12747809	G	A	-0.062197	0.0125685	8.65e-07	-0.062197	0.033	0.1	0.00169025	24.4858
PCOS	LachnospiraceaeUCG004	rs2882478	G	A	-0.0577091	0.0118338	1.21e-06	-0.0577091	0.032	0.89	0.00164125	23.7781
PCOS	LachnospiraceaeUCG004	rs12673420	G	A	0.0554351	0.0118375	2.98e-06	0.0554351	0.032	0.35	0.00151402	21.9274
PCOS	LachnospiraceaeUCG004	rs12894272	A	G	0.0579792	0.0125229	4.34e-06	0.0579792	0.033	0.27	0.0014799	21.4326
PCOS	LachnospiraceaeUCG004	rs11128180	A	G	0.0648288	0.0140126	4.52e-06	0.0648288	0.038	0.6	0.00147743	21.4011
PCOS	LachnospiraceaeUCG004	rs2444793	C	T	-0.0542433	0.0118188	4.77e-06	-0.0542433	0.031	0.87	0.00145432	21.0615
PCOS	LachnospiraceaeUCG004	rs35182105	A	G	-0.109724	0.024221	4.87e-06	-0.109724	0.073	0.0053	0.00155582	20.519
PCOS	LachnospiraceaeUCG004	rs6656451	C	T	-0.05436	0.011947	5.57e-06	-0.05436	0.031	0.5	0.00142992	20.7005
PCOS	LachnospiraceaeUCG004	rs7629954	A	G	0.108441	0.023825	5.77e-06	0.108441	0.065	0.67	0.00164566	20.7134
PCOS	LachnospiraceaeUCG004	rs233486	A	G	-0.0799088	0.017766	6.28e-06	-0.0799088	0.047	0.68	0.00147344	20.2277
PCOS	LachnospiraceaeUCG004	rs2726805	A	G	0.0548397	0.0120844	6.3e-06	0.0548397	0.035	0.73	0.00142158	20.591
PCOS	LachnospiraceaeUCG004	rs12072562	T	C	0.133104	0.0303566	7.07e-06	0.133104	0.068	0.62	0.0020908	19.2212
PCOS	LachnospiraceaeUCG001	rs437876	T	C	0.0784637	0.0144768	7.17e-08	0.061	0.033	0.062	0.00288584	29.3703
PCOS	LachnospiraceaeUCG001	rs985416	C	T	0.0970258	0.0181807	1.46e-07	-0.01	0.041	0.8	0.0028637	28.4752
PCOS	LachnospiraceaeUCG001	rs2050911	G	A	0.0751466	0.0153934	1.11e-06	-0.074	0.033	0.025	0.00234287	23.8266
PCOS	LachnospiraceaeUCG001	rs573933	T	C	-0.107898	0.0232346	3.11e-06	-0.087	0.057	0.13	0.00212017	21.5612
PCOS	LachnospiraceaeUCG001	rs74034332	G	A	0.168045	0.0382637	3.33e-06	-0.099	0.074	0.18	0.00320218	19.2813
PCOS	LachnospiraceaeUCG001	rs78848836	A	G	-0.118868	0.0259753	3.38e-06	0.0007	0.061	0.99	0.00219814	20.9371
PCOS	LachnospiraceaeUCG001	rs9403580	C	T	0.107801	0.0229777	3.47e-06	-0.015	0.054	0.78	0.00217558	22.006
PCOS	LachnospiraceaeUCG001	rs62496417	T	G	-0.0748504	0.0165681	5.88e-06	0.0025	0.036	0.94	0.00200681	20.4061
PCOS	LachnospiraceaeUCG001	rs4981345	T	C	-0.0681973	0.0149831	6.09e-06	-0.036	0.035	0.3	0.0020755	20.7129
PCOS	LachnospiraceaeUCG001	rs12131224	C	T	0.117095	0.02591	7.4e-06	-0.012	0.056	0.83	0.00210637	20.42
PCOS	LachnospiraceaeUCG001	rs2371284	T	C	-0.0761893	0.0170127	7.56e-06	0.03	0.043	0.48	0.0020094	20.0519
PCOS	LachnospiraceaeUCG001	rs8104225	A	G	0.0892098	0.0197665	8.04e-06	-0.036	0.059	0.54	0.00205158	20.3647
PCOS	LachnospiraceaeUCG001	rs7341608	T	C	-0.0784757	0.0177648	9.48e-06	0.017	0.04	0.68	0.00196389	19.5103
PCOS	LachnospiraceaeNK4A136group	rs954878	A	G	-0.0520656	0.0109082	1.78e-06	0.04	0.031	0.2	0.00132072	22.7795
PCOS	LachnospiraceaeNK4A136group	rs160061	A	G	0.0513831	0.0108094	2.12e-06	0.019	0.032	0.54	0.00130943	22.5936
PCOS	LachnospiraceaeNK4A136group	rs68104925	T	C	-0.0549104	0.0115385	2.37e-06	-0.017	0.032	0.6	0.00131289	22.6443
PCOS	LachnospiraceaeNK4A136group	rs7616165	G	T	-0.230542	0.0483465	2.77e-06	0.072	0.075	0.34	0.00552354	22.7279
PCOS	LachnospiraceaeNK4A136group	rs76193507	A	G	-0.22973	0.0499776	2.93e-06	-0.038	0.073	0.6	0.00587068	21.1175
PCOS	LachnospiraceaeNK4A136group	rs73044693	A	G	-0.10758	0.0229884	3.57e-06	-0.038	0.088	0.66	0.00171162	21.8965
PCOS	LachnospiraceaeNK4A136group	rs7832116	A	G	-0.0714756	0.0151703	3.57e-06	0.039	0.044	0.37	0.00128754	22.1961
PCOS	LachnospiraceaeNK4A136group	rs11263806	A	G	-0.0524615	0.0116758	5.07e-06	-0.014	0.034	0.68	0.00116994	20.1864
PCOS	LachnospiraceaeNK4A136group	rs7073658	T	G	-0.0499621	0.0109693	5.27e-06	-0.051	0.032	0.11	0.00120217	20.7432
PCOS	LachnospiraceaeNK4A136group	rs2880566	T	C	0.0599578	0.0134693	5.61e-06	0.034	0.04	0.4	0.0011486	19.8132
PCOS	LachnospiraceaeNK4A136group	rs12611395	A	G	-0.0902532	0.0199652	5.83e-06	0.041	0.055	0.46	0.00123801	20.4326
PCOS	LachnospiraceaeNK4A136group	rs4955932	T	C	-0.0492283	0.0109388	7.05e-06	0.0081	0.034	0.81	0.00117367	20.2508
PCOS	LachnospiraceaeNK4A136group	rs10952110	G	T	0.0487709	0.0109614	9.08e-06	-0.02	0.032	0.54	0.00117949	19.794
PCOS	LachnospiraceaeNK4A136group	rs28540839	A	C	0.0508285	0.0110591	9.34e-06	0.0006	0.032	0.98	0.00125849	21.1214
PCOS	LachnospiraceaeNK4A136group	rs59805249	T	C	0.0936162	0.0207982	9.45e-06	0.076	0.065	0.24	0.00133159	20.2578
PCOS	LachnospiraceaeND3007group	rs9932954	A	G	-0.0561864	0.0115984	1.25e-06	0.023	0.033	0.5	0.0015393	23.4643
PCOS	LachnospiraceaeND3007group	rs2861203	G	A	0.0572304	0.0127279	7.37e-06	0.047	0.037	0.2	0.00131927	20.2155
PCOS	LachnospiraceaeND3007group	rs72776675	T	C	-0.0647067	0.014797	8.72e-06	-0.026	0.043	0.54	0.00124813	19.1203
PCOS	LachnospiraceaeNC2004group	rs6116753	G	A	0.0994748	0.0209139	2.92e-06	0.011	0.036	0.76	0.00359064	22.616
PCOS	LachnospiraceaeNC2004group	rs12127733	G	A	0.115182	0.0246006	3.11e-06	-0.018	0.04	0.66	0.00350863	21.9146
PCOS	LachnospiraceaeNC2004group	rs3756315	A	G	-0.0883469	0.0188397	3.33e-06	0.019	0.034	0.58	0.00346308	21.9836
PCOS	LachnospiraceaeNC2004group	rs17067076	G	A	-0.154631	0.0352194	5.61e-06	0.037	0.065	0.57	0.00431412	19.268
PCOS	LachnospiraceaeNC2004group	rs12863463	G	A	-0.156365	0.0345372	6.04e-06	-0.13	0.055	0.019	0.00370229	20.4903
PCOS	LachnospiraceaeNC2004group	rs1928659	T	C	0.102522	0.0226445	6.17e-06	0.0057	0.036	0.88	0.00370231	20.4904
PCOS	LachnospiraceaeNC2004group	rs1929743	T	C	0.0837206	0.0190318	9.06e-06	-0.012	0.033	0.71	0.00304771	19.3449
PCOS	LachnospiraceaeNC2004group	rs117467633	T	C	-0.169687	0.0383169	9.13e-06	-0.039	0.078	0.61	0.00384803	19.6042
PCOS	LachnospiraceaeNC2004group	rs12208226	C	A	-0.154739	0.0340372	9.75e-06	0.082	0.059	0.16	0.00366405	20.6603
PCOS	LachnospiraceaeFCS020group	rs7249113	G	A	0.0679483	0.0133496	3.72e-07	-0.0057	0.036	0.87	0.00191058	25.9034
PCOS	LachnospiraceaeFCS020group	rs9788306	C	T	-0.062804	0.0130744	1.39e-06	0.015	0.035	0.66	0.00167265	23.071
PCOS	LachnospiraceaeFCS020group	rs1363769	T	C	-0.200628	0.0449372	1.58e-06	0.02	0.076	0.79	0.00557577	19.9218
PCOS	LachnospiraceaeFCS020group	rs72793667	A	G	-0.116881	0.0246589	1.63e-06	-0.033	0.07	0.63	0.00180913	22.463
PCOS	LachnospiraceaeFCS020group	rs35035870	T	C	-0.190615	0.0414403	2.62e-06	-0.025	0.085	0.77	0.00373604	21.1503
PCOS	LachnospiraceaeFCS020group	rs10093861	G	A	-0.0568869	0.0121152	3.06e-06	-0.021	0.031	0.51	0.00159835	22.0445
PCOS	LachnospiraceaeFCS020group	rs2862811	T	C	0.0564927	0.0121736	3.92e-06	-0.012	0.032	0.71	0.00156125	21.532
PCOS	LachnospiraceaeFCS020group	rs2322265	C	T	-0.0666305	0.0141577	5.21e-06	-0.028	0.037	0.45	0.00160572	22.1463
PCOS	LachnospiraceaeFCS020group	rs1254846	G	A	0.105963	0.0232501	5.6e-06	0.091	0.058	0.12	0.00157441	20.7677
PCOS	LachnospiraceaeFCS020group	rs3999074	G	T	-0.0550587	0.0121847	6.55e-06	0.0041	0.031	0.9	0.00148041	20.4155
PCOS	LachnospiraceaeFCS020group	rs9308097	A	G	0.055381	0.0123659	7.47e-06	0.037	0.032	0.24	0.00147891	20.0541
PCOS	LachnospiraceaeFCS020group	rs4452603	T	G	0.0604208	0.0135965	8.98e-06	-0.0025	0.038	0.95	0.00146208	19.745
PCOS	Lachnospira	rs13157098	A	G	-0.0768058	0.0155312	5.99e-07	-0.034	0.044	0.43	0.00153121	24.4525
PCOS	Lachnospira	rs4923324	G	A	-0.0617321	0.0133387	2.44e-06	0.086	0.037	0.02	0.00129722	21.4163
PCOS	Lachnospira	rs4686798	T	C	0.0531826	0.0113747	2.74e-06	0.048	0.032	0.13	0.00132335	21.8576
PCOS	Lachnospira	rs56791201	T	C	0.051823	0.0110697	2.93e-06	0.052	0.031	0.095	0.00132765	21.9141
PCOS	Lachnospira	rs159484	G	A	0.0794668	0.0176999	6.68e-06	0.027	0.053	0.61	0.00122112	20.1548
PCOS	Lachnospira	rs2520509	A	G	0.0519063	0.011578	7.42e-06	0.02	0.033	0.55	0.00121664	20.0966
PCOS	Lachnoclostridium	rs6112314	A	C	-0.0561715	0.0108174	2.43e-07	0.01	0.033	0.75	0.00150899	26.961
PCOS	Lachnoclostridium	rs62285313	A	G	0.0864203	0.0181565	1.58e-06	-0.065	0.054	0.23	0.00133158	22.6524
PCOS	Lachnoclostridium	rs615997	T	C	0.0511752	0.0106491	2.03e-06	-0.024	0.032	0.45	0.00128771	23.0913
PCOS	Lachnoclostridium	rs78068103	A	G	0.0886199	0.0194248	3.67e-06	0.1	0.066	0.12	0.0011895	20.8113
PCOS	Lachnoclostridium	rs789029	C	T	-0.0641289	0.0137974	3.75e-06	-0.012	0.041	0.76	0.00120393	21.6005
PCOS	Lachnoclostridium	rs4738679	G	A	-0.0520267	0.011404	4.42e-06	0.0055	0.033	0.87	0.00116003	20.8106
PCOS	Lachnoclostridium	rs72829893	G	T	0.117472	0.0268103	5.58e-06	0.0006	0.075	0.99	0.00154538	19.1954
PCOS	Lachnoclostridium	rs1997204	T	C	-0.108075	0.0242022	5.97e-06	-0.0019	0.065	0.98	0.00140844	19.9378
PCOS	Lachnoclostridium	rs1031599	G	T	-0.078627	0.0175644	6.31e-06	-0.077	0.062	0.21	0.00115047	20.0367
PCOS	Lachnoclostridium	rs3821998	C	A	-0.0864066	0.0192519	6.72e-06	-0.055	0.056	0.32	0.00112284	20.1417
PCOS	Lachnoclostridium	rs2385421	A	G	0.0746186	0.0180734	7.14e-06	0.01	0.062	0.87	0.000951206	17.0438
PCOS	Lachnoclostridium	rs12566975	T	C	-0.0468097	0.0105787	9.57e-06	0.069	0.031	0.027	0.00109137	19.5776
PCOS	Lachnoclostridium	rs1528479	G	A	-0.0497798	0.0111919	9.64e-06	-0.04	0.034	0.23	0.00113068	19.781
PCOS	Intestinimonas	rs12226153	A	G	-0.151142	0.0306922	5.12e-07	0.012	0.076	0.88	0.0026804	24.2449
PCOS	Intestinimonas	rs11258178	A	G	0.0660742	0.0134139	6.98e-07	-0.043	0.033	0.2	0.00205793	24.2595
PCOS	Intestinimonas	rs716604	A	G	0.0818068	0.0165992	8.57e-07	-0.023	0.039	0.56	0.00200496	24.2846
PCOS	Intestinimonas	rs4784055	T	C	-0.175324	0.038599	8.72e-07	0.04	0.075	0.59	0.00641998	20.6185
PCOS	Intestinimonas	rs2930225	G	T	0.0729524	0.0152948	1.35e-06	0.025	0.038	0.51	0.00189181	22.7466
PCOS	Intestinimonas	rs2731794	C	T	0.120632	0.0257529	1.92e-06	0.034	0.07	0.62	0.00197657	21.9379
PCOS	Intestinimonas	rs10262702	T	C	0.0918017	0.0194885	2.06e-06	-0.024	0.052	0.64	0.00188234	22.1857
PCOS	Intestinimonas	rs62240188	G	A	0.130074	0.0267179	2.2e-06	0.031	0.069	0.65	0.00230655	23.6968
PCOS	Intestinimonas	rs7170984	T	C	-0.0658116	0.0140767	2.98e-06	-0.059	0.037	0.11	0.00180464	21.8539
PCOS	Intestinimonas	rs1859797	G	A	0.060368	0.0131793	4.12e-06	0.021	0.032	0.51	0.00178004	20.9777
PCOS	Intestinimonas	rs72982915	C	T	0.183158	0.0402743	4.91e-06	0.002	0.073	0.98	0.00368555	20.6748
PCOS	Intestinimonas	rs17067892	C	T	0.107194	0.0250013	6.38e-06	0.0097	0.064	0.88	0.00158988	18.3797
PCOS	Intestinimonas	rs4113676	A	C	-0.218507	0.0490152	7.42e-06	0.015	0.089	0.86	0.00623011	19.8607
PCOS	Intestinimonas	rs2276760	A	G	-0.0685233	0.0152546	7.84e-06	-0.012	0.039	0.75	0.00166744	20.1746
PCOS	Intestinimonas	rs6934519	C	T	0.0692373	0.0151154	8.57e-06	0.034	0.035	0.33	0.00173261	20.9784
PCOS	Intestinimonas	rs62427239	C	A	0.162658	0.0367647	9.41e-06	-0.039	0.082	0.63	0.00305632	19.5683
PCOS	Intestinimonas	rs9823439	T	C	-0.0581947	0.0131455	9.86e-06	-0.036	0.034	0.3	0.00166289	19.5948
PCOS	Intestinibacter	rs10805326	G	A	0.0775151	0.0139665	3.55e-08	-0.017	0.034	0.61	0.00249748	30.7984
PCOS	Intestinibacter	rs4327025	G	A	-0.0810346	0.0154397	1.64e-07	-0.074	0.039	0.054	0.002234	27.5419
PCOS	Intestinibacter	rs16938435	T	C	-0.112189	0.0235439	1.8e-06	0.14	0.056	0.011	0.00184217	22.7023
PCOS	Intestinibacter	rs478972	T	C	-0.142681	0.0297116	1.82e-06	-0.042	0.072	0.56	0.00222682	23.0566
PCOS	Intestinibacter	rs118030283	G	A	-0.151829	0.0324471	2.67e-06	-0.0069	0.068	0.92	0.00247355	21.8907
PCOS	Intestinibacter	rs6875660	C	T	0.0890455	0.0193905	3.06e-06	0.0085	0.052	0.87	0.00171255	21.0851
PCOS	Intestinibacter	rs2702387	A	G	0.0608559	0.0132145	4.26e-06	-0.048	0.033	0.15	0.00172252	21.2046
PCOS	Intestinibacter	rs11109097	C	T	0.0624272	0.0138539	5.49e-06	0.0015	0.034	0.97	0.0017054	20.3016
PCOS	Intestinibacter	rs447950	A	G	0.0628342	0.0136652	5.64e-06	0.026	0.033	0.44	0.00171554	21.1391
PCOS	Intestinibacter	rs9348442	C	T	0.099082	0.0221625	6.26e-06	-0.084	0.056	0.13	0.00162194	19.9839
PCOS	Intestinibacter	rs6062862	A	G	0.0924508	0.0204658	6.68e-06	-0.037	0.051	0.47	0.00167136	20.4029
PCOS	Intestinibacter	rs2098844	C	T	-0.0575295	0.0128416	6.79e-06	-0.0019	0.033	0.95	0.00163023	20.0667
PCOS	Intestinibacter	rs62430350	T	C	0.151096	0.0351476	6.84e-06	-0.0057	0.072	0.94	0.00240992	18.4756
PCOS	Intestinibacter	rs893394	G	A	0.0583322	0.0130729	7.85e-06	0.0021	0.033	0.95	0.00167227	19.9066
PCOS	Intestinibacter	rs68093214	C	T	0.0662258	0.0149877	9.26e-06	0.038	0.036	0.29	0.00163996	19.5213
PCOS	Hungatella	rs13128780	T	C	-0.149725	0.0312777	1.75e-06	0.063	0.045	0.16	0.00569753	22.9035
PCOS	Hungatella	rs72759041	G	T	-0.126025	0.0282242	3.86e-06	-0.04	0.044	0.36	0.00507322	19.9272
PCOS	Hungatella	rs17092615	G	A	0.152235	0.0337867	7.38e-06	-0.0011	0.05	0.98	0.00503854	20.2917
PCOS	Hungatella	rs10044993	C	A	0.139547	0.0316748	8.07e-06	0.026	0.047	0.57	0.00459025	19.4002
PCOS	Hungatella	rs13249325	T	G	-0.100023	0.0225883	9.69e-06	-0.035	0.033	0.28	0.00463693	19.5984
PCOS	Howardella	rs901099	T	G	-0.12718	0.0250924	6.53e-07	-0.0016	0.036	0.97	0.0069947	25.6753
PCOS	Howardella	rs17167098	G	A	-0.169366	0.0352068	1.12e-06	-0.022	0.046	0.63	0.00641201	23.1289
PCOS	Howardella	rs1484873	A	G	-0.227831	0.046335	2.56e-06	0.077	0.066	0.25	0.00665642	24.1639
PCOS	Howardella	rs609430	T	G	-0.112045	0.0239328	3.34e-06	0.06	0.033	0.064	0.00573782	21.9065
PCOS	Howardella	rs672217	G	A	0.164146	0.0349993	3.52e-06	-0.0088	0.049	0.86	0.00605447	21.9837
PCOS	Howardella	rs12452946	A	G	-0.105833	0.0228941	3.8e-06	-0.032	0.032	0.31	0.00559213	21.3584
PCOS	Howardella	rs36081916	T	C	-0.18123	0.0402987	4.7e-06	0.068	0.059	0.25	0.00624939	20.2119
PCOS	Howardella	rs10048062	C	T	-0.147352	0.0336531	8.59e-06	0.037	0.045	0.41	0.00501988	19.1617
PCOS	Howardella	rs3791893	A	G	0.147035	0.034023	9.5e-06	0.075	0.052	0.15	0.00489727	18.6668
PCOS	Howardella	rs2154047	C	A	-0.192557	0.0420093	9.97e-06	-0.0015	0.064	0.98	0.00576564	20.9985
PCOS	Holdemania	rs1867876	T	C	0.0842919	0.0162192	2.74e-07	-0.032	0.036	0.37	0.00295636	27.0034
PCOS	Holdemania	rs9500080	C	T	0.0926764	0.0178886	4.09e-07	0.036	0.039	0.36	0.00293886	26.8343
PCOS	Holdemania	rs6133067	T	C	0.0910829	0.0178561	5.17e-07	0.016	0.06	0.79	0.00292716	26.0137
PCOS	Holdemania	rs77293403	A	G	0.164556	0.0341775	1.77e-06	-0.018	0.072	0.8	0.00304698	23.1758
PCOS	Holdemania	rs116500994	G	T	-0.13755	0.0293386	2.34e-06	-0.018	0.065	0.78	0.00260006	21.9757
PCOS	Holdemania	rs111745969	A	G	0.120677	0.0265781	3.71e-06	0.099	0.058	0.088	0.00243996	20.6974
PCOS	Holdemania	rs9529719	T	C	0.074038	0.0160494	5.97e-06	-0.042	0.034	0.22	0.00233131	21.2762
PCOS	Holdemania	rs80149660	C	T	-0.232987	0.0519183	6.04e-06	0.07	0.071	0.32	0.00609673	20.1261
PCOS	Holdemania	rs11080063	G	A	-0.0665238	0.0149837	6.67e-06	0.019	0.031	0.54	0.00216068	19.7069
PCOS	Holdemania	rs4146507	C	T	0.079488	0.0177002	7.23e-06	-0.016	0.038	0.67	0.00220934	20.1628
PCOS	Holdemania	rs73139538	G	A	-0.148594	0.0327469	7.77e-06	-0.12	0.085	0.16	0.00253711	20.5851
PCOS	Holdemania	rs967319	T	C	0.0788638	0.0176744	8.38e-06	-0.038	0.036	0.29	0.0021812	19.9054
PCOS	Holdemania	rs10885477	T	C	-0.135137	0.0301894	8.6e-06	0.083	0.063	0.19	0.00230047	20.0325
PCOS	Holdemania	rs113593397	A	G	-0.128935	0.0282526	9.36e-06	-0.0002	0.058	1	0.00250417	20.8218
PCOS	Holdemania	rs12701617	A	G	-0.0660617	0.0149427	9.52e-06	-0.0016	0.031	0.96	0.00214183	19.541
PCOS	Holdemanella	rs607782	T	C	-0.0854214	0.0172515	7.19e-07	0.017	0.037	0.65	0.00327754	24.5111
PCOS	Holdemanella	rs73011279	T	C	-0.0961669	0.0199336	1.36e-06	-0.031	0.041	0.45	0.00311185	23.2681
PCOS	Holdemanella	rs75764681	T	C	-0.283103	0.0598999	1.94e-06	0.11	0.081	0.19	0.0073835	22.3227
PCOS	Holdemanella	rs4541991	T	C	-0.0927334	0.0194435	2.1e-06	-0.019	0.038	0.62	0.00296195	22.7411
PCOS	Holdemanella	rs8113760	G	A	0.078999	0.01734	4.62e-06	-0.019	0.042	0.65	0.00277606	20.7504
PCOS	Holdemanella	rs12513188	G	A	0.0903906	0.0195276	4.65e-06	-0.063	0.041	0.12	0.00277492	21.4208
PCOS	Holdemanella	rs34187114	C	A	-0.104505	0.022601	5.13e-06	0.01	0.041	0.8	0.0027676	21.3752
PCOS	Holdemanella	rs62113381	T	C	-0.105447	0.0232029	5.54e-06	0.061	0.048	0.2	0.00281736	20.6474
PCOS	Holdemanella	rs35228298	G	A	0.0934832	0.0202886	7.3e-06	-0.032	0.04	0.42	0.00283938	21.225
PCOS	Holdemanella	rs1926302	G	A	-0.107972	0.0231421	7.5e-06	-0.053	0.049	0.28	0.0028183	21.7622
PCOS	Holdemanella	rs17586763	T	C	-0.227285	0.0510135	7.72e-06	-0.049	0.07	0.48	0.00517363	19.84
PCOS	Haemophilus	rs9382510	C	T	-0.093521	0.0172649	7.12e-08	0.062	0.037	0.091	0.00320808	29.3358
PCOS	Haemophilus	rs111582866	G	A	-0.124265	0.026016	1.27e-06	-0.048	0.063	0.45	0.00271839	22.8095
PCOS	Haemophilus	rs9328464	T	C	0.0723095	0.0148799	1.42e-06	-0.032	0.031	0.31	0.00258296	23.6098
PCOS	Haemophilus	rs78909003	T	C	-0.246256	0.0503924	1.67e-06	-0.022	0.072	0.76	0.00666516	23.867
PCOS	Haemophilus	rs76022354	C	T	0.244638	0.0505504	1.83e-06	0.096	0.076	0.21	0.0064317	23.4076
PCOS	Haemophilus	rs35509	G	A	0.128249	0.0268779	2.01e-06	-0.073	0.061	0.23	0.0026935	22.7622
PCOS	Haemophilus	rs9895850	T	C	-0.192957	0.0416755	2.14e-06	-0.13	0.075	0.093	0.00464659	21.4274
PCOS	Haemophilus	rs4822728	T	C	0.0705861	0.0151388	3.48e-06	0.065	0.032	0.044	0.00237835	21.7351
PCOS	Haemophilus	rs10840326	C	G	0.0948915	0.0203221	4.32e-06	0.0092	0.031	0.77	0.00224532	19.9968
PCOS	Gordonibacter	rs7294633	C	T	0.12867	0.0249946	3.44e-07	0.023	0.034	0.5	0.00706786	26.4867
PCOS	Gordonibacter	rs72714787	C	A	0.181405	0.0377102	1.43e-06	0.0022	0.053	0.97	0.00617727	23.1285
PCOS	Gordonibacter	rs322296	G	A	0.17869	0.037722	4.02e-06	0.048	0.051	0.35	0.0062031	22.4268
PCOS	Gordonibacter	rs16955299	G	A	-0.196423	0.0433538	6.37e-06	0.041	0.056	0.46	0.00571387	20.5157
PCOS	Gordonibacter	rs71545975	A	G	-0.153972	0.0338918	7.04e-06	-0.022	0.043	0.61	0.00577059	20.6277
PCOS	Gordonibacter	rs3765837	T	G	-0.190729	0.0433608	7.17e-06	0.089	0.06	0.14	0.0054115	19.3371
PCOS	Gordonibacter	rs768830	G	A	0.149852	0.0333315	7.76e-06	0.056	0.049	0.25	0.00539976	20.2016
PCOS	Gordonibacter	rs72939513	A	G	-0.21399	0.0490592	7.98e-06	-0.094	0.073	0.2	0.00550832	19.0148
PCOS	Gordonibacter	rs35042269	C	A	-0.180293	0.0403296	8.11e-06	-0.035	0.045	0.44	0.00552842	19.974
PCOS	Gordonibacter	rs61934597	C	T	-0.172495	0.0388567	8.37e-06	-0.056	0.053	0.29	0.00532087	19.6962
PCOS	Gordonibacter	rs13412653	A	C	0.107597	0.0239228	8.61e-06	0.016	0.033	0.63	0.00540424	20.2184
PCOS	Gordonibacter	rs4596722	A	G	0.102908	0.0231571	9.06e-06	-0.013	0.031	0.68	0.00527645	19.7378
PCOS	Fusicatenibacter	rs4378146	A	C	-0.0616691	0.0125259	7.2e-07	0.0034	0.036	0.92	0.0013924	24.2364
PCOS	Fusicatenibacter	rs704418	T	C	0.0739124	0.0151073	7.77e-07	0.012	0.045	0.79	0.00143764	23.9337
PCOS	Fusicatenibacter	rs2132128	G	A	-0.0771914	0.0160344	1.08e-06	0.057	0.05	0.26	0.00133245	23.1729
PCOS	Fusicatenibacter	rs62353480	A	G	-0.0701397	0.0145589	1.57e-06	0.049	0.045	0.28	0.00143783	23.2069
PCOS	Fusicatenibacter	rs2025938	G	A	-0.0967298	0.0205426	2.99e-06	-0.0054	0.059	0.93	0.00141693	22.1695
PCOS	Fusicatenibacter	rs3303	T	C	-0.0953657	0.020407	3.94e-06	-0.086	0.061	0.16	0.00129232	21.8361
PCOS	Fusicatenibacter	rs62187631	T	C	-0.0710571	0.015924	4.55e-06	-0.06	0.045	0.18	0.00120372	19.9094
PCOS	Fusicatenibacter	rs8063430	T	C	-0.104026	0.022217	4.93e-06	-0.019	0.071	0.78	0.00140773	21.9211
PCOS	Fusicatenibacter	rs1864685	A	C	-0.0494799	0.0108105	4.96e-06	-0.0073	0.032	0.82	0.00120433	20.9468
PCOS	Fusicatenibacter	rs60254196	A	G	-0.0492427	0.0109365	5.47e-06	0.016	0.034	0.64	0.00119268	20.2711
PCOS	Fusicatenibacter	rs167879	C	T	-0.0659543	0.0148763	5.87e-06	-0.0021	0.041	0.96	0.00118685	19.6538
PCOS	Fusicatenibacter	rs6515626	G	A	0.141575	0.0313559	7.29e-06	0.0009	0.07	0.99	0.00260813	20.3809
PCOS	Fusicatenibacter	rs9905659	G	A	-0.061617	0.0136576	7.31e-06	-0.073	0.041	0.078	0.00116949	20.3518
PCOS	Fusicatenibacter	rs10439674	A	G	-0.0572129	0.0130007	7.68e-06	0.04	0.04	0.31	0.00111301	19.3645
PCOS	Fusicatenibacter	rs8028026	A	G	-0.0792146	0.0180505	8.06e-06	-0.02	0.05	0.68	0.0011643	19.2566
PCOS	Fusicatenibacter	rs73103914	A	G	-0.0597324	0.0134458	8.3e-06	-0.029	0.038	0.44	0.00113398	19.7333
PCOS	Fusicatenibacter	rs792108	T	C	-0.0508345	0.0113843	8.5e-06	-0.037	0.034	0.28	0.00117302	19.9366
PCOS	Fusicatenibacter	rs206581	A	G	-0.0568339	0.0127894	8.96e-06	-0.012	0.037	0.74	0.00113467	19.7453
PCOS	Flavonifractor	rs12030302	A	G	-0.0692276	0.0137467	5.61e-07	0.022	0.031	0.48	0.00234163	25.356
PCOS	Flavonifractor	rs806808	T	C	0.0667272	0.0136557	1.18e-06	-0.028	0.031	0.38	0.00220573	23.8723
PCOS	Flavonifractor	rs34066017	A	G	0.0764294	0.0159789	1.52e-06	0.064	0.035	0.068	0.00213261	22.8741
PCOS	Flavonifractor	rs11811696	T	C	-0.116063	0.0241012	2.07e-06	-0.064	0.055	0.25	0.00226377	23.1859
PCOS	Flavonifractor	rs114873521	C	T	-0.130067	0.0294087	7.13e-06	-0.0081	0.082	0.92	0.00213181	19.5563
PCOS	FamilyXIIIUCG001	rs12049454	T	C	-0.0647298	0.0134065	1.17e-06	-0.017	0.0134065	1.17e-06	0.00182532	23.3081
PCOS	FamilyXIIIUCG001	rs1426266	T	C	-0.0665521	0.0137151	1.25e-06	0.0047	0.0137151	1.25e-06	0.00184324	23.5429
PCOS	FamilyXIIIUCG001	rs7119679	G	A	-0.0809085	0.0174782	3.52e-06	-0.097	0.0174782	3.52e-06	0.00171891	21.4252
PCOS	FamilyXIIIUCG001	rs76463770	A	G	0.19313	0.0419866	3.77e-06	0.054	0.0419866	3.77e-06	0.00373017	21.1506
PCOS	FamilyXIIIUCG001	rs62414802	C	T	-0.0611904	0.013457	4.29e-06	-0.02	0.013457	4.29e-06	0.00161904	20.673
PCOS	FamilyXIIIUCG001	rs3842897	G	A	-0.112639	0.0242751	5.2e-06	0.11	0.0242751	5.2e-06	0.00173236	21.5272
PCOS	FamilyXIIIUCG001	rs112362903	A	G	-0.149047	0.0333271	7.88e-06	-0.051	0.0333271	7.88e-06	0.00232596	19.9963
PCOS	FamilyXIIIUCG001	rs8076666	A	G	0.088655	0.0198094	8.02e-06	0.056	0.0198094	8.02e-06	0.00163037	20.0259
PCOS	FamilyXIIIAD3011group	rs62200412	C	T	-0.0800851	0.0163834	5.8e-07	-0.03	0.047	0.53	0.00174603	23.8908
PCOS	FamilyXIIIAD3011group	rs16840310	A	G	-0.0608052	0.0122149	6.75e-07	-0.027	0.034	0.43	0.00174191	24.7765
PCOS	FamilyXIIIAD3011group	rs72730932	C	A	-0.0899559	0.0177107	6.89e-07	0.042	0.047	0.37	0.00196516	25.7943
PCOS	FamilyXIIIAD3011group	rs12812672	T	C	-0.096065	0.020828	2.56e-06	0.004	0.056	0.94	0.00156579	21.2701
PCOS	FamilyXIIIAD3011group	rs62029761	A	G	0.128753	0.0276002	3.89e-06	-0.1	0.082	0.21	0.00224885	21.757
PCOS	FamilyXIIIAD3011group	rs16940167	C	T	0.0732552	0.0159898	3.91e-06	0.032	0.042	0.45	0.00147581	20.986
PCOS	FamilyXIIIAD3011group	rs17156849	G	A	-0.112891	0.0245292	4.19e-06	-0.11	0.062	0.071	0.00158385	21.178
PCOS	FamilyXIIIAD3011group	rs11126423	C	T	0.0904399	0.0196301	5.91e-06	-0.017	0.059	0.77	0.00154303	21.2232
PCOS	FamilyXIIIAD3011group	rs149302	T	C	-0.0645635	0.0143225	7.48e-06	0.032	0.037	0.38	0.00142979	20.3178
PCOS	FamilyXIIIAD3011group	rs739451	C	T	0.0649589	0.0147534	7.88e-06	0.016	0.04	0.69	0.00136365	19.3834
PCOS	FamilyXIIIAD3011group	rs9837139	A	G	0.10752	0.0240482	8.71e-06	-0.016	0.064	0.8	0.00147562	19.9872
PCOS	FamilyXIIIAD3011group	rs9276029	A	G	-0.0811384	0.0185669	8.93e-06	-0.016	0.043	0.71	0.00140577	19.0947
PCOS	FamilyXIIIAD3011group	rs11736617	G	A	-0.0759493	0.0172101	9.02e-06	-0.037	0.045	0.41	0.00141151	19.4724
PCOS	Faecalibacterium	rs1271565	C	T	-0.0576251	0.0119649	1.3e-06	0.021	0.042	0.62	0.00131336	23.1929
PCOS	Faecalibacterium	rs6910935	A	G	0.134864	0.0277032	1.38e-06	0.039	0.078	0.62	0.00187142	23.6954
PCOS	Faecalibacterium	rs75499067	C	T	0.227585	0.0465522	1.76e-06	0.046	0.074	0.54	0.00525295	23.8899
PCOS	Faecalibacterium	rs9536330	T	C	-0.048317	0.010797	5.33e-06	-0.077	0.032	0.016	0.00110628	20.0237
PCOS	Faecalibacterium	rs114946999	C	T	-0.0861565	0.01896	5.7e-06	0.065	0.057	0.26	0.00131575	20.6463
PCOS	Faecalibacterium	rs11776390	T	C	-0.078354	0.017183	6.4e-06	0.046	0.059	0.43	0.00124222	20.7907
PCOS	Faecalibacterium	rs10927394	G	T	-0.232262	0.0512364	7.02e-06	-0.067	0.1	0.5	0.00584529	20.5376
PCOS	Faecalibacterium	rs2835874	T	C	-0.0866356	0.0196496	7.54e-06	0.019	0.059	0.74	0.00110537	19.4374
PCOS	Faecalibacterium	rs79656633	T	C	0.145631	0.0323019	8.14e-06	0.087	0.071	0.22	0.00223354	20.3215
PCOS	Faecalibacterium	rs12753492	A	C	0.0641305	0.0149933	8.8e-06	-0.066	0.049	0.18	0.00104285	18.2929
PCOS	Escherichia.Shigella	rs73208162	A	G	-0.119296	0.024839	2.19e-06	0.033	0.08	0.68	0.0020788	23.0623
PCOS	Escherichia.Shigella	rs1154904	A	G	-0.0613376	0.0130644	3.04e-06	0.032	0.031	0.31	0.00183325	22.0395
PCOS	Escherichia.Shigella	rs113127095	A	G	0.151009	0.0323434	3.33e-06	-0.011	0.071	0.88	0.00257829	21.7938
PCOS	Escherichia.Shigella	rs592299	T	C	-0.0592004	0.0129486	4.77e-06	0.009	0.032	0.77	0.00173958	20.8992
PCOS	Escherichia.Shigella	rs113513883	A	G	0.172283	0.038041	5.28e-06	-0.032	0.093	0.73	0.00325541	20.5042
PCOS	Escherichia.Shigella	rs4731451	G	A	-0.0609885	0.0135157	7.47e-06	-0.024	0.032	0.47	0.00169381	20.3585
PCOS	Escherichia.Shigella	rs118526	C	A	-0.0594401	0.013598	8e-06	-0.028	0.032	0.38	0.00160946	19.1045
PCOS	Escherichia.Shigella	rs112767262	T	C	0.0732963	0.0163589	8.21e-06	0.014	0.042	0.74	0.00170257	20.0717
PCOS	Escherichia.Shigella	rs2798105	A	G	0.117362	0.0264533	9.65e-06	0.046	0.054	0.39	0.00182289	20.6253
PCOS	Escherichia.Shigella	rs57024273	T	C	0.0626172	0.0139919	9.7e-06	0.0012	0.038	0.97	0.00168684	20.0246
PCOS	ErysipelotrichaceaeUCG003	rs76502207	T	C	0.144844	0.0289929	6.41e-07	0.05	0.076	0.51	0.00231848	24.9537
PCOS	ErysipelotrichaceaeUCG003	rs28568391	A	G	-0.0583911	0.0118741	6.42e-07	-0.004	0.036	0.91	0.00165993	24.1788
PCOS	ErysipelotrichaceaeUCG003	rs10164067	T	G	-0.10326	0.0212405	1.13e-06	-0.091	0.056	0.11	0.00163549	23.6306
PCOS	ErysipelotrichaceaeUCG003	rs11994308	C	T	0.115417	0.0242503	1.33e-06	-0.01	0.065	0.87	0.00166797	22.6488
PCOS	ErysipelotrichaceaeUCG003	rs59068084	T	G	0.0564772	0.0120224	3.12e-06	0.013	0.033	0.68	0.00151504	22.0651
PCOS	ErysipelotrichaceaeUCG003	rs17798136	G	A	0.158818	0.0347674	3.24e-06	0.086	0.077	0.27	0.00280395	20.861
PCOS	ErysipelotrichaceaeUCG003	rs62403464	T	C	-0.0731743	0.0156516	3.44e-06	-0.038	0.041	0.35	0.0014649	21.8546
PCOS	ErysipelotrichaceaeUCG003	rs75949021	T	C	-0.169667	0.0374238	3.58e-06	-0.073	0.074	0.32	0.00304887	20.548
PCOS	ErysipelotrichaceaeUCG003	rs59104037	A	G	-0.0951263	0.0204742	4.48e-06	0.046	0.057	0.41	0.00145174	21.5838
PCOS	ErysipelotrichaceaeUCG003	rs8053479	A	G	-0.0838212	0.0186509	5.83e-06	-0.014	0.055	0.8	0.00146011	20.195
PCOS	ErysipelotrichaceaeUCG003	rs4758231	G	T	-0.0551754	0.0122047	6.55e-06	0.034	0.034	0.32	0.00137072	20.4353
PCOS	ErysipelotrichaceaeUCG003	rs6875357	C	T	0.165673	0.0353831	6.7e-06	-0.044	0.081	0.59	0.00310713	21.9175
PCOS	ErysipelotrichaceaeUCG003	rs11666127	A	G	-0.0719187	0.0161371	7.9e-06	0.036	0.048	0.44	0.0014359	19.8597
PCOS	ErysipelotrichaceaeUCG003	rs74988980	G	A	-0.133141	0.0348574	8.64e-06	0.029	0.069	0.68	0.00244845	14.5844
PCOS	ErysipelotrichaceaeUCG003	rs12251396	A	G	-0.0705399	0.0158766	9.52e-06	0.017	0.041	0.68	0.00138716	19.7376
PCOS	ErysipelotrichaceaeUCG003	rs73074432	C	T	0.072154	0.0164378	9.99e-06	-0.052	0.044	0.24	0.00135344	19.2652
PCOS	Erysipelatoclostridium	rs7221249	A	G	0.0839861	0.0142741	4.31e-09	-0.013	0.033	0.68	0.00352693	34.6119
PCOS	Erysipelatoclostridium	rs710230	T	C	0.143381	0.0281514	6.33e-07	-0.12	0.06	0.052	0.00286895	25.9352
PCOS	Erysipelatoclostridium	rs4697572	A	G	-0.0810636	0.0163308	7.59e-07	0.072	0.037	0.049	0.00251333	24.6347
PCOS	Erysipelatoclostridium	rs58236560	G	T	-0.111157	0.0234426	2.16e-06	-0.056	0.06	0.34	0.00239428	22.4786
PCOS	Erysipelatoclostridium	rs6474512	A	C	0.067015	0.0143201	3.02e-06	0.054	0.032	0.087	0.0022336	21.8958
PCOS	Erysipelatoclostridium	rs622418	A	G	-0.0668051	0.0143224	3.68e-06	0.0041	0.032	0.9	0.00221895	21.7518
PCOS	Erysipelatoclostridium	rs17804233	T	C	-0.0662914	0.0144203	4.59e-06	0.037	0.031	0.23	0.00215554	21.1289
PCOS	Erysipelatoclostridium	rs16936671	C	T	-0.0968026	0.0217883	6.04e-06	-0.011	0.047	0.82	0.00207611	19.735
PCOS	Erysipelatoclostridium	rs9590927	G	A	-0.0646003	0.0143479	6.39e-06	0.017	0.032	0.59	0.00206806	20.2675
PCOS	Erysipelatoclostridium	rs1434153	G	A	-0.0684526	0.0152443	6.85e-06	-0.041	0.035	0.23	0.00208253	20.1593
PCOS	Erysipelatoclostridium	rs45480394	T	G	-0.0687134	0.0151835	7.66e-06	-0.053	0.034	0.12	0.00212794	20.4761
PCOS	Erysipelatoclostridium	rs2901723	C	A	0.0641339	0.0144295	8.79e-06	-0.037	0.032	0.25	0.00204043	19.7508
PCOS	Erysipelatoclostridium	rs61806970	C	T	0.142548	0.0320688	9.09e-06	0.064	0.067	0.34	0.00228061	19.754
PCOS	Enterorhabdus	rs114731706	T	G	0.182308	0.0382298	2.17e-06	-0.031	0.07	0.66	0.00380363	22.7333
PCOS	Enterorhabdus	rs3017103	A	G	0.0980897	0.0208995	2.94e-06	-0.047	0.041	0.25	0.00291916	22.0222
PCOS	Enterorhabdus	rs73331712	T	C	0.26199	0.055123	4.85e-06	0.027	0.073	0.71	0.00721335	22.5747
PCOS	Enterorhabdus	rs77655283	G	A	0.132988	0.0298306	5.88e-06	0.046	0.065	0.48	0.00264506	19.8694
PCOS	Enterorhabdus	rs10098492	T	C	0.132323	0.0293688	6.41e-06	0.012	0.058	0.83	0.00275021	20.2946
PCOS	Enterorhabdus	rs2051957	C	T	0.0843291	0.0189864	8.9e-06	0.044	0.035	0.22	0.00261507	19.7221
PCOS	Eubacteriumruminantiumgroup	rs2116427	A	G	0.0911461	0.0182353	4.67e-07	-0.048	0.037	0.2	0.00321784	24.9768
PCOS	Eubacteriumruminantiumgroup	rs139749	C	T	-0.0845439	0.0171791	8.59e-07	-0.048	0.035	0.17	0.00330046	24.2129
PCOS	Eubacteriumruminantiumgroup	rs2229917	A	G	0.153538	0.0323922	2.16e-06	0.074	0.066	0.26	0.00317672	22.4609
PCOS	Eubacteriumruminantiumgroup	rs16891896	G	A	-0.174787	0.0390573	2.38e-06	0.0014	0.076	0.99	0.00419586	20.0185
PCOS	Eubacteriumruminantiumgroup	rs10131724	A	C	-0.199832	0.0414577	2.39e-06	-0.039	0.068	0.57	0.00456081	23.2247
PCOS	Eubacteriumruminantiumgroup	rs72836424	C	T	-0.139825	0.030069	2.62e-06	-0.069	0.057	0.23	0.00294777	21.6178
PCOS	Eubacteriumruminantiumgroup	rs7000472	A	G	-0.0762282	0.016523	4.07e-06	0.017	0.031	0.59	0.00274268	21.2785
PCOS	Eubacteriumruminantiumgroup	rs17519472	C	T	0.107804	0.0233984	4.7e-06	-0.072	0.046	0.12	0.00274569	21.222
PCOS	Eubacteriumruminantiumgroup	rs606117	A	G	0.0833243	0.018056	4.82e-06	0.063	0.034	0.06	0.00292357	21.2903
PCOS	Eubacteriumruminantiumgroup	rs57340348	T	C	-0.0979429	0.0212166	4.93e-06	-0.019	0.041	0.64	0.0029052	21.3047
PCOS	Eubacteriumruminantiumgroup	rs73139629	A	C	-0.115098	0.0247909	5.36e-06	-0.0017	0.053	0.97	0.00293843	21.5491
PCOS	Eubacteriumruminantiumgroup	rs11637981	G	T	-0.073258	0.0160888	5.44e-06	-0.013	0.032	0.68	0.00267913	20.7277
PCOS	Eubacteriumruminantiumgroup	rs2418654	C	T	-0.0748879	0.0165852	6.17e-06	-0.04	0.037	0.28	0.00277984	20.3829
PCOS	Eubacteriumruminantiumgroup	rs6676699	G	T	-0.0888124	0.0196447	6.38e-06	-0.038	0.039	0.32	0.00264462	20.4335
PCOS	Eubacteriumruminantiumgroup	rs10923018	G	A	0.0726438	0.0160924	6.8e-06	0.045	0.031	0.14	0.0026262	20.3724
PCOS	Eubacteriumruminantiumgroup	rs13025464	T	C	-0.0737077	0.0163786	6.97e-06	-0.016	0.032	0.6	0.00261042	20.247
PCOS	Eubacteriumruminantiumgroup	rs2817174	C	T	-0.0734306	0.0163687	7.87e-06	0.0074	0.033	0.82	0.00260339	20.1193
PCOS	Eubacteriumruminantiumgroup	rs209813	G	A	-0.103488	0.0236391	9.23e-06	0.078	0.046	0.095	0.00263148	19.1602
PCOS	Eisenbergiella	rs2683098	C	T	0.107319	0.022515	2.24e-06	-0.011	0.038	0.78	0.00405372	22.7118
PCOS	Eisenbergiella	rs3812426	G	A	0.106447	0.0224159	2.72e-06	0.0044	0.037	0.9	0.0040229	22.5425
PCOS	Eisenbergiella	rs1508033	A	C	0.091546	0.0195787	3.23e-06	0.021	0.033	0.53	0.00390284	21.8553
PCOS	Eisenbergiella	rs4462860	G	A	0.0939071	0.0201104	4.16e-06	0.041	0.036	0.26	0.00397769	21.7969
PCOS	Eisenbergiella	rs11027642	C	T	0.129006	0.0284844	4.92e-06	-0.042	0.045	0.35	0.00366052	20.5044
PCOS	Eisenbergiella	rs1553971	T	G	0.120965	0.0263054	5.27e-06	0.065	0.044	0.14	0.00377325	21.1383
PCOS	Eisenbergiella	rs11079158	T	C	0.100627	0.022546	7.35e-06	0.043	0.037	0.25	0.0035559	19.9128
PCOS	Eisenbergiella	rs13258851	A	G	0.137001	0.0302124	7.75e-06	-0.038	0.049	0.43	0.00366957	20.5553
PCOS	Eisenbergiella	rs11938607	T	C	0.0978125	0.0216636	8.22e-06	0.029	0.036	0.42	0.00363813	20.3786
PCOS	Eisenbergiella	rs12257723	A	C	-0.0952742	0.0211569	8.85e-06	0.12	0.035	0.00074	0.00361978	20.2717
PCOS	Eisenbergiella	rs12710729	C	A	0.0893384	0.0199069	9.84e-06	0.0062	0.033	0.85	0.00359448	20.1332
PCOS	Eggerthella	rs2240838	A	G	0.0980582	0.0197653	7.36e-07	-0.0001	0.034	1	0.00475922	24.6033
PCOS	Eggerthella	rs112205261	T	C	-0.188618	0.0403613	3.35e-06	0.03	0.063	0.63	0.00431788	21.8305
PCOS	Eggerthella	rs2223081	G	A	0.102572	0.0221108	3.89e-06	0.0069	0.035	0.85	0.00416372	21.5119
PCOS	Eggerthella	rs3851328	T	G	-0.107774	0.0236527	4.18e-06	-0.011	0.039	0.77	0.0040176	20.754
PCOS	Eggerthella	rs76663501	C	T	0.175349	0.0378576	4.83e-06	0.057	0.074	0.44	0.00443674	21.4448
PCOS	Eggerthella	rs1784446	G	A	0.0907728	0.0198096	5.23e-06	-0.054	0.031	0.084	0.00406292	20.989
PCOS	Eggerthella	rs4985746	G	A	0.110522	0.0247653	5.71e-06	0.028	0.038	0.47	0.00404322	19.9084
PCOS	Eggerthella	rs13070736	A	C	-0.121331	0.0272024	7.62e-06	0.002	0.045	0.96	0.00385035	19.8866
PCOS	Eggerthella	rs6430926	C	T	0.0879736	0.0197127	8.37e-06	-0.05	0.031	0.11	0.0038546	19.9087
PCOS	Eggerthella	rs67490567	T	C	0.108495	0.0245457	8.94e-06	-0.034	0.048	0.48	0.00382895	19.5297
PCOS	Dorea	rs62503162	A	G	-0.0974091	0.0194379	7.47e-07	-0.021	0.056	0.71	0.00154684	25.11
PCOS	Dorea	rs13279148	G	A	0.0715309	0.0150878	2.25e-06	-0.035	0.044	0.42	0.00127511	22.4744
PCOS	Dorea	rs73729431	C	T	-0.13745	0.0299983	3.17e-06	0.0094	0.08	0.91	0.00218302	20.9897
PCOS	Dorea	rs4793307	C	T	0.0574165	0.0122472	4.01e-06	-0.0022	0.035	0.95	0.00124723	21.9762
PCOS	Dorea	rs1899291	C	T	0.0697217	0.0150285	4.57e-06	-0.07	0.047	0.14	0.00122079	21.5208
PCOS	Dorea	rs3005511	A	G	0.0516127	0.0112852	5.29e-06	-0.0034	0.033	0.92	0.00118636	20.9143
PCOS	Dorea	rs11150408	T	G	0.0488254	0.0109063	7.06e-06	-0.052	0.038	0.16	0.00116284	20.0393
PCOS	Dorea	rs3752849	G	A	0.163846	0.036608	7.68e-06	-0.11	0.078	0.15	0.00374984	20.0242
PCOS	Dorea	rs345219	T	G	-0.0497368	0.0112621	8.8e-06	0.062	0.034	0.07	0.00113167	19.5015
PCOS	Dorea	rs12537781	T	C	-0.055544	0.0125223	9.15e-06	-0.037	0.036	0.3	0.00111612	19.6724
PCOS	Dialister	rs11166701	G	A	-0.0655301	0.013186	5.51e-07	0.01	0.031	0.74	0.00210288	24.6934
PCOS	Dialister	rs4753063	G	A	-0.0596297	0.0130052	4.86e-06	0.029	0.031	0.35	0.00175044	21.0194
PCOS	Dialister	rs4747450	C	A	0.0668509	0.0147685	5.84e-06	0.051	0.035	0.14	0.00170642	20.4864
PCOS	Dialister	rs11071887	T	C	0.0662403	0.0146315	5.91e-06	-0.044	0.039	0.26	0.00170664	20.4925
PCOS	Dialister	rs2435610	A	C	0.0647131	0.0143314	5.93e-06	-0.021	0.035	0.55	0.0016985	20.3861
PCOS	Dialister	rs10938938	G	A	-0.0773514	0.0170915	7.37e-06	-0.096	0.039	0.014	0.00179331	20.4786
PCOS	Dialister	rs10138457	T	C	-0.113054	0.0261933	7.88e-06	0.053	0.063	0.4	0.00169561	18.6257
PCOS	Dialister	rs2314294	T	C	0.0865932	0.0193719	8.08e-06	-0.019	0.051	0.71	0.00175907	19.9778
PCOS	Dialister	rs76680460	G	A	-0.161296	0.0364332	8.19e-06	-0.0012	0.089	0.99	0.00272387	19.5944
PCOS	Dialister	rs75416973	A	G	0.0727223	0.016451	9.46e-06	-0.039	0.039	0.31	0.00171091	19.5378
PCOS	Dialister	rs764177	C	A	-0.0601454	0.0135366	9.61e-06	-0.03	0.034	0.37	0.00164409	19.7385
PCOS	Desulfovibrio	rs16863365	A	G	0.109402	0.0226964	1.79e-06	-0.038	0.048	0.42	0.00264056	23.2296
PCOS	Desulfovibrio	rs2853179	C	T	0.0811971	0.0174234	2.42e-06	0.0078	0.038	0.84	0.00242095	21.7128
PCOS	Desulfovibrio	rs13066142	G	A	0.119141	0.0250891	3.79e-06	-0.062	0.058	0.29	0.0024343	22.5453
PCOS	Desulfovibrio	rs6580353	T	C	0.0770979	0.0169735	4.94e-06	0.013	0.038	0.73	0.00222768	20.6275
PCOS	Desulfovibrio	rs4797774	G	A	0.212582	0.0470044	5.64e-06	0.0072	0.088	0.94	0.00584988	20.4421
PCOS	Desulfovibrio	rs12031543	T	C	-0.127185	0.0281887	6.55e-06	-0.13	0.068	0.06	0.00229369	20.3527
PCOS	Desulfovibrio	rs2590913	G	A	0.154496	0.0339396	6.65e-06	-0.067	0.062	0.27	0.0028598	20.7156
PCOS	Desulfovibrio	rs72647089	T	G	-0.106594	0.0239337	8.3e-06	-0.023	0.051	0.65	0.0022028	19.8314
PCOS	Desulfovibrio	rs2032031	A	G	-0.0654931	0.0148681	9.14e-06	0.008	0.032	0.8	0.00209532	19.3993
PCOS	Desulfovibrio	rs7729080	C	A	-0.070287	0.0157691	9.96e-06	0.026	0.033	0.43	0.00214528	19.8628
PCOS	DefluviitaleaceaeUCG011	rs72731813	C	T	-0.147383	0.0293796	4.33e-07	-0.098	0.058	0.091	0.00322957	25.1588
PCOS	DefluviitaleaceaeUCG011	rs4677103	A	G	0.0977912	0.0197263	9.6e-07	0.031	0.045	0.49	0.00306906	24.5696
PCOS	DefluviitaleaceaeUCG011	rs112893842	T	C	0.11381	0.0232806	1.45e-06	0.052	0.048	0.27	0.00291203	23.8929
PCOS	DefluviitaleaceaeUCG011	rs1582238	T	C	0.0805036	0.0167257	1.57e-06	-0.079	0.032	0.013	0.0028936	23.1609
PCOS	DefluviitaleaceaeUCG011	rs55658617	T	C	0.174369	0.0362226	2.15e-06	0.18	0.084	0.035	0.00346579	23.1659
PCOS	DefluviitaleaceaeUCG011	rs9608282	T	G	0.142939	0.0299793	2.52e-06	0.1	0.064	0.12	0.00293758	22.7273
PCOS	DefluviitaleaceaeUCG011	rs9725395	A	G	-0.13834	0.029554	3.52e-06	0.0087	0.059	0.88	0.00272765	21.9055
PCOS	DefluviitaleaceaeUCG011	rs4344384	G	T	0.0715978	0.0156309	4.83e-06	0.0017	0.031	0.96	0.00255838	20.9761
PCOS	DefluviitaleaceaeUCG011	rs2892880	G	A	0.0817755	0.0181686	6.83e-06	-0.023	0.035	0.52	0.00246984	20.2533
PCOS	Coprococcus3	rs8100692	T	C	0.0577411	0.0113476	4.16e-07	-0.0009	0.031	0.98	0.00163305	25.8885
PCOS	Coprococcus3	rs178271	T	C	0.145257	0.0294239	7.81e-07	0.05	0.076	0.51	0.00225275	24.3665
PCOS	Coprococcus3	rs13394391	C	T	-0.0709302	0.0150918	2.2e-06	0.066	0.041	0.11	0.00139311	22.0864
PCOS	Coprococcus3	rs7521171	G	A	-0.0596434	0.0129279	4.32e-06	-0.032	0.054	0.56	0.00137382	21.2822
PCOS	Coprococcus3	rs11080344	C	T	0.0516921	0.0113054	4.79e-06	-0.015	0.032	0.64	0.00131851	20.9036
PCOS	Coprococcus3	rs13247359	G	A	0.051211	0.0113031	7.33e-06	0.034	0.033	0.3	0.00129481	20.5247
PCOS	Coprococcus3	rs10810043	A	G	0.0515518	0.0115923	9.27e-06	0.065	0.034	0.053	0.00124751	19.7739
PCOS	Coprococcus3	rs11077359	T	C	-0.0645443	0.0148833	9.64e-06	-0.025	0.05	0.61	0.00122148	18.8044
PCOS	Coprococcus1	rs4277593	G	A	-0.0585649	0.0109914	1.14e-07	-0.081	0.032	0.011	0.00170213	28.387
PCOS	Coprococcus1	rs74101919	T	C	-0.0718989	0.0144651	1.03e-06	-0.0019	0.042	0.96	0.00147439	24.7029
PCOS	Coprococcus1	rs56405618	A	G	-0.08963	0.0186508	1.57e-06	-0.14	0.051	0.0063	0.00140803	23.0918
PCOS	Coprococcus1	rs1010560	C	A	0.0580232	0.0122722	1.96e-06	-0.067	0.035	0.057	0.00133496	22.3517
PCOS	Coprococcus1	rs73031725	T	C	0.167591	0.0355224	1.98e-06	-0.024	0.079	0.77	0.00307938	22.2524
PCOS	Coprococcus1	rs1576241	A	G	-0.0510343	0.0109535	3.33e-06	0.039	0.031	0.21	0.00129595	21.7056
PCOS	Coprococcus1	rs12794898	G	T	0.0903299	0.0197212	4.92e-06	0.037	0.059	0.53	0.0013796	20.9767
PCOS	Coprococcus1	rs2907920	A	G	0.0561173	0.0126824	7.65e-06	0.047	0.039	0.23	0.00121915	19.5766
PCOS	Coprococcus1	rs1762123	C	T	-0.0891532	0.0198554	8.01e-06	0.0063	0.072	0.93	0.00120407	20.1588
PCOS	Coprococcus1	rs73167075	T	C	0.0573137	0.0127573	8.57e-06	0.021	0.036	0.56	0.00120476	20.1812
PCOS	Coprococcus1	rs946513	C	T	0.205899	0.0460018	8.62e-06	0.0005	0.08	1	0.00462666	20.0243
PCOS	Coprococcus1	rs1519491	T	C	0.0499197	0.0113558	8.95e-06	-0.041	0.033	0.21	0.00115355	19.3223
PCOS	Coprobacter	rs305411	A	G	0.129218	0.0264518	1.01e-06	0.069	0.055	0.21	0.00350893	23.8567
PCOS	Coprobacter	rs213863	C	T	-0.0887412	0.0188377	2.35e-06	-0.008	0.035	0.82	0.00325385	22.1853
PCOS	Coprobacter	rs3828477	G	T	-0.091218	0.019569	2.89e-06	-0.014	0.036	0.69	0.00318606	21.7217
PCOS	Coprobacter	rs143662916	C	T	0.253264	0.0540141	3.07e-06	0.037	0.069	0.59	0.00708064	21.971
PCOS	Coprobacter	rs72821405	T	C	-0.147365	0.0319978	4.76e-06	0.16	0.06	0.007	0.00342203	21.2036
PCOS	Coprobacter	rs11532348	C	T	-0.103931	0.0226826	5.71e-06	-0.02	0.042	0.64	0.00328806	20.9876
PCOS	Coprobacter	rs74919520	G	A	0.125703	0.0276296	5.76e-06	-0.05	0.047	0.29	0.00323028	20.6922
PCOS	Coprobacter	rs12684609	T	C	0.100827	0.0220366	6.1e-06	0.01	0.041	0.81	0.00327873	20.9279
PCOS	Coprobacter	rs189356	G	A	0.0781125	0.0171916	6.26e-06	-0.035	0.032	0.28	0.00304329	20.6385
PCOS	Coprobacter	rs12996055	A	C	0.0921817	0.0209405	8.08e-06	0.0098	0.037	0.79	0.00294084	19.3724
PCOS	Coprobacter	rs28402691	T	C	0.110695	0.0251199	9.56e-06	-0.0017	0.049	0.97	0.00303115	19.4127
PCOS	Collinsella	rs9541268	C	A	0.09597	0.0197312	8.79e-07	0.046	0.054	0.39	0.00182855	23.6535
PCOS	Collinsella	rs73052258	G	A	0.0930178	0.0202658	1.72e-06	-0.076	0.054	0.16	0.00146757	21.0641
PCOS	Collinsella	rs2103510	G	A	0.0786551	0.0168217	2.42e-06	0.029	0.046	0.54	0.00152295	21.8602
PCOS	Collinsella	rs75672793	A	G	-0.108908	0.0240522	6.14e-06	0.061	0.054	0.26	0.00162443	20.4995
PCOS	Collinsella	rs10890671	T	C	-0.0537401	0.0118848	6.52e-06	0.001	0.031	0.97	0.00142438	20.4433
PCOS	Collinsella	rs1496626	T	C	-0.0722307	0.01616	6.78e-06	0.035	0.044	0.43	0.00139183	19.9755
PCOS	Collinsella	rs62448871	C	A	-0.0540309	0.0120324	6.78e-06	0.009	0.032	0.78	0.00140476	20.1613
PCOS	Collinsella	rs149807560	C	A	-0.104264	0.0235841	7.1e-06	0.027	0.067	0.68	0.00144857	19.5419
PCOS	Collinsella	rs11597285	G	T	-0.0537947	0.0120548	9.38e-06	0.019	0.032	0.56	0.00138734	19.911
PCOS	Clostridiumsensustricto1	rs550843	T	C	-0.0783246	0.0169209	2.05e-06	0.068	0.046	0.14	0.00151708	21.4233
PCOS	Clostridiumsensustricto1	rs2795528	G	A	-0.184315	0.0392204	2.72e-06	-0.032	0.068	0.64	0.0034572	22.078
PCOS	Clostridiumsensustricto1	rs2817172	C	T	0.058139	0.0124492	2.77e-06	0.013	0.033	0.7	0.0015943	21.8065
PCOS	Clostridiumsensustricto1	rs115807074	A	G	-0.22736	0.0492575	4.32e-06	0.02	0.093	0.83	0.00501259	21.295
PCOS	Clostridiumsensustricto1	rs116847295	C	T	0.110021	0.0246032	4.58e-06	-0.0044	0.065	0.95	0.00154659	19.9943
PCOS	Clostridiumsensustricto1	rs12341505	G	A	0.0810718	0.0180121	4.82e-06	-0.039	0.047	0.4	0.00143289	20.2558
PCOS	Clostridiumsensustricto1	rs11264403	G	A	-0.139062	0.0334454	7.76e-06	0.0032	0.073	0.97	0.00236745	17.2831
PCOS	ChristensenellaceaeR	rs62467127	C	T	0.114108	0.0251983	3.25e-06	0.075	0.069	0.28	0.00160968	20.5033
PCOS	ChristensenellaceaeR	rs17081797	A	G	-0.0904325	0.0204253	3.34e-06	0.036	0.056	0.51	0.0011994	19.6001
PCOS	ChristensenellaceaeR	rs892686	A	G	0.0514099	0.011136	3.97e-06	0.023	0.031	0.46	0.00130382	21.31
PCOS	ChristensenellaceaeR	rs78521377	C	T	0.124992	0.0274797	5.61e-06	-0.063	0.07	0.37	0.00163864	20.6857
PCOS	ChristensenellaceaeR	rs62132810	A	G	-0.0828853	0.0179623	5.67e-06	-0.088	0.07	0.2	0.00141131	21.29
PCOS	ChristensenellaceaeR	rs10461257	A	G	-0.0551969	0.0122069	6.51e-06	-0.011	0.042	0.78	0.00127731	20.4439
PCOS	ChristensenellaceaeR	rs60954665	T	G	0.049815	0.0110787	7.13e-06	0.014	0.031	0.65	0.00123702	20.2156
PCOS	ChristensenellaceaeR	rs73952017	C	T	-0.0862164	0.0194354	8.46e-06	-0.016	0.058	0.79	0.00128671	19.676
PCOS	ChristensenellaceaeR	rs62190261	A	C	0.0958394	0.0214723	8.74e-06	-0.0073	0.068	0.91	0.00130261	19.9193
PCOS	ChristensenellaceaeR	rs79150079	C	A	0.121547	0.0270977	9.42e-06	0.099	0.063	0.12	0.00167466	20.1163
PCOS	Catenibacterium	rs12404911	C	T	0.140717	0.0304142	2.8e-06	0.043	0.04	0.28	0.00656552	21.3931
PCOS	Catenibacterium	rs212393	G	A	-0.135254	0.0286209	3.62e-06	-0.038	0.035	0.27	0.0068476	22.3185
PCOS	Catenibacterium	rs77285108	G	A	-0.161826	0.0353447	3.63e-06	-0.0036	0.044	0.94	0.0064881	20.9497
PCOS	Catenibacterium	rs73128290	A	G	0.129726	0.0284563	4.29e-06	-0.0024	0.036	0.95	0.00637546	20.7698
PCOS	Catenibacterium	rs7742829	C	T	0.11411	0.0251099	5.61e-06	0.031	0.031	0.33	0.0063356	20.6391
PCOS	Butyrivibrio	rs7752361	A	G	-0.11923	0.0239975	7.69e-07	-0.016	0.031	0.62	0.00704156	24.6713
PCOS	Butyrivibrio	rs72723662	C	T	0.224078	0.0449336	7.86e-07	0.0061	0.066	0.93	0.00802773	24.8527
PCOS	Butyrivibrio	rs16941336	C	T	0.127488	0.0267936	1.53e-06	0.009	0.035	0.8	0.00645996	22.6268
PCOS	Butyrivibrio	rs4537857	T	C	-0.12459	0.0260992	1.8e-06	0.0093	0.034	0.79	0.00650203	22.7752
PCOS	Butyrivibrio	rs11761679	T	C	0.154775	0.0321539	2.2e-06	0.029	0.042	0.5	0.00661038	23.1572
PCOS	Butyrivibrio	rs74622183	A	G	-0.201027	0.0428204	2.46e-06	-0.008	0.065	0.9	0.00629702	22.0272
PCOS	Butyrivibrio	rs7763512	G	A	0.119846	0.0253367	3.11e-06	-0.04	0.033	0.22	0.0068185	22.3603
PCOS	Butyrivibrio	rs17163238	G	A	0.140987	0.0309117	5.51e-06	-0.0028	0.039	0.94	0.00593876	20.7904
PCOS	Butyrivibrio	rs9349693	A	G	0.117973	0.0259861	5.55e-06	0.039	0.033	0.24	0.00588424	20.5984
PCOS	Butyrivibrio	rs486484	A	G	-0.108349	0.0240008	6.61e-06	-0.0025	0.032	0.94	0.00586231	20.3678
PCOS	Butyrivibrio	rs77356209	T	C	0.216874	0.0483299	6.66e-06	-0.05	0.065	0.45	0.00592401	20.1246
PCOS	Butyrivibrio	rs142855850	A	G	0.205013	0.0457138	6.86e-06	-0.064	0.07	0.36	0.00618069	20.1002
PCOS	Butyrivibrio	rs1007475	G	T	0.118065	0.0261271	7.92e-06	-0.032	0.034	0.34	0.00583036	20.4086
PCOS	Butyrivibrio	rs4928024	A	G	-0.17471	0.0389333	8.19e-06	-0.11	0.05	0.028	0.00575155	20.1254
PCOS	Butyrivibrio	rs16934069	T	C	-0.133784	0.0299444	8.86e-06	-0.059	0.041	0.14	0.00569991	19.9494
PCOS	Butyricimonas	rs113054641	G	A	-0.144881	0.0274574	1.74e-07	-0.028	0.062	0.66	0.00279069	27.8367
PCOS	Butyricimonas	rs62390301	T	C	-0.0872983	0.0174893	7.42e-07	-0.062	0.043	0.15	0.00233752	24.9107
PCOS	Butyricimonas	rs7083431	A	C	0.0703539	0.0144439	8.85e-07	-0.027	0.033	0.42	0.0022048	23.7208
PCOS	Butyricimonas	rs62130338	G	A	-0.0732608	0.0158324	3.9e-06	0.014	0.039	0.73	0.00202409	21.4076
PCOS	Butyricimonas	rs78453362	A	G	-0.14948	0.0327073	4.06e-06	0.12	0.075	0.12	0.00253858	20.882
PCOS	Butyricimonas	rs9657374	C	T	0.0680719	0.0148172	4.5e-06	0.024	0.035	0.49	0.00196185	21.1018
PCOS	Butyricimonas	rs1862649	G	A	0.113124	0.0248176	4.76e-06	-0.084	0.054	0.12	0.00204828	20.7732
PCOS	Butyricimonas	rs71428626	G	T	-0.133188	0.0289905	4.8e-06	-0.063	0.065	0.34	0.00215438	21.1024
PCOS	Butyricimonas	rs12458763	A	C	-0.0694173	0.0150795	5.38e-06	0.057	0.062	0.35	0.00196972	20.488
PCOS	Butyricimonas	rs11228830	A	G	0.122037	0.0269587	6.37e-06	0.076	0.066	0.25	0.00228434	20.542
PCOS	Butyricimonas	rs12304031	G	A	0.135265	0.0298411	6.55e-06	0.0026	0.048	0.96	0.00179924	19.2072
PCOS	Butyricimonas	rs2114713	G	T	-0.086278	0.0196846	6.7e-06	0.051	0.031	0.1	0.00189333	20.3577
PCOS	Butyricimonas	rs72814525	A	G	0.0664154	0.0149766	8.25e-06	0.0002	0.034	1	0.0018284	19.662
PCOS	Butyricicoccus	rs56221232	T	C	0.0828027	0.0167401	7.62e-07	0.061	0.049	0.21	0.00142601	24.4638
PCOS	Butyricicoccus	rs2017189	G	T	-0.0506956	0.011024	3.87e-06	0.015	0.032	0.63	0.0012328	21.1451
PCOS	Butyricicoccus	rs7322368	T	C	0.0815733	0.0183167	5.52e-06	0.036	0.052	0.49	0.00115623	19.8314
PCOS	Butyricicoccus	rs12585793	T	C	-0.262206	0.0564729	5.79e-06	0.12	0.083	0.14	0.00682955	21.5441
PCOS	Butyricicoccus	rs62478070	T	G	0.224039	0.0494959	5.94e-06	0.022	0.095	0.81	0.00508716	20.4782
PCOS	Butyricicoccus	rs4962426	G	T	0.0614216	0.0135979	7.38e-06	0.013	0.042	0.75	0.00120662	20.4007
PCOS	Butyricicoccus	rs10084203	A	G	0.0549699	0.0123563	8.59e-06	0.0024	0.036	0.95	0.00115369	19.789
PCOS	Butyricicoccus	rs12034718	A	G	0.0701199	0.0158214	9.58e-06	0.0065	0.043	0.88	0.00120827	19.64
PCOS	Blautia	rs67794373	C	T	0.0601709	0.0123443	1e-06	0.023	0.037	0.54	0.00130679	23.7571
PCOS	Blautia	rs11149971	C	T	0.117605	0.02339	1.04e-06	-0.019	0.068	0.78	0.00155285	25.2777
PCOS	Blautia	rs12453000	C	T	0.0625335	0.0129987	1.26e-06	0.062	0.045	0.17	0.0012974	23.1406
PCOS	Blautia	rs72973581	A	G	0.125169	0.0265408	1.74e-06	-0.075	0.075	0.32	0.0017395	22.2381
PCOS	Blautia	rs7860714	A	G	-0.0502178	0.0109853	4.09e-06	-0.014	0.036	0.71	0.00114929	20.8952
PCOS	Blautia	rs682885	A	G	-0.0493376	0.0107359	4.49e-06	-0.028	0.031	0.37	0.00115437	21.117
PCOS	Blautia	rs4926264	T	C	0.0826207	0.0178239	5.1e-06	0.0061	0.061	0.92	0.0011743	21.4844
PCOS	Blautia	rs115043014	G	A	-0.206605	0.043992	5.19e-06	-0.2	0.084	0.017	0.00447934	22.0475
PCOS	Blautia	rs3005511	A	G	0.0501085	0.0110768	6.19e-06	-0.0034	0.033	0.92	0.00111848	20.4621
PCOS	Blautia	rs113271346	C	T	0.0782682	0.0172116	6.85e-06	0.037	0.049	0.45	0.00118262	20.6765
PCOS	Blautia	rs2788271	T	G	-0.0575596	0.0133492	7.16e-06	0.036	0.04	0.37	0.00101626	18.59
PCOS	Blautia	rs16892041	T	C	-0.0622605	0.0141804	8.82e-06	0.092	0.04	0.022	0.00105368	19.2753
PCOS	Blautia	rs117001700	T	C	0.196414	0.0441122	8.84e-06	0.049	0.081	0.54	0.00397721	19.8177
PCOS	Bilophila	rs1571225	C	T	0.0826826	0.0170621	1.12e-06	0.039	0.046	0.4	0.0018236	23.4797
PCOS	Bilophila	rs7802841	C	A	0.0670097	0.0137701	1.77e-06	-0.017	0.035	0.62	0.00183865	23.6775
PCOS	Bilophila	rs3827020	C	T	0.0766479	0.0160642	1.79e-06	0.044	0.048	0.36	0.00179955	22.7621
PCOS	Bilophila	rs6793291	C	A	0.112729	0.0241633	3.11e-06	-0.073	0.062	0.24	0.00196564	21.7611
PCOS	Bilophila	rs1241171	G	A	-0.0692654	0.0150148	4.24e-06	0.029	0.037	0.45	0.0016526	21.2777
PCOS	Bilophila	rs542415	T	C	-0.0613623	0.0133436	4.71e-06	-0.025	0.034	0.46	0.00165238	21.1441
PCOS	Bilophila	rs72676854	T	C	0.123209	0.026882	5.62e-06	-0.035	0.065	0.59	0.00180517	21.0031
PCOS	Bilophila	rs2728491	G	T	-0.0627416	0.0139456	6.33e-06	-0.027	0.034	0.43	0.00157197	20.2379
PCOS	Bilophila	rs4798126	G	A	0.073288	0.016799	7.15e-06	-0.017	0.049	0.72	0.00148739	19.0297
PCOS	Bilophila	rs11069458	T	C	-0.0680947	0.015503	7.72e-06	-0.024	0.041	0.55	0.00149843	19.2898
PCOS	Bilophila	rs60178956	G	A	-0.0624818	0.0141485	8.06e-06	0.066	0.037	0.077	0.00152403	19.4993
PCOS	Bilophila	rs1969927	G	A	0.0564589	0.0126935	9.07e-06	-0.0085	0.033	0.8	0.00154597	19.7804
PCOS	Bilophila	rs9899990	A	G	-0.102702	0.0233878	9.07e-06	-0.014	0.059	0.81	0.0015927	19.2801
PCOS	Bifidobacterium	rs182549	C	T	0.119703	0.0127294	1.28e-20	-0.039	0.039	0.31	0.0059483	88.418
PCOS	Bifidobacterium	rs7322849	T	C	0.112428	0.0201813	1.08e-08	0.0045	0.068	0.95	0.0020957	31.0311
PCOS	Bifidobacterium	rs62181700	G	A	-0.0624643	0.0131205	2.17e-06	-0.033	0.036	0.37	0.00153179	22.6622
PCOS	Bifidobacterium	rs56108664	T	C	0.0729971	0.0157926	2.44e-06	-0.081	0.042	0.053	0.00153294	21.362
PCOS	Bifidobacterium	rs857444	C	T	0.0558234	0.0121219	3.57e-06	-0.025	0.034	0.46	0.00143311	21.2047
PCOS	Bifidobacterium	rs73797465	T	G	-0.0953566	0.0209236	4.38e-06	-0.053	0.066	0.42	0.00141417	20.7667
PCOS	Bifidobacterium	rs75344046	C	T	0.232354	0.0505979	4.86e-06	0.024	0.086	0.78	0.00543914	21.0771
PCOS	Bifidobacterium	rs540489	T	G	-0.0637641	0.0138746	5.19e-06	0.03	0.041	0.47	0.00144841	21.118
PCOS	Bifidobacterium	rs55888705	A	G	0.0546319	0.0121139	6.67e-06	-0.035	0.037	0.35	0.0013745	20.3362
PCOS	Bifidobacterium	rs2686790	T	C	0.070741	0.0157926	7.5e-06	0.081	0.045	0.072	0.00135591	20.0621
PCOS	Bifidobacterium	rs12022129	G	A	0.0619356	0.0138937	8e-06	0.0061	0.038	0.87	0.00134308	19.8693
PCOS	Bifidobacterium	rs2491158	G	A	0.0712624	0.015983	8.05e-06	0.013	0.041	0.75	0.00141583	19.8766
PCOS	Bifidobacterium	rs5746486	T	C	-0.0536216	0.0120801	9e-06	-0.011	0.032	0.74	0.00133152	19.7008
PCOS	Barnesiella	rs2276875	A	G	-0.0697176	0.0139537	4.65e-07	0.048	0.041	0.24	0.00179362	24.9599
PCOS	Barnesiella	rs2428166	G	A	-0.165859	0.0337309	8.51e-07	0.049	0.079	0.53	0.00297936	24.172
PCOS	Barnesiella	rs60316894	C	T	-0.121478	0.025184	1.19e-06	0.013	0.079	0.87	0.00182629	23.2637
PCOS	Barnesiella	rs13242616	T	C	-0.0583747	0.0123176	2.29e-06	-0.0047	0.037	0.9	0.00160798	22.4562
PCOS	Barnesiella	rs35177866	A	G	0.0917125	0.0190133	2.95e-06	0.071	0.056	0.2	0.00173411	23.2635
PCOS	Barnesiella	rs199035	G	A	0.0559495	0.0119716	3e-06	0.0062	0.032	0.85	0.00156384	21.8388
PCOS	Barnesiella	rs77455852	T	G	-0.0891491	0.0195601	3.16e-06	-0.0053	0.061	0.93	0.0015485	20.7696
PCOS	Barnesiella	rs79795328	A	G	-0.0818645	0.0176441	4.23e-06	0.041	0.044	0.36	0.00157382	21.5243
PCOS	Barnesiella	rs62251337	A	G	-0.0690763	0.0149374	4.24e-06	0.027	0.039	0.49	0.00153117	21.3818
PCOS	Barnesiella	rs12909713	C	T	-0.0550716	0.0120039	4.95e-06	0.066	0.031	0.035	0.00147954	21.045
PCOS	Barnesiella	rs72684847	T	C	-0.114369	0.0253873	6.76e-06	-0.011	0.064	0.86	0.00156062	20.2917
PCOS	Barnesiella	rs76181748	C	T	-0.0778559	0.017164	6.78e-06	-0.037	0.046	0.43	0.00144677	20.5724
PCOS	Barnesiella	rs113258194	A	G	0.098992	0.0214121	7.31e-06	0.017	0.058	0.78	0.00153038	21.3708
PCOS	Barnesiella	rs11155559	T	C	0.0956023	0.0212961	8.92e-06	0.052	0.056	0.35	0.00150359	20.1499
PCOS	Eubacteriumventriosumgroup	rs11617697	A	G	-0.143349	0.0286241	7.22e-07	0.015	0.084	0.86	0.00217667	25.0754
PCOS	Eubacteriumventriosumgroup	rs57199565	T	C	0.0783394	0.0160257	7.97e-07	0.086	0.067	0.2	0.0015998	23.8929
PCOS	Eubacteriumventriosumgroup	rs73615400	T	C	-0.0956303	0.0193428	9.54e-07	0.011	0.058	0.85	0.00161122	24.4398
PCOS	Eubacteriumventriosumgroup	rs16884680	G	T	-0.0906428	0.0191909	1.74e-06	0.034	0.059	0.56	0.00145701	22.3059
PCOS	Eubacteriumventriosumgroup	rs12964517	G	A	0.0587198	0.0123453	2.07e-06	0.017	0.033	0.6	0.00147755	22.6207
PCOS	Eubacteriumventriosumgroup	rs876734	C	T	-0.0618696	0.0132532	2.89e-06	0.046	0.038	0.22	0.00145919	21.7898
PCOS	Eubacteriumventriosumgroup	rs78250280	G	A	0.0749762	0.0164404	3.36e-06	-0.084	0.05	0.094	0.00139999	20.7951
PCOS	Eubacteriumventriosumgroup	rs3809430	T	C	-0.0548171	0.0118426	3.55e-06	-0.017	0.032	0.59	0.00139962	21.4232
PCOS	Eubacteriumventriosumgroup	rs73849225	T	C	0.0975711	0.0224388	5.21e-06	-0.068	0.059	0.25	0.00129578	18.9053
PCOS	Eubacteriumventriosumgroup	rs35179274	C	T	-0.0627263	0.013786	5.76e-06	-0.015	0.037	0.69	0.00135243	20.6999
PCOS	Eubacteriumventriosumgroup	rs66746423	C	T	0.0751501	0.0164978	6.11e-06	0.0065	0.045	0.88	0.00142131	20.7465
PCOS	Eubacteriumventriosumgroup	rs72783037	C	A	0.0658926	0.0143747	6.55e-06	0.058	0.041	0.16	0.00137273	21.0097
PCOS	Eubacteriumventriosumgroup	rs6704822	A	G	0.0739179	0.0166705	6.62e-06	0.01	0.05	0.84	0.0012843	19.6583
PCOS	Eubacteriumventriosumgroup	rs9316536	T	G	-0.0817111	0.0183121	7.84e-06	0.062	0.054	0.25	0.00130059	19.9081
PCOS	Eubacteriumventriosumgroup	rs13082419	C	T	-0.0715522	0.016137	9.56e-06	0.1	0.043	0.019	0.00135399	19.6581
PCOS	Bacteroides	rs6795673	C	T	0.0538565	0.0105251	3.38e-07	0.018	0.031	0.56	0.00142865	26.1803
PCOS	Bacteroides	rs66474973	G	T	0.0812515	0.0164479	6.81e-07	-0.029	0.053	0.58	0.0014001	24.4001
PCOS	Bacteroides	rs11585893	A	G	-0.0740746	0.0147633	1.8e-06	-0.093	0.049	0.055	0.00141067	25.1722
PCOS	Bacteroides	rs9507307	C	T	0.0604456	0.0129128	2.13e-06	-0.052	0.041	0.21	0.00120359	21.91
PCOS	Bacteroides	rs17619981	T	G	0.0880978	0.0187002	2.69e-06	-0.052	0.051	0.3	0.00140263	22.1913
PCOS	Bacteroides	rs495004	C	G	-0.0782324	0.0167634	5.02e-06	0.053	0.04	0.18	0.00123421	21.8787
PCOS	Bacteroides	rs66710942	C	T	0.0488038	0.0107412	5.86e-06	0.065	0.033	0.047	0.00115709	20.642
PCOS	Bacteroides	rs1340391	T	C	-0.0592004	0.0132244	6.73e-06	0.039	0.039	0.32	0.00109376	20.0377
PCOS	Bacteroides	rs13207588	A	G	-0.059205	0.0131195	7.49e-06	-0.0082	0.043	0.85	0.00114879	20.3627
PCOS	Anaerotruncus	rs6563550	T	C	0.0877135	0.0176745	2.35e-07	-0.08	0.061	0.19	0.00148449	24.6256
PCOS	Anaerotruncus	rs8005030	C	T	0.0554447	0.0117854	2.28e-06	-0.0049	0.034	0.88	0.00133568	22.1297
PCOS	Anaerotruncus	rs4669806	G	T	0.0576389	0.0122994	2.42e-06	-0.0072	0.035	0.84	0.00132395	21.9589
PCOS	Anaerotruncus	rs9347879	T	C	0.050618	0.011049	4.22e-06	-0.034	0.031	0.28	0.00126531	20.9851
PCOS	Anaerotruncus	rs1272208	G	T	-0.0611743	0.0129831	4.28e-06	-0.0037	0.037	0.92	0.00137563	22.1988
PCOS	Anaerotruncus	rs11018566	A	G	-0.156465	0.0366032	6.14e-06	0.088	0.072	0.22	0.00290211	18.2666
PCOS	Anaerotruncus	rs6494922	A	G	0.0903106	0.0202257	6.62e-06	-0.021	0.062	0.74	0.00123937	19.9351
PCOS	Anaerotruncus	rs10150232	A	G	0.0567088	0.0124877	6.68e-06	0.0043	0.036	0.91	0.0012779	20.6197
PCOS	Anaerotruncus	rs115414803	A	C	-0.144356	0.0317524	6.83e-06	0.11	0.067	0.099	0.00222397	20.6644
PCOS	Anaerotruncus	rs1431492	C	T	-0.0654996	0.0146188	7.36e-06	0.0042	0.042	0.92	0.00121079	20.0725
PCOS	Anaerotruncus	rs17734739	T	C	0.0660052	0.014908	7.43e-06	0.058	0.042	0.17	0.00122927	19.6002
PCOS	Anaerotruncus	rs7155595	C	A	0.0539336	0.0118903	7.55e-06	0.0042	0.034	0.9	0.00124142	20.5722
PCOS	Anaerotruncus	rs34449434	A	C	-0.0497004	0.0113402	9.85e-06	0.012	0.042	0.77	0.00119035	19.2054
PCOS	Anaerostipes	rs7193624	C	T	0.0750642	0.0150723	5.35e-07	-0.042	0.043	0.32	0.00146324	24.8001
PCOS	Anaerostipes	rs62157625	T	C	0.088573	0.0185548	1.45e-06	-0.071	0.052	0.17	0.00149544	22.7842
PCOS	Anaerostipes	rs62215703	G	A	0.0644965	0.0136702	1.98e-06	0.015	0.038	0.69	0.00142946	22.2571
PCOS	Anaerostipes	rs2804244	A	G	-0.053089	0.0110983	2.04e-06	-0.006	0.031	0.84	0.00135007	22.8795
PCOS	Anaerostipes	rs3900776	G	A	-0.110013	0.0236302	2.75e-06	-0.0097	0.065	0.88	0.00147291	21.6719
PCOS	Anaerostipes	rs2396460	T	C	-0.0512653	0.0109555	2.91e-06	-0.038	0.032	0.23	0.00129307	21.8941
PCOS	Anaerostipes	rs6854026	T	C	-0.0508482	0.0109075	3.2e-06	0.016	0.031	0.61	0.00128267	21.7294
PCOS	Anaerostipes	rs6726833	C	A	-0.0877497	0.0189408	3.32e-06	0.0088	0.064	0.89	0.0012666	21.4606
PCOS	Anaerostipes	rs60983350	G	A	-0.0539901	0.0116575	4.42e-06	0.025	0.052	0.64	0.00131065	21.4468
PCOS	Anaerostipes	rs2014785	T	C	0.0515687	0.0112199	4.68e-06	0.0003	0.034	0.99	0.00128294	21.1224
PCOS	Anaerostipes	rs78735375	A	C	-0.137429	0.0305304	5.33e-06	0.069	0.1	0.49	0.001952	20.2584
PCOS	Anaerostipes	rs6474958	A	G	-0.0500065	0.0112001	6.74e-06	-0.0035	0.032	0.91	0.00117693	19.9324
PCOS	Anaerostipes	rs10502061	A	G	0.0835752	0.0192017	7.94e-06	0.065	0.057	0.25	0.00112469	18.942
PCOS	Anaerofilum	rs816292	T	C	-0.113003	0.02204	2.64e-07	0.052	0.035	0.13	0.00521241	26.2772
PCOS	Anaerofilum	rs79598899	C	T	0.182586	0.0357284	3.75e-07	-0.063	0.065	0.33	0.00551538	26.1049
PCOS	Anaerofilum	rs712981	A	C	0.10076	0.0202902	6.83e-07	0.013	0.032	0.68	0.00485854	24.6505
PCOS	Anaerofilum	rs4506496	G	A	0.10309	0.0212861	1.49e-06	0.032	0.033	0.34	0.00473034	23.4457
PCOS	Anaerofilum	rs10794359	T	C	-0.0953524	0.02006	2.23e-06	0.0094	0.033	0.78	0.00450395	22.5854
PCOS	Anaerofilum	rs17096874	C	T	-0.126337	0.0268919	2.86e-06	-0.061	0.041	0.14	0.00435058	22.062
PCOS	Anaerofilum	rs1563175	A	C	0.0923834	0.0202157	5.54e-06	0.033	0.031	0.29	0.00411757	20.8755
PCOS	Anaerofilum	rs356049	G	A	0.132603	0.0289802	6.56e-06	0.012	0.051	0.81	0.00417482	20.9281
PCOS	Anaerofilum	rs17012738	T	G	0.0903417	0.0200239	7.24e-06	-0.023	0.031	0.47	0.00401378	20.3472
PCOS	Anaerofilum	rs9299345	T	C	-0.1364	0.0302372	8.04e-06	-0.0084	0.047	0.86	0.00401255	20.341
PCOS	Anaerofilum	rs4244069	G	A	-0.146775	0.0326594	9.81e-06	-0.041	0.05	0.42	0.00399923	20.1888
PCOS	Alloprevotella	rs12675596	G	T	0.145669	0.0290678	9.64e-07	-0.013	0.037	0.73	0.00827981	25.0969
PCOS	Alloprevotella	rs4680035	A	G	-0.119599	0.0259446	4.99e-06	-0.0071	0.031	0.82	0.00701735	21.2361
PCOS	Alloprevotella	rs58212166	A	G	-0.161506	0.0359102	7.94e-06	0.0059	0.045	0.9	0.00668624	20.2139
PCOS	Alloprevotella	rs2154444	T	G	0.138234	0.0308961	8.37e-06	0.0051	0.039	0.89	0.00660881	20.0049
PCOS	Alloprevotella	rs4364940	A	G	0.126418	0.0282207	8.58e-06	-0.0066	0.035	0.85	0.00662695	20.0535
PCOS	Alloprevotella	rs34619204	G	A	-0.156037	0.0344392	8.84e-06	0.056	0.041	0.17	0.00678943	20.5144
PCOS	Allisonella	rs602075	A	G	0.168974	0.0296976	3.57e-08	0.018	0.035	0.6	0.00997858	32.3541
PCOS	Allisonella	rs35778461	C	T	0.146679	0.0297186	1.21e-06	0.017	0.038	0.65	0.007527	24.3449
PCOS	Allisonella	rs6742198	G	A	0.149152	0.0316484	3.35e-06	-0.027	0.039	0.48	0.00693158	22.1963
PCOS	Allisonella	rs1901739	T	G	0.115769	0.0248626	3.59e-06	-0.01	0.031	0.74	0.00670486	21.6679
PCOS	Allisonella	rs35110698	T	C	-0.146322	0.0320852	5.72e-06	0.0042	0.043	0.92	0.00643326	20.7845
PCOS	Allisonella	rs76904847	G	A	0.148523	0.0334857	6.09e-06	0.029	0.048	0.55	0.00614462	19.6607
PCOS	Allisonella	rs7898615	T	G	0.167966	0.0373586	8.87e-06	0.046	0.049	0.35	0.00625407	20.2019
PCOS	Allisonella	rs594561	C	T	0.112231	0.0251681	9.41e-06	-0.041	0.032	0.2	0.00615272	19.8725
PCOS	Alistipes	rs11769002	G	A	-0.0528793	0.0109389	1.45e-06	-0.0007	0.033	0.98	0.00132817	23.3657
PCOS	Alistipes	rs67705352	T	G	-0.0532404	0.0110864	1.65e-06	0.029	0.032	0.37	0.00131109	23.0596
PCOS	Alistipes	rs7129639	C	A	-0.0524955	0.0109584	1.78e-06	0.006	0.033	0.85	0.00130433	22.9458
PCOS	Alistipes	rs1107244	G	A	0.0758558	0.0171182	3.59e-06	-0.079	0.061	0.19	0.00111629	19.6341
PCOS	Alistipes	rs1689282	A	C	-0.0520061	0.0113942	5.28e-06	-0.013	0.034	0.72	0.00121751	20.8301
PCOS	Alistipes	rs34417064	A	G	-0.048202	0.0106868	7.01e-06	0.028	0.031	0.36	0.00115653	20.3414
PCOS	Alistipes	rs2450745	A	C	-0.080524	0.0184702	7.12e-06	-0.021	0.056	0.71	0.00108054	19.0046
PCOS	Alistipes	rs4810359	A	G	-0.0652428	0.0146155	7.5e-06	-0.056	0.042	0.18	0.00114522	19.9244
PCOS	Alistipes	rs62576416	T	C	0.0492647	0.0109733	7.5e-06	-0.021	0.032	0.51	0.00114624	20.1534
PCOS	Alistipes	rs12990744	C	T	-0.0776618	0.0172986	8.21e-06	0.0003	0.052	1	0.0012059	20.1531
PCOS	Alistipes	rs2875322	T	C	-0.0580945	0.0131432	8.78e-06	0.037	0.04	0.35	0.00111779	19.5351
PCOS	Alistipes	rs2290844	C	T	0.0813969	0.0191632	9.1e-06	-0.039	0.058	0.5	0.00102574	18.0398
PCOS	Alistipes	rs11958296	A	G	-0.0981222	0.0218272	9.3e-06	0.02	0.061	0.74	0.00124482	20.2062
PCOS	Akkermansia	rs111862613	T	C	0.0911199	0.0196748	3.39e-06	-0.046	0.073	0.52	0.00184246	21.4452
PCOS	Akkermansia	rs117107102	A	G	0.204406	0.0431629	3.01e-06	-0.04	0.072	0.58	0.00448856	22.4178
PCOS	Akkermansia	rs11729256	T	C	0.0750473	0.0150184	6.58e-07	0.031	0.036	0.38	0.00210099	24.966
PCOS	Akkermansia	rs12908520	G	A	0.061772	0.0130954	2.26e-06	0.02	0.032	0.53	0.0018723	22.2471
PCOS	Akkermansia	rs2602429	C	T	0.0745352	0.0156201	2.72e-06	-0.0078	0.041	0.85	0.00194416	22.7656
PCOS	Akkermansia	rs4242783	G	A	0.0685454	0.0147701	3e-06	0.045	0.037	0.22	0.00183914	21.5336
PCOS	Akkermansia	rs4936098	A	G	0.0649225	0.0135934	1.1e-06	-0.0072	0.034	0.83	0.00192011	22.8067
PCOS	Akkermansia	rs61779207	G	A	-0.0760539	0.0167769	6.32e-06	0.051	0.04	0.19	0.00176997	20.5468
PCOS	Akkermansia	rs74542928	T	C	0.112623	0.0236434	1.48e-06	-0.021	0.057	0.71	0.00201908	22.6858
PCOS	Akkermansia	rs9349825	A	G	-0.0703407	0.0147133	2.6e-06	0.071	0.036	0.046	0.0019239	22.8518
PCOS	Akkermansia	rs941682	G	A	-0.0632957	0.0143777	9.17e-06	0.027	0.034	0.43	0.00163864	19.3775
PCOS	Adlercreutzia	rs2717140	C	T	-0.083381	0.0168901	9.77e-07	0.019	0.034	0.57	0.00272795	22.5425
PCOS	Adlercreutzia	rs6664405	T	C	-0.119225	0.0251081	2.05e-06	0.1	0.05	0.036	0.00253378	20.4462
PCOS	Adlercreutzia	rs9490822	C	T	-0.0734512	0.0155789	2.54e-06	-0.027	0.031	0.38	0.00268949	22.2238
PCOS	Adlercreutzia	rs7680684	C	T	0.143237	0.0311654	4.81e-06	-0.0013	0.062	0.98	0.00294783	24.3649
PCOS	Adlercreutzia	rs55719207	G	A	-0.0953084	0.0210752	5.23e-06	0.055	0.051	0.28	0.00236934	19.5721
PCOS	Adlercreutzia	rs11604400	C	T	0.0749219	0.016833	8.22e-06	-0.0013	0.034	0.97	0.00234559	19.0557
PCOS	Adlercreutzia	rs9915817	T	C	-0.0699243	0.0158036	9.61e-06	0.016	0.035	0.65	0.00239754	19.8056
PCOS	Adlercreutzia	rs13231526	C	A	-0.102524	0.0234834	9.74e-06	0.014	0.052	0.78	0.00261684	21.1182
PCOS	Actinomyces	rs34583783	G	T	0.126596	0.0268461	4.49e-06	0.0031	0.05	0.95	0.00296881	22.2311
PCOS	Actinomyces	rs4146653	G	A	0.0985224	0.0214182	4.5e-06	0.071	0.041	0.085	0.00282533	21.1537
PCOS	Actinomyces	rs7915461	T	C	0.18776	0.0401636	5.92e-06	0.1	0.052	0.055	0.00412048	21.8462
PCOS	Actinomyces	rs2715439	C	T	0.0746684	0.0164822	6.27e-06	-0.012	0.032	0.7	0.00274061	20.5177
PCOS	Actinomyces	rs35011108	A	G	0.232634	0.0512044	6.34e-06	-0.018	0.092	0.84	0.00583798	20.6293
PCOS	Actinomyces	rs4073240	G	A	0.0749687	0.0167368	7.94e-06	0.028	0.033	0.4	0.00267944	20.0585
PCOS	Actinomyces	rs71315246	A	G	-0.0969809	0.021925	9.83e-06	-0.062	0.046	0.18	0.00261307	19.5603
PCOS	Ruminococcustorquesgroup	rs35866622	T	C	-0.0612024	0.0109421	2.21e-08	0.0009	0.032	0.98	0.00181138	31.2812
PCOS	Ruminococcustorquesgroup	rs10904297	A	G	-0.167804	0.0389812	2.69e-06	0.16	0.096	0.088	0.00586135	18.5191
PCOS	Ruminococcustorquesgroup	rs12434631	A	G	0.074697	0.0153401	2.77e-06	-0.045	0.052	0.38	0.00136454	23.7084
PCOS	Ruminococcustorquesgroup	rs8080469	G	A	0.0490727	0.0107036	3.5e-06	0.02	0.031	0.52	0.0011796	21.0169
PCOS	Ruminococcustorquesgroup	rs4073731	T	C	0.0651948	0.0142221	4.05e-06	-0.021	0.046	0.64	0.0011796	21.0111
PCOS	Ruminococcustorquesgroup	rs77034621	T	G	-0.151553	0.0335878	6.07e-06	-0.096	0.067	0.15	0.00237086	20.3547
PCOS	Ruminococcustorquesgroup	rs1475330	T	C	0.0523492	0.01182	8.13e-06	-0.036	0.037	0.33	0.00112906	19.6125
PCOS	Ruminococcustorquesgroup	rs10967781	C	A	0.0507994	0.0113322	8.37e-06	0.0001	0.034	1	0.00112822	20.0927
PCOS	Ruminococcustorquesgroup	rs8141465	A	G	0.0480778	0.0107442	9.65e-06	-0.017	0.031	0.59	0.00112422	20.0212
PCOS	Ruminococcusgnavusgroup	rs13163520	G	A	-0.127377	0.0233883	5.61e-08	0.028	0.042	0.5	0.00466688	29.6517
PCOS	Ruminococcusgnavusgroup	rs2909242	C	A	-0.0909965	0.018351	7.41e-07	-0.021	0.033	0.53	0.00382663	24.5807
PCOS	Ruminococcusgnavusgroup	rs9872758	T	C	0.0849233	0.0176643	1.66e-06	0.021	0.032	0.51	0.00359956	23.106
PCOS	Ruminococcusgnavusgroup	rs3124783	A	G	-0.11599	0.0249099	2.67e-06	-0.024	0.045	0.59	0.00337581	21.675
PCOS	Ruminococcusgnavusgroup	rs934940	A	C	-0.105045	0.0229588	2.74e-06	0.066	0.042	0.12	0.00330713	20.9273
PCOS	Ruminococcusgnavusgroup	rs12136548	C	T	0.0901946	0.0196476	3.1e-06	-0.013	0.034	0.71	0.00328146	21.0672
PCOS	Ruminococcusgnavusgroup	rs62167033	T	C	0.185289	0.0396295	3.5e-06	-0.024	0.07	0.74	0.00419117	21.8522
PCOS	Ruminococcusgnavusgroup	rs11864644	T	C	-0.139804	0.0318253	5.01e-06	0.0063	0.067	0.93	0.00308245	19.2909
PCOS	Ruminococcusgnavusgroup	rs78399089	T	C	0.144445	0.0326618	6.63e-06	-0.053	0.057	0.35	0.00327959	19.5514
PCOS	Ruminococcusgnavusgroup	rs11597105	A	G	0.114673	0.0250653	6.95e-06	0.022	0.042	0.6	0.00329667	20.9237
PCOS	Ruminococcusgnavusgroup	rs12989336	G	A	-0.0846861	0.0187936	7.12e-06	-0.052	0.033	0.12	0.00316213	20.2987
PCOS	Ruminococcusgnavusgroup	rs4388134	C	T	-0.0904997	0.0203544	9.12e-06	0.051	0.039	0.19	0.00307982	19.7625
PCOS	Eubacteriumxylanophilumgroup	rs17830032	G	A	-0.160597	0.0310515	2.39e-07	0.014	0.071	0.84	0.00279988	26.7437
PCOS	Eubacteriumxylanophilumgroup	rs13239072	G	A	0.0687427	0.0142728	1.82e-06	-0.03	0.036	0.41	0.00174019	23.1936
PCOS	Eubacteriumxylanophilumgroup	rs10917203	A	C	0.0612633	0.0130917	3.15e-06	0.0019	0.033	0.95	0.00169074	21.8949
PCOS	Eubacteriumxylanophilumgroup	rs112176119	C	T	-0.113455	0.0245762	3.33e-06	-0.049	0.073	0.5	0.00174397	21.3084
PCOS	Eubacteriumxylanophilumgroup	rs1999224	G	T	-0.0949051	0.0203503	3.75e-06	0.078	0.052	0.13	0.00163149	21.7457
PCOS	Eubacteriumxylanophilumgroup	rs2213117	T	G	0.0877797	0.0189012	4.21e-06	0.025	0.049	0.61	0.00167199	21.5646
PCOS	Eubacteriumxylanophilumgroup	rs10140184	A	C	0.0576795	0.012599	4.96e-06	-0.049	0.04	0.22	0.00161834	20.9558
PCOS	Eubacteriumxylanophilumgroup	rs2012708	A	G	0.0573202	0.0126905	6.53e-06	-0.011	0.032	0.73	0.0015309	20.3983
PCOS	Eubacteriumxylanophilumgroup	rs75586835	A	G	-0.114498	0.0263455	9.39e-06	-0.17	0.067	0.011	0.00150274	18.8848
PCOS	Eubacteriumrectalegroup	rs35398954	A	G	-0.0901402	0.0174602	5.4e-07	-0.071	0.05	0.16	0.00160098	26.6494
PCOS	Eubacteriumrectalegroup	rs314726	T	C	0.0528824	0.0109486	1.38e-06	0.059	0.033	0.079	0.00137318	23.3266
PCOS	Eubacteriumrectalegroup	rs10797540	A	G	0.0503179	0.0108389	3.53e-06	-0.02	0.031	0.52	0.0012406	21.5487
PCOS	Eubacteriumrectalegroup	rs10248854	C	A	-0.0527827	0.0113463	4.21e-06	-0.035	0.033	0.28	0.00124589	21.6382
PCOS	Eubacteriumrectalegroup	rs59427698	A	G	-0.0576035	0.0130853	5.37e-06	-0.023	0.038	0.54	0.00116513	19.3765
PCOS	Eubacteriumrectalegroup	rs2884897	A	G	-0.129364	0.0289021	6.44e-06	0.053	0.077	0.49	0.00184934	20.0303
PCOS	Eubacteriumrectalegroup	rs143694765	T	C	0.0870025	0.019779	9.75e-06	-0.072	0.056	0.19	0.00127772	19.3464
PCOS	Eubacteriumrectalegroup	rs62547233	A	G	0.0536319	0.0120201	9.9e-06	-0.013	0.035	0.7	0.00114633	19.9059
PCOS	Eubacteriumoxidoreducensgroup	rs2973294	G	T	0.0923559	0.0195439	2.39e-06	0.02	0.031	0.52	0.00413511	22.3227
PCOS	Eubacteriumoxidoreducensgroup	rs34561138	G	A	0.216145	0.045992	2.51e-06	0.067	0.07	0.34	0.0052486	22.076
PCOS	Eubacteriumoxidoreducensgroup	rs12423772	G	T	0.14098	0.0295029	2.63e-06	-0.033	0.065	0.61	0.00427298	22.8255
PCOS	Eubacteriumoxidoreducensgroup	rs12129908	C	A	0.0893272	0.0198333	5.8e-06	0.0037	0.032	0.91	0.0037584	20.2776
PCOS	Eubacteriumnodatumgroup	rs10263623	C	T	-0.186907	0.0341475	6.6e-08	-0.012	0.059	0.84	0.0062674	19.4127
PCOS	Eubacteriumnodatumgroup	rs10458299	T	C	0.201788	0.0413568	9.05e-07	0.0052	0.059	0.93	0.00608115	20.0009
PCOS	Eubacteriumnodatumgroup	rs11006576	A	G	0.160621	0.0341609	3.56e-06	-0.018	0.032	0.56	0.00605327	20.0548
PCOS	Eubacteriumnodatumgroup	rs113893692	C	T	-0.185107	0.0403573	5.76e-06	0.0071	0.052	0.89	0.00654155	21.0247
PCOS	Eubacteriumnodatumgroup	rs34297067	A	G	-0.125454	0.0275303	6.84e-06	-0.068	0.043	0.12	0.00907593	29.941
PCOS	Eubacteriumnodatumgroup	rs61841040	G	T	0.1223	0.0271331	7.17e-06	0.003	0.042	0.94	0.00666479	22.0944
PCOS	Eubacteriumnodatumgroup	rs6818880	A	G	-0.130234	0.0292347	7.21e-06	-0.011	0.033	0.73	0.00604942	20.0176
PCOS	Eubacteriumnodatumgroup	rs77910827	C	T	-0.110081	0.0245964	7.83e-06	0.029	0.051	0.57	0.00722551	23.7921
PCOS	Eubacteriumnodatumgroup	rs7827125	C	T	-0.110167	0.024593	7.99e-06	-0.0002	0.035	1	0.00612996	20.3043
PCOS	Eubacteriumnodatumgroup	rs7880204	T	C	-0.187753	0.041969	8.37e-06	-0.03	0.036	0.41	0.00626459	20.753
PCOS	Eubacteriumnodatumgroup	rs9425984	T	C	0.193496	0.0439023	8.91e-06	-0.031	0.037	0.4	0.00598852	19.833
PCOS	Eubacteriumhalliigroup	rs13116360	T	C	0.154124	0.0297185	2.94e-07	0.063	0.074	0.4	0.00259868	26.8908
PCOS	Eubacteriumhalliigroup	rs10798999	C	T	0.0601661	0.0126752	2.61e-06	-0.016	0.037	0.66	0.00135867	22.5288
PCOS	Eubacteriumhalliigroup	rs60254196	A	G	-0.0522832	0.0111865	2.7e-06	0.016	0.034	0.64	0.00134344	21.8415
PCOS	Eubacteriumhalliigroup	rs949971	T	G	-0.0540164	0.0116101	3.29e-06	-0.019	0.032	0.55	0.00130496	21.6436
PCOS	Eubacteriumhalliigroup	rs74018587	C	T	0.208943	0.043822	3.7e-06	-0.011	0.091	0.9	0.00742512	22.7188
PCOS	Eubacteriumhalliigroup	rs10808115	A	C	-0.0504747	0.0109922	4.42e-06	0.035	0.032	0.28	0.00127117	21.0825
PCOS	Eubacteriumhalliigroup	rs28584818	A	G	0.126115	0.0268627	4.43e-06	-0.089	0.066	0.17	0.00198265	22.0372
PCOS	Eubacteriumhalliigroup	rs6550770	T	C	-0.198087	0.0443545	4.82e-06	0.12	0.088	0.16	0.00463956	19.9359
PCOS	Eubacteriumhalliigroup	rs10501370	C	T	-0.115589	0.0252489	5.42e-06	-0.11	0.078	0.17	0.00151376	20.9549
PCOS	Eubacteriumhalliigroup	rs138531890	A	G	0.153138	0.0349456	5.43e-06	0.045	0.077	0.55	0.00248455	19.1986
PCOS	Eubacteriumhalliigroup	rs117748144	T	C	-0.126582	0.028712	7.86e-06	-0.02	0.066	0.76	0.00178637	19.4329
PCOS	Eubacteriumhalliigroup	rs78056098	G	T	-0.0507411	0.0113758	8.29e-06	-0.0094	0.033	0.77	0.0011994	19.8931
PCOS	Eubacteriumhalliigroup	rs630939	C	T	-0.0508914	0.0114352	9.16e-06	-0.017	0.034	0.62	0.00121826	19.8037
PCOS	Eubacteriumhalliigroup	rs281379	A	G	-0.0499523	0.0112153	9.33e-06	-0.017	0.032	0.58	0.00122835	19.8352
PCOS	Eubacteriumhalliigroup	rs17074066	T	C	-0.0813986	0.0189272	9.35e-06	-0.021	0.059	0.72	0.00116892	18.4929
PCOS	Eubacteriumhalliigroup	rs17474256	G	A	0.0810805	0.0184573	9.45e-06	-0.0091	0.054	0.86	0.001171	19.2949
PCOS	Eubacteriumfissicatenagroup	rs3771393	C	T	0.130842	0.0266671	7.38e-07	0.013	0.036	0.71	0.00630853	24.0611
PCOS	Eubacteriumfissicatenagroup	rs2733072	G	A	0.109644	0.0228306	1.49e-06	-0.035	0.032	0.28	0.00598126	23.0521
PCOS	Eubacteriumfissicatenagroup	rs11876297	T	C	0.131469	0.0281712	2.67e-06	-0.036	0.042	0.39	0.00637228	21.7662
PCOS	Eubacteriumfissicatenagroup	rs7104872	G	A	0.138612	0.0291906	2.73e-06	-0.001	0.043	0.98	0.00585437	22.5366
PCOS	Eubacteriumfissicatenagroup	rs151257695	A	G	0.20951	0.0454847	3.1e-06	-0.086	0.061	0.16	0.0058801	21.2049
PCOS	Eubacteriumfissicatenagroup	rs11818408	G	A	0.10585	0.0237114	8.2e-06	0.061	0.033	0.06	0.00552041	19.9172
PCOS	Eubacteriumfissicatenagroup	rs10147907	T	G	0.172263	0.039601	8.27e-06	0.14	0.064	0.024	0.0049124	18.9123
PCOS	Eubacteriumfissicatenagroup	rs1768152	T	C	0.139489	0.0316186	8.7e-06	0.033	0.049	0.5	0.005392	19.4514
PCOS	Eubacteriumfissicatenagroup	rs6934739	A	G	0.111463	0.0252788	9.75e-06	0.061	0.034	0.074	0.00504941	19.4323
PCOS	Eubacteriumeligensgroup	rs4583233	A	C	0.0670205	0.0128122	2.84e-07	-0.045	0.036	0.21	0.00190627	27.3595
PCOS	Eubacteriumeligensgroup	rs265534	T	G	-0.0563756	0.0120127	2.27e-06	-0.066	0.031	0.034	0.00148832	22.0212
PCOS	Eubacteriumeligensgroup	rs6923695	T	G	0.103268	0.0229524	4.87e-06	0.0019	0.06	0.98	0.00156784	20.2396
PCOS	Eubacteriumeligensgroup	rs2200429	A	G	-0.0888825	0.0198479	5.3e-06	-0.086	0.057	0.13	0.00135674	20.0514
PCOS	Eubacteriumeligensgroup	rs12719051	A	G	0.0916626	0.0208183	7.12e-06	-0.089	0.059	0.14	0.00151237	19.3831
PCOS	Eubacteriumeligensgroup	rs182318	G	A	-0.0824941	0.0195615	8.4e-06	0.094	0.059	0.11	0.00120208	17.7821
PCOS	Eubacteriumeligensgroup	rs56080211	C	T	0.123093	0.0282743	9.14e-06	-0.062	0.076	0.41	0.00176835	18.9496
PCOS	Eubacteriumcoprostanoligenesgroup	rs17159861	C	T	0.0962228	0.0168388	1.04e-08	0.05	0.053	0.35	0.00187528	32.6499
PCOS	Eubacteriumcoprostanoligenesgroup	rs9648214	T	C	-0.0828719	0.016431	2.52e-07	0.038	0.045	0.4	0.0014616	25.4354
PCOS	Eubacteriumcoprostanoligenesgroup	rs4076415	T	G	0.0515152	0.0110294	1.99e-06	0.0015	0.034	0.96	0.00128464	21.8129
PCOS	Eubacteriumcoprostanoligenesgroup	rs6762473	C	A	0.0521584	0.0112353	4.26e-06	-0.034	0.033	0.3	0.00123871	21.5493
PCOS	Eubacteriumcoprostanoligenesgroup	rs12906958	C	T	-0.0533159	0.0115935	4.35e-06	-0.0022	0.034	0.95	0.00121537	21.1464
PCOS	Eubacteriumcoprostanoligenesgroup	rs76898927	G	A	0.123055	0.0266375	4.79e-06	0.046	0.081	0.57	0.00174663	21.3374
PCOS	Eubacteriumcoprostanoligenesgroup	rs10444197	A	G	-0.0505823	0.0113455	5.98e-06	0.045	0.034	0.18	0.00114236	19.8745
PCOS	Eubacteriumcoprostanoligenesgroup	rs62024432	C	T	-0.0769698	0.0172101	7.5e-06	0.0023	0.05	0.96	0.00115678	19.9996
PCOS	Eubacteriumcoprostanoligenesgroup	rs79895140	T	C	-0.0641017	0.0141153	8.62e-06	-0.013	0.044	0.76	0.00127623	20.6208
PCOS	Eubacteriumcoprostanoligenesgroup	rs1020520	T	G	-0.0590705	0.0132929	8.89e-06	-0.0071	0.039	0.86	0.00113549	19.7448
PCOS	Eubacteriumcoprostanoligenesgroup	rs11720857	C	T	0.0630776	0.0144485	9.26e-06	-0.0064	0.042	0.88	0.00112251	19.057
PCOS	Eubacteriumcoprostanoligenesgroup	rs11052069	T	C	0.0477832	0.0107833	9.38e-06	0.0035	0.032	0.91	0.00112851	19.6333
PCOS	Eubacteriumcoprostanoligenesgroup	rs2644213	G	A	0.0538845	0.0121245	9.86e-06	0.0065	0.035	0.86	0.00113517	19.7494
PCOS	Eubacteriumbrachygroup	rs112617308	T	C	-0.170873	0.0362844	2.38e-06	0.035	0.053	0.5	0.00551239	22.1662
PCOS	Eubacteriumbrachygroup	rs4862235	G	A	0.104806	0.0225751	3.73e-06	0.016	0.032	0.62	0.00535945	21.5425
PCOS	Eubacteriumbrachygroup	rs62348779	T	C	-0.201481	0.043286	3.78e-06	0.0079	0.063	0.9	0.00562938	21.6543
PCOS	Eubacteriumbrachygroup	rs2913110	C	T	0.105143	0.022942	4.56e-06	0.052	0.032	0.1	0.00522224	20.9934
PCOS	Eubacteriumbrachygroup	rs1384962	A	G	0.120888	0.0266264	6.99e-06	0.0011	0.037	0.98	0.00512557	20.6028
PCOS	Eubacteriumbrachygroup	rs720439	A	G	-0.111927	0.0251252	7.03e-06	-0.004	0.036	0.91	0.00493551	19.835
PCOS	Eubacteriumbrachygroup	rs6591893	G	A	0.108225	0.0240319	7.34e-06	-0.015	0.034	0.66	0.00504586	20.2706
PCOS	Eubacteriumbrachygroup	rs13139592	T	C	-0.145997	0.0327192	7.97e-06	0.065	0.045	0.15	0.00515558	19.9
PCOS	Eubacteriumbrachygroup	rs73199919	T	C	-0.236717	0.0531335	8.16e-06	-0.054	0.086	0.53	0.00655522	19.835
PCOS	Eubacteriumbrachygroup	rs12151423	A	G	0.101329	0.0227324	9.27e-06	-0.061	0.032	0.057	0.00512893	19.8585
PCOS	Clostridiuminnocuumgroup	rs6890185	T	C	0.113424	0.0233137	1.12e-06	0.03	0.033	0.37	0.00564942	23.6579
PCOS	Clostridiuminnocuumgroup	rs1942371	G	A	-0.157938	0.034187	4.06e-06	-0.061	0.05	0.22	0.00534594	21.3321
PCOS	Clostridiuminnocuumgroup	rs61267978	T	C	0.14708	0.0320875	5.59e-06	0.023	0.046	0.62	0.00501918	21.0002
PCOS	Clostridiuminnocuumgroup	rs10074000	T	C	-0.102648	0.0227508	7e-06	0.033	0.033	0.32	0.00500366	20.3466
PCOS	Clostridiuminnocuumgroup	rs4869133	G	A	-0.180591	0.0409505	7.24e-06	-0.035	0.059	0.55	0.00517994	19.4374
PCOS	Clostridiuminnocuumgroup	rs6577484	G	A	0.160425	0.0360857	8.41e-06	-0.035	0.055	0.52	0.00509671	19.7536
PCOS	Clostridiuminnocuumgroup	rs77845139	A	G	-0.114993	0.0257186	8.41e-06	0.017	0.037	0.65	0.00491436	19.9817
PCOS	Clostridiuminnocuumgroup	rs40656	C	T	0.142664	0.0311021	8.62e-06	0.043	0.054	0.43	0.00517082	21.0299
PCOS	Clostridiuminnocuumgroup	rs10506058	A	G	0.0997048	0.0221926	8.92e-06	-0.014	0.032	0.67	0.00482514	20.1748
PCOS	CandidatusSoleaferrea	rs61825792	T	C	0.112199	0.0231856	1.37e-06	-0.029	0.04	0.46	0.00379638	23.41
PCOS	CandidatusSoleaferrea	rs10108780	A	G	-0.092834	0.0199807	3.64e-06	0.0043	0.038	0.91	0.00358555	21.5799
PCOS	CandidatusSoleaferrea	rs10090365	A	G	-0.0834413	0.0180989	4.17e-06	-0.015	0.031	0.64	0.00344697	21.248
PCOS	CandidatusSoleaferrea	rs10809135	T	C	0.0834858	0.0182426	5.47e-06	-0.024	0.034	0.49	0.00347903	20.9366
PCOS	CandidatusSoleaferrea	rs4678258	T	C	0.0986136	0.0215646	5.53e-06	-0.037	0.037	0.31	0.00341588	20.9049
PCOS	CandidatusSoleaferrea	rs6494306	A	G	-0.0969304	0.0214221	5.8e-06	0.065	0.037	0.076	0.0033207	20.467
PCOS	CandidatusSoleaferrea	rs9973954	A	G	0.0892075	0.0195401	5.95e-06	-0.021	0.034	0.53	0.0033803	20.8356
PCOS	CandidatusSoleaferrea	rs6489992	A	G	-0.0840437	0.0187031	7.89e-06	0.0052	0.033	0.87	0.0032768	20.1857
PCOS	CandidatusSoleaferrea	rs7400877	T	C	-0.0951085	0.0212799	9.29e-06	0.032	0.037	0.39	0.00324017	19.9691
Notes: PCOS:polycystic ovary syndrome; Beta: estimate coefficient; P-value: P-value from GWAS ; SE: standard error of coefficient estimate.

## Sheet: Supplementary Table 2A
Supplementary Table 2A. MR analysis of all gut microbiome in the PCOS.(P<1e-5)
Trait	Bacterial genera	NO.SNP	Methods	OR	95% CI	Beta	Se	P-value	Cochran’s Q	Q_P-value	Egger_intercept	Se	P-value	MR-PRESSO
PCOS	Streptococcus	15	MR Egger	2.35719	0.80-6.96	0.857472	0.55273	0.144816	6.60996	0.921118	-0.0344099	0.0419035	0.426353	0.969
			IVW	1.52451	1.13-2.06	0.421673	0.154471	0.00633746	7.28428	0.923197
			Weighted median	1.62053	1.07-2.46	0.482756	0.206238	0.0234174
			Weighted mode	1.7049	0.89-3.25	0.533507	0.344903	0.127974
PCOS	Sellimonas	9	MR Egger	1.13729	0.38-3.43	0.128645	0.564641	0.826287	3.93323	0.787435	-0.0705586	0.0796676	0.405195	0.497
			IVW	0.694661	0.58-0.83	-0.364332	0.0948426	0.000122317	4.71763	0.787286
			Weighted median	0.68802	0.54-0.88	-0.373937	0.127279	0.00330401
			Weighted mode	0.702191	0.47-1.05	-0.35355	0.205513	0.123683
PCOS	RuminococcaceaeUCG011	8	MR Egger	0.323754	0.11-0.91	-1.12777	0.529657	0.0772895	6.51123	0.368418	0.114321	0.0700804	0.153951	0.275
			IVW	0.755003	0.60-0.95	-0.281034	0.117257	0.0165421	9.39907	0.22526
			Weighted median	0.752809	0.57-0.95	-0.283944	0.140129	0.0493111
			Weighted mode	0.611281	0.37-1.02	-0.492198	0.261935	0.117673
PCOS	RuminococcaceaeUCG005	14	MR Egger	1.20437	0.53-2.72	0.185954	0.417008	0.663591	11.9077	0.453124	0.0123463	0.0340903	0.723527	0.349
			IVW	1.38686	1.04-1.86	0.327044	0.148749	0.0279045	12.0388	0.524463
			Weighted median	1.32829	0.89-1.89	0.283895	0.203923	0.163872
			Weighted mode	1.22516	0.65-2.31	0.203069	0.323429	0.540966
PCOS	Coprococcus2	8	MR Egger	1.02796	0.02-56.37	0.0275755	2.04304	0.989669	10.8907	0.0918147	-0.029171	0.145588	0.847812	0.121
			IVW	0.684746	0.43-1.08	-0.378707	0.23224	0.102959	10.9635	0.140217
			Weighted median	0.595978	0.35-1.01	-0.517552	0.267349	0.0528842
			Weighted mode	0.532508	0.25-1.11	-0.630158	0.375682	0.13737
PCOS	Ruminococcusgauvreauiigroup	12	MR Egger	1.19121	0.24-5.89	0.174968	0.81528	0.834384	10.7048	0.380974	-0.034599	0.0559356	0.550041	0.53
			IVW	0.727478	0.53-1.01	-0.318171	0.165658	0.0547758	11.1144	0.433732
			Weighted median	0.781994	0.50- 1.23	-0.245908	0.230995	0.287073
			Weighted mode	0.780828	0.37-1.66	-0.247401	0.38352	0.532099
PCOS	Victivallis	10	MR Egger	0.94	0.26-3.39	-0.0642622	0.656082	0.924383	4.27212	0.831775	0.0201599	0.0862784	0.821117	0.776
			IVW	1.09	0.92-1.30	0.0876605	0.0877639	0.317881	4.32672	0.888624
			Weighted median	1.15	0.93-1.44	0.142922	0.111424	0.195798
			Weighted mode	1.22	0.86-1.72	0.199173	0.163442	0.29
PCOS	Veillonella	7	MR Egger	2.69299	0.14-50.6	0.990652	1.49673	0.537331	2.4252	0.787716	-0.0781633	0.114936	0.526671	0.562
			IVW	0.980544	0.69-1.40	-0.0196481	0.182214	0.914131	2.88768	0.822806
			Weighted median	1.08579	0.69-1.72	0.0823069	0.229404	0.726044
			Weighted mode	1.10324	0.59-2.08	0.0982495	0.312389	0.771131
PCOS	Tyzzerella3	13	MR Egger	0.685173	0.24-1.95	-0.378083	0.534707	0.494221	8.74151	0.645738	0.0625954	0.0764137	0.430083	0.642
			IVW	1.05414	0.28-1.27	0.0527215	0.0966106	0.585264	9.41254	0.667348
			Weighted median	1.01324	0.79-1.30	0.0131535	0.128161	0.919333
			Weighted mode	0.812115	0.50-1.33	-0.208114	0.244543	0.425677
PCOS	Turicibacter	10	MR Egger	1.20153	0.36-3.98	0.183593	0.611681	0.771718	5.37567	0.716772	-0.0358203	0.0632495	0.586699	0.76
			IVW	0.857898	0.64-1.13	-0.15327	0.14265	0.28262	5.69641	0.769876
			Weighted median	0.844045	0.58-1.21	-0.169549	0.19211	0.355627
			Weighted mode	0.912051	0.51-1.64	-0.0920596	0.304687	0.766296
PCOS	Terrisporobacter	5	MR Egger	2.28381	0.93-5.62	0.825846	0.459719	0.170291	0.580028	0.900989	-0.106852	0.0486401	0.115519	0.351
			IVW	0.892912	0.61- 1.31	-0.113267	0.196565	0.564458	5.40587	0.248128
			Weighted median	1.0326	0.67-1.60	0.032078	0.221411	0.884805
			Weighted mode	1.21123	0.65-2.26	0.191636	0.319324	0.580763
PCOS	Sutterella	12	MR Egger	1.01679	0.22-4.76	0.0166549	0.787504	0.983543	9.38895	0.495631	0.013516	0.0516575	0.798904	0.587
			IVW	1.24417	0.91-1.70	0.218468	0.158827	0.168972	9.45741	0.579749
			Weighted median	1.12096	0.74-1.69	0.114185	0.208774	0.584426
			Weighted mode	0.97935	0.49-1.97	-0.0208658	0.356267	0.954347
PCOS	Subdoligranulum	11	MR Egger	0.497951	0.20-1.25	-0.697253	0.468265	0.170665	7.94074	0.540129	0.0573058	0.0327654	0.114229	0.362
			IVW	1.0607	0.73-1.54	0.0589262	0.188605	0.754713	10.9996	0.357546
			Weighted median	0.925689	0.57-1.51	-0.0772167	0.248586	0.756087
			Weighted mode	0.833674	0.41-1.69	-0.181913	0.361657	0.625858
PCOS	Slackia	6	MR Egger	1.14206	0.09-15.31	0.132835	1.32431	0.924928	7.52344	0.11068	-0.0367241	0.132629	0.795581	0.321
			IVW	0.795289	0.54-1.161	-0.22905	0.193014	0.235346	7.66765	0.175529
			Weighted median	0.898323	0.59-1.37	-0.107226	0.214587	0.617298
			Weighted mode	0.940778	0.55-1.60	-0.0610482	0.270161	0.830171
PCOS	Senegalimassilia	5	MR Egger	1.64571	0.52-5.20	0.49817	0.58702	0.458429	1.91973	0.589232	-0.0417158	0.0565284	0.514022	0.513
			IVW	1.08898	0.77-1.54	0.085238	0.177449	0.630977	2.46432	0.651035
			Weighted median	1.00902	0.64-1.58	0.00897482	0.229917	0.968862
			Weighted mode	0.876681	0.46-1.66	-0.131612	0.325028	0.706253
PCOS	Ruminococcus2	15	MR Egger	1.08388	0.47- 2.50	0.0805456	0.427037	0.853307	9.04311	0.76968	-0.00101546	0.0313381	0.974643	0.848
			IVW	1.06996	0.79- 1.44	0.0676218	0.15259	0.65765	9.04416	0.828211
			Weighted median	1.03457	0.70- 1.53	0.0339847	0.199562	0.864777
			Weighted mode	1.05209	0.58-1.92	0.0507826	0.307111	0.871028
PCOS	Romboutsia	13	MR Egger	1.22012	0.47-3.120	0.198952	0.491664	0.693491	17.8672	0.0847128	-0.020429	0.0417662	0.634359	0.111
			IVW	0.976794	0.69-1.39	-0.02348	0.18088	0.896717	18.2558	0.10814
			Weighted median	1.00935	0.68-1.51	0.00930625	0.204565	0.963715
			Weighted mode	1.07339	0.62-1.86	0.0708192	0.28106	0.805326
PCOS	Ruminococcus1	10	MR Egger	1.6854	0.35-8.03	0.522002	0.796718	0.53073	15.1862	0.0556241	-0.0539982	0.0573528	0.374001	0.109
			IVW	0.834065	0.49-1.43	-0.181444	0.27489	0.509216	16.8689	0.0508086
			Weighted median	0.810378	0.45-1.47	-0.210255	0.303072	0.487842
			Weighted mode	0.820832	0.35-1.90	-0.197437	0.429293	0.656488	15.8479	0.10407	0.0194556	0.0647737	0.770052	0.192
PCOS	RuminococcaceaeUCG009	12	MR Egger	0.720787	0.19-2.76	-0.327412	0.684388	0.642652	15.9909	0.14147
			IVW	0.88066	0.66-1.17	-0.127084	0.147016	0.387356
			Weighted median	0.943085	0.67-1.33	-0.0585984	0.173587	0.735685
			Weighted mode	0.987114	0.52-1.86	-0.0129694	0.323457	0.968735
PCOS	RuminococcaceaeUCG014	11	MR Egger	1.46757	0.49-4.40	0.383606	0.560366	0.510862	11.7754	0.226268	-0.0391972	0.0430682	0.386485	0.308
			IVW	0.909324	0.62-1.32	-0.0950533	0.191744	0.620084	12.8592	0.231652
			Weighted median	1.04338	0.66-1.65	0.0424639	0.232855	0.855298
			Weighted mode	1.20975	0.58-2.53	0.190412	0.376693	0.624174
PCOS	RuminococcaceaeUCG013	12	MR Egger	1.6604	0.60-4.57	0.507061	0.516993	0.34983	12.1741	0.273572	-0.0323823	0.0378796	0.412634	0.094
			IVW	1.09961	0.77-1.58	0.0949545	0.184498	0.606787	13.0638	0.289175
			Weighted median	1.32049	0.83-2.11	0.278	0.238615	0.243996
			Weighted mode	1.4432	0.80-2.60	0.366861	0.299048	0.245523
PCOS	RuminococcaceaeUCG010	6	MR Egger	2.18303	0.53-9.07	0.780716	0.726715	0.343171	2.54372	0.636824	-0.0550512	0.0483322	0.318279	0.714
			IVW	0.991006	0.65-1.52	-0.00903496	0.217633	0.966886	3.84108	0.572515
			Weighted median	1.14709	0.66-2.00	0.13723	0.284083	0.629051
			Weighted mode	1.42224	0.63-3.23	0.352237	0.418878	0.438753
PCOS	RuminococcaceaeUCG004	11	MR Egger	0.574404	0.10-3.20	-0.554423	0.87681	0.542907	11.0673	0.271121	0.0466829	0.0732146	0.539603	0.382
			IVW	0.995793	0.74-1.34	-0.00421587	0.150823	0.9777	11.5673	0.315059
			Weighted median	1.15137	0.79-1.68	0.140954	0.192251	0.463448
			Weighted mode	1.32417	0.73-2.41	0.280784	0.305522	0.379713
PCOS	RuminococcaceaeUCG003	12	MR Egger	1.88583	0.62-5.74	0.634367	0.56831	0.290425	12.4163	0.258162	-0.0371775	0.0417966	0.394636	0.248
			IVW	1.16651	0.83-1.64	0.154018	0.17535	0.379756	13.3986	0.268071
			Weighted median	1.28475	0.84-1.96	0.250568	0.216655	0.247466
			Weighted mode	1.36006	0.74-2.49	0.30753	0.308826	0.340747
PCOS	RuminococcaceaeUCG002	22	MR Egger	1.07144	0.52-2.19	0.0690032	0.365488	0.852154	13.5882	0.850746	-0.0150084	0.0270382	0.584994	0.712
			IVW	0.88587	0.69-1.14	-0.121185	0.127222	0.340821	13.8963	0.874011
			Weighted median	1.02463	0.72-1.45	0.0243286	0.178503	0.89159
			Weighted mode	1.09842	0.56-2.15	0.0938769	0.342875	0.786918
PCOS	RuminococcaceaeNK4A214group	13	MR Egger	1.30748	0.39-4.33	0.268099	0.611244	0.669432	6.58929	0.831302	-0.0203323	0.0429576	0.645246	0.968
			IVW	0.99067	0.71-1.39	-0.00937358	0.173043	0.9568	6.81332	0.8697
			Weighted median	0.96473	0.62-1.50	-0.0359067	0.224684	0.873031
			Weighted mode	1.00484	0.47-2.16	0.00482497	0.3912	0.990362
PCOS	Ruminiclostridium9	9	MR Egger	0.168033	0.02-1.15	-1.7836	0.981637	0.112066	8.3286	0.304512	0.108017	0.0656078	0.143674	0.129
			IVW	0.808953	0.49-1.33	-0.212015	0.252308	0.400738	11.5538	0.172252
			Weighted median	1.10728	0.60-2.04	0.101906	0.312211	0.744121
			Weighted mode	1.2104	0.467-3.14	0.190951	0.486004	0.704656
PCOS	Ruminiclostridium6	16	MR Egger	0.710759	0.36-1.39	-0.341421	0.340414	0.332902	10.6186	0.715702	0.026006	0.0302936	0.405094	0.728
			IVW	0.929715	0.71-1.21	-0.0728767	0.13426	0.587265	11.3556	0.727004
			Weighted median	0.921016	0.64-1.32	-0.0822779	0.184274	0.655238
			Weighted mode	0.918078	0.46-1.85	-0.0854731	0.358031	0.814545
PCOS	Ruminiclostridium5	11	MR Egger	0.37952	0.08-1.81	-0.968849	0.796359	0.254699	2.28625	0.986091	0.0708009	0.0496423	0.187557	0.975
			IVW	1.14198	0.78-1.67	0.132762	0.193875	0.493483	4.32036	0.93174
			Weighted median	1.20388	0.73-1.99	0.185546	0.255247	0.467271
			Weighted mode	1.18766	0.56-2.50	0.171982	0.38063	0.66103
PCOS	Roseburia	14	MR Egger	1.79824	0.50-6.46	0.586807	0.652833	0.386407	19.7339	0.072291	-0.0368492	0.0462011	0.44061	0.078
			IVW	1.10004	0.73-1.67	0.0953467	0.21261	0.653823	20.78	0.0773959
			Weighted median	1.23279	0.78-1.95	0.209276	0.23456	0.372281
			Weighted mode	1.21827	0.63-2.37	0.197434	0.338897	0.570144
PCOS	RikenellaceaeRC9gutgroup	11	MR Egger	0.822932	0.28-2.38	-0.194881	0.541683	0.727317	5.20345	0.816224	0.0109848	0.0761204	0.888437	0.717
			IVW	0.88892	0.75-1.06	-0.117748	0.0878978	0.180376	5.22428	0.875701
			Weighted median	0.884765	0.71-1.11	-0.122433	0.113462	0.280554
			Weighted mode	0.892422	0.65-1.22	-0.113816	0.161375	0.49673
PCOS	Prevotella9	15	MR Egger	0.51316	0.24-1.11	-0.667168	0.395838	0.115739	12.1504	0.515351	0.0615965	0.0376876	0.126147	0.475
			IVW	0.947718	0.74-1.22	-0.0536978	0.129335	0.678007	14.8216	0.390455
			Weighted median	0.892796	0.63-1.26	-0.113397	0.176212	0.519884
			Weighted mode	0.809196	0.43-1.51	-0.211714	0.317066	0.515164
PCOS	Prevotella7	11	MR Egger	1.2155	0.36-4.15	0.195159	0.626038	0.762342	12.6755	0.177846	-0.00107913	0.0882929	0.990515	0.305
			IVW	1.20637	0.99-1.47	0.187616	0.0999616	0.0605342	12.6757	0.242371
			Weighted median	1.15468	0.89-1.49	0.143822	0.13143	0.27383
			Weighted mode	1.47294	0.91-2.38	0.38726	0.245803	0.146221
PCOS	Phascolarctobacterium	10	MR Egger	2.63546	0.59-11.68	0.969056	0.759803	0.237953	2.90766	0.940018	-0.0671153	0.0656362	0.336451	0.693
			IVW	1.2344	0.89-1.70	0.210588	0.164627	0.200834	3.95323	0.914463
			Weighted median	1.28683	0.86-1.91	0.25218	0.202462	0.212923
			Weighted mode	1.30592	0.69-2.46	0.266909	0.322762	0.429643
PCOS	Peptococcus	12	MR Egger	0.614919	0.27-1.40	-0.486265	0.420035	0.273898	10.9295	0.363038	0.049151	0.053649	0.381146	0.505
			IVW	0.891854	0.72-1.10	-0.114453	0.107491	0.286979	11.8468	0.375264
			Weighted median	0.854105	0.65-1.12	-0.157701	0.136753	0.248836
			Weighted mode	0.867352	0.59-1.28	-0.14231	0.200543	0.492706
PCOS	Parasutterella	15	MR Egger	1.02108	0.52-2.02	0.0208574	0.346819	0.95296	14.2166	0.358767	-0.000875171	0.0279796	0.975522	0.546
			IVW	1.01081	0.80-1.28	0.0107502	0.121398	0.929437	14.2177	0.433622
			Weighted median	1.02747	0.73-1.44	0.0270952	0.17165	0.874574
			Weighted mode	1.09218	0.65-1.83	0.0881741	0.263294	0.742674
PCOS	Paraprevotella	13	MR Egger	0.73875	0.33-1.64	-0.302796	0.407409	0.472922	13.9037	0.23837	0.033473	0.0434081	0.456878	0.264
			IVW	0.997216	0.79-1.26	-0.00278749	0.118852	0.981289	14.6553	0.260833
			Weighted median	0.897095	0.67-1.20	-0.108593	0.150235	0.469791
			Weighted mode	0.871114	0.50-1.51	-0.137982	0.280899	0.632134
PCOS	Parabacteroides	6	MR Egger	0.304006	0.08-1.18	-1.19071	0.690509	0.159727	0.678046	0.954009	0.122165	0.067537	0.144739	0.492
			IVW	0.988076	0.63-1.55	-0.0119952	0.228422	0.95812	3.95001	0.556635
			Weighted median	0.920675	0.51-1.68	-0.0826484	0.305706	0.786889
			Weighted mode	0.802489	0.37-1.75	-0.220037	0.399099	0.605136
PCOS	Oxalobacter	9	MR Egger	1.0269	0.33-3.22	0.026542	0.583719	0.965002	11.5468	0.116484	0.0272075	0.0873458	0.764499	0.196
			IVW	1.22598	0.96-1.56	0.203744	0.123162	0.0980694	11.7068	0.164772
			Weighted median	1.27885	0.96-1.70	0.245958	0.14644	0.0930381
			Weighted mode	1.31612	0.87-1.99	0.274688	0.211342	0.22989
PCOS	Oscillospira	8	MR Egger	0.823729	0.21-3.22	-0.193914	0.695513	0.789753	6.0702	0.415373	0.0067864	0.0677804	0.923508	0.384
			IVW	0.881229	0.63-1.23	-0.126437	0.170895	0.459387	6.08034	0.530401
			Weighted median	0.955108	0.62-1.48	-0.0459305	0.223733	0.837344
			Weighted mode	1.21174	0.55-2.65	0.192055	0.399015	0.64497
PCOS	Oscillibacter	14	MR Egger	0.594412	0.21-1.67	-0.520183	0.527989	0.343967	16.9937	0.149833	0.0585691	0.047842	0.244362	0.214
			IVW	1.10824	0.84-1.47	0.102773	0.143507	0.473897	19.1161	0.119547
			Weighted median	1.2345	0.89-1.70	0.21067	0.164495	0.200296
			Weighted mode	1.43708	0.83-2.48	0.362611	0.279404	0.216911
PCOS	Olsenella	11	MR Egger	1.11502	0.48-2.57	0.108875	0.425386	0.803748	12.1903	0.202792	-0.00661398	0.0537544	0.904779	0.287
			IVW	1.05994	0.87-1.29	0.0582078	0.101291	0.565521	12.2108	0.271195
			Weighted median	1.06305	0.82-1.38	0.0611378	0.133958	0.648105
			Weighted mode	0.801223	0.50-1.27	-0.221616	0.236121	0.370068
PCOS	Odoribacter	7	MR Egger	0.736291	0.19-2.88	-0.30613	0.696688	0.678708	2.74681	0.73895	0.00164993	0.0513044	0.975589	0.942
			IVW	0.752115	0.49-1.16	-0.284866	0.219566	0.194492	2.74784	0.839764
			Weighted median	0.704318	0.41-1.21	-0.350526	0.27722	0.206075
			Weighted mode	0.684225	0.30-1.54	-0.379469	0.412427	0.393016
PCOS	Methanobrevibacter	6	MR Egger	0.967251	0.42-2.25	-0.0332977	0.431555	0.942204	4.22425	0.376507	0.0122071	0.0642649	0.858599	0.686
			IVW	1.0465	0.83-1.32	0.04545	0.116647	0.696804	4.26235	0.512295
			Weighted median	1.05186	0.79-1.40	0.0505565	0.145811	0.728796
			Weighted mode	1.061	0.72-1.57	0.0592153	0.19991	0.778978
PCOS	Marvinbryantia	10	MR Egger	0.801496	0.23-2.85	-0.221275	0.646786	0.741078	4.07286	0.850491	0.0197835	0.0555417	0.730908	0.945
			IVW	1.00139	0.72-1.39	0.00138413	0.166038	0.993349	4.19973	0.897782
			Weighted median	0.904777	0.60-1.37	-0.100067	0.213271	0.638927
			Weighted mode	0.816088	0.43-1.54	-0.203234	0.322676	0.544457
PCOS	Lactococcus	9	MR Egger	0.865292	0.35-2.13	-0.144688	0.458647	0.761603	3.48524	0.836786	0.0240076	0.0612038	0.706538	0.829
			IVW	1.03094	0.84-1.27	0.0304692	0.104692	0.771023	3.63911	0.88813
			Weighted median	1.01591	0.79-1.31	0.0157873	0.128831	0.90247
			Weighted mode	1.0144	0.70-1.47	0.014297	0.187831	0.941196
PCOS	Lactobacillus	10	MR Egger	1.38283	0.52-3.71	0.324134	0.503066	0.537402	14.017	0.0813239	-0.0289872	0.0540448	0.606301	0.195
			IVW	1.0718	0.79-1.46	0.0693416	0.15887	0.662498	14.521	0.104961
			Weighted median	1.0418	0.74-1.47	0.0409501	0.176012	0.816029
			Weighted mode	1.05743	0.63-1.79	0.0558456	0.268076	0.839617
PCOS	LachnospiraceaeUCG010	10	MR Egger	1.60079	0.64 -4.03	0.470494	0.471255	0.347329	10.1197	0.256721	-0.0596901	0.0383466	0.158179	0.243
			IVW	0.815066	0.55-1.20	-0.204487	0.198578	0.303124	13.1848	0.154423
			Weighted median	1.02296	0.65-1.61	0.022702	0.230102	0.921408
			Weighted mode	1.14709	0.64-2.04	0.137227	0.294842	0.652684
PCOS	LachnospiraceaeUCG008	11	MR Egger	0.895111	0.27 -2.99	-0.110808	0.615327	0.86108	1.95631	0.99214	0.0235506	0.0623148	0.714242	0.971
			IVW	1.1246	0.89 -1.42	0.117427	0.118002	0.319675	2.09914	0.995522
			Weighted median	1.21621	0.91-1.62	0.195739	0.146718	0.182166
			Weighted mode	1.26071	0.79-2.00	0.231675	0.235263	0.347975
PCOS	LachnospiraceaeUCG004	12	MR Egger	0.364581	0.10 -1.33	-1.00901	0.661126	0.157948	10.5411	0.394367	0.053818	0.0431893	0.241131	0.359
			IVW	0.808055	0.57 -1.14	-0.213125	0.174977	0.223215	12.1779	0.350421
			Weighted median	0.794845	0.52 -1.21	-0.229608	0.216418	0.288713
			Weighted mode	0.789222	0.39 -1.60	-0.236708	0.359055	0.523295
PCOS	LachnospiraceaeUCG001	13	MR Egger	0.662402	0.18 -2.51	-0.411883	0.678948	0.556397	14.2585	0.219016	0.0316711	0.0604958	0.610993	0.429
			IVW	0.936422	0.70 -1.25	-0.0656886	0.149171	0.659678	14.6138	0.263238
			Weighted median	0.90219	0.61 -1.33	-0.10293	0.197741	0.602693
			Weighted mode	0.867462	0.45 -1.69	-0.142184	0.340551	0.683678
PCOS	LachnospiraceaeNK4A136group	15	MR Egger	0.914394	0.52-1.61	-0.0894934	0.287953	0.760886	10.0512	0.689739	0.00907342	0.0206322	0.667326	0.784
			IVW	1.02125	0.78 -1.35	0.0210245	0.140575	0.881111	10.2446	0.744088
			Weighted median	1.06507	0.74 -1.54	0.0630361	0.189055	0.738811
			Weighted mode	1.12324	0.62-2.04	0.116221	0.303282	0.70732
PCOS	LachnospiraceaeND3007group	3	MR Egger	27.1485	2.6E-06-2.9E+08	3.30132	8.2553	0.757815	1.83223	0.175864	-0.181131	0.484948	0.772433	0.614
			IVW	1.25033	6.0E-01-2.6E+00	0.223407	0.3717	0.547813	2.08784	0.352072
			Weighted median	1.35222	5.3E-01 -3.4E+00	0.301748	0.473404	0.523864
			Weighted mode	1.65161	4.7E-01-5.8E+00	0.501752	0.644453	0.517723
PCOS	LachnospiraceaeNC2004group	9	MR Egger	1.48231	0.48 -4.62	0.393605	0.580035	0.519195	8.2967	0.30716	-0.0446636	0.0650833	0.514634	0.359
			IVW	1.00694	0.78-1.31	0.00692083	0.132994	0.958498	8.85488	0.354686
			Weighted median	0.866464	0.62 -1.20	-0.143335	0.167992	0.393537
			Weighted mode	0.892919	0.55 -1.45	-0.11326	0.248552	0.660735
PCOS	LachnospiraceaeFCS020group	12	MR Egger	1.13387	0.53-2.42	0.12564	0.386547	0.751855	4.70219	0.910164	0.00133184	0.0286973	0.963897	0.84
			IVW	1.15273	0.86 -1.55	0.142136	0.151951	0.349579	4.70435	0.944635
			Weighted median	0.961115	0.65-1.43	-0.0396616	0.202372	0.844623
			Weighted mode	0.937168	0.53-1.65	-0.064893	0.288446	0.826124
PCOS	Lachnospira	6	MR Egger	0.383895	0.00 -36.44	-0.957386	2.32305	0.701378	9.73304	0.0451728	0.0746797	0.138405	0.618124	0.091
			IVW	1.32103	0.65 -2.68	0.27841	0.360042	0.439362	10.4415	0.0636503
			Weighted median	1.52592	0.78-2.98	0.4226	0.3409	0.215102
			Weighted mode	1.57462	0.68 -3.66	0.454012	0.429682	0.339039
PCOS	Lachnoclostridium	13	MR Egger	2.28999	0.61 -8.61	0.828548	0.675475	0.245576	11.6887	0.387494	-0.055111	0.0436611	0.232966	0.485
			IVW	1.00994	0.69 -1.48	0.00989149	0.193347	0.959199	13.3817	0.34192
			Weighted median	1.00981	0.60-1.71	0.00976108	0.26902	0.971056
			Weighted mode	0.977127	0.44 -2.16	-0.0231384	0.405548	0.955441
PCOS	Intestinimonas	17	MR Egger	0.752423	0.41 -1.39	-0.284457	0.312144	0.37655	7.16383	0.952943	0.0339406	0.0282644	0.248439	0.969
			IVW	1.06227	0.84 -1.35	0.0604108	0.122288	0.621304	8.60581	0.928755
			Weighted median	1.00038	0.73-1.37	0.000378185	0.161439	0.998131
			Weighted mode	0.931296	0.55-1.58	-0.0711781	0.268833	0.79457
PCOS	Intestinibacter	15	MR Egger	0.726427	0.27-1.92	-0.319617	0.495961	0.530497	16.516	0.222383	0.0213458	0.0395539	0.598551	0.274
			IVW	0.937466	0.70 -1.25	-0.0645744	0.146577	0.65954	16.886	0.262302
			Weighted median	1.03371	0.71-1.50	0.0331526	0.191432	0.862508
			Weighted mode	1.02807	0.59-1.80	0.0276801	0.285195	0.924057
PCOS	Hungatella	5	MR Egger	0.306168	0.05-1.77	-1.18362	0.894878	0.277736	2.07639	0.556704	0.162924	0.115766	0.254039	0.418
			IVW	1.06054	0.79 -1.42	0.0587771	0.147615	0.690498	4.05703	0.398343
			Weighted median	1.16768	0.79-1.73	0.155019	0.199343	0.436776
			Weighted mode	1.28707	0.74-2.23	0.252367	0.279518	0.417652
PCOS	Howardella	10	MR Egger	0.757953	0.31 -1.84	-0.277134	0.453479	0.558075	9.22321	0.323818	0.0307728	0.0657343	0.652175	0.258
			IVW	0.932037	0.77 -1.13	-0.0703825	0.0983516	0.474225	9.47587	0.394555
			Weighted median	0.983174	0.76 -1.27	-0.0169691	0.130476	0.896523
			Weighted mode	0.981168	0.64 -1.51	-0.019012	0.218907	0.932693
PCOS	Holdemania	15	MR Egger	1.07895	0.56-2.08	0.0759915	0.334198	0.823662	11.7967	0.544379	-0.0172278	0.0326753	0.606906	0.638
			IVW	0.914669	0.73-1.15	-0.0891926	0.116331	0.44325	12.0747	0.600303
			Weighted median	0.819123	0.60 -1.12	-0.19952	0.157714	0.205843
			Weighted mode	0.768564	0.50 -1.19	-0.263231	0.221817	0.255092
PCOS	Holdemanella	11	MR Egger	0.914736	0.47 -1.76	-0.0891199	0.335035	0.796231	8.56517	0.478341	-0.00253355	0.0373247	0.947366	0.226
			IVW	0.895515	0.71-1.13	-0.110356	0.11988	0.357283	8.56977	0.573361
			Weighted median	0.84655	0.62 -1.16	-0.166585	0.160504	0.29932
			Weighted mode	0.745242	0.43-1.28	-0.294046	0.274849	0.309833
PCOS	Haemophilus	9	MR Egger	1.42582	0.63 -3.22	0.354748	0.415126	0.421079	13.5788	0.0591996	-0.0277274	0.0481469	0.582721	0.258
			IVW	1.15014	0.82 -1.62	0.139884	0.174244	0.422087	14.2222	0.0761549
			Weighted median	1.36319	0.93 -1.99	0.309828	0.194066	0.110375
			Weighted mode	1.3992	0.81 -2.41	0.335902	0.27733	0.260381
PCOS	Gordonibacter	12	MR Egger	1.14103	0.56-2.33	0.131933	0.364994	0.725273	7.91662	0.636981	-0.00429977	0.055001	0.93923	0.535
			IVW	1.1098	0.94 -1.31	0.104175	0.0845809	0.218074	7.92273	0.720209
			Weighted median	1.17721	0.95-1.46	0.16315	0.108697	0.133366
			Weighted mode	1.2214	0.89-1.69	0.199995	0.164359	0.249136
PCOS	Fusicatenibacter	18	MR Egger	1.13345	0.36 -3.52	0.125266	0.578162	0.831209	11.9092	0.750205	0.00151715	0.0389839	0.969438	0.779
			IVW	1.15837	0.87 -1.55	0.147011	0.148636	0.32263	11.9107	0.805512
			Weighted median	1.15422	0.77 -1.73	0.143425	0.205356	0.484915
			Weighted mode	1.10898	0.54 -2.28	0.103439	0.3688	0.782497
PCOS	Flavonifractor	5	MR Egger	3.3592	0.36 -31.35	1.2117	1.13955	0.365642	4.26761	0.233979	-0.0871756	0.0906275	0.407054	0.225
			IVW	1.15493	0.70 -1.91	0.144036	0.255658	0.573168	5.58385	0.232457
			Weighted median	1.0109	0.56 -1.83	0.0108397	0.302343	0.9714
			Weighted mode	0.762147	0.30 -1.97	-0.271616	0.483524	0.604275
PCOS	FamilyXIIIUCG001	8	MR Egger	1.11267	0.36 -3.47	0.106767	0.580319	0.86009	8.00419	0.237796	0.0117895	0.0497745	0.820646	0.209
			IVW	1.26447	0.86 -1.86	0.234653	0.197859	0.235636	8.07903	0.325676
			Weighted median	1.3292	0.82 -2.15	0.284575	0.24633	0.247983
			Weighted mode	1.34875	0.74 -2.47	0.299177	0.307837	0.363493
PCOS	FamilyXIIIAD3011group	13	MR Egger	0.732282	0.16 -3.39	-0.311589	0.781304	0.697668	8.29172	0.686958	0.0334495	0.0628944	0.605414	0.405
			IVW	1.09973	0.80 -1.51	0.0950684	0.160553	0.553762	8.57457	0.738774
			Weighted median	1.22085	0.79 -1.89	0.199551	0.223694	0.372354
			Weighted mode	1.38156	0.66 -2.91	0.323211	0.380569	0.412347
PCOS	Faecalibacterium	10	MR Egger	1.21569	0.55 -2.69	0.195314	0.404889	0.642452	11.7421	0.163085	-0.0063032	0.040053	0.878852	0.286
			IVW	1.15095	0.78 -1.69	0.140588	0.195821	0.472792	11.7785	0.226087
			Weighted median	1.257	0.80 -1.98	0.228732	0.232545	0.325311
			Weighted mode	1.25686	0.73 -2.16	0.228615	0.275868	0.428696
PCOS	Escherichia.Shigella	10	MR Egger	0.683231	0.24 -1.91	-0.380922	0.524243	0.488176	3.08066	0.929194	0.0253855	0.0392355	0.535748	0.985
			IVW	0.941309	0.67 -1.32	-0.0604838	0.171883	0.724921	3.49927	0.941183
			Weighted median	0.897478	0.59 -1.38	-0.108167	0.217832	0.619498
			Weighted mode	0.865903	0.45 -1.67	-0.143982	0.336195	0.678522
PCOS	ErysipelotrichaceaeUCG003	16	MR Egger	1.54605	0.74 -3.24	0.435706	0.377188	0.267367	9.32693	0.809555	-0.0360149	0.0330372	0.294063	0.832
			IVW	1.05478	0.80 -1.38	0.0533288	0.138697	0.700609	10.5153	0.786135
			Weighted median	1.07422	0.74 -1.57	0.0715955	0.192031	0.709273
			Weighted mode	1.38884	0.69 -2.82	0.328471	0.360492	0.376614
PCOS	Erysipelatoclostridium	13	MR Egger	0.742059	0.19 -2.96	-0.298326	0.706459	0.680954	19.1079	0.0591841	0.0199333	0.0554177	0.725887	0.093
			IVW	0.949431	0.69 -1.31	-0.0518923	0.165939	0.754495	19.3326	0.0808111
			Weighted median	0.903429	0.62-1.32	-0.101558	0.192189	0.597204
			Weighted mode	0.806364	0.39 -1.66	-0.21522	0.369332	0.570864
PCOS	Enterorhabdus	6	MR Egger	0.968107	0.43-2.16	-0.0324126	0.40899	0.94064	3.5733	0.466821	0.0129963	0.053897	0.821309	0.679
			IVW	1.06041	0.78-1.44	0.0586546	0.156974	0.708659	3.63144	0.603599
			Weighted median	1.10258	0.74-1.65	0.0976529	0.205321	0.634351
			Weighted mode	1.10214	0.66-1.83	0.097251	0.259785	0.723494
PCOS	Eubacteriumruminantiumgroup	18	MR Egger	1.01175	0.47-2.18	0.0116815	0.392067	0.976599	18.6124	0.289271	0.0119913	0.0365431	0.747061	0.376
			IVW	1.14499	0.93-1.41	0.135399	0.104695	0.195917	18.7377	0.343794
			Weighted median	1.21487	0.92 -1.61	0.194636	0.143421	0.174751
			Weighted mode	1.34098	0.81 -2.21	0.293403	0.254994	0.265813
PCOS	Eisenbergiella	11	MR Egger	0.697578	0.06-7.56	-0.360141	1.21553	0.773737	19.0556	0.024724	0.0377277	0.126231	0.771819	0.057
			IVW	1.00004	0.74 -1.35	3.75188e-05	0.151484	0.999802	19.2448	0.0372617
			Weighted median	1.06902	0.80 -1.43	0.0667388	0.148729	0.653628
			Weighted mode	1.16845	0.77 -1.78	0.155677	0.215324	0.486252
PCOS	Eggerthella	10	MR Egger	1.78209	0.61-5.18	0.577788	0.544261	0.319411	5.2721	0.728137	-0.0751753	0.0591925	0.239772	0.653
			IVW	0.906627	0.72-1.13	-0.0980244	0.114267	0.390975	6.88504	0.649088
			Weighted median	0.993193	0.75-1.32	-0.00683068	0.14547	0.962548
			Weighted mode	1.04055	0.67 -1.62	0.0397456	0.225852	0.864205
PCOS	Dorea	10	MR Egger	0.767768	0.27 -2.22	-0.264268	0.542044	0.638955	8.10517	0.423265	-0.00581463	0.037078	0.879271	0.409
			IVW	0.709242	0.48-1.04	-0.343558	0.194102	0.0767297	8.13008	0.521092
			Weighted median	0.832088	0.50 -1.38	-0.183817	0.258389	0.476841
			Weighted mode	0.872395	0.37-2.03	-0.136513	0.430802	0.758561
PCOS	Dialister	11	MR Egger	0.941665	0.17-5.29	-0.0601056	0.880571	0.947073	13.4122	0.144825	0.00393695	0.0635117	0.951927	0.16
			IVW	0.993106	0.69 -1.43	-0.00691742	0.187792	0.970616	13.4179	0.201235
			Weighted median	0.810716	0.52-1.27	-0.209837	0.23039	0.362406
			Weighted mode	0.689526	0.35-1.38	-0.371751	0.352202	0.316027
PCOS	Desulfovibrio	10	MR Egger	0.973674	0.40-2.35	-0.0266782	0.449666	0.954145	7.43948	0.490041	-0.00390982	0.0434679	0.93054	0.681
			IVW	0.937138	0.70 -1.25	-0.0649245	0.14628	0.657161	7.44757	0.590626
			Weighted median	0.919069	0.63 -1.35	-0.0843939	0.194441	0.664264
			Weighted mode	0.848767	0.49-1.47	-0.16397	0.278911	0.571059
PCOS	DefluviitaleaceaeUCG011	9	MR Egger	5.19597	1.85-14.62	1.64788	0.527864	0.0168015	7.52469	0.376363	-0.156168	0.0535624	0.0224797	0.058
			IVW	1.18652	0.79-1.78	0.171022	0.206766	0.408166	16.6627	0.0338191
			Weighted median	1.29748	0.85 -1.97	0.260423	0.214345	0.224378
			Weighted mode	1.46125	0.73 -2.92	0.37929	0.353874	0.315066
PCOS	Coprococcus3	8	MR Egger	0.855051	0.14-5.17	-0.156594	0.918014	0.870162	7.79527	0.253489	0.0210274	0.0567788	0.723852	0.355
			IVW	1.18558	0.75-1.89	0.17023	0.236773	0.472166	7.97346	0.33494
			Weighted median	1.29672	0.71-2.35	0.259835	0.303971	0.392659
			Weighted mode	1.37341	0.54-3.50	0.317293	0.4766	0.526897
PCOS	Coprococcus1	12	MR Egger	1.33456	0.40-4.42	0.288601	0.611382	0.647025	22.1107	0.0145506	-0.011475	0.0445089	0.801779	0.013
			IVW	1.15515	0.73-1.83	0.144231	0.234735	0.538925	22.2576	0.0224516
			Weighted median	1.0067	0.63 -1.61	0.00667808	0.238168	0.977631
			Weighted mode	1.00545	0.54-1.88	0.00543664	0.318674	0.986694
PCOS	Coprobacter	11	MR Egger	0.982959	0.41-2.33	-0.0171877	0.440266	0.969711	11.717	0.229738	-0.0030138	0.0484685	0.951778	0.393
			IVW	0.957624	0.75-1.22	-0.0432999	0.125464	0.730006	11.722	0.304091
			Weighted median	1.10985	0.81-1.52	0.104228	0.16175	0.519331
			Weighted mode	1.13826	0.73-1.77	0.129501	0.225928	0.579171
PCOS	Collinsella	9	MR Egger	0.689833	0.17-2.75	-0.371305	0.705902	0.615135	4.39554	0.733257	0.0122447	0.050619	0.815793	0.572
			IVW	0.812989	0.56-1.19	-0.207038	0.192751	0.282769	4.45405	0.814012
			Weighted median	0.769758	0.47-1.27	-0.261679	0.255116	0.305022
			Weighted mode	0.697705	0.32-1.51	-0.35996	0.392489	0.385893
PCOS	Clostridiumsensustricto1	7	MR Egger	1.11046	0.49-2.54	0.10477	0.421286	0.813491	2.77318	0.734905	-0.0233084	0.0443378	0.621568	0.469
			IVW	0.910415	0.63-1.31	-0.0938548	0.186352	0.614513	3.04954	0.802604
			Weighted median	0.96713	0.60-1.56	-0.0334223	0.243657	0.890897
			Weighted mode	1.04652	0.57-1.92	0.0454706	0.308749	0.88774
PCOS	ChristensenellaceaeR	10	MR Egger	1.14108	0.37-3.55	0.131973	0.578468	0.825259	5.75878	0.674231	0.0095334	0.0437723	0.833041	0.777
			IVW	1.28423	0.87-1.90	0.250163	0.200357	0.211817	5.80621	0.759146
			Weighted median	1.28357	0.76-2.18	0.249648	0.269374	0.354045
			Weighted mode	1.45056	0.63-3.36	0.371951	0.428187	0.407597
PCOS	Catenibacterium	5	MR Egger	0.738823	0.09-6.19	-0.302697	1.08462	0.798316	1.11144	0.774314	0.0641233	0.144991	0.688245	0.869
			IVW	1.18999	0.94-.51	0.173948	0.121833	0.15336	1.30703	0.860182
			Weighted median	1.30502	0.97-1.75	0.266215	0.150321	0.0765641
			Weighted mode	1.32937	0.89-1.98	0.284707	0.203001	0.233412
PCOS	Butyrivibrio	15	MR Egger	1.06507	0.54-2.12	0.0630375	0.350619	0.86009	12.5748	0.481163	-0.00200214	0.0483677	0.967611	0.371
			IVW	1.05007	0.91-1.21	0.0488532	0.0742704	0.510683	12.5765	0.560104
			Weighted median	1.02839	0.84-1.26	0.0279946	0.104338	0.788462
			Weighted mode	1.03999	0.74-1.47	0.039211	0.17543	0.826364
PCOS	Butyricimonas	13	MR Egger	0.892979	0.33-2.41	-0.113193	0.506334	0.827203	13.4479	0.265064	0.0207147	0.0448578	0.653234	0.456
			IVW	1.11617	0.84-1.49	0.109903	0.14652	0.453201	13.7086	0.319706
			Weighted median	1.22086	0.83-1.80	0.199559	0.197073	0.311244
			Weighted mode	1.46893	0.72-2.99	0.384532	0.36256	0.309751
PCOS	Butyricicoccus	8	MR Egger	0.755513	0.39-1.47	-0.280359	0.341123	0.442577	3.71812	0.714759	0.0266148	0.0301724	0.41167	0.698
			IVW	0.974966	0.68-1.39	-0.0253527	0.18108	0.888653	4.4962	0.721175
			Weighted median	1.08481	0.68-1.73	0.0814024	0.237172	0.731432
			Weighted mode	1.10445	0.56-2.17	0.0993516	0.345534	0.782032
PCOS	Blautia	13	MR Egger	1.63538	0.71-3.77	0.491873	0.426454	0.273192	15.0021	0.182401	-0.027435	0.0323891	0.415021	0.18
			IVW	1.1833	0.82-1.71	0.168306	0.187338	0.368967	15.9806	0.192126
			Weighted median	1.29503	0.81-2.07	0.258536	0.240501	0.282378
			Weighted mode	1.32901	0.68-2.60	0.284434	0.342057	0.421908
PCOS	Bilophila	13	MR Egger	0.71941	0.17-3.01	-0.329323	0.730468	0.660863	8.74168	0.645722	0.0201513	0.0531061	0.711575	0.833
			IVW	0.943024	0.69-1.28	-0.058664	0.157492	0.709529	8.88567	0.712664
			Weighted median	0.852659	0.56-1.29	-0.159395	0.210961	0.449908
			Weighted mode	0.78823	0.39-1.60	-0.237965	0.36189	0.523233
PCOS	Bifidobacterium	13	MR Egger	0.998269	0.45-2.21	-0.00173298	0.405723	0.996668	11.6056	0.394007	-0.00413361	0.0316605	0.89848	0.6
			IVW	0.950411	0.71 -1.27	-0.0508603	0.147725	0.730627	11.6236	0.476364
			Weighted median	1.08483	0.73 -1.61	0.0814235	0.201829	0.686634
			Weighted mode	0.981245	0.58-1.66	-0.0189335	0.269593	0.945168
PCOS	Barnesiella	14	MR Egger	1.53846	0.54-4.36	0.43078	0.531948	0.433811	9.55983	0.654515	-0.0428291	0.0417715	0.325439	0.698
			IVW	0.913023	0.67-1.24	-0.0909942	0.154917	0.556951	10.6111	0.64336
			Weighted median	1.06744	0.70-1.62	0.0652663	0.213285	0.759601
			Weighted mode	1.01201	0.52-1.98	0.0119356	0.343293	0.972793
PCOS	Eubacteriumventriosumgroup	15	MR Egger	0.411375	0.09-1.96	-0.88825	0.796379	0.28489	15.0291	0.305541	0.0531645	0.057792	0.374365	0.318
			IVW	0.841009	0.60-1.18	-0.173153	0.172146	0.314488	16.0074
			Weighted median	0.934628	0.60-1.46	-0.0676068	0.228011	0.766843
			Weighted mode	1.10189	0.50-2.41	0.0970284	0.399985	0.811849
PCOS	Bacteroides	9	MR Egger	0.195127	0.01-2.71	-1.6341	1.343	0.263125	9.97336	0.190088	0.10659	0.0856328	0.253287	0.092
			IVW	1.00653	0.60-1.70	0.00651306	0.266355	0.980492	12.1808	0.143317
			Weighted median	0.695177	0.37-1.31	-0.363589	0.323739	0.261398
			Weighted mode	0.621875	0.25-1.55	-0.475017	0.465112	0.337002
PCOS	Anaerotruncus	13	MR Egger	0.407109	0.15-1.09	-0.898674	0.5028	0.101434	5.29391	0.916101	0.0470861	0.0341241	0.195034	0.922
			IVW	0.783068	0.56-1.09	-0.244536	0.167542	0.144413	7.19789	0.844264
			Weighted median	0.85605	0.55-1.32	-0.155426	0.221828	0.483514
			Weighted mode	0.954754	0.49-1.87	-0.0463018	0.341913	0.894525
PCOS	Anaerostipes	13	MR Egger	0.590263	0.16-2.12	-0.527187	0.651268	0.435401	6.09146	0.867192	0.0318323	0.0415721	0.459962	0.767
			IVW	0.953656	0.67-1.35	-0.0474519	0.177828	0.789591	6.67778	0.878152
			Weighted median	1.03974	0.65-1.65	0.0389748	0.236219	0.868949
			Weighted mode	1.03438	0.47-2.26	0.0337982	0.399595	0.933989
PCOS	Anaerofilum	11	MR Egger	0.966486	0.34-2.75	-0.0340882	0.533437	0.950444	8.69486	0.465904	0.00985549	0.0595677	0.872246	0.634
			IVW	1.05396	0.86-1.29	0.0525557	0.101532	0.604717	8.72224	0.558652
			Weighted median	1.10082	0.84-1.44	0.0960537	0.138604	0.488304
			Weighted mode	1.23335	0.76-2.01	0.209738	0.249565	0.420315
PCOS	Alloprevotella	6	MR Egger	0.429976	0.06-3.14	-0.844027	1.01474	0.452314	1.04341	0.903144	0.107061	0.140738	0.489202	0.722
			IVW	0.926253	0.75-1.15	-0.076608	0.109528	0.484278	1.6221	0.898565
			Weighted median	0.955803	0.74-1.24	-0.0452035	0.132898	0.733753
			Weighted mode	0.96772	0.67-1.39	-0.0328126	0.184158	0.865579
PCOS	Allisonella	8	MR Egger	2.5326	0.74-8.72	0.929245	0.630676	0.191072	1.74755	0.941391	-0.132414	0.089386	0.189014	0.822
			IVW	1.00554	0.84-1.21	0.00552624	0.0944978	0.953366	3.94202	0.786431
			Weighted median	1.04639	0.83-1.32	0.0453447	0.118259	0.701398
			Weighted mode	1.09521	0.77-1.55	0.090947	0.176691	0.622594
PCOS	Alistipes	14	MR Egger	1.48125	0.28-7.88	0.392889	0.852869	0.653274	8.36813	0.755741	-0.0393495	0.0499483	0.446093	0.805
			IVW	0.76751	0.54-1.08	-0.264604	0.175638	0.131931	8.98877	0.773791
			Weighted median	0.784128	0.49-1.24	-0.243183	0.235827	0.302451
			Weighted mode	0.710674	0.34-1.49	-0.341541	0.378663	0.383482
PCOS	Akkermansia	11	MR Egger	0.732084	0.28 -1.92	-0.31186	0.491474	0.541521	8.61812	0.473244	0.0136051	0.038774	0.73375	0.532
			IVW	0.862477	0.64 -1.16	-0.147947	0.15272	0.332671	8.74124	0.556824
			Weighted median	0.828973	0.55-1.25	-0.187568	0.208033	0.367256
			Weighted mode	0.819833	0.47-1.44	-0.198654	0.288304	0.506467
PCOS	Adlercreutzia	8	MR Egger	0.407307	0.10-1.68	-0.898188	0.722623	0.260252	4.01521	0.674618	0.063382	0.0637114	0.358231	0.836
			IVW	0.821001	0.60-1.12	-0.19723	0.160379	0.21878	5.00489	0.659366
			Weighted median	0.853093	0.56-1.30	-0.158887	0.216043	0.46207
			Weighted mode	0.8846	0.46-1.70	-0.12262	0.334	0.724373
PCOS	Actinomyces	7	MR Egger	1.41548	0.65-3.07	0.347472	0.395364	0.419698	4.80192	0.440529	-0.00394664	0.0435267	0.931274	0.683
			IVW	1.36912	1.03-1.82	0.314171	0.146384	0.0318565	4.81014	0.568384
			Weighted median	1.48285	1.01-2.18	0.393965	0.196769	0.0452662
			Weighted mode	1.71721	0.95-3.12	0.5407	0.304072	0.125691
PCOS	Ruminococcustorquesgroup	9	MR Egger	1.00099	0.35-2.83	0.000992241	0.529515	0.998557	7.08131	0.420463	-0.00804195	0.0347168	0.82344	0.467
			IVW	0.893607	0.60 -1.32	-0.11249	0.199811	0.573449	7.13559	0.522077
			Weighted median	0.903782	0.52 -1.56	-0.101167	0.278419	0.716335
			Weighted mode	0.822752	0.31-2.22	-0.1951	0.505979	0.709851
PCOS	Ruminococcusgnavusgroup	12	MR Egger	0.552155	0.20-1.53	-0.593927	0.518752	0.278907	8.31699	0.597904	0.0600407	0.0547721	0.298691	0.596
			IVW	0.962256	0.77 -1.20	-0.0384745	0.111119	0.729159	9.51862	0.574134
			Weighted median	0.917212	0.69-1.22	-0.0864164	0.14545	0.552424
			Weighted mode	1.04906	0.66-1.68	0.0478991	0.239808	0.845329
PCOS	Eubacteriumxylanophilumgroup	9	MR Egger	1.96086	0.50-7.66	0.673383	0.695024	0.36489	10.108	0.182536	-0.0584019	0.0550235	0.32375	0.218
			IVW	0.974559	0.63-1.51	-0.0257701	0.223469	0.908193	11.7347	0.163437
			Weighted median	0.910418	0.55-1.52	-0.0938519	0.26062	0.718765
			Weighted mode	0.925191	0.47 -1.83	-0.077755	0.34804	0.828817
PCOS	Eubacteriumrectalegroup	8	MR Egger	0.613251	0.10-3.65	-0.488982	0.910513	0.610561	8.13467	0.228402	0.0423156	0.0573112	0.488166	0.384
			IVW	1.16935	0.72-1.90	0.156448	0.246321	0.525339	8.87378	0.261845
			Weighted median	1.09804	0.61-1.97	0.0935255	0.298176	0.75378
			Weighted mode	0.696246	0.22-2.21	-0.362053	0.588441	0.557839
PCOS	Eubacteriumoxidoreducensgroup	4	MR Egger	1.31522	0.44-3.91	0.274008	0.556357	0.67112	0.987694	0.610274	-0.0167533	0.0623874	0.81345	0.879
			IVW	1.14183	0.80-1.62	0.13263	0.179876	0.460916	1.05981	0.786785
			Weighted median	1.19925	0.81-1.78	0.181696	0.201553	0.367334
			Weighted mode	1.24951	0.75-2.08	0.222754	0.25985	0.454334
PCOS	Eubacteriumnodatumgroup	11	MR Egger	1.05594	0.51-2.19	0.0544359	0.371032	0.886591	2.69793	0.975078	0.0095876	0.0543051	0.86377	0.989
			IVW	1.12553	0.96-1.33	0.11825	0.0837852	0.158143	2.7291	0.9871
			Weighted median	1.11964	0.90-1.39	0.113008	0.109727	0.303055
			Weighted mode	1.00731	0.72-1.40	0.00727919	0.168672	0.966427
PCOS	Eubacteriumhalliigroup	16	MR Egger	0.942247	0.52-1.71	-0.0594883	0.304399	0.847865	9.52233	0.796207	0.00486759	0.0237521	0.840574	0.829
			IVW	0.995716	0.75-1.31	-0.00429316	0.141843	0.975854	9.56433	0.846214
			Weighted median	1.1421	0.78-1.67	0.132866	0.193064	0.491328
			Weighted mode	1.31597	0.68-2.55	0.274574	0.337873	0.429126
PCOS	Eubacteriumfissicatenagroup	9	MR Egger	0.613203	0.14-2.71	-0.48906	0.758347	0.539543	13.7035	0.0567143	0.0780374	0.0981709	0.452769	0.071
			IVW	1.10812	0.84-1.46	0.102664	0.141465	0.468012	14.9405	0.0603137
			Weighted median	1.05502	0.79-1.41	0.0535595	0.147607	0.716715
			Weighted mode	0.883669	0.53-1.47	-0.123672	0.260955	0.64822
PCOS	Eubacteriumeligensgroup	7	MR Egger	0.226351	0.02-3.36	-1.48567	1.37587	0.329541	11.2312	0.0469835	0.111553	0.10738	0.346472	0.071
			IVW	0.903669	0.46-1.78 0.32-1.31	-0.101292	0.344662	0.768844	13.6555	0.0337308
			Weighted median	0.648239	0.32-1.31	-0.433495	0.358726	0.226881
			Weighted mode	0.520166	0.20-1.34	-0.653606	0.482772	0.224551
PCOS	Eubacteriumcoprostanoligenesgroup	13	MR Egger	1.85794	0.44-7.79	0.619466	0.731007	0.414822	3.97576	0.970621	-0.0424206	0.0450592	0.366694	0.973
			IVW	0.952775	0.67-1.35	-0.0483761	0.176492	0.784009	4.86208	0.962428
			Weighted median	1.04172	0.67-1.62	0.0408771	0.226582	0.856833
			Weighted mode	1.06486	0.50-2.27	0.0628411	0.385283	0.873151
PCOS	Eubacteriumbrachygroup	10	MR Egger	0.915573	0.38-2.22	-0.0882055	0.452202	0.850211	9.35673	0.313102	0.00428622	0.0561523	0.941029	0.43
			IVW	0.946786	0.78-1.16	-0.0546821	0.10162	0.590507	9.36354	0.404415
			Weighted median	0.983411	0.75-1.29	-0.0167278	0.136856	0.902718
			Weighted mode	0.987446	0.66-1.49	-0.0126331	0.208535	0.953017
PCOS	Clostridiuminnocuumgroup	9	MR Egger	1.9897	0.68-5.81	0.687982	0.546562	0.248475	3.70202	0.813388	-0.0815976	0.069088	0.276144	0.815
			IVW	1.05671	0.86-1.31	0.0551566	0.107887	0.60918	5.09694	0.747166
			Weighted median	1.16902	0.88-1.55	0.156162	0.144811	0.280862
			Weighted mode	1.27388	0.81-2.00	0.242068	0.230256	0.323837
PCOS	CandidatusSoleaferrea	9	MR Egger	0.226764	0.01-3.48	-1.48385	1.39285	0.322086	2.37107	0.936489	0.11565	0.128281	0.39726	0.968
			IVW	0.77392	0.62-1.02	-0.233453	0.12798	0.0681305	3.18384	0.922296
			Weighted median	0.791795	0.56-1.08	-0.256286	0.169238	0.129935
			Weighted mode	0.750792	0.47-1.21	-0.286627	0.242691	0.271506
Notes:PCOS:polycystic ovary syndrome; IVW:inverse-variance weighted;Beta: estimate coefficient; P-value: P-value from GWAS ; SE: standard error of coefficient estimate.

## Sheet: Supplementary Table 1B
Supplementary Table 1B. Main information of instrumental variables for female infertility used in MR analyses(P<1e-5)
Trait(outcome)	Bacterial genera（exposure）	SNP	Effect allele	Other allele	Exposure			Outcome			R2	F-statistics
					Beta	SE	P-value	Beta	SE	P-value
Female infertility	Faecalibacterium	rs1271565	C	T	-0.0576251	0.0119649	1.3e-06	-0.00143765	0.0171739	0.933286	0.00131336	23.1929
Female infertility	Faecalibacterium	rs6910935	A	G	0.134864	0.0277032	1.38e-06	-0.0341458	0.0315332	0.278875	0.00187142	23.6954
Female infertility	Faecalibacterium	rs75499067	C	T	0.227585	0.0465522	1.76e-06	0.0838308	0.0283586	0.00311559	0.00525295	23.8899
Female infertility	Faecalibacterium	rs9536330	T	C	-0.048317	0.010797	5.33e-06	0.00907738	0.0152034	0.550465	0.00110628	20.0237
Female infertility	Faecalibacterium	rs114946999	C	T	-0.0861565	0.01896	5.7e-06	0.0104161	0.0229367	0.649739	0.00131575	20.6463
Female infertility	Faecalibacterium	rs11776390	T	C	-0.078354	0.017183	6.4e-06	0.00810645	0.0304203	0.789869	0.00124222	20.7907
Female infertility	Faecalibacterium	rs10927394	G	T	-0.232262	0.0512364	7.02e-06	-0.0794069	0.055785	0.154607	0.00584529	20.5376
Female infertility	Faecalibacterium	rs2835874	T	C	-0.0866356	0.0196496	7.54e-06	-0.0188531	0.0409722	0.645412	0.00110537	19.4374
Female infertility	Faecalibacterium	rs79656633	T	C	0.145631	0.0323019	8.14e-06	0.0539949	0.0253658	0.0332828	0.00223354	20.3215
Female infertility	Faecalibacterium	rs12753492	A	C	0.0641305	0.0149933	8.8e-06	0.0459697	0.0239772	0.055209	0.00104285	18.2929
Female infertility	Ruminococcustorquesgroup	rs35866622	T	C	-0.0612024	0.0109421	2.21e-08	0.0337041	0.0160006	0.0351674	0.00181138	31.2812
Female infertility	Ruminococcustorquesgroup	rs10904297	A	G	-0.167804	0.0389812	2.69e-06	0.0326233	0.0516027	0.527257	0.00586135	18.5191
Female infertility	Ruminococcustorquesgroup	rs12434631	A	G	0.074697	0.0153401	2.77e-06	-0.0113668	0.0246296	0.644433	0.00136454	23.7084
Female infertility	Ruminococcustorquesgroup	rs4073731	T	C	0.0651948	0.0142221	4.05e-06	-0.00888174	0.0204458	0.663995	0.0011796	21.0111
Female infertility	Ruminococcustorquesgroup	rs77034621	T	G	-0.151553	0.0335878	6.07e-06	0.0193067	0.0585942	0.741778	0.00237086	20.3547
Female infertility	Ruminococcustorquesgroup	rs1475330	T	C	0.0523492	0.01182	8.13e-06	-0.0423234	0.0178745	0.0178941	0.00112906	19.6125
Female infertility	Ruminococcustorquesgroup	rs10967781	C	A	0.0507994	0.0113322	8.37e-06	-0.0297804	0.0166718	0.074056	0.00112822	20.0927
Female infertility	Desulfovibrio	rs16863365	A	G	0.109402	0.0226964	1.79e-06	0.0223055	0.0358824	0.534187	0.00264056	23.2296
Female infertility	Desulfovibrio	rs2853179	C	T	0.0811971	0.0174234	2.42e-06	-0.0109549	0.0180648	0.544233	0.00242095	21.7128
Female infertility	Desulfovibrio	rs13066142	G	A	0.119141	0.0250891	3.79e-06	-0.0151531	0.0262378	0.563583	0.0024343	22.5453
Female infertility	Desulfovibrio	rs6580353	T	C	0.0770979	0.0169735	4.94e-06	-0.0247674	0.0189968	0.192312	0.00222768	20.6275
Female infertility	Desulfovibrio	rs4797774	G	A	0.212582	0.0470044	5.64e-06	-0.0486088	0.0382417	0.203695	0.00584988	20.4421
Female infertility	Desulfovibrio	rs12031543	T	C	-0.127185	0.0281887	6.55e-06	0.0372886	0.0222296	0.0934588	0.00229369	20.3527
Female infertility	Desulfovibrio	rs2590913	G	A	0.154496	0.0339396	6.65e-06	0.003253	0.0349545	0.925853	0.0028598	20.7156
Female infertility	Desulfovibrio	rs72647089	T	G	-0.106594	0.0239337	8.3e-06	0.0590805	0.0277319	0.0331375	0.0022028	19.8314
Female infertility	Desulfovibrio	rs2032031	A	G	-0.0654931	0.0148681	9.14e-06	0.00767422	0.0151232	0.611842	0.00209532	19.3993
Female infertility	Desulfovibrio	rs7729080	C	A	-0.070287	0.0157691	9.96e-06	-0.0114638	0.0166507	0.491146	0.00214528	19.8628
Female infertility	Coprococcus2	rs6677933	C	T	-0.0804405	0.0164216	1.19e-06	-0.018683	0.0213709	0.381996	0.00208524	23.9906
Female infertility	Coprococcus2	rs72680320	T	C	-0.0649382	0.013919	2.27e-06	0.000171937	0.0160476	0.991451	0.00197324	21.7623
Female infertility	Coprococcus2	rs2482516	C	T	0.0754415	0.0164619	4.72e-06	0.0306402	0.0182114	0.0924783	0.00182563	20.9984
Female infertility	Coprococcus2	rs9426473	A	G	0.0727361	0.0161662	6.31e-06	0.008464	0.0172301	0.623261	0.00175935	20.24
Female infertility	Coprococcus2	rs61823518	A	C	-0.0955381	0.0215724	6.68e-06	-0.0254134	0.0244727	0.299066	0.00178311	19.6099
Female infertility	Coprococcus2	rs10070053	A	G	0.0594312	0.0135375	7.65e-06	0.0302328	0.0153445	0.0488079	0.00167704	19.2697
Female infertility	Coprococcus2	rs35890118	A	G	-0.066536	0.0147661	8.26e-06	-0.00749932	0.0173979	0.666434	0.00176583	20.3005
Female infertility	Coprococcus2	rs12634070	T	C	0.0736486	0.0164921	9.95e-06	-0.00931905	0.0173353	0.59087	0.0017376	19.9388
Female infertility	Victivallis	rs56349194	A	G	-0.158501	0.0315231	6.26e-07	-0.0443726	0.0226287	0.0498907	0.00768144	25.2663
Female infertility	Victivallis	rs4764863	G	A	0.121561	0.0246058	8.22e-07	0.00057329	0.0152468	0.970006	0.00741755	24.3918
Female infertility	Victivallis	rs12512543	A	C	-0.178036	0.0374344	2.54e-06	-0.0344864	0.0272893	0.206325	0.0069349	22.605
Female infertility	Victivallis	rs4895919	T	C	-0.116918	0.0247515	2.75e-06	0.0065947	0.0151228	0.662782	0.00681034	22.2991
Female infertility	Victivallis	rs11899949	G	A	0.130568	0.0276239	2.77e-06	-0.0111647	0.0163646	0.495084	0.00681057	22.3273
Female infertility	Victivallis	rs173120	T	C	0.13381	0.0290127	7.65e-06	-0.012912	0.0193539	0.504674	0.00647679	21.2585
Female infertility	Victivallis	rs911666	T	C	-0.118576	0.0263146	7.65e-06	0.00439907	0.0164092	0.788633	0.00617673	20.2924
Female infertility	Victivallis	rs342302	A	G	-0.152754	0.0351572	8.16e-06	0.0156931	0.0220468	0.476583	0.0057487	18.8665
Female infertility	Victivallis	rs1882775	A	G	-0.13827	0.031273	8.73e-06	-0.0136482	0.019497	0.483918	0.00596445	19.5368
Female infertility	Victivallis	rs2546432	T	C	-0.110803	0.0249655	9.93e-06	-0.0141506	0.0152772	0.354315	0.0059951	19.686
Female infertility	Veillonella	rs1882878	A	G	-0.0768966	0.0163908	2.98e-06	-0.0129966	0.0165937	0.433495	0.0023656	22.0049
Female infertility	Veillonella	rs2013594	T	C	-0.0720698	0.0155153	3.42e-06	-0.0220637	0.0154903	0.154344	0.00231894	21.5721
Female infertility	Veillonella	rs62376424	C	T	-0.0762216	0.0163499	3.65e-06	-0.00180377	0.0165105	0.913004	0.00240926	21.7284
Female infertility	Veillonella	rs742016	A	G	-0.0688571	0.0149769	4.66e-06	0.00229629	0.0160082	0.885939	0.00227281	21.1329
Female infertility	Veillonella	rs6656807	A	G	0.0703062	0.0153954	5.5e-06	0.00933359	0.0157351	0.553069	0.0023121	20.8502
Female infertility	Veillonella	rs55807413	A	G	0.107329	0.0237633	5.51e-06	-0.0107721	0.0252784	0.670006	0.00236369	20.3949
Female infertility	Tyzzerella3	rs67476743	T	G	0.132164	0.022208	3.74e-09	-0.00256965	0.0170923	0.880497	0.00710688	35.4022
Female infertility	Tyzzerella3	rs55799124	A	G	-0.11435	0.0238604	1.34e-06	-0.0141919	0.0172751	0.41135	0.00426515	22.9591
Female infertility	Tyzzerella3	rs7561370	T	C	0.131341	0.0286292	1.52e-06	0.00938679	0.0212211	0.658247	0.00388525	21.0388
Female infertility	Tyzzerella3	rs75091807	G	T	-0.184966	0.0383029	1.71e-06	0.00441903	0.0314787	0.888359	0.0050211	23.3095
Female infertility	Tyzzerella3	rs7019909	T	C	0.144156	0.0301626	1.76e-06	0.0249108	0.0232667	0.284322	0.00421519	22.833
Female infertility	Tyzzerella3	rs4904512	T	C	-0.117151	0.0250306	3.09e-06	0.0230604	0.0224766	0.304903	0.00404314	21.8972
Female infertility	Tyzzerella3	rs6920448	C	T	-0.141081	0.0305446	4.15e-06	0.0140823	0.0261378	0.590045	0.00424017	21.3252
Female infertility	Tyzzerella3	rs7333521	T	C	-0.207191	0.0453121	4.88e-06	-0.0568001	0.0429316	0.185823	0.00479996	20.8985
Female infertility	Tyzzerella3	rs191093	G	A	0.159008	0.0353306	6.76e-06	-0.0247214	0.0246952	0.316798	0.00436417	20.2465
Female infertility	Tyzzerella3	rs1232220	G	T	-0.143869	0.031828	7.91e-06	-0.0137091	0.0256346	0.592797	0.00406982	20.4241
Female infertility	Tyzzerella3	rs10898797	C	T	0.12238	0.0274683	8.85e-06	-0.0335718	0.0242252	0.165801	0.00367127	19.8426
Female infertility	Turicibacter	rs11054680	T	C	-0.104751	0.0226998	2.31e-06	-0.0146016	0.0200369	0.466163	0.00237951	21.2901
Female infertility	Turicibacter	rs11666533	C	T	-0.111689	0.0248436	7.37e-06	-0.00390324	0.0275844	0.887474	0.00244208	20.2063
Female infertility	Turicibacter	rs149744580	A	G	0.169883	0.0315478	7.01e-08	-0.0220349	0.0337168	0.513414	0.00341628	28.9905
Female infertility	Turicibacter	rs2834977	T	C	-0.0959995	0.0208261	3.96e-06	-0.0239517	0.0209021	0.251836	0.00236953	21.2435
Female infertility	Turicibacter	rs2952020	G	A	-0.0759019	0.0165764	5.63e-06	-0.00682172	0.0176412	0.698984	0.00233741	20.9618
Female infertility	Turicibacter	rs3734633	G	A	-0.120957	0.02683	5.32e-06	-0.0246197	0.0323482	0.446609	0.00235064	20.3197
Female infertility	Turicibacter	rs4869133	G	A	0.131186	0.027197	2.55e-06	-0.0504975	0.0199475	0.0113569	0.00281024	23.2611
Female infertility	Turicibacter	rs55756211	T	C	-0.115115	0.0240708	2.81e-06	-0.0144684	0.029161	0.619785	0.00255147	22.8659
Female infertility	Turicibacter	rs7199484	G	A	-0.0731428	0.0160172	5.77e-06	-0.0163584	0.0163835	0.31805	0.00232507	20.8485
Female infertility	Terrisporobacter	rs1883097	C	T	0.226399	0.0454642	4.16e-07	0.0823212	0.0394695	0.0370067	0.00558278	24.7864
Female infertility	Terrisporobacter	rs2872237	C	A	-0.0814505	0.0175943	3.97e-06	-0.00859002	0.0154051	0.577112	0.00322105	21.4246
Female infertility	Terrisporobacter	rs58405430	G	T	0.134617	0.0301177	7.94e-06	-0.0247006	0.0319479	0.439432	0.00322438	19.9717
Female infertility	Terrisporobacter	rs7184125	T	C	0.091256	0.0205493	8.48e-06	-0.027674	0.016998	0.103508	0.00315448	19.7146
Female infertility	Terrisporobacter	rs2569953	A	C	-0.0775591	0.0174641	8.95e-06	0.0179795	0.0153214	0.240601	0.00296287	19.7171
Female infertility	Sutterella	rs2321387	G	A	-0.0592876	0.0124509	1.87e-06	-0.0263118	0.0152914	0.0853061	0.00170805	22.6704
Female infertility	Sutterella	rs7499539	A	G	0.0617478	0.0130998	2.36e-06	-0.0285605	0.0170952	0.0947851	0.00167354	22.215
Female infertility	Sutterella	rs13173038	A	G	-0.0718076	0.0151627	2.73e-06	0.0201307	0.0175055	0.250157	0.00169044	22.4245
Female infertility	Sutterella	rs143438747	T	C	-0.145793	0.0306867	3.28e-06	-0.021696	0.0286251	0.448488	0.00240369	22.5672
Female infertility	Sutterella	rs62501473	G	A	0.0694233	0.0149416	5.52e-06	-0.00491445	0.0172014	0.775108	0.00168873	21.5846
Female infertility	Sutterella	rs11591622	T	G	-0.0688382	0.0151375	6.5e-06	-0.000931385	0.0206206	0.963974	0.00163806	20.6767
Female infertility	Sutterella	rs607327	C	T	0.0578334	0.0129053	6.63e-06	-0.0193914	0.0156129	0.214232	0.00151327	20.0797
Female infertility	Sutterella	rs1145877	A	G	-0.073548	0.0162413	7.2e-06	-0.00756599	0.0220226	0.731181	0.00154518	20.5037
Female infertility	Sutterella	rs2613606	C	T	-0.0556794	0.0124117	7.2e-06	0.000259674	0.0153938	0.986541	0.00151663	20.1214
Female infertility	Sutterella	rs2050185	G	A	0.0575138	0.0128766	7.97e-06	0.0168902	0.0156673	0.28101	0.00150418	19.9469
Female infertility	Sutterella	rs9350083	T	G	-0.0593069	0.0133929	8.23e-06	-0.000242831	0.0157681	0.987713	0.0014773	19.6062
Female infertility	Sutterella	rs7638039	T	C	0.0645624	0.0143887	8.66e-06	0.00659639	0.0175437	0.706918	0.0015188	20.1304
Female infertility	Subdoligranulum	rs10065321	T	C	-0.0512828	0.0108105	2.1e-06	0.00713674	0.0153352	0.641657	0.00127777	22.5009
Female infertility	Subdoligranulum	rs4347804	A	G	0.166063	0.0357483	2.18e-06	0.0359702	0.0427207	0.399797	0.00497953	21.5692
Female infertility	Subdoligranulum	rs2114677	C	T	-0.104176	0.0230829	2.72e-06	0.00560077	0.0235738	0.812203	0.00130681	20.3658
Female infertility	Subdoligranulum	rs6555306	T	C	-0.0740777	0.0155463	2.81e-06	-0.043175	0.0215535	0.0451606	0.00128905	22.7024
Female infertility	Subdoligranulum	rs3761728	T	G	-0.0543458	0.0118866	3.87e-06	0.0162357	0.0173961	0.35067	0.0011883	20.901
Female infertility	Subdoligranulum	rs35940633	G	A	-0.0511008	0.011001	4.22e-06	0.00392181	0.0161241	0.80783	0.00122571	21.5745
Female infertility	Subdoligranulum	rs2171249	C	T	0.106744	0.0233213	4.51e-06	0.0791107	0.0288539	0.00611083	0.00142516	20.947
Female infertility	Subdoligranulum	rs76528319	G	T	-0.143279	0.0310662	7.41e-06	0.0344792	0.0272984	0.206573	0.00250562	21.2659
Female infertility	Subdoligranulum	rs75158211	T	C	-0.072343	0.015933	7.52e-06	-0.00367248	0.021246	0.862765	0.00119958	20.6132
Female infertility	Subdoligranulum	rs10497836	C	T	-0.0524065	0.0118697	8.38e-06	-0.0185716	0.0184784	0.314876	0.00110768	19.4912
Female infertility	Streptococcus	rs11110281	T	C	-0.137519	0.0227398	2.58e-09	-0.0191311	0.0354471	0.589398	0.00241296	36.5673
Female infertility	Streptococcus	rs11764382	A	G	-0.0695345	0.0143671	1.29e-06	-0.0272384	0.0217522	0.210493	0.00142738	23.4211
Female infertility	Streptococcus	rs1918540	G	A	0.059639	0.0128148	2.44e-06	0.0106472	0.0195897	0.586778	0.0013211	21.6563
Female infertility	Streptococcus	rs7916711	A	G	0.102891	0.0217362	2.72e-06	-0.0424184	0.0217343	0.0509753	0.00146295	22.4042
Female infertility	Streptococcus	rs17708276	A	G	-0.0793955	0.0170628	3.04e-06	0.00714585	0.0244225	0.769834	0.00132836	21.6491
Female infertility	Streptococcus	rs10448310	A	G	-0.0517935	0.0111324	3.31e-06	-0.00120631	0.0157643	0.939004	0.00131942	21.6433
Female infertility	Streptococcus	rs11720390	G	A	0.107024	0.0228121	3.59e-06	-0.0388894	0.0313495	0.214786	0.00144407	22.0076
Female infertility	Streptococcus	rs6806351	T	C	-0.0633829	0.0136647	4.94e-06	0.0256565	0.0183079	0.161098	0.00134515	21.5123
Female infertility	Streptococcus	rs57646748	G	A	-0.0907696	0.0200344	5.48e-06	0.00212689	0.0394908	0.957048	0.00128619	20.5245
Female infertility	Streptococcus	rs71481756	T	G	0.0931048	0.0207949	6.51e-06	0.0313204	0.0310622	0.313305	0.00137811	20.0433
Female infertility	Streptococcus	rs10028567	C	T	-0.0921167	0.0191881	7.3e-06	-0.0353815	0.0230702	0.125117	0.00141097	23.044
Female infertility	Streptococcus	rs2370083	G	T	-0.0816836	0.0185851	9.75e-06	-0.0136652	0.0310188	0.659543	0.00118536	19.3146
Female infertility	Slackia	rs8901	C	T	0.0934594	0.0186813	6.07e-07	-0.00264906	0.0165936	0.873162	0.00411107	25.0201
Female infertility	Slackia	rs4492265	A	G	-0.0905757	0.0191658	2.41e-06	-0.0221064	0.016586	0.182585	0.00367014	22.3267
Female infertility	Slackia	rs12440440	A	G	0.0901934	0.0190582	2.63e-06	-0.00463307	0.0159816	0.771893	0.00368039	22.3893
Female infertility	Slackia	rs16894137	C	T	-0.122792	0.0263047	2.71e-06	0.0264371	0.022359	0.237049	0.00358121	21.7837
Female infertility	Slackia	rs10409783	A	G	0.0950828	0.0211239	7.7e-06	9.96157e-05	0.0167761	0.995262	0.00339873	20.2539
Female infertility	Slackia	rs35156985	T	C	-0.155709	0.0348085	8.06e-06	0.00372955	0.0381434	0.922109	0.00334343	20.0037
Female infertility	Senegalimassilia	rs11787826	C	A	0.185519	0.0400881	8.05e-06	0.0022043	0.0153277	0.885649	0.00325077	22.572
Female infertility	Senegalimassilia	rs7225245	G	A	0.081327	0.0171154	2.63e-06	-0.00465708	0.015297	0.76079	0.00310786	21.5766
Female infertility	Senegalimassilia	rs10036909	C	T	-0.109619	0.0247785	8.91e-06	0.00661752	0.03807	0.862003	0.00426842	21.4079
Female infertility	Senegalimassilia	rs1990708	A	C	0.0782258	0.0176841	9.5e-06	-0.0175276	0.0283304	0.536124	0.00281906	19.5659
Female infertility	Senegalimassilia	rs2017373	C	T	0.079173	0.0170421	4.18e-06	-0.00103513	0.0158005	0.947766	0.00281848	19.5618
Female infertility	Sellimonas	rs2371572	A	C	0.127349	0.0250862	4.46e-07	0.0234785	0.01523	0.123172	0.00810446	25.754
Female infertility	Sellimonas	rs13417181	T	C	0.166509	0.0337521	7.62e-07	-0.0224382	0.018168	0.216816	0.00792405	24.3214
Female infertility	Sellimonas	rs2016057	A	C	-0.125878	0.0256153	1.03e-06	-0.00934002	0.0154676	0.545949	0.00759841	24.1336
Female infertility	Sellimonas	rs56203279	T	C	-0.124045	0.0269115	3.72e-06	0.0122646	0.0158979	0.440434	0.00669122	21.2328
Female infertility	Sellimonas	rs2187447	A	C	0.243457	0.0527695	3.98e-06	-0.0051499	0.0317133	0.870999	0.0069804	21.2712
Female infertility	Sellimonas	rs4600608	A	G	-0.137152	0.0301702	4.95e-06	0.00848445	0.0185358	0.647144	0.00663279	20.6522
Female infertility	Sellimonas	rs553697	T	C	-0.153767	0.0339099	6.13e-06	-0.0183018	0.0195224	0.348512	0.00670319	20.549
Female infertility	Sellimonas	rs113379006	T	C	-0.162759	0.0357025	7.21e-06	-0.0237081	0.0198517	0.232375	0.00654603	20.769
Female infertility	Sellimonas	rs41816	A	G	0.132201	0.0291087	8.39e-06	-0.027692	0.0165092	0.0934695	0.00649729	20.6134
Female infertility	Ruminococcus2	rs78120384	A	G	-0.192815	0.0392045	3.31e-07	-0.0312158	0.026134	0.232301	0.00396134	24.1807
Female infertility	Ruminococcus2	rs7635831	G	A	0.0618344	0.0129031	1.98e-06	0.0214474	0.0157533	0.17337	0.00153645	22.9622
Female infertility	Ruminococcus2	rs12986628	C	T	0.0665937	0.0140168	2.14e-06	0.00757067	0.0191605	0.692756	0.00153169	22.5688
Female infertility	Ruminococcus2	rs2368224	T	G	0.199648	0.0438453	3.63e-06	-0.0598628	0.035025	0.0874239	0.00680529	20.7202
Female infertility	Ruminococcus2	rs75140805	T	G	0.0836825	0.0176445	3.95e-06	0.0177791	0.0199042	0.371733	0.00157609	22.49
Female infertility	Ruminococcus2	rs58681734	A	G	0.0723875	0.0160787	4.18e-06	-0.00119085	0.0184752	0.948607	0.00131972	20.266
Female infertility	Ruminococcus2	rs2997412	A	G	-0.0568439	0.0122325	4.22e-06	0.0181792	0.0169547	0.283621	0.0014061	21.5915
Female infertility	Ruminococcus2	rs1819812	G	T	0.0842356	0.0184893	5.28e-06	0.0590397	0.0343905	0.0860261	0.00139409	20.7535
Female infertility	Ruminococcus2	rs4799823	C	T	0.0837001	0.0182263	5.4e-06	0.00649612	0.0195717	0.739954	0.00143746	21.0862
Female infertility	Ruminococcus2	rs4400279	A	G	0.0546114	0.0120077	5.8e-06	0.0194835	0.0161287	0.227048	0.0013472	20.6817
Female infertility	Ruminococcus2	rs61791565	T	C	-0.0523503	0.0117119	6.79e-06	0.0101373	0.0151687	0.503943	0.00130253	19.9769
Female infertility	Ruminococcus2	rs2846589	G	T	0.0522093	0.0116382	7.59e-06	0.02916	0.0154599	0.0592721	0.00134666	20.1219
Female infertility	Ruminococcus2	rs55707116	C	A	0.0865521	0.0189141	8.01e-06	0.00237838	0.0289028	0.934417	0.00136358	20.9377
Female infertility	Ruminococcus2	rs7693984	G	A	-0.102822	0.0235087	9.42e-06	-0.0331112	0.0368886	0.369398	0.00134974	19.1273
Female infertility	Ruminococcus2	rs12406309	A	C	-0.063193	0.0142275	9.79e-06	-0.00756143	0.0182267	0.678249	0.00128447	19.7252
Female infertility	Romboutsia	rs61841503	G	A	0.092888	0.0171454	4e-08	0.0273114	0.0224666	0.224121	0.00215859	29.3467
Female infertility	Romboutsia	rs10279978	A	G	-0.0622202	0.0127675	1.17e-06	-0.0096349	0.0162826	0.554031	0.0016764	23.7458
Female infertility	Romboutsia	rs62504452	A	G	-0.0710048	0.0156654	4.66e-06	-0.0268287	0.0218768	0.220066	0.00144693	20.5414
Female infertility	Romboutsia	rs75200530	T	G	-0.190644	0.0421065	5.07e-06	0.0014674	0.0451437	0.974069	0.00389249	20.492
Female infertility	Romboutsia	rs16843578	C	T	-0.0875276	0.0196779	5.08e-06	0.0213621	0.0338472	0.527954	0.00139274	19.7821
Female infertility	Romboutsia	rs9567264	C	T	0.0580018	0.0127495	5.76e-06	-0.00112157	0.0159976	0.944107	0.00145743	20.6937
Female infertility	Romboutsia	rs34302036	A	G	0.0550261	0.0120835	5.88e-06	-0.00572455	0.0153441	0.709089	0.00145979	20.7345
Female infertility	Romboutsia	rs11221428	T	C	-0.0726779	0.0158263	6.49e-06	-0.00796133	0.0179536	0.657449	0.00148426	21.0855
Female infertility	Romboutsia	rs75987356	G	A	-0.129578	0.0280454	6.71e-06	0.0115766	0.0283481	0.682999	0.00203552	21.3431
Female infertility	Romboutsia	rs7109293	A	G	0.0919112	0.0205738	6.98e-06	-0.029908	0.0235882	0.204827	0.00140933	19.9547
Female infertility	Romboutsia	rs77702691	A	G	-0.094406	0.0208544	7.37e-06	-0.000636007	0.0265817	0.980911	0.00163844	20.4895
Female infertility	Romboutsia	rs28603357	T	C	-0.214911	0.0474739	8.52e-06	-0.070835	0.0536559	0.186777	0.00551854	20.482
Female infertility	Romboutsia	rs9389266	T	G	0.0722815	0.0162353	9.38e-06	-0.0125392	0.0198777	0.528161	0.00139519	19.8185
Female infertility	Ruminococcus1	rs7117576	A	G	0.0829505	0.0170891	6.48e-07	-0.0563202	0.0262796	0.0321041	0.00141683	23.5584
Female infertility	Ruminococcus1	rs17781867	C	T	0.0999271	0.0211728	1.96e-06	0.04996	0.0297979	0.0936138	0.00154994	22.2715
Female infertility	Ruminococcus1	rs7583465	C	T	0.0527654	0.0112619	2.56e-06	-0.0147884	0.0151525	0.329079	0.00132162	21.9495
Female infertility	Ruminococcus1	rs6493760	C	T	0.0535262	0.0115885	3.38e-06	0.0158172	0.0158936	0.319641	0.00132124	21.3318
Female infertility	Ruminococcus1	rs11783695	G	T	-0.0734114	0.0161398	4.73e-06	-0.0233424	0.020757	0.260778	0.0012443	20.6861
Female infertility	Ruminococcus1	rs6105066	T	C	-0.0607052	0.013425	5.06e-06	0.011577	0.0169675	0.495047	0.0012724	20.4442
Female infertility	Ruminococcus1	rs78613526	G	A	0.167497	0.0367639	5.11e-06	-0.0441356	0.034474	0.200454	0.00284862	20.7515
Female infertility	Ruminococcus1	rs78572139	G	A	0.125038	0.0279411	5.23e-06	0.027098	0.0251632	0.28153	0.00171352	20.0226
Female infertility	Ruminococcus1	rs10167839	A	G	0.0519509	0.0116306	8.09e-06	-0.0100869	0.0157767	0.522591	0.0012001	19.9492
Female infertility	Ruminococcus1	rs3819978	C	T	-0.11504	0.0260137	8.74e-06	-0.0195178	0.0282861	0.490186	0.00152922	19.5535
Female infertility	RuminococcaceaeUCG009	rs1550196	G	A	0.130842	0.0262478	1.13e-06	0.0310229	0.0251731	0.217805	0.00335168	24.8421
Female infertility	RuminococcaceaeUCG009	rs4708333	T	G	-0.084033	0.0174757	1.56e-06	-0.0264505	0.0159466	0.0971785	0.003069	23.1161
Female infertility	RuminococcaceaeUCG009	rs2058609	A	G	0.0816464	0.017472	3.12e-06	-0.0255844	0.0169077	0.130235	0.00289928	21.8311
Female infertility	RuminococcaceaeUCG009	rs4079028	C	T	0.0915623	0.019936	3.28e-06	-0.00590796	0.0176447	0.737753	0.0028121	21.0882
Female infertility	RuminococcaceaeUCG009	rs12508214	C	T	-0.0774649	0.0168937	4.75e-06	0.00451357	0.0161836	0.780324	0.00279157	21.0206
Female infertility	RuminococcaceaeUCG009	rs2192926	A	G	-0.089048	0.0192989	4.88e-06	-0.00748573	0.0160397	0.640714	0.00282655	21.2847
Female infertility	RuminococcaceaeUCG009	rs9558661	T	C	-0.0897823	0.0200739	7.01e-06	0.0160684	0.018879	0.394699	0.00266721	19.9988
Female infertility	RuminococcaceaeUCG009	rs113006825	T	C	-0.0928893	0.0208035	7.98e-06	-0.0015351	0.0185731	0.934128	0.00277483	19.9314
Female infertility	RuminococcaceaeUCG009	rs6952765	G	A	0.0732099	0.0166777	8.13e-06	0.0189118	0.0162717	0.245136	0.00255892	19.2643
Female infertility	RuminococcaceaeUCG009	rs758191	T	G	0.17702	0.0375113	9.01e-06	-0.0489747	0.0255385	0.0551506	0.00380599	22.2622
Female infertility	RuminococcaceaeUCG009	rs78410648	A	G	0.120989	0.0277317	9.67e-06	0.015303	0.0242149	0.527407	0.00252813	19.0293
Female infertility	RuminococcaceaeUCG009	rs138460696	A	G	0.139274	0.0315794	9.81e-06	-0.0103706	0.0287107	0.717941	0.0028253	19.4449
Female infertility	RuminococcaceaeUCG014	rs115777838	T	C	-0.18835	0.0386643	4.62e-07	0.00950319	0.0239917	0.692029	0.00416492	23.7222
Female infertility	RuminococcaceaeUCG014	rs12638134	T	G	0.0582548	0.0119657	1.21e-06	0.0340918	0.0152816	0.0256874	0.00164293	23.6987
Female infertility	RuminococcaceaeUCG014	rs995642	C	T	0.060048	0.0126417	1.9e-06	-0.00959811	0.0177849	0.589419	0.00156417	22.5593
Female infertility	RuminococcaceaeUCG014	rs72809222	T	C	0.0671775	0.0139838	2.41e-06	-0.0161557	0.0184962	0.382412	0.00165492	23.0747
Female infertility	RuminococcaceaeUCG014	rs56105232	G	A	0.139276	0.0299132	2.91e-06	-0.0684591	0.031566	0.0301009	0.00235335	21.6736
Female infertility	RuminococcaceaeUCG014	rs73186226	G	A	-0.0993852	0.0216819	6.72e-06	0.00217543	0.0290134	0.940231	0.00152465	21.0081
Female infertility	RuminococcaceaeUCG014	rs853612	A	G	-0.0528257	0.0119367	9.75e-06	0.0195158	0.0154117	0.205407	0.00135794	19.5823
Female infertility	RuminococcaceaeUCG014	rs10791168	A	G	-0.0664624	0.0150069	9.76e-06	0.0024411	0.0196893	0.90133	0.00135996	19.6115
Female infertility	RuminococcaceaeUCG014	rs34402072	C	T	-0.0688023	0.0156083	9.8e-06	0.0194087	0.021627	0.36949	0.00139968	19.4282
Female infertility	RuminococcaceaeUCG014	rs10495392	C	T	-0.082486	0.0187194	9.96e-06	-0.00883016	0.0293509	0.763532	0.00139473	19.4139
Female infertility	RuminococcaceaeUCG013	rs12781711	C	T	-0.0656129	0.0117477	2.55e-08	-0.0233496	0.0174667	0.181285	0.00185645	31.1906
Female infertility	RuminococcaceaeUCG013	rs12189346	G	A	0.0684961	0.014558	1.68e-06	-0.0118968	0.0193766	0.539231	0.0013423	22.1347
Female infertility	RuminococcaceaeUCG013	rs75088940	T	C	-0.0942968	0.0200712	2.55e-06	0.00949823	0.0297523	0.749542	0.00140946	22.0694
Female infertility	RuminococcaceaeUCG013	rs76973485	G	T	0.194976	0.0418213	3.35e-06	0.0114779	0.0384781	0.765477	0.00408501	21.7271
Female infertility	RuminococcaceaeUCG013	rs16918863	A	C	0.111491	0.0240157	4.16e-06	-0.016419	0.0310228	0.596627	0.00170177	21.5488
Female infertility	RuminococcaceaeUCG013	rs12485353	G	A	-0.0607903	0.0130847	4.19e-06	-0.00659152	0.0174851	0.706189	0.00128536	21.5819
Female infertility	RuminococcaceaeUCG013	rs11581881	C	T	0.0661211	0.0144736	4.73e-06	0.000473329	0.017984	0.979002	0.00132501	20.8674
Female infertility	RuminococcaceaeUCG013	rs4385846	G	T	0.0598405	0.0131807	6.46e-06	0.0382818	0.0191251	0.0453221	0.00122743	20.6092
Female infertility	RuminococcaceaeUCG013	rs2730183	G	A	-0.0488692	0.0109907	8.44e-06	0.00104406	0.0154564	0.946145	0.00117739	19.7681
Female infertility	RuminococcaceaeUCG013	rs12336782	T	C	-0.0856047	0.0189311	8.6e-06	0.00811942	0.028023	0.772014	0.00121767	20.4452
Female infertility	RuminococcaceaeUCG013	rs9313055	T	C	0.105087	0.023446	9.55e-06	-0.0265762	0.0274841	0.333559	0.00127275	20.0866
Female infertility	RuminococcaceaeUCG011	rs1416041	A	C	-0.182339	0.0339898	7.04e-08	-0.011187	0.0186815	0.549285	0.00786121	28.7623
Female infertility	RuminococcaceaeUCG011	rs12724320	C	T	-0.120881	0.0249229	1.52e-06	-0.0188526	0.0155169	0.224377	0.00643526	23.5113
Female infertility	RuminococcaceaeUCG011	rs79113084	C	T	-0.152166	0.0317519	2.06e-06	0.0180911	0.0248666	0.466904	0.00632166	22.9536
Female infertility	RuminococcaceaeUCG011	rs9729514	A	G	0.184934	0.0394616	2.37e-06	-0.00132411	0.0260307	0.959432	0.00601059	21.9504
Female infertility	RuminococcaceaeUCG011	rs12636310	G	A	0.132725	0.0282037	2.81e-06	0.0258309	0.0174456	0.1387	0.00606054	22.1339
Female infertility	RuminococcaceaeUCG011	rs2729556	C	T	-0.109097	0.0233699	3.19e-06	0.022104	0.0152064	0.146057	0.00596442	21.7808
Female infertility	RuminococcaceaeUCG011	rs10274562	C	T	0.110917	0.0244556	6.5e-06	0.0241283	0.0155267	0.120187	0.00563177	20.5591
Female infertility	RuminococcaceaeUCG011	rs4490371	T	C	-0.111816	0.0248963	7.75e-06	-0.00899547	0.0154643	0.560773	0.00555667	20.1605
Female infertility	RuminococcaceaeUCG010	rs682403	A	G	-0.0588161	0.0124671	2.37e-06	0.0183321	0.0151563	0.226457	0.00172716	22.2531
Female infertility	RuminococcaceaeUCG010	rs6958419	C	T	-0.0585718	0.0124994	2.84e-06	0.0411284	0.0150773	0.006375	0.00170326	21.955
Female infertility	RuminococcaceaeUCG010	rs2820282	A	C	-0.0592304	0.0125917	2.85e-06	-0.00177307	0.0155162	0.909022	0.00171698	22.1235
Female infertility	RuminococcaceaeUCG010	rs12597105	G	A	0.0670855	0.0144415	4.87e-06	0.0204085	0.0193187	0.29078	0.00173513	21.5756
Female infertility	RuminococcaceaeUCG010	rs73218807	G	A	-0.166211	0.0367938	6.43e-06	0.024856	0.027632	0.368366	0.00303018	20.4004
Female infertility	RuminococcaceaeUCG010	rs7441445	C	T	-0.05695	0.0126502	6.8e-06	-0.0187502	0.0151554	0.216014	0.00157447	20.2639
Female infertility	RuminococcaceaeUCG005	rs10950694	T	C	0.0577628	0.011412	4.3e-07	-0.0141719	0.0157666	0.36873	0.00161672	25.6164
Female infertility	RuminococcaceaeUCG005	rs34781347	G	A	0.188685	0.0386484	6.05e-07	-0.0137845	0.0290571	0.63522	0.00391708	23.8269
Female infertility	RuminococcaceaeUCG005	rs12458218	T	C	0.0677322	0.0144525	2.41e-06	0.002463	0.0196042	0.90002	0.00136243	21.9609
Female infertility	RuminococcaceaeUCG005	rs7555878	A	G	0.0586677	0.0125277	2.81e-06	-0.0339185	0.0174502	0.0519278	0.00136031	21.928
Female infertility	RuminococcaceaeUCG005	rs12288512	A	G	0.066635	0.0144356	3.1e-06	-0.0220131	0.0176999	0.213616	0.0013752	21.305
Female infertility	RuminococcaceaeUCG005	rs114279581	A	G	-0.146604	0.0316034	3.22e-06	0.0215978	0.0285798	0.449827	0.00253568	21.514
Female infertility	RuminococcaceaeUCG005	rs2893871	G	A	-0.073644	0.015548	3.54e-06	-0.0345371	0.024272	0.154759	0.00139128	22.4322
Female infertility	RuminococcaceaeUCG005	rs10873449	T	C	0.0654843	0.0143973	4.11e-06	0.0157941	0.0191509	0.40953	0.00128345	20.685
Female infertility	RuminococcaceaeUCG005	rs7449320	C	A	0.0599163	0.0130836	4.81e-06	0.00476685	0.017921	0.790245	0.0013013	20.9691
Female infertility	RuminococcaceaeUCG005	rs72776570	C	A	0.087067	0.0197179	5.36e-06	-0.0108733	0.02559	0.670907	0.00126646	19.4953
Female infertility	RuminococcaceaeUCG005	rs55793120	T	C	0.121548	0.0279546	7.37e-06	-0.00543154	0.0316695	0.863825	0.00168154	18.9021
Female infertility	RuminococcaceaeUCG005	rs898577	T	C	-0.123012	0.0286671	7.46e-06	-0.0381309	0.0325313	0.241145	0.00183959	18.4095
Female infertility	RuminococcaceaeUCG005	rs10937802	G	A	0.0755811	0.0168226	8.17e-06	-0.0264934	0.0233609	0.256757	0.00127424	20.1829
Female infertility	RuminococcaceaeUCG005	rs7586445	G	A	0.0782349	0.0176458	8.81e-06	0.0120562	0.0224436	0.591144	0.00130019	19.6545
Female infertility	RuminococcaceaeUCG004	rs6769553	A	G	0.0849743	0.0157451	7.91e-08	-0.000956418	0.0171701	0.955579	0.00305624	29.1202
Female infertility	RuminococcaceaeUCG004	rs12125734	G	T	0.133972	0.0257417	2.09e-07	0.0142868	0.0259369	0.581751	0.00302133	27.0804
Female infertility	RuminococcaceaeUCG004	rs511258	G	A	-0.0757474	0.0162475	4.52e-06	-0.00473021	0.0194043	0.807408	0.00228269	21.7306
Female infertility	RuminococcaceaeUCG004	rs9818949	G	T	0.0859927	0.0188671	5.39e-06	-0.00879527	0.0190916	0.645023	0.00227362	20.769
Female infertility	RuminococcaceaeUCG004	rs872501	G	A	0.116125	0.025946	5.81e-06	0.0191975	0.0291343	0.509939	0.00235855	20.0265
Female infertility	RuminococcaceaeUCG004	rs10976229	T	G	0.095976	0.0214554	7.04e-06	0.0216526	0.0224798	0.335446	0.00219026	20.0059
Female infertility	RuminococcaceaeUCG004	rs7569771	A	G	-0.075914	0.0170308	8.12e-06	0.0344158	0.0175177	0.0494573	0.00208666	19.8647
Female infertility	RuminococcaceaeUCG004	rs2248146	T	C	0.0689452	0.0153649	8.2e-06	0.00954514	0.0159269	0.548968	0.00211452	20.1306
Female infertility	RuminococcaceaeUCG004	rs11961899	G	A	-0.0707825	0.0161381	9.18e-06	0.0135566	0.0168304	0.420542	0.00202068	19.2333
Female infertility	RuminococcaceaeUCG004	rs550351	A	C	0.078587	0.018003	9.43e-06	0.00780778	0.0152587	0.608866	0.0020022	19.051
Female infertility	RuminococcaceaeUCG003	rs73341549	T	C	-0.169857	0.0318768	1.51e-07	-0.00435604	0.0323977	0.893043	0.00419253	28.3851
Female infertility	RuminococcaceaeUCG003	rs646327	G	A	0.0586696	0.011837	7.83e-07	0.0370977	0.0153713	0.015803	0.00170241	24.5633
Female infertility	RuminococcaceaeUCG003	rs6759615	A	G	0.102523	0.0200204	7.86e-07	0.0186941	0.0253648	0.461118	0.00181653	26.2202
Female infertility	RuminococcaceaeUCG003	rs11613919	G	T	0.0727604	0.0155716	1.63e-06	-0.0132233	0.0182097	0.467734	0.00152353	21.8304
Female infertility	RuminococcaceaeUCG003	rs11243416	T	C	-0.0925653	0.0191203	1.67e-06	0.0279671	0.0300848	0.352574	0.00167081	23.4339
Female infertility	RuminococcaceaeUCG003	rs16959793	A	C	-0.062527	0.0131259	2.22e-06	-0.00119378	0.0153315	0.937936	0.00157207	22.6892
Female infertility	RuminococcaceaeUCG003	rs4452755	A	C	-0.0634463	0.0134741	3.29e-06	0.00621661	0.0159601	0.696899	0.00153675	22.1694
Female infertility	RuminococcaceaeUCG003	rs10490280	C	T	-0.0672094	0.0143309	4.16e-06	0.0151129	0.0192969	0.433524	0.00156811	21.9912
Female infertility	RuminococcaceaeUCG003	rs3013089	G	A	-0.0551473	0.0120346	4.38e-06	-0.0199161	0.0155445	0.200114	0.00145529	20.9955
Female infertility	RuminococcaceaeUCG003	rs4532474	G	A	0.0769231	0.017045	4.82e-06	0.0286742	0.0205	0.16189	0.00141119	20.3639
Female infertility	RuminococcaceaeUCG003	rs2523124	T	C	-0.0546625	0.0120823	5.78e-06	-0.00157071	0.0154417	0.91898	0.00141849	20.4652
Female infertility	RuminococcaceaeUCG003	rs78720113	A	G	-0.115348	0.0249601	7.59e-06	-0.0566966	0.0282678	0.044889	0.00163035	21.3533
Female infertility	RuminococcaceaeUCG002	rs77564310	A	C	-0.0713093	0.0140855	3.29e-07	-0.00995907	0.0187073	0.594476	0.00150537	25.6268
Female infertility	RuminococcaceaeUCG002	rs55793120	T	C	0.137396	0.027414	4.81e-07	-0.00543154	0.0316695	0.863825	0.00214802	25.1148
Female infertility	RuminococcaceaeUCG002	rs10927423	C	A	-0.0713617	0.0147712	8.5e-07	0.00792546	0.0197515	0.688231	0.00136336	23.3371
Female infertility	RuminococcaceaeUCG002	rs7155595	C	A	0.0569929	0.0116986	1.15e-06	0.0279446	0.0165041	0.0904191	0.00138733	23.7312
Female infertility	RuminococcaceaeUCG002	rs11750293	G	T	-0.0578304	0.0120512	1.76e-06	0.00525579	0.0156742	0.737388	0.00134531	23.0249
Female infertility	RuminococcaceaeUCG002	rs7120052	A	C	0.0624796	0.0135523	1.97e-06	-0.0287584	0.0193133	0.136475	0.00124162	21.252
Female infertility	RuminococcaceaeUCG002	rs116974815	C	A	-0.189731	0.0396566	2.03e-06	0.0120299	0.0299625	0.688055	0.00391823	22.882
Female infertility	RuminococcaceaeUCG002	rs10916131	C	T	-0.069333	0.0146753	2.87e-06	0.0456905	0.0204915	0.025765	0.00130382	22.3179
Female infertility	RuminococcaceaeUCG002	rs12463378	A	G	-0.0522061	0.0112086	2.96e-06	-0.000505838	0.0164589	0.975482	0.00127493	21.6912
Female infertility	RuminococcaceaeUCG002	rs76847269	A	G	0.163508	0.0356151	5.17e-06	0.0254571	0.0478224	0.5945	0.00274617	21.0716
Female infertility	RuminococcaceaeUCG002	rs882348	A	G	-0.0799946	0.0178618	5.45e-06	0.00297538	0.0235418	0.899425	0.00117177	20.0549
Female infertility	RuminococcaceaeUCG002	rs11607472	A	G	-0.0780229	0.0176325	7.19e-06	-0.00308936	0.0301087	0.918275	0.00120112	19.5778
Female infertility	RuminococcaceaeUCG002	rs57079348	T	G	-0.076573	0.017282	7.22e-06	0.00787072	0.0326482	0.809496	0.00119769	19.6296
Female infertility	RuminococcaceaeUCG002	rs10964441	G	A	-0.14906	0.034486	7.45e-06	0.0166784	0.0247276	0.500003	0.00348252	18.6756
Female infertility	RuminococcaceaeUCG002	rs113147300	A	G	-0.075842	0.0164562	7.69e-06	0.00294466	0.0220737	0.893876	0.00129583	21.2377
Female infertility	RuminococcaceaeUCG002	rs6542556	A	G	0.050974	0.011406	7.86e-06	-0.0310395	0.015536	0.0457257	0.00116702	19.97
Female infertility	RuminococcaceaeUCG002	rs7249614	A	G	-0.0492778	0.0110807	9.07e-06	-0.00205946	0.0156344	0.895201	0.00118635	19.7751
Female infertility	RuminococcaceaeUCG002	rs15256	C	T	0.0732376	0.016834	9.46e-06	0.0207657	0.0234972	0.37683	0.00110597	18.9253
Female infertility	RuminococcaceaeUCG002	rs6793778	C	T	-0.0558706	0.0125258	9.81e-06	0.0123161	0.0172618	0.475545	0.00116254	19.8932
Female infertility	RuminococcaceaeNK4A214group	rs5994253	A	G	-0.0811302	0.0157621	2.35e-07	-0.015189	0.0217371	0.484701	0.00172996	26.4899
Female infertility	RuminococcaceaeNK4A214group	rs11586410	G	A	-0.0863422	0.0169937	3.66e-07	-0.0131866	0.0210165	0.53037	0.00173864	25.8114
Female infertility	RuminococcaceaeNK4A214group	rs136761	G	A	-0.0587521	0.0119155	8.15e-07	-0.00847387	0.0157325	0.590147	0.00163759	24.3089
Female infertility	RuminococcaceaeNK4A214group	rs7573569	T	C	0.107739	0.0233638	3.23e-06	0.00504772	0.031758	0.873713	0.0014326	21.2616
Female infertility	RuminococcaceaeNK4A214group	rs12642039	T	C	-0.0553003	0.0119397	3.43e-06	0.000251093	0.0157236	0.987259	0.00140232	21.449
Female infertility	RuminococcaceaeNK4A214group	rs4814689	C	T	-0.1083	0.0230708	4.55e-06	0.0305169	0.0364657	0.402668	0.00157052	22.0329
Female infertility	RuminococcaceaeNK4A214group	rs147475196	A	G	-0.133769	0.0295196	4.72e-06	0.0688534	0.0242117	0.00445779	0.00206637	20.5305
Female infertility	RuminococcaceaeNK4A214group	rs12731	A	G	-0.0527684	0.0115053	4.87e-06	0.0115405	0.0155894	0.45913	0.00137405	21.0326
Female infertility	RuminococcaceaeNK4A214group	rs35559912	T	C	-0.0925071	0.0203674	4.89e-06	0.0287109	0.0232368	0.216615	0.00147386	20.6261
Female infertility	RuminococcaceaeNK4A214group	rs62027366	T	C	0.0615389	0.0137612	6.58e-06	-0.0288871	0.0188894	0.126196	0.0013474	19.9954
Female infertility	RuminococcaceaeNK4A214group	rs11241747	C	T	0.0533858	0.0120035	6.59e-06	-0.00487474	0.0166834	0.770141	0.00133276	19.7779
Female infertility	RuminococcaceaeNK4A214group	rs13087692	T	G	0.0574623	0.012594	8.69e-06	-0.00386925	0.0165517	0.815166	0.00135988	20.8154
Female infertility	RuminococcaceaeNK4A214group	rs6681678	C	T	-0.100174	0.024	9.05e-06	0.0105888	0.0420203	0.801047	0.00133515	17.4189
Female infertility	Ruminiclostridium9	rs918449	A	G	-0.0950908	0.0197177	2.56e-06	-0.0163701	0.0292281	0.575425	0.00138866	23.2548
Female infertility	Ruminiclostridium9	rs9522712	T	C	0.0699728	0.0154939	4.66e-06	0.0210131	0.0212443	0.322606	0.00121798	20.3932
Female infertility	Ruminiclostridium9	rs6082461	A	C	0.0586425	0.0131004	4.87e-06	-0.0114114	0.0187396	0.542559	0.00120204	20.0357
Female infertility	Ruminiclostridium9	rs7137760	C	T	0.050797	0.0112182	7.07e-06	-0.0162871	0.0151903	0.283627	0.00122464	20.501
Female infertility	Ruminiclostridium9	rs78191726	T	C	0.0944998	0.0210206	7.58e-06	0.000294491	0.0292099	0.991956	0.00125848	20.2077
Female infertility	Ruminiclostridium9	rs74303178	T	C	0.0532742	0.0119274	7.92e-06	-0.00240417	0.0162827	0.882618	0.00119276	19.9477
Female infertility	Ruminiclostridium9	rs9809789	C	T	-0.0717454	0.0159673	8.72e-06	0.029164	0.0195643	0.136047	0.00125828	20.1869
Female infertility	Ruminiclostridium6	rs71414120	T	G	0.200894	0.0406434	1.08e-06	0.0525753	0.034356	0.12594	0.0043695	24.423
Female infertility	Ruminiclostridium6	rs61060922	T	G	0.15913	0.0322283	1.09e-06	0.0319743	0.0420552	0.447079	0.00271506	24.3741
Female infertility	Ruminiclostridium6	rs77193512	A	G	0.0736533	0.0153163	1.3e-06	-0.0177279	0.0175172	0.311526	0.00172531	23.1211
Female infertility	Ruminiclostridium6	rs79968172	G	A	0.11614	0.0243083	1.66e-06	-0.0513842	0.0321498	0.109982	0.00177991	22.8235
Female infertility	Ruminiclostridium6	rs663262	T	C	-0.13498	0.0310715	3.39e-06	0.0163268	0.0419304	0.696996	0.00239041	18.8672
Female infertility	Ruminiclostridium6	rs11992182	A	C	0.0625299	0.0137876	4.65e-06	0.008483	0.0181845	0.640861	0.00153478	20.5653
Female infertility	Ruminiclostridium6	rs72991535	T	G	0.135604	0.0295174	4.95e-06	0.021969	0.0410841	0.592835	0.00218409	21.1007
Female infertility	Ruminiclostridium6	rs2548459	C	T	0.0554866	0.0122755	6.4e-06	0.0366056	0.015367	0.0172147	0.00152503	20.4285
Female infertility	Ruminiclostridium6	rs9555756	A	C	-0.0804138	0.0176692	7.1e-06	0.000514098	0.0271457	0.98489	0.00154688	20.7092
Female infertility	Ruminiclostridium6	rs73176030	T	C	0.058665	0.013208	7.29e-06	0.0398555	0.0170169	0.0191752	0.0014725	19.7252
Female infertility	Ruminiclostridium6	rs792058	G	A	0.0554234	0.0125423	8.58e-06	-0.0140788	0.0153536	0.359156	0.00150757	19.5238
Female infertility	Ruminiclostridium6	rs35362464	C	A	0.0720077	0.0165387	8.99e-06	-0.00144093	0.0217907	0.947277	0.00142241	18.9536
Female infertility	Ruminiclostridium6	rs116969552	A	G	-0.166823	0.0376681	9.16e-06	0.094914	0.0457318	0.0379446	0.00286601	19.6081
Female infertility	Ruminiclostridium6	rs67479537	T	C	0.118994	0.026487	9.3e-06	-0.0772085	0.0354827	0.029559	0.00173495	20.1795
Female infertility	Ruminiclostridium5	rs79968837	A	G	-0.0950311	0.0193507	1.15e-06	-0.00858855	0.0343797	0.802731	0.00145059	24.1148
Female infertility	Ruminiclostridium5	rs2482038	C	A	0.0518991	0.0108777	1.7e-06	0.0264216	0.0153627	0.0854594	0.00130686	22.7613
Female infertility	Ruminiclostridium5	rs10827477	A	G	-0.0547387	0.0115163	2.19e-06	-0.00182655	0.0157925	0.907923	0.00129739	22.5896
Female infertility	Ruminiclostridium5	rs6121460	G	A	0.0932955	0.0199206	2.64e-06	-0.0279133	0.0279085	0.317228	0.00126494	21.9314
Female infertility	Ruminiclostridium5	rs1492620	T	C	-0.0830505	0.0180073	3.53e-06	-0.0237469	0.0225782	0.292909	0.00122119	21.2685
Female infertility	Ruminiclostridium5	rs113753996	T	C	0.0820689	0.0174463	3.99e-06	-0.0246522	0.0195522	0.207366	0.00132489	22.1259
Female infertility	Ruminiclostridium5	rs2791343	T	C	0.051717	0.0113369	5.54e-06	-0.00188245	0.0154101	0.902775	0.00119512	20.808
Female infertility	Ruminiclostridium5	rs8053158	A	G	-0.0740543	0.0159151	5.9e-06	0.00861116	0.0231204	0.70956	0.00124299	21.6487
Female infertility	Ruminiclostridium5	rs2833828	G	A	0.0489617	0.0108702	6.82e-06	0.0201475	0.015377	0.190115	0.00116481	20.2856
Female infertility	Ruminiclostridium5	rs1223978	T	C	0.0484169	0.0108254	8.16e-06	0.0130078	0.015205	0.392276	0.00114956	20.0011
Female infertility	Ruminiclostridium5	rs4955951	A	G	-0.0713749	0.0165826	9.96e-06	-0.0339708	0.0234881	0.148094	0.00106377	18.524
Female infertility	Roseburia	rs2160994	T	C	0.0550687	0.0112481	9.7e-07	0.0245361	0.0160033	0.125228	0.00137217	23.9663
Female infertility	Roseburia	rs16910295	T	C	-0.0980434	0.020957	2.91e-06	0.0610467	0.0336379	0.0695521	0.00131295	21.884
Female infertility	Roseburia	rs6445851	G	A	-0.0497336	0.0108158	3.53e-06	-0.0157919	0.0156154	0.311871	0.00118305	21.1413
Female infertility	Roseburia	rs2943022	T	C	0.0493786	0.0106763	4.11e-06	0.00654426	0.0153404	0.669669	0.00119668	21.3887
Female infertility	Roseburia	rs9300744	C	T	-0.0588452	0.0126228	4.75e-06	-0.0155792	0.0196696	0.428336	0.00121576	21.7301
Female infertility	Roseburia	rs12740451	T	C	0.0697527	0.0153607	7.34e-06	0.0181264	0.0221736	0.413655	0.00115471	20.6181
Female infertility	Roseburia	rs75326254	C	T	-0.104628	0.0230897	7.5e-06	0.000476931	0.0321106	0.98815	0.0012903	20.5307
Female infertility	Roseburia	rs302266	T	C	-0.0777312	0.0172985	8.13e-06	-0.0550808	0.0227374	0.0154152	0.00118245	20.1893
Female infertility	Roseburia	rs57466170	C	T	0.0741405	0.0171601	8.3e-06	-0.00710192	0.0286905	0.804494	0.0010758	18.6647
Female infertility	Roseburia	rs147990086	A	G	-0.0578936	0.01324	8.93e-06	0.0257765	0.0198897	0.194984	0.0010706	19.1178
Female infertility	Roseburia	rs78753150	A	C	0.0968739	0.0214067	9.98e-06	-0.0314356	0.0252242	0.212673	0.00125459	20.4768
Female infertility	Roseburia	rs55858165	A	C	0.179284	0.0404954	9.99e-06	0.00419923	0.039834	0.916044	0.00358555	19.5936
Female infertility	RikenellaceaeRC9gutgroup	rs2900503	G	T	-0.172329	0.0326671	1.55e-07	0.0223377	0.0204713	0.275197	0.00831251	27.8121
Female infertility	RikenellaceaeRC9gutgroup	rs17582787	A	G	-0.157739	0.0339924	3.55e-06	0.0592916	0.0201101	0.00319485	0.00644421	21.5206
Female infertility	RikenellaceaeRC9gutgroup	rs2998141	T	C	-0.136346	0.0293073	4.42e-06	0.0106114	0.0178856	0.552986	0.00645772	21.631
Female infertility	RikenellaceaeRC9gutgroup	rs80309088	G	A	0.17405	0.0383423	4.56e-06	-0.0184471	0.0232791	0.42811	0.0064583	20.5929
Female infertility	RikenellaceaeRC9gutgroup	rs4717843	G	T	-0.119376	0.0260548	4.72e-06	0.00148917	0.0151642	0.921771	0.00647709	20.9792
Female infertility	RikenellaceaeRC9gutgroup	rs9887954	G	A	-0.114849	0.0249013	4.81e-06	-0.0247151	0.0153854	0.108186	0.00634752	21.2595
Female infertility	RikenellaceaeRC9gutgroup	rs4270579	G	A	-0.118021	0.0271041	5.46e-06	0.00269765	0.0162	0.867746	0.00565992	18.9491
Female infertility	RikenellaceaeRC9gutgroup	rs12501673	A	G	0.116395	0.0262253	6.29e-06	-0.0252287	0.0171393	0.141026	0.00587361	19.6865
Female infertility	RikenellaceaeRC9gutgroup	rs17032291	T	C	-0.169579	0.0368251	6.61e-06	-0.0289478	0.022905	0.206294	0.00657093	21.1925
Female infertility	RikenellaceaeRC9gutgroup	rs7712231	A	G	0.156284	0.0350462	7.97e-06	0.0101187	0.0223363	0.650538	0.00592923	19.874
Female infertility	RikenellaceaeRC9gutgroup	rs2074881	T	C	-0.142236	0.032391	9.45e-06	0.0136961	0.022447	0.54176	0.0057832	19.2712
Female infertility	Prevotella9	rs111509883	T	C	0.171131	0.0347624	1.24e-06	-0.0397769	0.0243971	0.103018	0.0034699	24.2276
Female infertility	Prevotella9	rs2683313	A	G	-0.0724576	0.0151603	1.69e-06	-0.0184326	0.0162918	0.257886	0.00222147	22.8386
Female infertility	Prevotella9	rs11685699	C	T	-0.141357	0.0295665	2.03e-06	0.0489529	0.0285267	0.0861549	0.00273262	22.8525
Female infertility	Prevotella9	rs746764	T	C	-0.0915772	0.0193245	2.04e-06	-0.028751	0.0183839	0.117835	0.00238719	22.4526
Female infertility	Prevotella9	rs117271932	A	G	0.208089	0.0440393	2.82e-06	-0.0277993	0.0328076	0.396803	0.00455608	22.3171
Female infertility	Prevotella9	rs9428102	A	G	-0.0778844	0.0176068	4.62e-06	-0.00876948	0.0182859	0.631529	0.00190281	19.5639
Female infertility	Prevotella9	rs1304512	G	A	0.0761593	0.0165885	5.29e-06	0.0138058	0.0170036	0.416829	0.00214841	21.0739
Female infertility	Prevotella9	rs9613013	G	A	0.0917591	0.0202697	6.1e-06	0.000176988	0.0231201	0.993892	0.00208888	20.4888
Female infertility	Prevotella9	rs7976209	T	C	-0.0870786	0.0197951	7.28e-06	-0.0125134	0.0208743	0.548866	0.00188199	19.3475
Female infertility	Prevotella9	rs12648235	T	C	0.0785902	0.0177676	7.39e-06	0.0213692	0.0179528	0.233931	0.00190126	19.5613
Female infertility	Prevotella9	rs2104588	T	C	0.105558	0.023773	8.13e-06	-0.0320163	0.0327124	0.327718	0.0021228	19.7117
Female infertility	Prevotella9	rs4968431	G	T	0.0640113	0.0144162	8.58e-06	0.0105613	0.0157994	0.503842	0.00191586	19.7118
Female infertility	Prevotella9	rs72815774	T	C	-0.176186	0.0393068	8.78e-06	0.0230646	0.0342707	0.50094	0.00349529	20.0842
Female infertility	Prevotella9	rs7237249	C	T	-0.0823764	0.0182126	8.93e-06	0.0217988	0.0193585	0.260141	0.00198786	20.454
Female infertility	Prevotella9	rs2495052	A	G	0.0838978	0.0188523	8.97e-06	-0.000479148	0.021266	0.982024	0.00201889	19.8008
Female infertility	Prevotella7	rs57404562	C	A	0.155486	0.0316057	6.22e-07	0.0084543	0.0226873	0.709413	0.00689285	24.1883
Female infertility	Prevotella7	rs9959718	G	A	0.133012	0.0275361	1.9e-06	-0.0189922	0.0188376	0.313355	0.00664324	23.3199
Female infertility	Prevotella7	rs9608249	A	G	-0.158213	0.0336317	2.07e-06	0.0353718	0.0241062	0.142286	0.00631551	22.1176
Female infertility	Prevotella7	rs430270	A	C	0.139155	0.0297055	2.87e-06	-0.0249214	0.0192725	0.195976	0.0065703	21.9312
Female infertility	Prevotella7	rs2240542	C	T	0.12085	0.0261776	4.84e-06	-0.0116076	0.0171371	0.498189	0.00607137	21.3002
Female infertility	Prevotella7	rs2918132	C	T	-0.114648	0.0254916	6.42e-06	-0.0155779	0.0156407	0.319256	0.00605937	20.2153
Female infertility	Prevotella7	rs79263163	A	C	-0.143982	0.031501	7.51e-06	0.00913846	0.0187904	0.626728	0.00595216	20.8795
Female infertility	Prevotella7	rs118038478	A	G	0.205676	0.0468917	7.85e-06	-0.00134198	0.0298247	0.964111	0.00580483	19.2269
Female infertility	Prevotella7	rs12195431	T	C	0.196528	0.0442322	8.73e-06	0.0370143	0.0256167	0.148478	0.00562626	19.7298
Female infertility	Prevotella7	rs12124567	A	G	-0.121281	0.0275017	9.49e-06	0.0235314	0.0189536	0.214411	0.00588887	19.4358
Female infertility	Prevotella7	rs9426434	T	C	-0.123657	0.0278514	9.72e-06	-0.0207474	0.0159871	0.194369	0.00590601	19.7007
Female infertility	Phascolarctobacterium	rs75882962	T	C	0.0968661	0.0190575	3.19e-07	-0.0189278	0.0228098	0.406647	0.00240644	25.8303
Female infertility	Phascolarctobacterium	rs56157888	A	C	0.0954864	0.0193976	1.09e-06	0.0063416	0.018356	0.729735	0.00240987	24.227
Female infertility	Phascolarctobacterium	rs56069061	G	A	-0.111306	0.0230694	1.87e-06	0.00463824	0.0304865	0.879076	0.00211045	23.2746
Female infertility	Phascolarctobacterium	rs12618201	A	G	0.0641657	0.0138202	3.38e-06	0.0043001	0.0151666	0.776775	0.001936	21.5526
Female infertility	Phascolarctobacterium	rs74540770	G	A	-0.121014	0.0258621	3.6e-06	-0.00831822	0.0281165	0.767346	0.00232312	21.8905
Female infertility	Phascolarctobacterium	rs1264476	T	G	0.0767335	0.0166041	4.3e-06	0.00444863	0.0193215	0.817904	0.00191966	21.353
Female infertility	Phascolarctobacterium	rs28525131	G	A	-0.118657	0.0269048	8.23e-06	0.0249829	0.0352594	0.478607	0.00185658	19.4466
Female infertility	Phascolarctobacterium	rs7982713	G	A	0.0726922	0.0163201	9.72e-06	0.0307627	0.0169429	0.0694209	0.001849	19.8358
Female infertility	Peptococcus	rs10031059	T	C	-0.121167	0.0225844	1.24e-07	0.00701373	0.0177612	0.692925	0.0051818	28.7734
Female infertility	Peptococcus	rs77681628	C	T	0.200307	0.0387328	2.69e-07	0.0531241	0.0275873	0.0541452	0.00549312	26.7336
Female infertility	Peptococcus	rs62424012	G	A	0.137164	0.0292136	1.15e-06	-0.0275487	0.0316446	0.383991	0.0038825	22.0372
Female infertility	Peptococcus	rs11001941	G	A	-0.195611	0.0392217	1.33e-06	-0.00314257	0.0268022	0.906662	0.00441654	24.8645
Female infertility	Peptococcus	rs2054133	G	A	0.0895433	0.0188332	2.14e-06	0.00878321	0.0159398	0.581618	0.00398017	22.5978
Female infertility	Peptococcus	rs7033353	T	G	0.090152	0.018995	2.22e-06	-0.0224929	0.0151431	0.13745	0.00396606	22.5174
Female infertility	Peptococcus	rs5770862	T	C	0.162018	0.0356813	3.22e-06	0.00913196	0.0259909	0.725324	0.00378197	20.6103
Female infertility	Peptococcus	rs413827	G	A	0.110229	0.0237523	3.3e-06	-0.0293828	0.01764	0.0957745	0.00391328	21.529
Female infertility	Peptococcus	rs72850165	T	C	-0.134304	0.0300423	5.74e-06	-0.0199146	0.0285211	0.485026	0.00353911	19.9782
Female infertility	Peptococcus	rs36121075	A	G	-0.14067	0.030628	6.99e-06	-0.0152666	0.020147	0.448596	0.00396355	21.0864
Female infertility	Peptococcus	rs74592222	G	A	0.137957	0.0302965	8.55e-06	0.00170846	0.0237654	0.942691	0.00387588	20.7272
Female infertility	Peptococcus	rs12069354	C	T	0.16763	0.03795	9.28e-06	0.0370924	0.0312789	0.235679	0.0036323	19.5036
Female infertility	Parasutterella	rs7572229	G	A	0.066273	0.0132736	6.32e-07	-0.000617498	0.0151255	0.967435	0.00218519	24.9242
Female infertility	Parasutterella	rs10899911	A	G	-0.0717102	0.0148151	1.15e-06	0.00233436	0.0177667	0.895467	0.00205346	23.4247
Female infertility	Parasutterella	rs7303158	C	T	0.0646859	0.0134256	1.33e-06	0.00362838	0.0152111	0.811466	0.00203468	23.2101
Female infertility	Parasutterella	rs78383039	T	C	-0.146315	0.0297119	1.57e-06	0.0237586	0.0381051	0.532954	0.00263638	24.2448
Female infertility	Parasutterella	rs6828768	C	T	0.0636852	0.0132645	1.78e-06	0.0104997	0.0151509	0.488306	0.00202043	23.0472
Female infertility	Parasutterella	rs55877868	A	C	-0.104458	0.0228089	2.87e-06	0.0416916	0.0251556	0.0974496	0.00197696	20.9696
Female infertility	Parasutterella	rs2090816	A	C	0.0840967	0.0177315	2.9e-06	-0.00223039	0.019752	0.910094	0.00197187	22.4901
Female infertility	Parasutterella	rs35055552	T	C	0.109554	0.0235433	3.35e-06	-0.0165337	0.0220158	0.452657	0.00216714	21.649
Female infertility	Parasutterella	rs8039785	T	G	0.0618345	0.0133	3.62e-06	0.00836429	0.0151365	0.580545	0.00189529	21.6113
Female infertility	Parasutterella	rs823424	G	A	-0.0713448	0.0156958	4.95e-06	0.0291942	0.0174019	0.0934179	0.00181133	20.6576
Female infertility	Parasutterella	rs62273907	A	G	0.229468	0.0502262	5.88e-06	0.0102657	0.0300225	0.732399	0.0056233	20.8617
Female infertility	Parasutterella	rs7311004	T	C	-0.0617522	0.0136438	5.92e-06	0.00755863	0.015217	0.619385	0.00179621	20.4812
Female infertility	Parasutterella	rs11715853	G	A	-0.0662952	0.0146114	6.23e-06	-0.0186896	0.0165746	0.259485	0.00180478	20.5828
Female infertility	Parasutterella	rs6809952	G	A	-0.0684957	0.0150892	8.13e-06	-0.00202072	0.0171951	0.90645	0.00185681	20.6024
Female infertility	Paraprevotella	rs2081023	A	G	-0.122561	0.0236507	2.64e-07	0.0306043	0.0218143	0.160633	0.00372725	7176
Female infertility	Paraprevotella	rs9602779	A	C	-0.106692	0.0220264	6.93e-07	0.00778397	0.0176665	0.659497	0.00325849	7175
Female infertility	Paraprevotella	rs9900242	A	G	-0.0852967	0.0175212	1.14e-06	-0.00793718	0.0158922	0.61747	0.00342294	6898
Female infertility	Paraprevotella	rs17785622	A	G	0.248065	0.0524304	1.93e-06	0.0023124	0.039629	0.953469	0.00676219	3286
Female infertility	Paraprevotella	rs140997932	T	C	-0.162376	0.0354178	2.11e-06	-0.00112819	0.0331118	0.97282	0.00338567	6185
Female infertility	Paraprevotella	rs4767113	C	T	0.0882466	0.018382	2.14e-06	0.0010638	0.0161321	0.947423	0.00332901	6898
Female infertility	Paraprevotella	rs4756632	G	T	-0.138905	0.0289897	3.82e-06	0.00189777	0.0224962	0.93277	0.00318787	7177
Female infertility	Paraprevotella	rs145020347	A	G	-0.12465	0.0262323	4.03e-06	-0.0385864	0.0214381	0.071877	0.00328112	6857
Female infertility	Paraprevotella	rs3008582	T	C	0.10572	0.0227246	4.36e-06	0.0199496	0.0191773	0.298214	0.00300742	7173
Female infertility	Paraprevotella	rs3801748	G	A	0.0779721	0.0171691	5.2e-06	-0.002284	0.0157453	0.884664	0.00286465	7177
Female infertility	Paraprevotella	rs7240324	T	G	-0.10229	0.0226948	5.96e-06	-0.000644953	0.0175479	0.970681	0.00293556	6898
Female infertility	Paraprevotella	rs10842464	T	C	-0.0758215	0.0172568	6.6e-06	-0.00614074	0.0164731	0.709316	0.00268223	7176
Female infertility	Paraprevotella	rs17109926	A	G	-0.0988335	0.0216172	6.75e-06	0.00426171	0.0169918	0.801961	0.00290325	7177
Female infertility	Parabacteroides	rs60884758	C	T	-0.0702667	0.0142249	5.71e-07	0.0148796	0.0197214	0.450555	0.00140902	24.3978
Female infertility	Parabacteroides	rs115602804	G	A	0.10308	0.0222736	1.93e-06	0.0313454	0.0245302	0.201308	0.00130472	21.4149
Female infertility	Parabacteroides	rs4236095	G	A	0.0761961	0.0157042	1.93e-06	-0.00271695	0.0249697	0.913353	0.00143489	23.5387
Female infertility	Parabacteroides	rs7298818	C	T	0.0888832	0.0200902	8.54e-06	-0.0379727	0.0249705	0.128334	0.00118416	19.5712
Female infertility	Parabacteroides	rs6657302	T	C	-0.10452	0.0225521	9.76e-06	0.0138039	0.0311198	0.657351	0.00129601	21.4768
Female infertility	Oxalobacter	rs736744	C	T	0.117882	0.0211262	2.57e-08	0.00788251	0.0152324	0.60482	0.0066441	31.1218
Female infertility	Oxalobacter	rs4428215	G	A	0.130293	0.0242237	7.51e-08	0.00976491	0.0173913	0.574468	0.00617658	28.9183
Female infertility	Oxalobacter	rs6000536	C	T	-0.130992	0.0253804	2.06e-07	-0.0158349	0.0202433	0.434079	0.00569099	26.626
Female infertility	Oxalobacter	rs36057338	G	T	0.207847	0.0421439	8.8e-07	-0.0213423	0.0423537	0.614328	0.0056985	24.3116
Female infertility	Oxalobacter	rs12002250	A	C	0.217122	0.0466317	1.42e-06	0.0448361	0.0377406	0.23483	0.0050199	21.6693
Female infertility	Oxalobacter	rs10464997	G	A	0.137691	0.0294804	3.3e-06	-0.0279822	0.0195028	0.151351	0.00466939	21.8051
Female infertility	Oxalobacter	rs1569853	T	C	-0.138078	0.0296981	3.65e-06	-0.0118388	0.0231397	0.608914	0.0047892	21.607
Female infertility	Oxalobacter	rs11108500	A	G	-0.199099	0.0427327	3.74e-06	0.0593997	0.0272217	0.0291045	0.00501952	21.6979
Female infertility	Oxalobacter	rs6993398	G	A	0.127217	0.0278855	7.13e-06	0.0384992	0.0194436	0.0476991	0.00445026	20.8041
Female infertility	Oxalobacter	rs111966731	T	C	0.213114	0.047162	7.3e-06	-0.00138009	0.0269748	0.959196	0.00516759	20.4089
Female infertility	Oxalobacter	rs3862635	C	T	-0.172142	0.0394026	9.19e-06	-0.0170438	0.0260754	0.513346	0.00425268	19.0778
Female infertility	Oscillospira	rs12206468	G	A	-0.133016	0.0269733	1.04e-06	-0.0572539	0.0284182	0.043937	0.00253891	24.3134
Female infertility	Oscillospira	rs1954532	T	C	-0.0826246	0.0175252	2.27e-06	0.0235387	0.0189878	0.215096	0.00225359	22.2232
Female infertility	Oscillospira	rs28889936	A	C	0.114051	0.0252838	3.37e-06	0.00327914	0.0255916	0.898043	0.00208087	20.3433
Female infertility	Oscillospira	rs8076323	A	G	0.0715392	0.0156539	5.61e-06	-0.0111227	0.0160963	0.48956	0.00204481	20.8814
Female infertility	Oscillospira	rs72866977	A	C	-0.130569	0.0281674	5.63e-06	-0.00625102	0.0282881	0.82511	0.00235622	21.4828
Female infertility	Oscillospira	rs62422654	C	T	0.0898456	0.0198088	6.47e-06	-0.00614152	0.0185788	0.740972	0.00210142	20.5678
Female infertility	Oscillospira	rs751183	T	C	-0.0774322	0.0172216	6.85e-06	-0.0111018	0.0195416	0.56996	0.00205007	20.2121
Female infertility	Oscillospira	rs12925026	T	C	0.13559	0.030678	9.31e-06	0.0238845	0.032802	0.466526	0.0023766	19.5297
Female infertility	Oscillibacter	rs234108	A	G	0.0749553	0.0152632	9.16e-07	-0.00315203	0.0154141	0.837971	0.00276624	24.1109
Female infertility	Oscillibacter	rs9393920	A	G	-0.0744662	0.0151081	9.92e-07	-0.0124332	0.0155383	0.423616	0.00271311	24.2885
Female infertility	Oscillibacter	rs11627628	T	C	0.143961	0.0290223	1.01e-06	-0.0325929	0.0285633	0.253839	0.0028911	24.5992
Female infertility	Oscillibacter	rs133832	A	C	-0.0795527	0.0162411	1.15e-06	-0.0266117	0.0169011	0.115359	0.00268076	23.9874
Female infertility	Oscillibacter	rs36095275	C	T	-0.0752368	0.0156861	1.4e-06	-0.0112745	0.0154159	0.464562	0.00263914	23.0001
Female infertility	Oscillibacter	rs761240	T	G	-0.17664	0.0388812	2.04e-06	0.00207547	0.0357351	0.953686	0.00396481	20.6314
Female infertility	Oscillibacter	rs16866406	A	G	0.0988765	0.0208795	3.08e-06	0.00167338	0.0209315	0.936281	0.00250498	22.4206
Female infertility	Oscillibacter	rs4506202	A	G	-0.0711323	0.0152261	3.21e-06	-0.00393564	0.0151738	0.79535	0.00250408	21.8201
Female infertility	Oscillibacter	rs61883564	A	G	-0.101351	0.0221016	3.39e-06	0.0336379	0.022092	0.127853	0.00234931	21.024
Female infertility	Oscillibacter	rs12649930	T	G	0.121589	0.0259612	4.09e-06	0.0203648	0.025073	0.416664	0.00248811	21.93
Female infertility	Oscillibacter	rs16934185	A	G	-0.129568	0.028157	4.38e-06	-0.0360301	0.0247806	0.145957	0.0024873	21.1698
Female infertility	Oscillibacter	rs11990279	T	C	-0.0824934	0.0180457	4.94e-06	-0.0352712	0.018885	0.0618059	0.00244444	20.8923
Female infertility	Oscillibacter	rs75453768	G	T	0.12212	0.0268629	5.35e-06	-0.0100669	0.025531	0.693357	0.00249696	20.6615
Female infertility	Olsenella	rs62112538	C	N	-0.19943	0.0407033	1.19e-06	-0.0211656	0.0242736	0.383232	0.00656984	23.993
Female infertility	Olsenella	rs17148768	G	A	0.140434	0.0295602	2.2e-06	0.0291128	0.0203082	0.1517	0.00614891	22.5576
Female infertility	Olsenella	rs72691585	C	A	-0.249079	0.0520814	2.95e-06	0.000577277	0.0221913	0.979246	0.00737606	22.8573
Female infertility	Olsenella	rs2759329	G	A	-0.111131	0.0237218	3.43e-06	-0.0125448	0.0156738	0.423497	0.00583552	21.9353
Female infertility	Olsenella	rs35225860	A	G	-0.223604	0.0482391	3.87e-06	0.0333197	0.0388872	0.39154	0.00588422	21.4743
Female infertility	Olsenella	rs1035588	A	G	-0.108148	0.0236848	4.86e-06	-0.0106262	0.0156551	0.497283	0.00554536	20.8386
Female infertility	Olsenella	rs7540303	C	T	0.108044	0.023638	5.32e-06	0.0174425	0.0156306	0.264456	0.00555654	20.8808
Female infertility	Olsenella	rs61090148	A	G	-0.104783	0.0231343	6.44e-06	0.019581	0.0153073	0.200829	0.00545678	20.5039
Female infertility	Olsenella	rs9460691	C	A	0.119966	0.0268645	7.28e-06	-0.0271703	0.0193433	0.160129	0.00530508	19.9308
Female infertility	Olsenella	rs8066522	G	A	-0.106529	0.0240379	9.7e-06	0.00451774	0.016093	0.77892	0.00522529	19.6295
Female infertility	Odoribacter	rs77779484	G	A	-0.0577795	0.0125389	3.67e-06	0.0351405	0.0316252	0.2665	0.00206633	24.7086
Female infertility	Odoribacter	rs10093869	A	G	0.0550695	0.0121164	6.58e-06	-0.0104536	0.0153523	0.495924	0.00149121	21.2308
Female infertility	Odoribacter	rs28417404	A	G	-0.0726896	0.0161372	3.68e-06	-0.0378572	0.0255458	0.138358	0.00137858	20.2876
Female infertility	Odoribacter	rs4793970	A	G	-0.0576329	0.0129154	6.03e-06	-0.00805749	0.0158017	0.610111	0.00135395	19.9098
Female infertility	Odoribacter	rs6856150	G	A	0.0881922	0.0194146	6.06e-06	0.000134499	0.02306	0.995346	0.00141164	20.6321
Female infertility	Odoribacter	rs10423795	C	T	0.121449	0.0264106	9.49e-06	-0.0201082	0.0156275	0.198193	0.0014593	20.6544
Female infertility	Odoribacter	rs74553962	T	G	-0.133489	0.0268526	6.56e-07	-0.0248813	0.0288688	0.388756	0.00178839	21.1426
Female infertility	Methanobrevibacter	rs76029318	T	C	0.222849	0.0454319	1.08e-06	-0.0235497	0.0313542	0.4526	0.00705357	24.0459
Female infertility	Methanobrevibacter	rs10202904	T	G	-0.112811	0.0239106	3.09e-06	0.0265745	0.0154155	0.0847286	0.00617426	22.2474
Female infertility	Methanobrevibacter	rs894996	C	A	0.214213	0.0456045	3.82e-06	-0.0139053	0.0298369	0.641184	0.00630195	22.0509
Female infertility	Methanobrevibacter	rs1334944	T	C	0.115197	0.0255492	7.61e-06	-0.00640595	0.0168214	0.703336	0.00563712	20.318
Female infertility	Methanobrevibacter	rs6776814	T	C	-0.188956	0.0419905	8.05e-06	0.0341005	0.0538857	0.526845	0.00613025	20.2374
Female infertility	Methanobrevibacter	rs4802933	A	G	-0.135628	0.0308139	9.74e-06	0.000834188	0.0179477	0.962929	0.00537352	19.3627
Female infertility	Marvinbryantia	rs2724813	A	G	-0.0840769	0.0167551	6.28e-07	-0.0073016	0.0178196	0.681988	0.00216415	25.1759
Female infertility	Marvinbryantia	rs2842896	C	T	-0.0649396	0.0131146	7.25e-07	-0.00883592	0.0154124	0.566443	0.00208967	24.515
Female infertility	Marvinbryantia	rs61884471	G	A	0.124426	0.0248431	1.01e-06	-0.00606603	0.0242925	0.802814	0.00216546	25.0806
Female infertility	Marvinbryantia	rs1187983	C	T	-0.0935456	0.0193174	2.02e-06	-0.00671167	0.024919	0.787668	0.00196739	23.4463
Female infertility	Marvinbryantia	rs2863363	A	G	0.0634861	0.0136323	3.11e-06	0.00660821	0.0176151	0.707553	0.00181161	21.6844
Female infertility	Marvinbryantia	rs72948274	A	C	-0.126354	0.0272212	3.26e-06	0.00853655	0.0306735	0.780779	0.0018602	21.5421
Female infertility	Marvinbryantia	rs3125832	A	C	0.0679323	0.015012	5.03e-06	0.00020762	0.0181088	0.990852	0.00174581	20.4739
Female infertility	Marvinbryantia	rs8006832	G	T	-0.0952415	0.0216699	6.58e-06	-0.0324261	0.0262977	0.217561	0.00168983	19.3136
Female infertility	Marvinbryantia	rs146541147	G	A	0.118845	0.0268423	6.86e-06	-0.0788238	0.0421219	0.0612999	0.00181551	19.5995
Female infertility	Marvinbryantia	rs11620597	T	C	0.119479	0.0271688	7.8e-06	-0.0556721	0.0496358	0.262027	0.00175013	19.336
Female infertility	Lactococcus	rs123059	T	C	-0.13671	0.0274694	1.27e-06	0.0148247	0.0183967	0.42034	0.00654429	24.7555
Female infertility	Lactococcus	rs10417872	T	G	0.118306	0.024522	1.29e-06	-0.00870157	0.0167032	0.6024	0.00570582	23.2641
Female infertility	Lactococcus	rs2293361	C	T	-0.199221	0.0430969	1.4e-06	0.0279268	0.0336139	0.406079	0.00561099	21.3574
Female infertility	Lactococcus	rs4766997	C	T	0.114599	0.023839	2.06e-06	0.003548	0.0152852	0.816445	0.00566945	23.0979
Female infertility	Lactococcus	rs55910161	C	T	0.146426	0.0307367	2.36e-06	-0.035902	0.0240692	0.1358	0.00588141	22.6827
Female infertility	Lactococcus	rs7992246	T	C	0.104232	0.0230786	4.45e-06	-0.00569429	0.0155257	0.713793	0.00500264	20.3877
Female infertility	Lactococcus	rs6674304	C	T	0.200758	0.0442121	6.18e-06	0.0227864	0.0403538	0.5723	0.00530096	20.608
Female infertility	Lactococcus	rs17168302	G	A	0.191857	0.0424761	6.29e-06	-0.0166476	0.0245168	0.49712	0.00504565	20.3915
Female infertility	Lactococcus	rs12621813	G	A	0.108423	0.0239978	6.61e-06	-0.0188571	0.0171909	0.272673	0.00500624	20.4025
Female infertility	Lactobacillus	rs921925	A	C	0.0985077	0.0203229	9.72e-07	0.00736981	0.0184775	0.690001	0.00336817	23.4879
Female infertility	Lactobacillus	rs16861661	G	A	-0.183147	0.038148	1.28e-06	0.0123264	0.0303909	0.68504	0.00430983	23.0405
Female infertility	Lactobacillus	rs62314653	C	A	0.187692	0.0394585	2.24e-06	0.0501433	0.0321935	0.119338	0.00379212	22.6185
Female infertility	Lactobacillus	rs7399658	G	A	-0.107134	0.0221883	3.12e-06	-0.0412572	0.0197204	0.0364292	0.003513	23.3063
Female infertility	Lactobacillus	rs768253	T	G	-0.079195	0.0171791	4.25e-06	-0.00657799	0.015211	0.665414	0.00304499	21.2456
Female infertility	Lactobacillus	rs1530559	G	A	0.0804001	0.0178207	4.93e-06	-0.0395484	0.0152251	0.00938837	0.00304921	20.3484
Female infertility	Lactobacillus	rs77478751	A	G	-0.219886	0.0475759	7.33e-06	0.0109835	0.0236006	0.641653	0.0057883	21.3493
Female infertility	Lactobacillus	rs12693845	C	T	-0.0805447	0.0177429	8.96e-06	-0.0111984	0.0156209	0.473442	0.00295296	20.6016
Female infertility	LachnospiraceaeUCG010	rs11192447	A	G	0.126592	0.024345	4.69e-07	0.0353555	0.034549	0.306146	0.00212538	27.0349
Female infertility	LachnospiraceaeUCG010	rs9981767	A	C	0.0655062	0.0131994	9.96e-07	0.0185263	0.0174695	0.28892	0.00191809	24.6256
Female infertility	LachnospiraceaeUCG010	rs12346653	C	T	0.0657686	0.0139569	2.7e-06	0.0180217	0.0186188	0.333079	0.00172963	22.2019
Female infertility	LachnospiraceaeUCG010	rs74315802	G	T	0.0867262	0.0183477	3.19e-06	-0.0291126	0.0198837	0.143154	0.00175412	22.3393
Female infertility	LachnospiraceaeUCG010	rs10414815	T	C	0.10453	0.0230253	4.24e-06	-0.0285762	0.036603	0.434976	0.00177905	20.606
Female infertility	LachnospiraceaeUCG010	rs72894957	G	A	0.222263	0.0486425	5.68e-06	-0.0362874	0.0502505	0.470214	0.00481421	20.869
Female infertility	LachnospiraceaeUCG010	rs336138	G	T	0.0779543	0.0171865	7.48e-06	-0.0398235	0.0237481	0.09356	0.00155193	20.5701
Female infertility	LachnospiraceaeUCG010	rs4576377	A	C	-0.0572001	0.0127043	7.63e-06	-0.00548326	0.0157108	0.72708	0.00153049	20.2687
Female infertility	LachnospiraceaeUCG010	rs17730011	G	A	-0.0702357	0.015706	7.85e-06	-0.0259165	0.018444	0.159979	0.00150973	19.9949
Female infertility	LachnospiraceaeUCG010	rs2833528	C	T	-0.0562148	0.0127763	9.92e-06	-0.0130324	0.0156553	0.405149	0.00146082	19.3564
Female infertility	LachnospiraceaeUCG008	rs10793103	C	T	0.0974344	0.0181279	9.35e-08	0.0410157	0.0151363	0.00673333	0.00410183	28.8805
Female infertility	LachnospiraceaeUCG008	rs67078837	T	C	-0.0845848	0.0170693	7.68e-07	0.00995113	0.0153258	0.516141	0.00348777	24.5489
Female infertility	LachnospiraceaeUCG008	rs10741777	T	C	-0.0973842	0.0194791	7.69e-07	-0.00222821	0.0163474	0.891581	0.00355081	24.987
Female infertility	LachnospiraceaeUCG008	rs10801803	G	A	-0.117029	0.0243085	1.4e-06	0.00268367	0.0216048	0.901144	0.00329222	23.1712
Female infertility	LachnospiraceaeUCG008	rs62277846	C	T	0.102292	0.0212319	1.59e-06	-0.0317504	0.0191776	0.0978048	0.00329751	23.2052
Female infertility	LachnospiraceaeUCG008	rs955844	A	C	0.112064	0.0228369	1.81e-06	-0.0200987	0.0218151	0.356883	0.00349641	24.0731
Female infertility	LachnospiraceaeUCG008	rs13024781	T	C	-0.0798769	0.0168846	2.29e-06	0.00877009	0.0151622	0.562981	0.00317973	22.3738
Female infertility	LachnospiraceaeUCG008	rs57091572	A	G	-0.110443	0.0235801	2.86e-06	-0.00164311	0.0223266	0.941333	0.0031465	21.9309
Female infertility	LachnospiraceaeUCG008	rs61944774	A	G	0.179838	0.0393797	6.34e-06	-0.061278	0.0340508	0.0719234	0.00346385	20.8484
Female infertility	LachnospiraceaeUCG008	rs75356640	G	A	0.136523	0.0303128	9.83e-06	-0.00750123	0.0230327	0.744669	0.00314814	20.2781
Female infertility	LachnospiraceaeUCG004	rs12747809	G	A	-0.062197	0.0125685	8.65e-07	0.00461441	0.0168317	0.783969	0.012405	181.655
Female infertility	LachnospiraceaeUCG004	rs2882478	G	A	-0.0577091	0.0118338	1.21e-06	0.0245935	0.0152183	0.106083	0.000380482	5.50538
Female infertility	LachnospiraceaeUCG004	rs12673420	G	A	0.0554351	0.0118375	2.98e-06	-0.000377215	0.0151037	0.980075	0.598917	21593.9
Female infertility	LachnospiraceaeUCG004	rs12894272	A	G	0.0579792	0.0125229	4.34e-06	-0.0214709	0.0159746	0.178926	0.000503926	7.29095
Female infertility	LachnospiraceaeUCG004	rs11128180	A	G	0.0648288	0.0140126	4.52e-06	0.0241571	0.0178598	0.176184	0.000497601	7.20088
Female infertility	LachnospiraceaeUCG004	rs2444793	C	T	-0.0542433	0.0118188	4.77e-06	-0.0296156	0.0155462	0.0567793	0.000231896	3.35422
Female infertility	LachnospiraceaeUCG004	rs35182105	A	G	-0.109724	0.024221	4.87e-06	-0.0376301	0.0333801	0.259606	0.000645162	8.50098
Female infertility	LachnospiraceaeUCG004	rs6656451	C	T	-0.05436	0.011947	5.57e-06	0.0218178	0.0150989	0.148461	0.000429183	6.20693
Female infertility	LachnospiraceaeUCG004	rs7629954	A	G	0.108441	0.023825	5.77e-06	0.00563682	0.0370018	0.878919	0.0286054	370.04
Female infertility	LachnospiraceaeUCG004	rs233486	A	G	-0.0799088	0.017766	6.28e-06	0.0211971	0.021918	0.333489	0.0010355	14.2093
Female infertility	LachnospiraceaeUCG004	rs12072562	T	C	0.0548397	0.0120844	6.3e-06	0.0151796	0.0393534	0.6997	0.005287	76.8776
Female infertility	LachnospiraceaeUCG004	rs2706242	G	C	0.133104	0.0303566	7.07e-06	-0.00602614	0.0271213	0.824164	0.0238034	223.698
Female infertility	LachnospiraceaeUCG001	rs437876	T	C	0.0784637	0.0144768	7.17e-08	-0.00928235	0.0158786	0.558829	0.00288584	29.3703
Female infertility	LachnospiraceaeUCG001	rs985416	C	T	0.0970258	0.0181807	1.46e-07	-0.00620817	0.0197269	0.752984	0.0028637	28.4752
Female infertility	LachnospiraceaeUCG001	rs2050911	G	A	0.0751466	0.0153934	1.11e-06	-0.025868	0.0159483	0.104805	0.00234287	23.8266
Female infertility	LachnospiraceaeUCG001	rs573933	T	C	-0.107898	0.0232346	3.11e-06	0.000708342	0.0245948	0.977024	0.00212017	21.5612
Female infertility	LachnospiraceaeUCG001	rs74034332	G	A	0.168045	0.0382637	3.33e-06	0.0192268	0.0312811	0.538788	0.00320218	19.2813
Female infertility	LachnospiraceaeUCG001	rs78848836	A	G	-0.118868	0.0259753	3.38e-06	-0.029078	0.0248681	0.242287	0.00219814	20.9371
Female infertility	LachnospiraceaeUCG001	rs9403580	C	T	0.107801	0.0229777	3.47e-06	0.000238521	0.0224246	0.991513	0.00217558	22.006
Female infertility	LachnospiraceaeUCG001	rs62496417	T	G	-0.0748504	0.0165681	5.88e-06	0.0303135	0.0184204	0.0998344	0.00200681	20.4061
Female infertility	LachnospiraceaeUCG001	rs4981345	T	C	-0.0681973	0.0149831	6.09e-06	-0.0101203	0.0160885	0.529323	0.0020755	20.7129
Female infertility	LachnospiraceaeUCG001	rs12131224	C	T	0.117095	0.02591	7.4e-06	-0.00451289	0.0241874	0.85199	0.00210637	20.42
Female infertility	LachnospiraceaeUCG001	rs2371284	T	C	-0.0761893	0.0170127	7.56e-06	-0.0283983	0.0180693	0.116036	0.0020094	20.0519
Female infertility	LachnospiraceaeUCG001	rs7341608	T	C	-0.0784757	0.0177648	9.48e-06	-0.025684	0.0221623	0.246496	0.00196389	19.5103
Female infertility	LachnospiraceaeNK4A136group	rs954878	A	G	-0.0520656	0.0109082	1.78e-06	0.0167186	0.0156415	0.285131	0.00132072	22.7795
Female infertility	LachnospiraceaeNK4A136group	rs160061	A	G	0.0513831	0.0108094	2.12e-06	-0.00983993	0.015126	0.51535	0.00130943	22.5936
Female infertility	LachnospiraceaeNK4A136group	rs68104925	T	C	-0.0549104	0.0115385	2.37e-06	0.0129105	0.0164146	0.43156	0.00131289	22.6443
Female infertility	LachnospiraceaeNK4A136group	rs7616165	G	T	-0.230542	0.0483465	2.77e-06	-0.0261761	0.0486174	0.590293	0.00552354	22.7279
Female infertility	LachnospiraceaeNK4A136group	rs76193507	A	G	-0.22973	0.0499776	2.93e-06	0.0369484	0.0268522	0.168824	0.00587068	21.1175
Female infertility	LachnospiraceaeNK4A136group	rs73044693	A	G	-0.10758	0.0229884	3.57e-06	-0.00147994	0.0301906	0.960904	0.00171162	21.8965
Female infertility	LachnospiraceaeNK4A136group	rs7832116	A	G	-0.0714756	0.0151703	3.57e-06	0.0387519	0.0226093	0.0865326	0.00128754	22.1961
Female infertility	LachnospiraceaeNK4A136group	rs11263806	A	G	-0.0524615	0.0116758	5.07e-06	0.0117182	0.0159549	0.46267	0.00116994	20.1864
Female infertility	LachnospiraceaeNK4A136group	rs7073658	T	G	-0.0499621	0.0109693	5.27e-06	0.0354868	0.015161	0.0192495	0.00120217	20.7432
Female infertility	LachnospiraceaeNK4A136group	rs2880566	T	C	0.0599578	0.0134693	5.61e-06	0.0309609	0.0214373	0.148667	0.0011486	19.8132
Female infertility	LachnospiraceaeNK4A136group	rs12611395	A	G	-0.0902532	0.0199652	5.83e-06	-0.019825	0.0245851	0.420023	0.00123801	20.4326
Female infertility	LachnospiraceaeNK4A136group	rs4955932	T	C	-0.0492283	0.0109388	7.05e-06	-0.0284478	0.0156779	0.0696001	0.00117367	20.2508
Female infertility	LachnospiraceaeNK4A136group	rs10952110	G	T	0.0487709	0.0109614	9.08e-06	-0.0108822	0.015279	0.476319	0.00117949	19.794
Female infertility	LachnospiraceaeNK4A136group	rs28540839	A	C	0.0508285	0.0110591	9.34e-06	0.0139463	0.0151572	0.357515	0.00125849	21.1214
Female infertility	LachnospiraceaeNK4A136group	rs59805249	T	C	0.0936162	0.0207982	9.45e-06	-0.0121179	0.0262446	0.644276	0.00133159	20.2578
Female infertility	LachnospiraceaeND3007group	rs9932954	A	G	-0.0561864	0.0115984	1.25e-06	-0.00100862	0.0160308	0.949832	0.0015393	23.4643
Female infertility	LachnospiraceaeND3007group	rs2861203	G	A	0.0572304	0.0127279	7.37e-06	0.0285654	0.0166556	0.0863336	0.00131927	20.2155
Female infertility	LachnospiraceaeND3007group	rs72776675	T	C	-0.0647067	0.014797	8.72e-06	-0.0209117	0.0201097	0.298395	0.00124813	19.1203
Female infertility	LachnospiraceaeNC2004group	rs117467633	T	C	0.0994748	0.0209139	2.92e-06	0.0496722	0.0392583	0.205776	0.00359064	22.616
Female infertility	LachnospiraceaeNC2004group	rs12127733	G	A	0.115182	0.0246006	3.11e-06	-0.0123219	0.0197028	0.531716	0.00350863	21.9146
Female infertility	LachnospiraceaeNC2004group	rs12208226	C	A	-0.0883469	0.0188397	3.33e-06	0.0354658	0.0244602	0.147076	0.00346308	21.9836
Female infertility	LachnospiraceaeNC2004group	rs12863463	G	A	-0.154631	0.0352194	5.61e-06	-0.0299718	0.0282996	0.28956	0.00431412	19.268
Female infertility	LachnospiraceaeNC2004group	rs17067076	G	A	-0.156365	0.0345372	6.04e-06	0.0221756	0.0236432	0.348281	0.00370229	20.4903
Female infertility	LachnospiraceaeNC2004group	rs1928659	T	C	0.102522	0.0226445	6.17e-06	-0.00458014	0.0189102	0.808621	0.00370231	20.4904
Female infertility	LachnospiraceaeNC2004group	rs1929743	T	C	0.0837206	0.0190318	9.06e-06	0.00116885	0.015952	0.941589	0.00304771	19.3449
Female infertility	LachnospiraceaeNC2004group	rs3756315	A	G	-0.169687	0.0383169	9.13e-06	-0.0396566	0.0165698	0.0166971	0.00384803	19.6042
Female infertility	LachnospiraceaeNC2004group	rs6116753	G	A	-0.154739	0.0340372	9.75e-06	0.000864294	0.0197684	0.965127	0.00366405	20.6603
Female infertility	LachnospiraceaeFCS020group	rs7249113	G	A	0.0679483	0.0133496	3.72e-07	-0.0090687	0.0165636	0.58403	0.00413089	56.131
Female infertility	LachnospiraceaeFCS020group	rs9788306	C	T	-0.062804	0.0130744	1.39e-06	-0.0013767	0.016694	0.934276	0.131275	2080.81
Female infertility	LachnospiraceaeFCS020group	rs1363769	T	C	-0.200628	0.0449372	1.58e-06	-0.00102692	0.0428214	0.980867	0.914797	38147.6
Female infertility	LachnospiraceaeFCS020group	rs72793667	A	G	-0.116881	0.0246589	1.63e-06	0.0542647	0.0388097	0.162046	0.000374117	4.63854
Female infertility	LachnospiraceaeFCS020group	rs35035870	T	C	-0.190615	0.0414403	2.62e-06	-0.0301998	0.0389303	0.437902	0.00701162	39.8248
Female infertility	LachnospiraceaeFCS020group	rs10093861	G	A	-0.0568869	0.0121152	3.06e-06	0.00027899	0.0154045	0.98555	0.751176	41570.4
Female infertility	LachnospiraceaeFCS020group	rs2862811	T	C	0.0564927	0.0121736	3.92e-06	-0.00357064	0.0165411	0.829093	0.0178514	250.282
Female infertility	LachnospiraceaeFCS020group	rs2322265	C	T	-0.0666305	0.0141577	5.21e-06	0.00661634	0.0172139	0.700711	0.00731016	101.402
Female infertility	LachnospiraceaeFCS020group	rs1254846	G	A	0.105963	0.0232501	5.6e-06	0.0168353	0.0215644	0.434981	0.00299853	39.6094
Female infertility	LachnospiraceaeFCS020group	rs3999074	G	T	-0.0550587	0.0121847	6.55e-06	-0.0119648	0.0151673	0.4302	0.00153524	21.1727
Female infertility	LachnospiraceaeFCS020group	rs9308097	A	G	0.055381	0.0123659	7.47e-06	-0.00420007	0.0151099	0.781038	0.0126761	173.838
Female infertility	LachnospiraceaeFCS020group	rs4452603	T	G	0.0604208	0.0135965	8.98e-06	0.0104544	0.0171853	0.542968	0.0024705	33.3972
Female infertility	Lachnospira	rs13157098	A	G	-0.0768058	0.0155312	5.99e-07	0.0233619	0.0204902	0.254224	0.00153121	24.4525
Female infertility	Lachnospira	rs4923324	G	A	-0.0617321	0.0133387	2.44e-06	0.0144294	0.020559	0.482771	0.00129722	21.4163
Female infertility	Lachnospira	rs4686798	T	C	0.0531826	0.0113747	2.74e-06	0.0177241	0.0157177	0.259466	0.00132335	21.8576
Female infertility	Lachnospira	rs56791201	T	C	0.051823	0.0110697	2.93e-06	-0.00748236	0.0157038	0.63374	0.00132765	21.9141
Female infertility	Lachnospira	rs159484	G	A	0.0794668	0.0176999	6.68e-06	0.0143287	0.0289279	0.620372	0.00122112	20.1548
Female infertility	Lachnospira	rs2520509	A	G	0.0519063	0.011578	7.42e-06	0.00710256	0.0166493	0.669672	0.00121664	20.0966
Female infertility	Lachnoclostridium	rs6112314	A	C	-0.0561715	0.0108174	2.43e-07	0.0201623	0.0160402	0.208759	0.00150899	26.961
Female infertility	Lachnoclostridium	rs62285313	A	G	0.0864203	0.0181565	1.58e-06	-0.0225121	0.0255981	0.37916	0.00133158	22.6524
Female infertility	Lachnoclostridium	rs615997	T	C	0.0511752	0.0106491	2.03e-06	-0.0109657	0.0150545	0.466368	0.00128771	23.0913
Female infertility	Lachnoclostridium	rs78068103	A	G	0.0886199	0.0194248	3.67e-06	-0.0541619	0.0235185	0.0212819	0.0011895	20.8113
Female infertility	Lachnoclostridium	rs789029	C	T	-0.0641289	0.0137974	3.75e-06	-0.0150445	0.021697	0.488065	0.00120393	21.6005
Female infertility	Lachnoclostridium	rs4738679	G	A	-0.0520267	0.011404	4.42e-06	-0.0173785	0.0155668	0.26426	0.00116003	20.8106
Female infertility	Lachnoclostridium	rs72829893	G	T	0.117472	0.0268103	5.58e-06	0.00444353	0.0246729	0.857076	0.00154538	19.1954
Female infertility	Lachnoclostridium	rs1997204	T	C	-0.108075	0.0242022	5.97e-06	0.0260883	0.0367629	0.47793	0.00140844	19.9378
Female infertility	Lachnoclostridium	rs1031599	G	T	-0.078627	0.0175644	6.31e-06	-0.0159265	0.0308502	0.605678	0.00115047	20.0367
Female infertility	Lachnoclostridium	rs3821998	C	A	-0.0864066	0.0192519	6.72e-06	0.0626723	0.0244445	0.0103517	0.00112284	20.1417
Female infertility	Lachnoclostridium	rs2385421	A	G	0.0746186	0.0180734	7.14e-06	0.0220372	0.02338	0.345903	0.000951206	17.0438
Female infertility	Lachnoclostridium	rs12566975	T	C	-0.0468097	0.0105787	9.57e-06	-0.00573634	0.0151529	0.705013	0.00109137	19.5776
Female infertility	Lachnoclostridium	rs1528479	G	A	-0.0497798	0.0111919	9.64e-06	-0.0133198	0.0157027	0.396299	0.00113068	19.781
Female infertility	Intestinimonas	rs10262702	T	C	0.0918017	0.0194885	2.06e-06	-0.0110445	0.022932	0.630078	0.00188234	22.1857
Female infertility	Intestinimonas	rs11258178	A	G	0.0660742	0.0134139	6.98e-07	-0.0118971	0.0151354	0.431842	0.00205793	24.2595
Female infertility	Intestinimonas	rs12226153	A	G	-0.151142	0.0306922	5.12e-07	0.0619368	0.0650066	0.340703	0.0026804	24.2449
Female infertility	Intestinimonas	rs17067892	C	T	0.107194	0.0250013	6.38e-06	-0.0419086	0.02671	0.116643	0.00158988	18.3797
Female infertility	Intestinimonas	rs1859797	G	A	0.060368	0.0131793	4.12e-06	-6.32908e-05	0.0151329	0.996663	0.00178004	20.9777
Female infertility	Intestinimonas	rs2276760	A	G	-0.0685233	0.0152546	7.84e-06	-0.0143575	0.0177013	0.417309	0.00166744	20.1746
Female infertility	Intestinimonas	rs2731794	C	T	0.120632	0.0257529	1.92e-06	-0.000774746	0.0411545	0.98498	0.00197657	21.9379
Female infertility	Intestinimonas	rs2930225	G	T	0.0729524	0.0152948	1.35e-06	0.0039355	0.0178816	0.825804	0.00189181	22.7466
Female infertility	Intestinimonas	rs4113676	A	C	-0.218507	0.0490152	7.42e-06	0.064109	0.0643684	0.319265	0.00623011	19.8607
Female infertility	Intestinimonas	rs4784055	T	C	-0.175324	0.038599	8.72e-07	0.0460506	0.0351106	0.189659	0.00641998	20.6185
Female infertility	Intestinimonas	rs62240188	G	A	0.130074	0.0267179	2.2e-06	0.0556923	0.0260862	0.0327657	0.00230655	23.6968
Female infertility	Intestinimonas	rs6934519	C	T	0.0692373	0.0151154	8.57e-06	0.0279867	0.0172861	0.10544	0.00173261	20.9784
Female infertility	Intestinimonas	rs716604	A	G	0.0818068	0.0165992	8.57e-07	0.0132498	0.0179661	0.460825	0.00200496	24.2846
Female infertility	Intestinimonas	rs7170984	T	C	-0.0658116	0.0140767	2.98e-06	0.00381097	0.0168386	0.820949	0.00180464	21.8539
Female infertility	Intestinimonas	rs72982915	C	T	0.183158	0.0402743	4.91e-06	0.000831499	0.0327371	0.979737	0.00368555	20.6748
Female infertility	Intestinimonas	rs9823439	T	C	-0.0581947	0.0131455	9.86e-06	-0.0291529	0.0152554	0.0560054	0.00166289	19.5948
Female infertility	Intestinibacter	rs10805326	G	A	0.0775151	0.0139665	3.55e-08	-0.0306409	0.0165752	0.0645164	0.00249748	30.7984
Female infertility	Intestinibacter	rs4327025	G	A	-0.0810346	0.0154397	1.64e-07	-0.00456319	0.0194404	0.81442	0.002234	27.5419
Female infertility	Intestinibacter	rs16938435	T	C	-0.112189	0.0235439	1.8e-06	-0.0477526	0.0254792	0.0609046	0.00184217	22.7023
Female infertility	Intestinibacter	rs478972	T	C	-0.142681	0.0297116	1.82e-06	0.0163571	0.0261847	0.532179	0.00222682	23.0566
Female infertility	Intestinibacter	rs118030283	G	A	-0.151829	0.0324471	2.67e-06	0.0154181	0.0361539	0.669775	0.00247355	21.8907
Female infertility	Intestinibacter	rs6875660	C	T	0.0890455	0.0193905	3.06e-06	0.0373536	0.0318142	0.240349	0.00171255	21.0851
Female infertility	Intestinibacter	rs2702387	A	G	0.0608559	0.0132145	4.26e-06	-0.00376787	0.0153613	0.806237	0.00172252	21.2046
Female infertility	Intestinibacter	rs11109097	C	T	0.0624272	0.0138539	5.49e-06	-0.00696753	0.0152719	0.648224	0.0017054	20.3016
Female infertility	Intestinibacter	rs447950	A	G	0.0628342	0.0136652	5.64e-06	-0.0197641	0.015622	0.20582	0.00171554	21.1391
Female infertility	Intestinibacter	rs9348442	C	T	0.099082	0.0221625	6.26e-06	0.0471444	0.022717	0.0379603	0.00162194	19.9839
Female infertility	Intestinibacter	rs6062862	A	G	0.0924508	0.0204658	6.68e-06	0.0297233	0.0275238	0.280181	0.00167136	20.4029
Female infertility	Intestinibacter	rs2098844	C	T	-0.0575295	0.0128416	6.79e-06	0.0187578	0.0157405	0.233384	0.00163023	20.0667
Female infertility	Intestinibacter	rs62430350	T	C	0.151096	0.0351476	6.84e-06	-0.0352553	0.0400543	0.378758	0.00240992	18.4756
Female infertility	Intestinibacter	rs893394	G	A	0.0583322	0.0130729	7.85e-06	-0.0205536	0.0154078	0.182213	0.00167227	19.9066
Female infertility	Intestinibacter	rs68093214	C	T	0.0662258	0.0149877	9.26e-06	-0.0159183	0.0176572	0.367314	0.00163996	19.5213
Female infertility	Hungatella	rs13128780	T	C	-0.149725	0.0312777	1.75e-06	-0.01628	0.0193862	0.401035	0.00569753	22.9035
Female infertility	Hungatella	rs72759041	G	T	-0.126025	0.0282242	3.86e-06	0.0305232	0.0186947	0.102529	0.00507322	19.9272
Female infertility	Hungatella	rs17092615	G	A	0.152235	0.0337867	7.38e-06	0.0220942	0.0219175	0.313424	0.00503854	20.2917
Female infertility	Hungatella	rs10044993	C	A	0.139547	0.0316748	8.07e-06	-0.02386	0.0273009	0.382138	0.00459025	19.4002
Female infertility	Hungatella	rs13249325	T	G	-0.100023	0.0225883	9.69e-06	0.00151855	0.0151163	0.919981	0.00463693	19.5984
Female infertility	Howardella	rs17167098	G	A	-0.169366	0.0352068	1.12e-06	-0.0203421	0.0220185	0.355555	0.00641201	23.1289
Female infertility	Howardella	rs1484873	A	G	-0.227831	0.046335	2.56e-06	-0.00396777	0.0209369	0.849693	0.00665642	24.1639
Female infertility	Howardella	rs609430	T	G	-0.112045	0.0239328	3.34e-06	0.0375171	0.0158487	0.0179226	0.00573782	21.9065
Female infertility	Howardella	rs672217	G	A	0.164146	0.0349993	3.52e-06	-0.0246032	0.0189793	0.194866	0.00605447	21.9837
Female infertility	Howardella	rs12452946	A	G	-0.105833	0.0228941	3.8e-06	0.0242119	0.0150916	0.108642	0.00559213	21.3584
Female infertility	Howardella	rs36081916	T	C	-0.18123	0.0402987	4.7e-06	-0.016859	0.0270347	0.532887	0.00624939	20.2119
Female infertility	Howardella	rs10048062	C	T	-0.147352	0.0336531	8.59e-06	0.0199537	0.0265072	0.451593	0.00501988	19.1617
Female infertility	Howardella	rs3791893	A	G	0.147035	0.034023	9.5e-06	-0.00952445	0.0217011	0.660741	0.00489727	18.6668
Female infertility	Howardella	rs2154047	C	A	-0.192557	0.0420093	9.97e-06	-0.0194627	0.0266585	0.465345	0.00576564	20.9985
Female infertility	Holdemania	rs1867876	T	C	0.0842919	0.0162192	2.74e-07	0.000351962	0.0165173	0.982999	0.00295636	27.0034
Female infertility	Holdemania	rs9500080	C	T	0.0926764	0.0178886	4.09e-07	0.0106317	0.0201592	0.597924	0.00293886	26.8343
Female infertility	Holdemania	rs77293403	A	G	0.164556	0.0341775	1.77e-06	-0.0113974	0.0409204	0.78061	0.00304698	23.1758
Female infertility	Holdemania	rs116500994	G	T	-0.13755	0.0293386	2.34e-06	0.00870326	0.0359193	0.808548	0.00260006	21.9757
Female infertility	Holdemania	rs111745969	A	G	0.120677	0.0265781	3.71e-06	-0.0286934	0.0221229	0.194632	0.00249779	20.6108
Female infertility	Holdemania	rs9529719	T	C	0.074038	0.0160494	5.97e-06	0.000550953	0.0162134	0.972892	0.00233131	21.2762
Female infertility	Holdemania	rs80149660	C	T	-0.232987	0.0519183	6.04e-06	0.0124218	0.0373176	0.739236	0.00609673	20.1261
Female infertility	Holdemania	rs11080063	G	A	-0.0665238	0.0149837	6.67e-06	-0.0248246	0.0153749	0.106394	0.00216068	19.7069
Female infertility	Holdemania	rs4146507	C	T	0.079488	0.0177002	7.23e-06	-0.0164102	0.0176523	0.352562	0.00220934	20.1628
Female infertility	Holdemania	rs73139538	G	A	-0.148594	0.0327469	7.77e-06	0.052962	0.0446399	0.235453	0.00253711	20.5851
Female infertility	Holdemania	rs967319	T	C	0.0788638	0.0176744	8.38e-06	-0.0321275	0.0176409	0.0685772	0.0021812	19.9054
Female infertility	Holdemania	rs10885477	T	C	-0.135137	0.0301894	8.6e-06	0.0793886	0.0345772	0.021677	0.00230047	20.0325
Female infertility	Holdemania	rs113593397	A	G	-0.128935	0.0282526	9.36e-06	0.00845872	0.0255697	0.740788	0.00250417	20.8218
Female infertility	Holdemania	rs12701617	A	G	-0.0660617	0.0149427	9.52e-06	0.0304285	0.015158	0.0447054	0.00214183	19.541
Female infertility	Holdemanella	rs607782	T	C	-0.0854214	0.0172515	7.19e-07	-0.01414	0.0157247	0.368536	0.00327754	24.5111
Female infertility	Holdemanella	rs73011279	T	C	-0.0961669	0.0199336	1.36e-06	-0.00869245	0.0181052	0.631151	0.00311185	23.2681
Female infertility	Holdemanella	rs75764681	T	C	-0.283103	0.0598999	1.94e-06	-0.007469	0.0370406	0.840195	0.0073835	22.3227
Female infertility	Holdemanella	rs4541991	T	C	-0.0927334	0.0194435	2.1e-06	0.0127479	0.0161297	0.429331	0.00296195	22.7411
Female infertility	Holdemanella	rs8113760	G	A	0.078999	0.01734	4.62e-06	-0.00895464	0.0164074	0.585224	0.00277606	20.7504
Female infertility	Holdemanella	rs12513188	G	A	0.0903906	0.0195276	4.65e-06	0.0110771	0.0170649	0.516265	0.00277492	21.4208
Female infertility	Holdemanella	rs34187114	C	A	-0.104505	0.022601	5.13e-06	0.00768257	0.0240468	0.749359	0.0027676	21.3752
Female infertility	Holdemanella	rs62113381	T	C	-0.105447	0.0232029	5.54e-06	0.019225	0.0223622	0.38995	0.00281736	20.6474
Female infertility	Holdemanella	rs35228298	G	A	0.0934832	0.0202886	7.3e-06	0.00350458	0.0207674	0.86599	0.00283938	21.225
Female infertility	Holdemanella	rs1926302	G	A	-0.107972	0.0231421	7.5e-06	0.0161783	0.0181087	0.371643	0.0028183	21.7622
Female infertility	Holdemanella	rs17586763	T	C	-0.227285	0.0510135	7.72e-06	0.0215939	0.0345598	0.532085	0.00517363	19.84
Female infertility	Haemophilus	rs9382510	C	T	-0.093521	0.0172649	7.12e-08	0.0311008	0.0175194	0.0758613	0.00320808	29.3358
Female infertility	Haemophilus	rs111582866	G	A	-0.124265	0.026016	1.27e-06	-0.0102233	0.0269867	0.704816	0.00271839	22.8095
Female infertility	Haemophilus	rs9328464	T	C	0.0723095	0.0148799	1.42e-06	0.000703575	0.0151694	0.963006	0.00258296	23.6098
Female infertility	Haemophilus	rs78909003	T	C	-0.246256	0.0503924	1.67e-06	0.00282295	0.0333886	0.932621	0.00666516	23.867
Female infertility	Haemophilus	rs76022354	C	T	0.244638	0.0505504	1.83e-06	0.00585902	0.0350682	0.867311	0.0064317	23.4076
Female infertility	Haemophilus	rs35509	G	A	0.128249	0.0268779	2.01e-06	0.0180856	0.0379427	0.633609	0.0026935	22.7622
Female infertility	Haemophilus	rs9895850	T	C	-0.192957	0.0416755	2.14e-06	-0.0134817	0.0370786	0.716158	0.00464659	21.4274
Female infertility	Haemophilus	rs4822728	T	C	0.0705861	0.0151388	3.48e-06	-0.0115269	0.015094	0.445064	0.00237835	21.7351
Female infertility	Haemophilus	rs10781340	G	A	0.0948915	0.0203221	4.32e-06	-0.016746	0.0231354	0.469172	0.00240684	21.7983
Female infertility	Gordonibacter	rs7294633	C	T	0.12867	0.0249946	3.44e-07	-0.00726093	0.0170293	0.669832	0.00706786	26.4867
Female infertility	Gordonibacter	rs72714787	C	A	0.181405	0.0377102	1.43e-06	0.0197182	0.0222765	0.376073	0.00617727	23.1285
Female infertility	Gordonibacter	rs322296	G	A	0.17869	0.037722	4.02e-06	-0.012745	0.028961	0.659883	0.0062031	22.4268
Female infertility	Gordonibacter	rs16955299	G	A	-0.196423	0.0433538	6.37e-06	0.0292688	0.0253071	0.247458	0.00571387	20.5157
Female infertility	Gordonibacter	rs3765837	T	G	-0.190729	0.0433608	7.17e-06	0.00544294	0.0292641	0.85245	0.0054115	19.3371
Female infertility	Gordonibacter	rs768830	G	A	0.149852	0.0333315	7.76e-06	0.0137751	0.020891	0.509651	0.00539976	20.2016
Female infertility	Gordonibacter	rs72939513	A	G	-0.21399	0.0490592	7.98e-06	-0.0209868	0.034597	0.54411	0.00550832	19.0148
Female infertility	Gordonibacter	rs35042269	C	A	-0.180293	0.0403296	8.11e-06	0.00137776	0.0239989	0.954219	0.00552842	19.974
Female infertility	Gordonibacter	rs13412653	A	C	0.107597	0.0239228	8.61e-06	0.00240889	0.0155927	0.877225	0.00540424	20.2184
Female infertility	Gordonibacter	rs4596722	A	G	0.102908	0.0231571	9.06e-06	0.00383673	0.015129	0.799804	0.00527645	19.7378
Female infertility	Fusicatenibacter	rs4378146	A	C	-0.0616691	0.0125259	7.2e-07	0.0228322	0.0173436	0.188019	0.0013924	24.2364
Female infertility	Fusicatenibacter	rs704418	T	C	0.0739124	0.0151073	7.77e-07	-0.0169	0.023078	0.463987	0.00143764	23.9337
Female infertility	Fusicatenibacter	rs2132128	G	A	-0.0771914	0.0160344	1.08e-06	0.0312938	0.0253319	0.216699	0.00133245	23.1729
Female infertility	Fusicatenibacter	rs62353480	A	G	-0.0701397	0.0145589	1.57e-06	-0.0165859	0.0202323	0.412344	0.00143783	23.2069
Female infertility	Fusicatenibacter	rs2025938	G	A	-0.0967298	0.0205426	2.99e-06	0.0087017	0.0307091	0.776902	0.00141693	22.1695
Female infertility	Fusicatenibacter	rs3303	T	C	-0.0953657	0.020407	3.94e-06	0.00221646	0.0310021	0.943005	0.00129232	21.8361
Female infertility	Fusicatenibacter	rs62187631	T	C	-0.0710571	0.015924	4.55e-06	-0.0300567	0.0192503	0.118439	0.00120372	19.9094
Female infertility	Fusicatenibacter	rs8063430	T	C	-0.104026	0.022217	4.93e-06	-0.0246479	0.0346883	0.47736	0.00140773	21.9211
Female infertility	Fusicatenibacter	rs1864685	A	C	-0.0494799	0.0108105	4.96e-06	0.016072	0.0153925	0.296419	0.00120433	20.9468
Female infertility	Fusicatenibacter	rs60254196	A	G	-0.0492427	0.0109365	5.47e-06	0.0267235	0.0151871	0.078473	0.00119268	20.2711
Female infertility	Fusicatenibacter	rs167879	C	T	-0.0659543	0.0148763	5.87e-06	0.0489662	0.0213273	0.021679	0.00118685	19.6538
Female infertility	Fusicatenibacter	rs6515626	G	A	0.141575	0.0313559	7.29e-06	0.0214262	0.0301718	0.477617	0.00260813	20.3809
Female infertility	Fusicatenibacter	rs9905659	G	A	-0.061617	0.0136576	7.31e-06	-0.00261969	0.0194752	0.892996	0.00116949	20.3518
Female infertility	Fusicatenibacter	rs10439674	A	G	-0.0572129	0.0130007	7.68e-06	0.0178407	0.0187782	0.342076	0.00111301	19.3645
Female infertility	Fusicatenibacter	rs8028026	A	G	-0.0792146	0.0180505	8.06e-06	-0.0203576	0.0262946	0.438804	0.0011643	19.2566
Female infertility	Fusicatenibacter	rs73103914	A	G	-0.0597324	0.0134458	8.3e-06	-0.0295028	0.0211483	0.163002	0.00113398	19.7333
Female infertility	Fusicatenibacter	rs792108	T	C	-0.0508345	0.0113843	8.5e-06	0.0105803	0.015332	0.490144	0.00117302	19.9366
Female infertility	Fusicatenibacter	rs206581	A	G	-0.0568339	0.0127894	8.96e-06	0.0124751	0.0183925	0.497598	0.00113467	19.7453
Female infertility	Flavonifractor	rs12030302	A	G	-0.0692276	0.0137467	5.61e-07	0.00486193	0.0151553	0.748356	0.00234163	25.356
Female infertility	Flavonifractor	rs806808	T	C	0.0667272	0.0136557	1.18e-06	0.0151008	0.0153034	0.323758	0.00220573	23.8723
Female infertility	Flavonifractor	rs34066017	A	G	0.0764294	0.0159789	1.52e-06	-0.00829746	0.0187434	0.657991	0.00213261	22.8741
Female infertility	Flavonifractor	rs11811696	T	C	-0.116063	0.0241012	2.07e-06	-0.00137714	0.0274782	0.960029	0.00226377	23.1859
Female infertility	Flavonifractor	rs114873521	C	T	-0.130067	0.0294087	7.13e-06	0.0171672	0.0293684	0.558851	0.00213181	19.5563
Female infertility	FamilyXIIIUCG001	rs12049454	T	C	-0.0647298	0.0134065	1.17e-06	0.0243126	0.0155058	0.116888	0.00182532	23.3081
Female infertility	FamilyXIIIUCG001	rs1426266	T	C	-0.0665521	0.0137151	1.25e-06	0.00782296	0.0170198	0.645776	0.00184324	23.5429
Female infertility	FamilyXIIIUCG001	rs7119679	G	A	-0.0809085	0.0174782	3.52e-06	-0.0021247	0.017722	0.90457	0.00171891	21.4252
Female infertility	FamilyXIIIUCG001	rs76463770	A	G	0.19313	0.0419866	3.77e-06	-0.000839937	0.0445194	0.984947	0.00373017	21.1506
Female infertility	FamilyXIIIUCG001	rs62414802	C	T	-0.0611904	0.013457	4.29e-06	-0.0244136	0.0173567	0.159552	0.00161904	20.673
Female infertility	FamilyXIIIUCG001	rs3842897	G	A	-0.112639	0.0242751	5.2e-06	0.0125265	0.0265753	0.637385	0.00173236	21.5272
Female infertility	FamilyXIIIUCG001	rs112362903	A	G	-0.149047	0.0333271	7.88e-06	-0.0588459	0.0439703	0.180795	0.00232596	19.9963
Female infertility	FamilyXIIIUCG001	rs8076666	A	G	0.088655	0.0198094	8.02e-06	-0.0220309	0.0231975	0.342258	0.00163037	20.0259
Female infertility	FamilyXIIIAD3011group	rs62200412	C	T	-0.0800851	0.0163834	5.8e-07	0.00839801	0.0173367	0.628097	0.00174603	23.8908
Female infertility	FamilyXIIIAD3011group	rs16840310	A	G	-0.0608052	0.0122149	6.75e-07	0.0100907	0.0153261	0.510283	0.00174191	24.7765
Female infertility	FamilyXIIIAD3011group	rs72730932	C	A	-0.0899559	0.0177107	6.89e-07	-0.000736958	0.0262561	0.977608	0.00196516	25.7943
Female infertility	FamilyXIIIAD3011group	rs12812672	T	C	-0.096065	0.020828	2.56e-06	0.0293157	0.0292627	0.316435	0.00156579	21.2701
Female infertility	FamilyXIIIAD3011group	rs62029761	A	G	0.128753	0.0276002	3.89e-06	-0.106223	0.0342801	0.00194393	0.00224885	21.757
Female infertility	FamilyXIIIAD3011group	rs16940167	C	T	0.0732552	0.0159898	3.91e-06	0.0181744	0.0192139	0.344201	0.00147581	20.986
Female infertility	FamilyXIIIAD3011group	rs17156849	G	A	-0.112891	0.0245292	4.19e-06	0.0219742	0.0323212	0.496588	0.00158385	21.178
Female infertility	FamilyXIIIAD3011group	rs11126423	C	T	0.0904399	0.0196301	5.91e-06	-0.0441477	0.0268261	0.0998252	0.00154303	21.2232
Female infertility	FamilyXIIIAD3011group	rs149302	T	C	-0.0645635	0.0143225	7.48e-06	0.0247947	0.0179051	0.166117	0.00142979	20.3178
Female infertility	FamilyXIIIAD3011group	rs739451	C	T	0.0649589	0.0147534	7.88e-06	-0.0104992	0.0186223	0.572892	0.00136365	19.3834
Female infertility	FamilyXIIIAD3011group	rs9837139	A	G	0.10752	0.0240482	8.71e-06	-0.00559399	0.0271802	0.836939	0.00147562	19.9872
Female infertility	FamilyXIIIAD3011group	rs9276029	A	G	-0.0811384	0.0185669	8.93e-06	0.00544859	0.019051	0.774877	0.00140577	19.0947
Female infertility	FamilyXIIIAD3011group	rs11736617	G	A	-0.0759493	0.0172101	9.02e-06	0.0280455	0.0333881	0.400917	0.00141151	19.4724
Female infertility	Escherichia.Shigella	rs73208162	A	G	-0.119296	0.024839	2.19e-06	-0.0390424	0.0428488	0.362207	0.0020788	23.0623
Female infertility	Escherichia.Shigella	rs1154904	A	G	-0.0613376	0.0130644	3.04e-06	-0.0232512	0.0150919	0.123404	0.00183325	22.0395
Female infertility	Escherichia.Shigella	rs113127095	A	G	0.151009	0.0323434	3.33e-06	-0.0371501	0.0378401	0.326215	0.00257829	21.7938
Female infertility	Escherichia.Shigella	rs113513883	A	G	0.172283	0.038041	5.28e-06	-0.0326318	0.0433373	0.451467	0.00325541	20.5042
Female infertility	Escherichia.Shigella	rs4731451	G	A	-0.0609885	0.0135157	7.47e-06	0.00971113	0.0162179	0.549312	0.00169381	20.3585
Female infertility	Escherichia.Shigella	rs118526	C	A	-0.0594401	0.013598	8e-06	-0.00361281	0.0165806	0.827512	0.00160946	19.1045
Female infertility	Escherichia.Shigella	rs112767262	T	C	0.0732963	0.0163589	8.21e-06	-0.017457	0.0181608	0.336426	0.00170257	20.0717
Female infertility	Escherichia.Shigella	rs2798105	A	G	-0.100851	0.0222045	8.25e-06	0.0101203	0.0251963	0.687934	0.00182289	20.6253
Female infertility	Escherichia.Shigella	rs57024273	T	C	0.0626172	0.0139919	9.7e-06	0.0264626	0.0173929	0.128144	0.00168684	20.0246
Female infertility	ErysipelotrichaceaeUCG003	rs76502207	T	C	0.144844	0.0289929	6.41e-07	-0.0066965	0.038312	0.861246	0.00231848	24.9537
Female infertility	ErysipelotrichaceaeUCG003	rs28568391	A	G	-0.0583911	0.0118741	6.42e-07	-0.0125809	0.0152186	0.408417	0.00165993	24.1788
Female infertility	ErysipelotrichaceaeUCG003	rs10164067	T	G	-0.10326	0.0212405	1.13e-06	0.0450695	0.03425	0.188208	0.00163549	23.6306
Female infertility	ErysipelotrichaceaeUCG003	rs11994308	C	T	0.115417	0.0242503	1.33e-06	-0.0462773	0.0264517	0.0802029	0.00166797	22.6488
Female infertility	ErysipelotrichaceaeUCG003	rs59068084	T	G	0.0564772	0.0120224	3.12e-06	-0.0165593	0.0155994	0.288446	0.00151504	22.0651
Female infertility	ErysipelotrichaceaeUCG003	rs17798136	G	A	0.158818	0.0347674	3.24e-06	-0.0304989	0.0306469	0.319655	0.00280395	20.861
Female infertility	ErysipelotrichaceaeUCG003	rs62403464	T	C	-0.0731743	0.0156516	3.44e-06	-0.0024163	0.0196133	0.901952	0.0014649	21.8546
Female infertility	ErysipelotrichaceaeUCG003	rs75949021	T	C	-0.169667	0.0374238	3.58e-06	-0.0225159	0.0383473	0.557099	0.00304887	20.548
Female infertility	ErysipelotrichaceaeUCG003	rs59104037	A	G	-0.0951263	0.0204742	4.48e-06	-0.00373063	0.0224986	0.868301	0.00145174	21.5838
Female infertility	ErysipelotrichaceaeUCG003	rs8053479	A	G	-0.0838212	0.0186509	5.83e-06	-0.0261849	0.0237578	0.270391	0.00146011	20.195
Female infertility	ErysipelotrichaceaeUCG003	rs4758231	G	T	-0.0551754	0.0122047	6.55e-06	0.00219191	0.0168492	0.896496	0.00137072	20.4353
Female infertility	ErysipelotrichaceaeUCG003	rs6875357	C	T	0.165673	0.0353831	6.7e-06	-0.0416822	0.0390927	0.286315	0.00310713	21.9175
Female infertility	ErysipelotrichaceaeUCG003	rs11666127	A	G	-0.0719187	0.0161371	7.9e-06	0.0331869	0.0198957	0.0953059	0.0014359	19.8597
Female infertility	ErysipelotrichaceaeUCG003	rs74988980	G	A	-0.133141	0.0348574	8.64e-06	-0.0303253	0.0374817	0.418476	0.00244845	14.5844
Female infertility	ErysipelotrichaceaeUCG003	rs12251396	A	G	-0.0705399	0.0158766	9.52e-06	0.0313399	0.0209845	0.135311	0.00138716	19.7376
Female infertility	ErysipelotrichaceaeUCG003	rs73074432	C	T	0.072154	0.0164378	9.99e-06	-0.0309937	0.0243634	0.203321	0.00135344	19.2652
Female infertility	Erysipelatoclostridium	rs7221249	A	G	0.0839861	0.0142741	4.31e-09	0.00347192	0.0151622	0.81888	0.00352693	34.6119
Female infertility	Erysipelatoclostridium	rs710230	T	C	0.143381	0.0281514	6.33e-07	-0.0155317	0.0291838	0.594585	0.00286895	25.9352
Female infertility	Erysipelatoclostridium	rs4697572	A	G	-0.0810636	0.0163308	7.59e-07	-0.0065555	0.0190113	0.730229	0.00251333	24.6347
Female infertility	Erysipelatoclostridium	rs58236560	G	T	-0.111157	0.0234426	2.16e-06	-0.0131812	0.0231167	0.56854	0.00239428	22.4786
Female infertility	Erysipelatoclostridium	rs6474512	A	C	0.067015	0.0143201	3.02e-06	0.0113372	0.0155766	0.466712	0.0022336	21.8958
Female infertility	Erysipelatoclostridium	rs622418	A	G	-0.0668051	0.0143224	3.68e-06	-0.0171366	0.0151292	0.257346	0.00221895	21.7518
Female infertility	Erysipelatoclostridium	rs340991	A	G	-0.0740482	0.0158891	3.75e-06	-0.0247495	0.0170797	0.147319	0.00221555	21.714
Female infertility	Erysipelatoclostridium	rs17804233	T	C	-0.0662914	0.0144203	4.59e-06	-0.00312103	0.0151281	0.836552	0.00215554	21.1289
Female infertility	Erysipelatoclostridium	rs16936671	C	T	-0.0968026	0.0217883	6.04e-06	0.00882299	0.0217899	0.685542	0.00207611	19.735
Female infertility	Erysipelatoclostridium	rs9590927	G	A	-0.0646003	0.0143479	6.39e-06	-0.0189048	0.0151259	0.211364	0.00206806	20.2675
Female infertility	Erysipelatoclostridium	rs1434153	G	A	-0.0684526	0.0152443	6.85e-06	0.00689701	0.0152841	0.651805	0.00208253	20.1593
Female infertility	Erysipelatoclostridium	rs45480394	T	G	-0.0687134	0.0151835	7.66e-06	0.00161625	0.0157112	0.918064	0.00212794	20.4761
Female infertility	Erysipelatoclostridium	rs2901723	C	A	0.0641339	0.0144295	8.79e-06	0.00330267	0.015335	0.82948	0.00204043	19.7508
Female infertility	Erysipelatoclostridium	rs61806970	C	T	0.142548	0.0320688	9.09e-06	-0.0157358	0.0300107	0.600042	0.00228061	19.754
Female infertility	Erysipelatoclostridium	rs3804326	A	G	0.14147	0.0336352	9.85e-06	0.0333784	0.0352238	0.343329	0.00251083	17.6855
Female infertility	Enterorhabdus	rs114731706	T	G	0.182308	0.0382298	2.17e-06	0.0146562	0.0428317	0.732216	0.00380363	22.7333
Female infertility	Enterorhabdus	rs3017103	A	G	0.0980897	0.0208995	2.94e-06	0.0237568	0.0192592	0.217378	0.00291916	22.0222
Female infertility	Enterorhabdus	rs73331712	T	C	0.26199	0.055123	4.85e-06	-0.0526546	0.0378655	0.164357	0.00721335	22.5747
Female infertility	Enterorhabdus	rs77655283	G	A	0.132988	0.0298306	5.88e-06	0.020745	0.0293606	0.47984	0.00264506	19.8694
Female infertility	Enterorhabdus	rs10098492	T	C	0.132323	0.0293688	6.41e-06	-0.0272178	0.0325866	0.403579	0.00275021	20.2946
Female infertility	Enterorhabdus	rs2051957	C	T	0.0843291	0.0189864	8.9e-06	0.0339204	0.0189529	0.0734988	0.00261507	19.7221
Female infertility	Eisenbergiella	rs2683098	C	T	0.107319	0.022515	2.24e-06	-0.0219664	0.01844	0.233559	0.00405372	22.7118
Female infertility	Eisenbergiella	rs3812426	G	A	0.106447	0.0224159	2.72e-06	0.0342377	0.0208934	0.101279	0.0040229	22.5425
Female infertility	Eisenbergiella	rs1508033	A	C	0.091546	0.0195787	3.23e-06	0.000673945	0.0164211	0.967263	0.00390284	21.8553
Female infertility	Eisenbergiella	rs4462860	G	A	0.0939071	0.0201104	4.16e-06	-0.00204728	0.0155572	0.895303	0.00397769	21.7969
Female infertility	Eisenbergiella	rs11027642	C	T	0.129006	0.0284844	4.92e-06	0.0219926	0.021648	0.309669	0.00366052	20.5044
Female infertility	Eisenbergiella	rs1553971	T	G	0.120965	0.0263054	5.27e-06	-0.0389709	0.0181737	0.0320044	0.00377325	21.1383
Female infertility	Eisenbergiella	rs11079158	T	C	0.100627	0.022546	7.35e-06	0.0143326	0.018318	0.43396	0.0035559	19.9128
Female infertility	Eisenbergiella	rs13258851	A	G	0.137001	0.0302124	7.75e-06	0.00245612	0.0216601	0.909719	0.00366957	20.5553
Female infertility	Eisenbergiella	rs11938607	T	C	0.0978125	0.0216636	8.22e-06	-0.000151841	0.0173083	0.993	0.00363813	20.3786
Female infertility	Eisenbergiella	rs12257723	A	C	-0.0952742	0.0211569	8.85e-06	-0.00294394	0.0161171	0.855065	0.00361978	20.2717
Female infertility	Eisenbergiella	rs12710729	C	A	0.0893384	0.0199069	9.84e-06	0.00984399	0.0162127	0.543733	0.00359448	20.1332
Female infertility	Eggerthella	rs2240838	A	G	0.0980582	0.0197653	7.36e-07	-0.0283386	0.015319	0.064328	0.00475922	24.6033
Female infertility	Eggerthella	rs112205261	T	C	-0.188618	0.0403613	3.35e-06	-0.0317455	0.0279132	0.255416	0.00431788	21.8305
Female infertility	Eggerthella	rs2223081	G	A	0.102572	0.0221108	3.89e-06	-0.0185011	0.0168548	0.272347	0.00416372	21.5119
Female infertility	Eggerthella	rs3851328	T	G	-0.107774	0.0236527	4.18e-06	-0.00454235	0.0182472	0.803412	0.0040176	20.754
Female infertility	Eggerthella	rs76663501	C	T	0.175349	0.0378576	4.83e-06	-0.0458541	0.0341271	0.179069	0.00443674	21.4448
Female infertility	Eggerthella	rs1784446	G	A	0.0907728	0.0198096	5.23e-06	-0.0112646	0.0150844	0.455202	0.00406292	20.989
Female infertility	Eggerthella	rs4985746	G	A	0.110522	0.0247653	5.71e-06	-0.0533445	0.025249	0.0346234	0.00404322	19.9084
Female infertility	Eggerthella	rs13070736	A	C	-0.121331	0.0272024	7.62e-06	-0.00181665	0.0202798	0.928621	0.00385035	19.8866
Female infertility	Eggerthella	rs6430926	C	T	0.0879736	0.0197127	8.37e-06	0.000115657	0.0152481	0.993948	0.0038546	19.9087
Female infertility	Eggerthella	rs67490567	T	C	0.108495	0.0245457	8.94e-06	0.00846416	0.017472	0.628073	0.00382895	19.5297
Female infertility	Dorea	rs62503162	A	G	-0.0974091	0.0194379	7.47e-07	0.0143378	0.0373402	0.700995	0.00154684	25.11
Female infertility	Dorea	rs13279148	G	A	0.0715309	0.0150878	2.25e-06	0.0465419	0.0244374	0.0568408	0.00127511	22.4744
Female infertility	Dorea	rs73729431	C	T	-0.13745	0.0299983	3.17e-06	-0.1611	0.0548177	0.00329458	0.00218302	20.9897
Female infertility	Dorea	rs4793307	C	T	0.0574165	0.0122472	4.01e-06	-0.0146945	0.0178445	0.410236	0.00124723	21.9762
Female infertility	Dorea	rs1899291	C	T	0.0697217	0.0150285	4.57e-06	0.00752505	0.0208	0.717515	0.00122079	21.5208
Female infertility	Dorea	rs3005511	A	G	0.0516127	0.0112852	5.29e-06	-0.0321174	0.0164662	0.0511164	0.00118636	20.9143
Female infertility	Dorea	rs11150408	T	G	0.0488254	0.0109063	7.06e-06	-0.000417873	0.0151582	0.978007	0.00116284	20.0393
Female infertility	Dorea	rs3752849	G	A	0.163846	0.036608	7.68e-06	0.0160754	0.0350102	0.646118	0.00374984	20.0242
Female infertility	Dorea	rs345219	T	G	-0.0497368	0.0112621	8.8e-06	-0.0257119	0.0152668	0.0921489	0.00113167	19.5015
Female infertility	Dorea	rs12537781	T	C	-0.055544	0.0125223	9.15e-06	-0.0196633	0.0176744	0.265911	0.00111612	19.6724
Female infertility	Dialister	rs11166701	G	A	-0.0655301	0.013186	5.51e-07	-0.00599251	0.015162	0.692673	0.00210288	24.6934
Female infertility	Dialister	rs4753063	G	A	-0.0596297	0.0130052	4.86e-06	0.00843562	0.0151519	0.577707	0.00175044	21.0194
Female infertility	Dialister	rs4747450	C	A	0.0668509	0.0147685	5.84e-06	-0.0103509	0.0181682	0.568865	0.00170642	20.4864
Female infertility	Dialister	rs11071887	T	C	0.0662403	0.0146315	5.91e-06	0.0210413	0.0161984	0.193954	0.00170664	20.4925
Female infertility	Dialister	rs2435610	A	C	0.0647131	0.0143314	5.93e-06	0.00834956	0.0174803	0.632895	0.0016985	20.3861
Female infertility	Dialister	rs10938938	G	A	-0.0773514	0.0170915	7.37e-06	0.00365112	0.0208529	0.861009	0.00179331	20.4786
Female infertility	Dialister	rs10138457	T	C	-0.113054	0.0261933	7.88e-06	0.0399141	0.0259828	0.124496	0.00169561	18.6257
Female infertility	Dialister	rs2314294	T	C	0.0865932	0.0193719	8.08e-06	0.0405429	0.0220886	0.0664355	0.00175907	19.9778
Female infertility	Dialister	rs76680460	G	A	-0.161296	0.0364332	8.19e-06	0.023274	0.0376912	0.536912	0.00272387	19.5944
Female infertility	Dialister	rs75416973	A	G	0.0727223	0.016451	9.46e-06	0.0230366	0.0182552	0.206979	0.00171091	19.5378
Female infertility	Dialister	rs764177	C	A	-0.0601454	0.0135366	9.61e-06	0.00732138	0.0157242	0.641492	0.00164409	19.7385
Female infertility	DefluviitaleaceaeUCG011	rs72731813	C	T	-0.147383	0.0293796	4.33e-07	-0.0233942	0.0354997	0.509898	0.00322957	25.1588
Female infertility	DefluviitaleaceaeUCG011	rs4677103	A	G	0.0977912	0.0197263	9.6e-07	0.0156114	0.0200841	0.43698	0.00306906	24.5696
Female infertility	DefluviitaleaceaeUCG011	rs112893842	T	C	0.11381	0.0232806	1.45e-06	0.00644089	0.0265463	0.808293	0.00291203	23.8929
Female infertility	DefluviitaleaceaeUCG011	rs1582238	T	C	0.0805036	0.0167257	1.57e-06	-0.0134289	0.0158183	0.39591	0.0028936	23.1609
Female infertility	DefluviitaleaceaeUCG011	rs55658617	T	C	0.174369	0.0362226	2.15e-06	0.0194072	0.0412451	0.637974	0.00346579	23.1659
Female infertility	DefluviitaleaceaeUCG011	rs9608282	T	G	0.142939	0.0299793	2.52e-06	-0.035428	0.0420576	0.399582	0.00293758	22.7273
Female infertility	DefluviitaleaceaeUCG011	rs9725395	A	G	-0.13834	0.029554	3.52e-06	0.0091134	0.0238313	0.702155	0.00272765	21.9055
Female infertility	DefluviitaleaceaeUCG011	rs4344384	G	T	0.0715978	0.0156309	4.83e-06	-0.0217295	0.0151598	0.151755	0.00255838	20.9761
Female infertility	DefluviitaleaceaeUCG011	rs2892880	G	A	0.0817755	0.0181686	6.83e-06	-0.0339826	0.0174069	0.0509073	0.00246984	20.2533
Female infertility	Coprococcus3	rs8100692	T	C	0.0577411	0.0113476	4.16e-07	0.000580311	0.0151559	0.969457	0.00163305	25.8885
Female infertility	Coprococcus3	rs178271	T	C	0.145257	0.0294239	7.81e-07	0.0334469	0.0596862	0.57522	0.00225275	24.3665
Female infertility	Coprococcus3	rs13394391	C	T	-0.0709302	0.0150918	2.2e-06	-0.00365541	0.0209144	0.861253	0.00139311	22.0864
Female infertility	Coprococcus3	rs7521171	G	A	-0.0596434	0.0129279	4.32e-06	0.000434529	0.0163447	0.97879	0.00137382	21.2822
Female infertility	Coprococcus3	rs11080344	C	T	0.0516921	0.0113054	4.79e-06	0.0115429	0.01518	0.447015	0.00131851	20.9036
Female infertility	Coprococcus3	rs4575475	G	A	0.0619514	0.0137787	7.04e-06	-0.0411168	0.0180239	0.0225341	0.00133223	20.2128
Female infertility	Coprococcus3	rs13247359	G	A	0.051211	0.0113031	7.33e-06	-0.00928817	0.0152525	0.542552	0.00129481	20.5247
Female infertility	Coprococcus3	rs10810043	A	G	0.0515518	0.0115923	9.27e-06	-0.0173378	0.0161327	0.28251	0.00124751	19.7739
Female infertility	Coprococcus3	rs11077359	T	C	-0.0645443	0.0148833	9.64e-06	0.0192608	0.0202653	0.34189	0.00122148	18.8044
Female infertility	Coprococcus1	rs4277593	G	A	-0.0585649	0.0109914	1.14e-07	0.00493092	0.0153718	0.74838	0.00170213	28.387
Female infertility	Coprococcus1	rs74101919	T	C	-0.0718989	0.0144651	1.03e-06	-0.0107964	0.0244842	0.659245	0.00147439	24.7029
Female infertility	Coprococcus1	rs56405618	A	G	-0.08963	0.0186508	1.57e-06	0.0108951	0.0235989	0.644313	0.00140803	23.0918
Female infertility	Coprococcus1	rs1010560	C	A	0.0580232	0.0122722	1.96e-06	0.00968577	0.017126	0.571693	0.00133496	22.3517
Female infertility	Coprococcus1	rs73031725	T	C	0.167591	0.0355224	1.98e-06	0.0748837	0.0436107	0.0859607	0.00307938	22.2524
Female infertility	Coprococcus1	rs1576241	A	G	-0.0510343	0.0109535	3.33e-06	0.00429889	0.0155897	0.782739	0.00129595	21.7056
Female infertility	Coprococcus1	rs12794898	G	T	0.0903299	0.0197212	4.92e-06	-0.00085755	0.0227267	0.969901	0.0013796	20.9767
Female infertility	Coprococcus1	rs2907920	A	G	0.0561173	0.0126824	7.65e-06	0.00759598	0.0168346	0.651835	0.00121915	19.5766
Female infertility	Coprococcus1	rs73167075	T	C	0.0573137	0.0127573	8.57e-06	0.0109847	0.0185482	0.553702	0.00120476	20.1812
Female infertility	Coprococcus1	rs946513	C	T	0.205899	0.0460018	8.62e-06	0.0354817	0.0366483	0.33296	0.00462666	20.0243
Female infertility	Coprococcus1	rs1519491	T	C	0.0499197	0.0113558	8.95e-06	-0.027395	0.0154548	0.0762974	0.00115355	19.3223
Female infertility	Coprobacter	rs305411	A	G	0.129218	0.0264518	1.01e-06	0.0525855	0.02525	0.0372881	0.00350893	23.8567
Female infertility	Coprobacter	rs213863	C	T	-0.0887412	0.0188377	2.35e-06	-0.00640454	0.0157566	0.6844	0.00325385	22.1853
Female infertility	Coprobacter	rs3828477	G	T	-0.091218	0.019569	2.89e-06	0.00111517	0.0158959	0.944071	0.00318606	21.7217
Female infertility	Coprobacter	rs143662916	C	T	0.253264	0.0540141	3.07e-06	-0.055567	0.0444351	0.21111	0.00708064	21.971
Female infertility	Coprobacter	rs72821405	T	C	-0.147365	0.0319978	4.76e-06	0.0425444	0.0267247	0.111396	0.00342203	21.2036
Female infertility	Coprobacter	rs11532348	C	T	-0.103931	0.0226826	5.71e-06	-0.045244	0.021355	0.0341193	0.00328806	20.9876
Female infertility	Coprobacter	rs74919520	G	A	0.125703	0.0276296	5.76e-06	0.0142497	0.0244088	0.559357	0.00323028	20.6922
Female infertility	Coprobacter	rs12684609	T	C	0.100827	0.0220366	6.1e-06	-0.014616	0.0190909	0.443913	0.00327873	20.9279
Female infertility	Coprobacter	rs189356	G	A	0.0781125	0.0171916	6.26e-06	0.0192026	0.0152826	0.208936	0.00304329	20.6385
Female infertility	Coprobacter	rs12996055	A	C	0.0921817	0.0209405	8.08e-06	-0.00822792	0.017194	0.632269	0.00294084	19.3724
Female infertility	Collinsella	rs9541268	C	A	0.09597	0.0197312	8.79e-07	-0.0291307	0.0263651	0.269204	0.00182855	23.6535
Female infertility	Collinsella	rs73052258	G	A	0.0930178	0.0202658	1.72e-06	0.00628723	0.0283578	0.824539	0.00146757	21.0641
Female infertility	Collinsella	rs2103510	G	A	0.0786551	0.0168217	2.42e-06	-0.0103374	0.0234958	0.659958	0.00152295	21.8602
Female infertility	Collinsella	rs75672793	A	G	-0.108908	0.0240522	6.14e-06	-0.0204965	0.0362643	0.571938	0.00162443	20.4995
Female infertility	Collinsella	rs10890671	T	C	-0.0537401	0.0118848	6.52e-06	-0.0339424	0.0152451	0.0259836	0.00142438	20.4433
Female infertility	Collinsella	rs1496626	T	C	-0.0722307	0.01616	6.78e-06	-0.00754108	0.0221692	0.733736	0.00139183	19.9755
Female infertility	Collinsella	rs62448871	C	A	-0.0540309	0.0120324	6.78e-06	-0.0158423	0.0152877	0.300073	0.00140476	20.1613
Female infertility	Collinsella	rs149807560	C	A	-0.104264	0.0235841	7.1e-06	0.0620572	0.0298744	0.0377764	0.00144857	19.5419
Female infertility	Collinsella	rs11597285	G	T	-0.0537947	0.0120548	9.38e-06	0.00207202	0.0154343	0.893206	0.00138734	19.911
Female infertility	Clostridiumsensustricto1	rs550843	T	C	-0.0783246	0.0169209	2.05e-06	-0.015081	0.016839	0.370467	0.00151708	21.4233
Female infertility	Clostridiumsensustricto1	rs2795528	G	A	-0.184315	0.0392204	2.72e-06	-0.0659917	0.0328903	0.0448116	0.0034572	22.078
Female infertility	Clostridiumsensustricto1	rs2817172	C	T	0.058139	0.0124492	2.77e-06	-0.0133699	0.0154577	0.387074	0.0015943	21.8065
Female infertility	Clostridiumsensustricto1	rs115807074	A	G	-0.22736	0.0492575	4.32e-06	-0.0589502	0.0745642	0.42918	0.00501259	21.295
Female infertility	Clostridiumsensustricto1	rs116847295	C	T	0.110021	0.0246032	4.58e-06	-0.0345807	0.0226422	0.126695	0.00154659	19.9943
Female infertility	Clostridiumsensustricto1	rs12341505	G	A	0.0810718	0.0180121	4.82e-06	-0.00982686	0.0260395	0.70589	0.00143289	20.2558
Female infertility	Clostridiumsensustricto1	rs11264403	G	A	-0.139062	0.0334454	7.76e-06	-0.0122125	0.0286902	0.670351	0.00236745	17.2831
Female infertility	ChristensenellaceaeR	rs62467127	C	T	0.114108	0.0251983	3.25e-06	0.0591318	0.0483422	0.221257	0.00160968	20.5033
Female infertility	ChristensenellaceaeR	rs17081797	A	G	-0.0904325	0.0204253	3.34e-06	0.00938011	0.0309048	0.761497	0.0011994	19.6001
Female infertility	ChristensenellaceaeR	rs892686	A	G	0.0514099	0.011136	3.97e-06	0.0290093	0.0151136	0.0549326	0.00130382	21.31
Female infertility	ChristensenellaceaeR	rs78521377	C	T	0.124992	0.0274797	5.61e-06	-0.0137048	0.0438769	0.754778	0.00163864	20.6857
Female infertility	ChristensenellaceaeR	rs62132810	A	G	-0.0828853	0.0179623	5.67e-06	-0.040006	0.0218209	0.0667452	0.00141131	21.29
Female infertility	ChristensenellaceaeR	rs10461257	A	G	-0.0551969	0.0122069	6.51e-06	0.019513	0.0161004	0.225531	0.00127731	20.4439
Female infertility	ChristensenellaceaeR	rs73952017	C	T	-0.0862164	0.0194354	8.46e-06	-0.00732684	0.0248846	0.768428	0.00128671	19.676
Female infertility	ChristensenellaceaeR	rs62190261	A	C	0.0958394	0.0214723	8.74e-06	-0.0226358	0.0269067	0.400197	0.00130261	19.9193
Female infertility	Catenibacterium	rs12404911	C	T	0.140717	0.0304142	2.8e-06	0.00115988	0.0194318	0.952403	0.00656552	21.3931
Female infertility	Catenibacterium	rs212393	G	A	-0.135254	0.0286209	3.62e-06	0.0198702	0.0186213	0.285939	0.0068476	22.3185
Female infertility	Catenibacterium	rs73128290	A	G	0.129726	0.0284563	4.29e-06	-0.0107866	0.0164611	0.512289	0.00637546	20.7698
Female infertility	Catenibacterium	rs7742829	C	T	0.11411	0.0251099	5.61e-06	-0.00279297	0.0152016	0.854226	0.0063356	20.6391
Female infertility	Butyrivibrio	rs7752361	A	G	-0.11923	0.0239975	7.69e-07	-0.000935986	0.0151672	0.950793	0.00704156	24.6713
Female infertility	Butyrivibrio	rs72723662	C	T	0.224078	0.0449336	7.86e-07	0.00862582	0.0223193	0.699146	0.00802773	24.8527
Female infertility	Butyrivibrio	rs16941336	C	T	0.127488	0.0267936	1.53e-06	0.0274185	0.0180209	0.128139	0.00645996	22.6268
Female infertility	Butyrivibrio	rs4537857	T	C	-0.12459	0.0260992	1.8e-06	0.0156416	0.0159844	0.327802	0.00650203	22.7752
Female infertility	Butyrivibrio	rs11761679	T	C	0.154775	0.0321539	2.2e-06	0.0218317	0.0219054	0.318941	0.00661038	23.1572
Female infertility	Butyrivibrio	rs74622183	A	G	-0.201027	0.0428204	2.46e-06	0.0043862	0.0264372	0.868227	0.00629702	22.0272
Female infertility	Butyrivibrio	rs7763512	G	A	0.119846	0.0253367	3.11e-06	0.00369524	0.0152639	0.80871	0.0068185	22.3603
Female infertility	Butyrivibrio	rs17163238	G	A	0.140987	0.0309117	5.51e-06	0.026941	0.0191024	0.158438	0.00593876	20.7904
Female infertility	Butyrivibrio	rs9349693	A	G	0.117973	0.0259861	5.55e-06	-0.0319985	0.0166361	0.0544252	0.00588424	20.5984
Female infertility	Butyrivibrio	rs486484	A	G	-0.108349	0.0240008	6.61e-06	0.00343443	0.0153332	0.822768	0.00586231	20.3678
Female infertility	Butyrivibrio	rs77356209	T	C	0.216874	0.0483299	6.66e-06	-0.0314581	0.0362161	0.385054	0.00592401	20.1246
Female infertility	Butyrivibrio	rs142855850	A	G	0.205013	0.0457138	6.86e-06	0.0186837	0.0254375	0.462647	0.00618069	20.1002
Female infertility	Butyrivibrio	rs1007475	G	T	0.118065	0.0261271	7.92e-06	-0.0120447	0.0169859	0.478262	0.00583036	20.4086
Female infertility	Butyrivibrio	rs4928024	A	G	-0.17471	0.0389333	8.19e-06	-0.0112353	0.0194508	0.563518	0.00575155	20.1254
Female infertility	Butyrivibrio	rs16934069	T	C	-0.133784	0.0299444	8.86e-06	-0.0281621	0.0200479	0.160097	0.00569991	19.9494
Female infertility	Butyricimonas	rs113054641	G	A	-0.144881	0.0274574	1.74e-07	0.0721138	0.036677	0.0492765	0.00279069	27.8367
Female infertility	Butyricimonas	rs62390301	T	C	-0.0872983	0.0174893	7.42e-07	0.00634913	0.019003	0.738295	0.00233752	24.9107
Female infertility	Butyricimonas	rs7083431	A	C	0.0703539	0.0144439	8.85e-07	-0.01755	0.0170657	0.303771	0.0022048	23.7208
Female infertility	Butyricimonas	rs62130338	G	A	-0.0732608	0.0158324	3.9e-06	0.00114092	0.0159717	0.943053	0.00202409	21.4076
Female infertility	Butyricimonas	rs78453362	A	G	-0.14948	0.0327073	4.06e-06	-0.00353952	0.048271	0.941547	0.00253858	20.882
Female infertility	Butyricimonas	rs9657374	C	T	0.0680719	0.0148172	4.5e-06	0.0148592	0.0165588	0.369526	0.00196185	21.1018
Female infertility	Butyricimonas	rs1862649	G	A	0.113124	0.0248176	4.76e-06	-0.0032285	0.0299858	0.914259	0.00204828	20.7732
Female infertility	Butyricimonas	rs71428626	G	T	-0.133188	0.0289905	4.8e-06	-0.00157083	0.042966	0.970836	0.00215438	21.1024
Female infertility	Butyricimonas	rs12458763	A	C	0.122037	0.0269587	6.37e-06	-0.0227404	0.0363493	0.531572	0.00196972	20.488
Female infertility	Butyricimonas	rs11228830	A	G	0.135265	0.0298411	6.55e-06	0.0137381	0.0269658	0.610427	0.00228434	20.542
Female infertility	Butyricimonas	rs12304031	G	A	-0.086278	0.0196846	6.7e-06	-0.00611713	0.0230608	0.79081	0.00179924	19.2072
Female infertility	Butyricimonas	rs2114713	G	T	0.062721	0.0138998	6.88e-06	-0.0444029	0.0151709	0.00342421	0.00189333	20.3577
Female infertility	Butyricimonas	rs72814525	A	G	0.0664154	0.0149766	8.25e-06	0.00845495	0.017678	0.632456	0.0018284	19.662
Female infertility	Butyricicoccus	rs56221232	T	C	0.0828027	0.0167401	7.62e-07	-0.0242943	0.0251283	0.333639	0.00142601	24.4638
Female infertility	Butyricicoccus	rs2017189	G	T	-0.0506956	0.011024	3.87e-06	-0.00705587	0.0151718	0.641885	0.0012328	21.1451
Female infertility	Butyricicoccus	rs7322368	T	C	0.0815733	0.0183167	5.52e-06	-0.0250704	0.0263593	0.341553	0.00115623	19.8314
Female infertility	Butyricicoccus	rs12585793	T	C	-0.262206	0.0564729	5.79e-06	-0.0208645	0.0452379	0.644643	0.00682955	21.5441
Female infertility	Butyricicoccus	rs62478070	T	G	0.224039	0.0494959	5.94e-06	-0.00344323	0.0483479	0.943224	0.00508716	20.4782
Female infertility	Butyricicoccus	rs4962426	G	T	0.0614216	0.0135979	7.38e-06	0.0196084	0.0191178	0.305049	0.00120662	20.4007
Female infertility	Butyricicoccus	rs10084203	A	G	0.0549699	0.0123563	8.59e-06	-0.0211605	0.02253	0.347621	0.00115369	19.789
Female infertility	Butyricicoccus	rs12034718	A	G	0.0701199	0.0158214	9.58e-06	0.00697951	0.0181284	0.700235	0.00120827	19.64
Female infertility	Blautia	rs67794373	C	T	0.0601709	0.0123443	1e-06	-0.000964522	0.0180915	0.957482	0.00130679	23.7571
Female infertility	Blautia	rs11149971	C	T	0.117605	0.02339	1.04e-06	-0.0276691	0.0333006	0.406036	0.00155285	25.2777
Female infertility	Blautia	rs12453000	C	T	0.0625335	0.0129987	1.26e-06	0.0370733	0.0220181	0.0922274	0.0012974	23.1406
Female infertility	Blautia	rs72973581	A	G	0.125169	0.0265408	1.74e-06	-0.0593366	0.0326299	0.0689922	0.0017395	22.2381
Female infertility	Blautia	rs7860714	A	G	-0.0502178	0.0109853	4.09e-06	-0.00162198	0.0158052	0.918262	0.00114929	20.8952
Female infertility	Blautia	rs682885	A	G	-0.0493376	0.0107359	4.49e-06	-0.00271244	0.0161658	0.86675	0.00115437	21.117
Female infertility	Blautia	rs4926264	T	C	0.0826207	0.0178239	5.1e-06	0.0220828	0.0245846	0.369057	0.0011743	21.4844
Female infertility	Blautia	rs115043014	G	A	-0.206605	0.043992	5.19e-06	-0.0600726	0.0593413	0.311384	0.00447934	22.0475
Female infertility	Blautia	rs3005511	A	G	0.0501085	0.0110768	6.19e-06	-0.0321174	0.0164662	0.0511164	0.00111848	20.4621
Female infertility	Blautia	rs2788271	T	G	-0.0575596	0.0133492	7.16e-06	-0.0201944	0.0199094	0.310431	0.00101626	18.59
Female infertility	Blautia	rs16892041	T	C	-0.0622605	0.0141804	8.82e-06	0.0234388	0.0185323	0.20596	0.00105368	19.2753
Female infertility	Blautia	rs117001700	T	C	0.196414	0.0441122	8.84e-06	0.0418754	0.0640198	0.513047	0.00397721	19.8177
Female infertility	Bilophila	rs1571225	C	T	0.0826826	0.0170621	1.12e-06	-0.00632669	0.020338	0.755741	0.0018236	23.4797
Female infertility	Bilophila	rs7802841	C	A	0.0670097	0.0137701	1.77e-06	0.00879051	0.0164879	0.59393	0.00183865	23.6775
Female infertility	Bilophila	rs3827020	C	T	0.0766479	0.0160642	1.79e-06	-0.00669739	0.019095	0.725783	0.00179955	22.7621
Female infertility	Bilophila	rs6793291	C	A	0.112729	0.0241633	3.11e-06	-0.0469678	0.0344015	0.172164	0.00196564	21.7611
Female infertility	Bilophila	rs1241171	G	A	-0.0692654	0.0150148	4.24e-06	-0.0111404	0.0214933	0.604235	0.0016526	21.2777
Female infertility	Bilophila	rs542415	T	C	-0.0613623	0.0133436	4.71e-06	-0.0192125	0.0155121	0.215512	0.00165238	21.1441
Female infertility	Bilophila	rs72676854	T	C	0.123209	0.026882	5.62e-06	-0.0919502	0.0347726	0.00818521	0.00180517	21.0031
Female infertility	Bilophila	rs2728491	G	T	-0.0627416	0.0139456	6.33e-06	-0.0260968	0.0177002	0.140381	0.00157197	20.2379
Female infertility	Bilophila	rs4798126	G	A	0.073288	0.016799	7.15e-06	-0.0345999	0.0190231	0.0689366	0.00148739	19.0297
Female infertility	Bilophila	rs11069458	T	C	-0.0680947	0.015503	7.72e-06	-0.00577945	0.0196165	0.768283	0.00149843	19.2898
Female infertility	Bilophila	rs60178956	G	A	-0.0624818	0.0141485	8.06e-06	0.0232542	0.0180946	0.198742	0.00152403	19.4993
Female infertility	Bilophila	rs1969927	G	A	0.0564589	0.0126935	9.07e-06	0.00706521	0.0160305	0.659405	0.00154597	19.7804
Female infertility	Bilophila	rs9899990	A	G	-0.102702	0.0233878	9.07e-06	0.00524168	0.0273562	0.848049	0.0015927	19.2801
Female infertility	Bifidobacterium	rs7322849	T	C	0.112428	0.0201813	1.08e-08	0.0297716	0.0263218	0.258029	0.0020957	31.0311
Female infertility	Bifidobacterium	rs62181700	G	A	-0.0624643	0.0131205	2.17e-06	0.0241917	0.0175446	0.167936	0.00153179	22.6622
Female infertility	Bifidobacterium	rs56108664	T	C	0.0729971	0.0157926	2.44e-06	0.00936968	0.0224153	0.675944	0.00153294	21.362
Female infertility	Bifidobacterium	rs857444	C	T	0.0558234	0.0121219	3.57e-06	0.0146171	0.0157016	0.351889	0.00143311	21.2047
Female infertility	Bifidobacterium	rs75344046	C	T	0.232354	0.0505979	4.86e-06	-0.0423193	0.0358885	0.238323	0.00543914	21.0771
Female infertility	Bifidobacterium	rs540489	T	G	-0.0637641	0.0138746	5.19e-06	0.0143328	0.0198164	0.469506	0.00144841	21.118
Female infertility	Bifidobacterium	rs55888705	A	G	0.0546319	0.0121139	6.67e-06	0.0217878	0.016781	0.194164	0.0013745	20.3362
Female infertility	Bifidobacterium	rs2686790	T	C	0.070741	0.0157926	7.5e-06	0.00692691	0.0212842	0.744842	0.00135591	20.0621
Female infertility	Bifidobacterium	rs12022129	G	A	0.0619356	0.0138937	8e-06	0.0257145	0.016978	0.12988	0.00134308	19.8693
Female infertility	Bifidobacterium	rs2491158	G	A	0.0712624	0.015983	8.05e-06	0.0136788	0.0222861	0.539358	0.00141583	19.8766
Female infertility	Bifidobacterium	rs5746486	T	C	-0.0536216	0.0120801	9e-06	0.00775452	0.015501	0.616893	0.00133152	19.7008
Female infertility	Barnesiella	rs2276875	A	G	-0.0697176	0.0139537	4.65e-07	-0.0330898	0.0173828	0.0569626	0.00179362	24.9599
Female infertility	Barnesiella	rs2428166	G	A	-0.165859	0.0337309	8.51e-07	0.00414532	0.0644777	0.948739	0.00297936	24.172
Female infertility	Barnesiella	rs13242616	T	C	-0.0583747	0.0123176	2.29e-06	-0.00598701	0.0163768	0.714679	0.00160798	22.4562
Female infertility	Barnesiella	rs35177866	A	G	0.0917125	0.0190133	2.95e-06	-0.0424919	0.0290646	0.143746	0.00173411	23.2635
Female infertility	Barnesiella	rs199035	G	A	0.0559495	0.0119716	3e-06	-0.00053039	0.0152146	0.972191	0.00156384	21.8388
Female infertility	Barnesiella	rs77455852	T	G	-0.0891491	0.0195601	3.16e-06	-0.0130418	0.0217385	0.548548	0.0015485	20.7696
Female infertility	Barnesiella	rs79795328	A	G	-0.0818645	0.0176441	4.23e-06	0.031737	0.0218776	0.146874	0.00157382	21.5243
Female infertility	Barnesiella	rs62251337	A	G	-0.0690763	0.0149374	4.24e-06	0.0160955	0.0216236	0.456665	0.00153117	21.3818
Female infertility	Barnesiella	rs12909713	C	T	-0.0550716	0.0120039	4.95e-06	0.00192456	0.0151021	0.898595	0.00147954	21.045
Female infertility	Barnesiella	rs72684847	T	C	-0.114369	0.0253873	6.76e-06	-0.0532552	0.0286048	0.0626369	0.00156062	20.2917
Female infertility	Barnesiella	rs76181748	C	T	-0.0778559	0.017164	6.78e-06	0.0141821	0.0180119	0.431064	0.00144677	20.5724
Female infertility	Barnesiella	rs11155559	T	C	0.0956023	0.0212961	8.92e-06	-0.0404108	0.0262107	0.123131	0.00150359	20.1499
Female infertility	Bacteroides	rs6795673	C	T	0.0538565	0.0105251	3.38e-07	-0.0019408	0.0150846	0.897626	0.00142865	26.1803
Female infertility	Bacteroides	rs11585893	A	G	-0.0740746	0.0147633	1.8e-06	-0.0246056	0.0177583	0.165875	0.00141067	25.1722
Female infertility	Bacteroides	rs17619981	T	G	0.0880978	0.0187002	2.69e-06	-0.0319234	0.0221698	0.149882	0.00140263	22.1913
Female infertility	Bacteroides	rs2023437	T	C	-0.0782324	0.0167634	5.02e-06	-0.0234575	0.0229558	0.306851	0.00124414	21.7771
Female infertility	Bacteroides	rs66710942	C	T	0.0488038	0.0107412	5.86e-06	0.0127705	0.0151425	0.399031	0.00115709	20.642
Female infertility	Bacteroides	rs1340391	T	C	-0.0592004	0.0132244	6.73e-06	0.00239379	0.0221701	0.914017	0.00109376	20.0377
Female infertility	Bacteroides	rs13207588	A	G	-0.059205	0.0131195	7.49e-06	0.00840842	0.0193498	0.66389	0.00114879	20.3627
Female infertility	Anaerotruncus	rs6563550	T	C	0.0877135	0.0176745	2.35e-07	-0.00787014	0.02816	0.779877	0.00148449	24.6256
Female infertility	Anaerotruncus	rs8005030	C	T	0.0554447	0.0117854	2.28e-06	-0.00697748	0.0160524	0.663804	0.00133568	22.1297
Female infertility	Anaerotruncus	rs4669806	G	T	0.0576389	0.0122994	2.42e-06	0.0169541	0.0183479	0.355468	0.00132395	21.9589
Female infertility	Anaerotruncus	rs9347879	T	C	0.050618	0.011049	4.22e-06	0.015009	0.0151079	0.320489	0.00126531	20.9851
Female infertility	Anaerotruncus	rs1272208	G	T	-0.0611743	0.0129831	4.28e-06	-0.018716	0.0178673	0.294869	0.00137563	22.1988
Female infertility	Anaerotruncus	rs11018566	A	G	-0.156465	0.0366032	6.14e-06	-0.0295244	0.0336186	0.379825	0.00290211	18.2666
Female infertility	Anaerotruncus	rs6494922	A	G	0.0903106	0.0202257	6.62e-06	-0.0320283	0.0338338	0.343824	0.00123937	19.9351
Female infertility	Anaerotruncus	rs10150232	A	G	0.0567088	0.0124877	6.68e-06	-0.0258552	0.0189071	0.171472	0.0012779	20.6197
Female infertility	Anaerotruncus	rs115414803	A	C	-0.144356	0.0317524	6.83e-06	-0.0368152	0.0313936	0.240917	0.00222397	20.6644
Female infertility	Anaerotruncus	rs1431492	C	T	-0.0654996	0.0146188	7.36e-06	-0.001448	0.0207609	0.944396	0.00121079	20.0725
Female infertility	Anaerotruncus	rs17734739	T	C	0.0660052	0.014908	7.43e-06	-0.00651662	0.0217707	0.764689	0.00122927	19.6002
Female infertility	Anaerotruncus	rs7155595	C	A	0.0539336	0.0118903	7.55e-06	0.0279446	0.0165041	0.0904191	0.00124142	20.5722
Female infertility	Anaerotruncus	rs34449434	A	C	-0.0497004	0.0113402	9.85e-06	0.0202012	0.0159271	0.204671	0.00119035	19.2054
Female infertility	Anaerostipes	rs7193624	C	T	0.0750642	0.0150723	5.35e-07	-0.0287667	0.0273647	0.293151	0.00146324	24.8001
Female infertility	Anaerostipes	rs62157625	T	C	0.088573	0.0185548	1.45e-06	-0.0100404	0.0232114	0.665333	0.00149544	22.7842
Female infertility	Anaerostipes	rs62215703	G	A	0.0644965	0.0136702	1.98e-06	-0.0020972	0.0183362	0.908941	0.00142946	22.2571
Female infertility	Anaerostipes	rs2804244	A	G	-0.053089	0.0110983	2.04e-06	0.0078393	0.0155387	0.613909	0.00135007	22.8795
Female infertility	Anaerostipes	rs3900776	G	A	-0.110013	0.0236302	2.75e-06	0.00149618	0.0459604	0.97403	0.00147291	21.6719
Female infertility	Anaerostipes	rs2396460	T	C	-0.0512653	0.0109555	2.91e-06	-0.0157893	0.0152314	0.299908	0.00129307	21.8941
Female infertility	Anaerostipes	rs6854026	T	C	-0.0508482	0.0109075	3.2e-06	0.00224693	0.0152725	0.883035	0.00128267	21.7294
Female infertility	Anaerostipes	rs6726833	C	A	-0.0877497	0.0189408	3.32e-06	0.0177461	0.0281304	0.528137	0.0012666	21.4606
Female infertility	Anaerostipes	rs60983350	G	A	-0.0539901	0.0116575	4.42e-06	0.0166325	0.0162401	0.305757	0.00131065	21.4468
Female infertility	Anaerostipes	rs2014785	T	C	0.0515687	0.0112199	4.68e-06	-0.00294701	0.0153871	0.848115	0.00128294	21.1224
Female infertility	Anaerostipes	rs78735375	A	C	-0.137429	0.0305304	5.33e-06	-0.0212603	0.0385633	0.581421	0.001952	20.2584
Female infertility	Anaerostipes	rs6474958	A	G	-0.0500065	0.0112001	6.74e-06	0.00178538	0.0163804	0.913207	0.00117693	19.9324
Female infertility	Anaerostipes	rs10502061	A	G	0.0835752	0.0192017	7.94e-06	-0.0286907	0.0237368	0.226778	0.00112469	18.942
Female infertility	Anaerofilum	rs816292	T	C	-0.113003	0.02204	2.64e-07	-0.00631387	0.0165938	0.703578	0.00521241	26.2772
Female infertility	Anaerofilum	rs79598899	C	T	0.182586	0.0357284	3.75e-07	-0.0284375	0.0362153	0.432317	0.00551538	26.1049
Female infertility	Anaerofilum	rs712981	A	C	0.10076	0.0202902	6.83e-07	0.00164035	0.0155005	0.915721	0.00485854	24.6505
Female infertility	Anaerofilum	rs4506496	G	A	0.10309	0.0212861	1.49e-06	-0.00726782	0.0166439	0.662354	0.00473034	23.4457
Female infertility	Anaerofilum	rs10794359	T	C	-0.0953524	0.02006	2.23e-06	0.0149467	0.0153353	0.329728	0.00450395	22.5854
Female infertility	Anaerofilum	rs17096874	C	T	-0.126337	0.0268919	2.86e-06	-0.0540007	0.0186657	0.00381522	0.00435058	22.062
Female infertility	Anaerofilum	rs1563175	A	C	0.0923834	0.0202157	5.54e-06	0.0234785	0.0151478	0.12115	0.00411757	20.8755
Female infertility	Anaerofilum	rs356049	G	A	0.132603	0.0289802	6.56e-06	-0.0275715	0.030435	0.364982	0.00417482	20.9281
Female infertility	Anaerofilum	rs17012738	T	G	0.0903417	0.0200239	7.24e-06	0.0130039	0.0151252	0.389928	0.00401378	20.3472
Female infertility	Anaerofilum	rs9299345	T	C	-0.1364	0.0302372	8.04e-06	-0.0107159	0.0255681	0.675134	0.00401255	20.341
Female infertility	Anaerofilum	rs4244069	G	A	-0.146775	0.0326594	9.81e-06	0.00625676	0.0228644	0.784356	0.00399923	20.1888
Female infertility	Alloprevotella	rs4680035	A	G	-0.119599	0.0259446	4.99e-06	-0.0188414	0.0155322	0.225109	0.00701735	21.2361
Female infertility	Alloprevotella	rs58212166	A	G	-0.161506	0.0359102	7.94e-06	-0.0127147	0.019432	0.512906	0.00668624	20.2139
Female infertility	Alloprevotella	rs2154444	T	G	0.138234	0.0308961	8.37e-06	0.00309329	0.0171663	0.856999	0.00660881	20.0049
Female infertility	Alloprevotella	rs4364940	A	G	0.126418	0.0282207	8.58e-06	-0.00448049	0.0163661	0.784263	0.00662695	20.0535
Female infertility	Alloprevotella	rs34619204	G	A	-0.156037	0.0344392	8.84e-06	0.0125654	0.0199431	0.528655	0.00678943	20.5144
Female infertility	Allisonella	rs602075	A	G	0.168974	0.0296976	3.57e-08	0.0119404	0.017169	0.486766	0.00997858	32.3541
Female infertility	Allisonella	rs35778461	C	T	0.146679	0.0297186	1.21e-06	0.00416452	0.0180265	0.817298	0.007527	24.3449
Female infertility	Allisonella	rs6742198	G	A	0.149152	0.0316484	3.35e-06	-0.0470727	0.0178246	0.00826875	0.00693158	22.1963
Female infertility	Allisonella	rs1901739	T	G	0.115769	0.0248626	3.59e-06	0.013124	0.0151344	0.385852	0.00670486	21.6679
Female infertility	Allisonella	rs35110698	T	C	-0.146322	0.0320852	5.72e-06	-0.0134089	0.0215985	0.534713	0.00643326	20.7845
Female infertility	Allisonella	rs76904847	G	A	0.148523	0.0334857	6.09e-06	-0.00448843	0.0200546	0.822905	0.00614462	19.6607
Female infertility	Allisonella	rs7898615	T	G	0.167966	0.0373586	8.87e-06	-0.0204057	0.0221607	0.357151	0.00625407	20.2019
Female infertility	Allisonella	rs594561	C	T	0.112231	0.0251681	9.41e-06	0.010193	0.015089	0.499344	0.00615272	19.8725
Female infertility	Alistipes	rs11769002	G	A	-0.0528793	0.0109389	1.45e-06	-0.00291981	0.0153333	0.848978	0.00132817	23.3657
Female infertility	Alistipes	rs7129639	C	A	-0.0524955	0.0109584	1.78e-06	-0.0249408	0.0160178	0.119454	0.00130433	22.9458
Female infertility	Alistipes	rs1107244	G	A	0.0758558	0.0171182	3.59e-06	-0.00779993	0.02816	0.78179	0.00111629	19.6341
Female infertility	Alistipes	rs34417064	A	G	-0.048202	0.0106868	7.01e-06	0.0228703	0.0152096	0.132664	0.00115653	20.3414
Female infertility	Alistipes	rs2450745	A	C	-0.080524	0.0184702	7.12e-06	0.00188685	0.0296584	0.949273	0.00108054	19.0046
Female infertility	Alistipes	rs4810359	A	G	-0.0652428	0.0146155	7.5e-06	-0.0224185	0.0230439	0.330623	0.00114522	19.9244
Female infertility	Alistipes	rs12990744	C	T	-0.0776618	0.0172986	8.21e-06	0.0139003	0.0252376	0.581787	0.0012059	20.1531
Female infertility	Alistipes	rs2875322	T	C	-0.0580945	0.0131432	8.78e-06	0.00847728	0.0201632	0.674169	0.00111779	19.5351
Female infertility	Alistipes	rs2290844	C	T	0.0813969	0.0191632	9.1e-06	-0.0379514	0.0238726	0.111891	0.00102574	18.0398
Female infertility	Alistipes	rs11958296	A	G	-0.0981222	0.0218272	9.3e-06	0.0398305	0.037007	0.281795	0.00124482	20.2062
Female infertility	Akkermansia	rs11729256	T	C	0.0750473	0.0150184	6.58e-07	0.0105476	0.0200659	0.599134	0.00210099	24.966
Female infertility	Akkermansia	rs4936098	A	G	0.0649225	0.0135934	1.1e-06	0.0114605	0.0158115	0.468563	0.00192011	22.8067
Female infertility	Akkermansia	rs74542928	T	C	0.112623	0.0236434	1.48e-06	0.0275821	0.0357418	0.440289	0.00201908	22.6858
Female infertility	Akkermansia	rs12908520	G	A	0.061772	0.0130954	2.26e-06	0.0287965	0.0152579	0.059118	0.0018723	22.2471
Female infertility	Akkermansia	rs9349825	A	G	-0.0703407	0.0147133	2.6e-06	-0.0093802	0.0194054	0.628825	0.0019239	22.8518
Female infertility	Akkermansia	rs2602429	C	T	0.0745352	0.0156201	2.72e-06	-0.0275959	0.0171917	0.108453	0.00194416	22.7656
Female infertility	Akkermansia	rs4242783	G	A	0.0685454	0.0147701	3e-06	0.0033234	0.0168239	0.843404	0.00183914	21.5336
Female infertility	Akkermansia	rs117107102	A	G	0.204406	0.0431629	3.01e-06	-0.0695143	0.0359218	0.0529712	0.00448856	22.4178
Female infertility	Akkermansia	rs111862613	T	C	0.0911199	0.0196748	3.39e-06	0.0115869	0.0200972	0.564248	0.00184246	21.4452
Female infertility	Akkermansia	rs61779207	G	A	-0.0760539	0.0167769	6.32e-06	0.0181899	0.0181586	0.316479	0.00176997	20.5468
Female infertility	Akkermansia	rs941682	G	A	-0.0632957	0.0143777	9.17e-06	-0.0100993	0.016927	0.550748	0.00163864	19.3775
Female infertility	Adlercreutzia	rs7680684	C	T	-0.083381	0.0168901	9.77e-07	-0.00135383	0.0158777	0.93205	0.00294783	24.3649
Female infertility	Adlercreutzia	rs2717140	C	T	-0.119225	0.0251081	2.05e-06	-0.0026613	0.02516	0.915761	0.00272795	22.5425
Female infertility	Adlercreutzia	rs9490822	C	T	-0.0734512	0.0155789	2.54e-06	0.0068389	0.0151983	0.652728	0.00268949	22.2238
Female infertility	Adlercreutzia	rs13231526	C	A	0.143237	0.0311654	4.81e-06	-0.0274878	0.0278283	0.323269	0.00261684	21.1182
Female infertility	Adlercreutzia	rs6664405	T	C	-0.0953084	0.0210752	5.23e-06	0.0311383	0.0217082	0.151457	0.00253378	20.4462
Female infertility	Adlercreutzia	rs9915817	T	C	0.0749219	0.016833	8.22e-06	0.0143565	0.0166776	0.389334	0.00239754	19.8056
Female infertility	Adlercreutzia	rs55719207	G	A	-0.0699243	0.0158036	9.61e-06	-0.00563107	0.0154956	0.716308	0.00236934	19.5721
Female infertility	Adlercreutzia	rs11604400	C	T	-0.102524	0.0234834	9.74e-06	-0.0119593	0.0247373	0.628773	0.00234559	19.0557
Female infertility	Actinomyces	rs34583783	G	T	0.126596	0.0268461	4.49e-06	0.00378862	0.0316727	0.904786	0.00296881	22.2311
Female infertility	Actinomyces	rs4146653	G	A	0.0985224	0.0214182	4.5e-06	-0.0220244	0.0216417	0.308828	0.00282533	21.1537
Female infertility	Actinomyces	rs7915461	T	C	0.18776	0.0401636	5.92e-06	-0.0386208	0.0298873	0.196282	0.00412048	21.8462
Female infertility	Actinomyces	rs2715439	C	T	0.0746684	0.0164822	6.27e-06	-0.0027757	0.0150984	0.854138	0.00274061	20.5177
Female infertility	Actinomyces	rs35011108	A	G	0.232634	0.0512044	6.34e-06	-0.0289944	0.0302792	0.33828	0.00583798	20.6293
Female infertility	Actinomyces	rs4073240	G	A	0.0749687	0.0167368	7.94e-06	0.0123217	0.0155625	0.428504	0.00267944	20.0585
Female infertility	Actinomyces	rs71315246	A	G	-0.0969809	0.021925	9.83e-06	-0.0062595	0.0220238	0.776245	0.00261307	19.5603
Female infertility	Ruminococcusgnavusgroup	rs13163520	G	A	-0.127377	0.0233883	5.61e-08	0.00294523	0.0193562	0.879062	0.00466688	29.6517
Female infertility	Ruminococcusgnavusgroup	rs2909242	C	A	-0.0909965	0.018351	7.41e-07	0.0159757	0.0160723	0.320228	0.00382663	24.5807
Female infertility	Ruminococcusgnavusgroup	rs3124783	A	G	-0.11599	0.0249099	2.67e-06	0.0458524	0.0225411	0.0419344	0.00337581	21.675
Female infertility	Ruminococcusgnavusgroup	rs934940	A	C	-0.105045	0.0229588	2.74e-06	-0.0203885	0.0222155	0.358745	0.00330713	20.9273
Female infertility	Ruminococcusgnavusgroup	rs12136548	C	T	0.0901946	0.0196476	3.1e-06	-0.00130842	0.0166405	0.937328	0.00328146	21.0672
Female infertility	Ruminococcusgnavusgroup	rs62167033	T	C	0.185289	0.0396295	3.5e-06	0.014169	0.0380898	0.7099	0.00419117	21.8522
Female infertility	Ruminococcusgnavusgroup	rs11864644	T	C	-0.139804	0.0318253	5.01e-06	0.00914403	0.0238277	0.70116	0.00308245	19.2909
Female infertility	Ruminococcusgnavusgroup	rs78399089	T	C	0.144445	0.0326618	6.63e-06	0.0435397	0.0236938	0.0661211	0.00327959	19.5514
Female infertility	Ruminococcusgnavusgroup	rs11597105	A	G	0.114673	0.0250653	6.95e-06	-0.0154683	0.0190284	0.416273	0.00329667	20.9237
Female infertility	Ruminococcusgnavusgroup	rs12989336	G	A	-0.0846861	0.0187936	7.12e-06	0.0095069	0.0169115	0.574009	0.00316213	20.2987
Female infertility	Ruminococcusgnavusgroup	rs4388134	C	T	-0.0904997	0.0203544	9.12e-06	-0.0344	0.016892	0.0417033	0.00307982	19.7625
Female infertility	Ruminococcusgauvreauiigroup	rs10931481	G	A	0.0610096	0.0130484	3.38e-06	-0.0271934	0.016617	0.101738	0.00163098	21.8582
Female infertility	Ruminococcusgauvreauiigroup	rs12079579	A	G	0.0955324	0.0213436	5.04e-06	0.0353207	0.0273677	0.196843	0.00154035	20.0308
Female infertility	Ruminococcusgauvreauiigroup	rs12539819	C	T	0.110654	0.0240684	4.49e-06	0.0266312	0.0305717	0.383697	0.00177901	21.1332
Female infertility	Ruminococcusgauvreauiigroup	rs1391597	C	T	0.0590284	0.0124874	1.86e-06	-0.0189329	0.015408	0.219157	0.001667	22.3417
Female infertility	Ruminococcusgauvreauiigroup	rs2047242	A	G	-0.067603	0.0133738	2.46e-07	0.0166868	0.0181081	0.356785	0.00190764	25.5481
Female infertility	Ruminococcusgauvreauiigroup	rs2166943	A	C	0.0566974	0.0123497	5.28e-06	0.024555	0.0152799	0.108053	0.00157316	21.0742
Female infertility	Ruminococcusgauvreauiigroup	rs289410	G	A	-0.0654926	0.0139101	2.27e-06	0.0308199	0.0168375	0.0671846	0.00165405	22.1645
Female infertility	Ruminococcusgauvreauiigroup	rs431418	A	G	-0.094737	0.0210157	5.54e-06	-0.041032	0.0258287	0.112146	0.00152685	20.3182
Female infertility	Ruminococcusgauvreauiigroup	rs71386687	T	G	0.121037	0.02386	2.91e-07	0.0193055	0.0242637	0.426234	0.00226412	25.7288
Female infertility	Ruminococcusgauvreauiigroup	rs73802842	C	A	0.0736808	0.0169665	7.48e-06	0.0228409	0.0178592	0.200917	0.00140732	18.8565
Female infertility	Ruminococcusgauvreauiigroup	rs9870933	A	G	0.0621643	0.0126072	8.49e-07	0.0105334	0.0154334	0.494918	0.00181358	24.3098
Female infertility	Eubacteriumxylanophilumgroup	rs17830032	G	A	-0.160597	0.0310515	2.39e-07	0.0317038	0.0280179	0.25782	0.00279988	26.7437
Female infertility	Eubacteriumxylanophilumgroup	rs13239072	G	A	0.0687427	0.0142728	1.82e-06	-0.00989296	0.0169287	0.558958	0.00174019	23.1936
Female infertility	Eubacteriumxylanophilumgroup	rs10917203	A	C	0.0612633	0.0130917	3.15e-06	0.0104611	0.0155139	0.500117	0.00169074	21.8949
Female infertility	Eubacteriumxylanophilumgroup	rs112176119	C	T	-0.113455	0.0245762	3.33e-06	-0.0282112	0.0260293	0.278442	0.00174397	21.3084
Female infertility	Eubacteriumxylanophilumgroup	rs1999224	G	T	-0.0949051	0.0203503	3.75e-06	-0.0249028	0.0253595	0.326105	0.00163149	21.7457
Female infertility	Eubacteriumxylanophilumgroup	rs2213117	T	G	0.0877797	0.0189012	4.21e-06	0.00104796	0.0207056	0.959634	0.00167199	21.5646
Female infertility	Eubacteriumxylanophilumgroup	rs10140184	A	C	0.0576795	0.012599	4.96e-06	-0.00387076	0.0154169	0.801758	0.00161834	20.9558
Female infertility	Eubacteriumxylanophilumgroup	rs2012708	A	G	0.0573202	0.0126905	6.53e-06	0.00236556	0.0159449	0.88206	0.0015309	20.3983
Female infertility	Eubacteriumxylanophilumgroup	rs75586835	A	G	-0.114498	0.0263455	9.39e-06	0.0249797	0.0296028	0.398764	0.00150274	18.8848
Female infertility	Eubacteriumventriosumgroup	rs11617697	A	G	-0.143349	0.0286241	7.22e-07	0.0403532	0.0330089	0.221521	0.00217667	25.0754
Female infertility	Eubacteriumventriosumgroup	rs57199565	T	C	0.0783394	0.0160257	7.97e-07	-0.00717143	0.0198561	0.717973	0.0015998	23.8929
Female infertility	Eubacteriumventriosumgroup	rs73615400	T	C	-0.0956303	0.0193428	9.54e-07	0.0168812	0.0253885	0.506104	0.00161122	24.4398
Female infertility	Eubacteriumventriosumgroup	rs16884680	G	T	-0.0906428	0.0191909	1.74e-06	0.00793043	0.0248544	0.74967	0.00145701	22.3059
Female infertility	Eubacteriumventriosumgroup	rs12964517	G	A	0.0587198	0.0123453	2.07e-06	-0.00470444	0.0168026	0.779491	0.00147755	22.6207
Female infertility	Eubacteriumventriosumgroup	rs876734	C	T	-0.0618696	0.0132532	2.89e-06	0.0254205	0.0169201	0.132997	0.00145919	21.7898
Female infertility	Eubacteriumventriosumgroup	rs78250280	G	A	0.0749762	0.0164404	3.36e-06	-0.00621755	0.0216925	0.774401	0.00139999	20.7951
Female infertility	Eubacteriumventriosumgroup	rs3809430	T	C	-0.0548171	0.0118426	3.55e-06	0.00186406	0.0163614	0.909293	0.00139962	21.4232
Female infertility	Eubacteriumventriosumgroup	rs73849225	T	C	0.0975711	0.0224388	5.21e-06	-0.000146423	0.0275904	0.995766	0.00129578	18.9053
Female infertility	Eubacteriumventriosumgroup	rs35179274	C	T	-0.0627263	0.013786	5.76e-06	-0.000751992	0.0197906	0.96969	0.00135243	20.6999
Female infertility	Eubacteriumventriosumgroup	rs66746423	C	T	0.0751501	0.0164978	6.11e-06	-0.0346277	0.021037	0.0997562	0.00142131	20.7465
Female infertility	Eubacteriumventriosumgroup	rs72783037	C	A	0.0658926	0.0143747	6.55e-06	-0.0189261	0.0186284	0.309639	0.00137273	21.0097
Female infertility	Eubacteriumventriosumgroup	rs6704822	A	G	0.0739179	0.0166705	6.62e-06	0.0122977	0.0222764	0.580913	0.0012843	19.6583
Female infertility	Eubacteriumventriosumgroup	rs9316536	T	G	-0.0817111	0.0183121	7.84e-06	-0.0145709	0.0217202	0.502318	0.00130059	19.9081
Female infertility	Eubacteriumventriosumgroup	rs13082419	C	T	-0.0715522	0.016137	9.56e-06	-0.0415061	0.0241374	0.0855086	0.00135399	19.6581
Female infertility	Eubacteriumruminantiumgroup	rs2116427	A	G	0.0911461	0.0182353	4.67e-07	-0.023796	0.0173303	0.169727	0.00321784	24.9768
Female infertility	Eubacteriumruminantiumgroup	rs139749	C	T	-0.0845439	0.0171791	8.59e-07	0.00711184	0.0159976	0.656641	0.00330046	24.2129
Female infertility	Eubacteriumruminantiumgroup	rs2229917	A	G	0.153538	0.0323922	2.16e-06	-0.0802196	0.0378234	0.0339305	0.00317672	22.4609
Female infertility	Eubacteriumruminantiumgroup	rs16891896	G	A	-0.174787	0.0390573	2.38e-06	-0.0132279	0.0270086	0.6243	0.00419586	20.0185
Female infertility	Eubacteriumruminantiumgroup	rs10131724	A	C	-0.199832	0.0414577	2.39e-06	-0.010437	0.0255547	0.682966	0.00456081	23.2247
Female infertility	Eubacteriumruminantiumgroup	rs7000472	A	G	-0.0762282	0.016523	4.07e-06	-0.00609171	0.0154317	0.693025	0.00274268	21.2785
Female infertility	Eubacteriumruminantiumgroup	rs17519472	C	T	0.107804	0.0233984	4.7e-06	-0.00250975	0.0217424	0.908103	0.00274569	21.222
Female infertility	Eubacteriumruminantiumgroup	rs606117	A	G	0.0833243	0.018056	4.82e-06	0.0140623	0.0170266	0.408859	0.00292357	21.2903
Female infertility	Eubacteriumruminantiumgroup	rs57340348	T	C	-0.0979429	0.0212166	4.93e-06	0.0035386	0.0188736	0.851277	0.0029052	21.3047
Female infertility	Eubacteriumruminantiumgroup	rs73139629	A	C	-0.115098	0.0247909	5.36e-06	0.00703885	0.0264408	0.790076	0.00293843	21.5491
Female infertility	Eubacteriumruminantiumgroup	rs11637981	G	T	-0.073258	0.0160888	5.44e-06	-0.00443586	0.0152319	0.77088	0.00267913	20.7277
Female infertility	Eubacteriumruminantiumgroup	rs2418654	C	T	-0.0748879	0.0165852	6.17e-06	-0.00173537	0.0155249	0.910998	0.00277984	20.3829
Female infertility	Eubacteriumruminantiumgroup	rs6676699	G	T	-0.0888124	0.0196447	6.38e-06	-0.0268942	0.0164769	0.102631	0.00264462	20.4335
Female infertility	Eubacteriumruminantiumgroup	rs10923018	G	A	0.0726438	0.0160924	6.8e-06	0.0160966	0.0152809	0.292166	0.0026262	20.3724
Female infertility	Eubacteriumruminantiumgroup	rs13025464	T	C	-0.0737077	0.0163786	6.97e-06	0.0200563	0.0154307	0.193682	0.00261042	20.247
Female infertility	Eubacteriumruminantiumgroup	rs2817174	C	T	-0.0734306	0.0163687	7.87e-06	-0.0125912	0.0154827	0.416079	0.00260339	20.1193
Female infertility	Eubacteriumruminantiumgroup	rs209813	G	A	-0.103488	0.0236391	9.23e-06	-0.0282358	0.02151	0.189291	0.00263148	19.1602
Female infertility	Eubacteriumrectalegroup	rs35398954	A	G	-0.0901402	0.0174602	5.4e-07	0.0214016	0.0206425	0.29984	0.00160098	26.6494
Female infertility	Eubacteriumrectalegroup	rs314726	T	C	0.0528824	0.0109486	1.38e-06	0.0050397	0.0152407	0.740892	0.00137318	23.3266
Female infertility	Eubacteriumrectalegroup	rs10797540	A	G	0.0503179	0.0108389	3.53e-06	0.00130203	0.0151963	0.93172	0.0012406	21.5487
Female infertility	Eubacteriumrectalegroup	rs10248854	C	A	-0.0527827	0.0113463	4.21e-06	0.00495216	0.015504	0.749414	0.00124589	21.6382
Female infertility	Eubacteriumrectalegroup	rs59427698	A	G	-0.0576035	0.0130853	5.37e-06	0.00491235	0.0194963	0.80107	0.00116513	19.3765
Female infertility	Eubacteriumrectalegroup	rs2884897	A	G	-0.129364	0.0289021	6.44e-06	0.105194	0.0400467	0.00861926	0.00184934	20.0303
Female infertility	Eubacteriumrectalegroup	rs143694765	T	C	0.0870025	0.019779	9.75e-06	0.026588	0.0251101	0.289666	0.00127772	19.3464
Female infertility	Eubacteriumrectalegroup	rs62547233	A	G	0.0536319	0.0120201	9.9e-06	0.0273954	0.0167602	0.102145	0.00114633	19.9059
Female infertility	Eubacteriumoxidoreducensgroup	rs440215	C	T	0.0932766	0.0195294	1.65e-06	0.00383305	0.0152009	0.800918	0.00422464	22.8038
Female infertility	Eubacteriumoxidoreducensgroup	rs2973294	G	T	0.0923559	0.0195439	2.39e-06	0.00269515	0.0152658	0.859864	0.00413511	22.3227
Female infertility	Eubacteriumoxidoreducensgroup	rs34561138	G	A	0.216145	0.045992	2.51e-06	-0.0666893	0.0394075	0.0905879	0.0052486	22.076
Female infertility	Eubacteriumoxidoreducensgroup	rs12423772	G	T	0.14098	0.0295029	2.63e-06	-0.00312274	0.0216698	0.885417	0.00427298	22.8255
Female infertility	Eubacteriumoxidoreducensgroup	rs12129908	C	A	0.0893272	0.0198333	5.8e-06	-0.0126232	0.0154268	0.413204	0.0037584	20.2776
Female infertility	Eubacteriumnodatumgroup	rs34297067	A	G	-0.186907	0.0341475	6.6e-08	0.00608994	0.0213102	0.77505	0.00907593	29.941
Female infertility	Eubacteriumnodatumgroup	rs77910827	C	T	0.201788	0.0413568	9.05e-07	0.0393029	0.0244306	0.107669	0.00722551	23.7921
Female infertility	Eubacteriumnodatumgroup	rs61841040	G	T	0.160621	0.0341609	3.56e-06	0.00494336	0.0191158	0.795943	0.00666479	22.0944
Female infertility	Eubacteriumnodatumgroup	rs113893692	C	T	-0.185107	0.0403573	5.76e-06	-0.0150985	0.02332	0.517342	0.00654155	21.0247
Female infertility	Eubacteriumnodatumgroup	rs7880204	T	C	-0.125454	0.0275303	6.84e-06	-0.027677	0.0175352	0.114481	0.00626459	20.753
Female infertility	Eubacteriumnodatumgroup	rs7827125	C	T	0.1223	0.0271331	7.17e-06	-0.00970472	0.0168677	0.565059	0.00612996	20.3043
Female infertility	Eubacteriumnodatumgroup	rs9425984	T	C	-0.130234	0.0292347	7.21e-06	-0.0316474	0.0182784	0.0833777	0.00598852	19.833
Female infertility	Eubacteriumnodatumgroup	rs6818880	A	G	-0.110081	0.0245964	7.83e-06	0.0306525	0.0151912	0.0436134	0.00604942	20.0176
Female infertility	Eubacteriumnodatumgroup	rs11006576	A	G	-0.110167	0.024593	7.99e-06	-0.0152255	0.015231	0.317486	0.00605327	20.0548
Female infertility	Eubacteriumnodatumgroup	rs10458299	T	C	-0.187753	0.041969	8.37e-06	-0.00226586	0.0287513	0.937185	0.00608115	20.0009
Female infertility	Eubacteriumnodatumgroup	rs10263623	C	T	0.193496	0.0439023	8.91e-06	0.0305291	0.0404628	0.45055	0.0062674	19.4127
Female infertility	Eubacteriumhalliigroup	rs13116360	T	C	0.154124	0.0297185	2.94e-07	0.00999258	0.0306705	0.744573	0.00259868	26.8908
Female infertility	Eubacteriumhalliigroup	rs10798999	C	T	0.0601661	0.0126752	2.61e-06	-0.0286566	0.0170698	0.0931944	0.00135867	22.5288
Female infertility	Eubacteriumhalliigroup	rs60254196	A	G	-0.0522832	0.0111865	2.7e-06	0.0267235	0.0151871	0.078473	0.00134344	21.8415
Female infertility	Eubacteriumhalliigroup	rs949971	T	G	-0.0540164	0.0116101	3.29e-06	0.0137157	0.0161204	0.394864	0.00130496	21.6436
Female infertility	Eubacteriumhalliigroup	rs74018587	C	T	0.208943	0.043822	3.7e-06	-0.0105656	0.0385682	0.784126	0.00742512	22.7188
Female infertility	Eubacteriumhalliigroup	rs10808115	A	C	-0.0504747	0.0109922	4.42e-06	0.0153793	0.0151109	0.308789	0.00127117	21.0825
Female infertility	Eubacteriumhalliigroup	rs28584818	A	G	0.126115	0.0268627	4.43e-06	0.0100555	0.0281378	0.720817	0.00198265	22.0372
Female infertility	Eubacteriumhalliigroup	rs6550770	T	C	-0.198087	0.0443545	4.82e-06	-0.0293424	0.0377841	0.437406	0.00463956	19.9359
Female infertility	Eubacteriumhalliigroup	rs10501370	C	T	-0.115589	0.0252489	5.42e-06	-0.0296506	0.0311883	0.341759	0.00151376	20.9549
Female infertility	Eubacteriumhalliigroup	rs117748144	T	C	-0.126582	0.028712	7.86e-06	0.0414455	0.0341365	0.224706	0.00178637	19.4329
Female infertility	Eubacteriumhalliigroup	rs78056098	G	T	-0.0507411	0.0113758	8.29e-06	-0.0026902	0.0157729	0.864571	0.0011994	19.8931
Female infertility	Eubacteriumhalliigroup	rs630939	C	T	-0.0508914	0.0114352	9.16e-06	0.00872037	0.0153022	0.568763	0.00121826	19.8037
Female infertility	Eubacteriumhalliigroup	rs281379	A	G	-0.0499523	0.0112153	9.33e-06	0.0354481	0.0153933	0.0212887	0.00122835	19.8352
Female infertility	Eubacteriumhalliigroup	rs17074066	T	C	-0.0813986	0.0189272	9.35e-06	0.0743517	0.0545746	0.173076	0.00116892	18.4929
Female infertility	Eubacteriumhalliigroup	rs17474256	G	A	0.0810805	0.0184573	9.45e-06	0.0270622	0.025461	0.287833	0.001171	19.2949
Female infertility	Eubacteriumfissicatenagroup	rs3771393	C	T	0.130842	0.0266671	7.38e-07	-0.00389878	0.0190825	0.83811	0.00630853	24.0611
Female infertility	Eubacteriumfissicatenagroup	rs2733072	G	A	0.109644	0.0228306	1.49e-06	-0.00213491	0.0151681	0.888068	0.00598126	23.0521
Female infertility	Eubacteriumfissicatenagroup	rs11876297	T	C	0.131469	0.0281712	2.67e-06	0.0167982	0.0171418	0.327107	0.00637228	21.7662
Female infertility	Eubacteriumfissicatenagroup	rs7104872	G	A	0.138612	0.0291906	2.73e-06	-0.00979475	0.0244317	0.688491	0.00585437	22.5366
Female infertility	Eubacteriumfissicatenagroup	rs151257695	A	G	0.20951	0.0454847	3.1e-06	0.0281725	0.0294619	0.338953	0.0058801	21.2049
Female infertility	Eubacteriumfissicatenagroup	rs11818408	G	A	0.10585	0.0237114	8.2e-06	0.0212429	0.0154792	0.169954	0.00552041	19.9172
Female infertility	Eubacteriumfissicatenagroup	rs10147907	T	G	0.172263	0.039601	8.27e-06	0.0280501	0.0287114	0.328586	0.0049124	18.9123
Female infertility	Eubacteriumfissicatenagroup	rs1768152	T	C	0.139489	0.0316186	8.7e-06	0.0111319	0.024877	0.654531	0.005392	19.4514
Female infertility	Eubacteriumfissicatenagroup	rs6934739	A	G	0.111463	0.0252788	9.75e-06	-0.00359207	0.0160606	0.823025	0.00504941	19.4323
Female infertility	Eubacteriumeligensgroup	rs4583233	A	C	0.0670205	0.0128122	2.84e-07	-0.00803232	0.0167855	0.632275	0.00190627	27.3595
Female infertility	Eubacteriumeligensgroup	rs265534	T	G	-0.0563756	0.0120127	2.27e-06	-0.0142105	0.0151703	0.348899	0.00148832	22.0212
Female infertility	Eubacteriumeligensgroup	rs6923695	T	G	0.103268	0.0229524	4.87e-06	-0.011558	0.0304929	0.704659	0.00156784	20.2396
Female infertility	Eubacteriumeligensgroup	rs2200429	A	G	-0.0888825	0.0198479	5.3e-06	-0.0303466	0.0253298	0.230895	0.00135674	20.0514
Female infertility	Eubacteriumeligensgroup	rs182318	G	A	-0.0824941	0.0195615	8.4e-06	0.030517	0.027552	0.268029	0.00120208	17.7821
Female infertility	Eubacteriumeligensgroup	rs56080211	C	T	0.123093	0.0282743	9.14e-06	0.0377694	0.028517	0.185352	0.00176835	18.9496
Female infertility	Eubacteriumcoprostanoligenesgroup	rs17159861	C	T	0.0962228	0.0168388	1.04e-08	-0.0259583	0.024555	0.290443	0.00187528	32.6499
Female infertility	Eubacteriumcoprostanoligenesgroup	rs9648214	T	C	-0.0828719	0.016431	2.52e-07	0.00651284	0.0269689	0.809172	0.0014616	25.4354
Female infertility	Eubacteriumcoprostanoligenesgroup	rs4076415	T	G	0.0515152	0.0110294	1.99e-06	0.0261665	0.0157618	0.0968902	0.00128464	21.8129
Female infertility	Eubacteriumcoprostanoligenesgroup	rs6762473	C	A	0.0521584	0.0112353	4.26e-06	0.00503197	0.0158868	0.751441	0.00123871	21.5493
Female infertility	Eubacteriumcoprostanoligenesgroup	rs12906958	C	T	-0.0533159	0.0115935	4.35e-06	0.0154405	0.016568	0.351362	0.00121537	21.1464
Female infertility	Eubacteriumcoprostanoligenesgroup	rs76898927	G	A	0.123055	0.0266375	4.79e-06	0.0101723	0.0333831	0.760584	0.00174663	21.3374
Female infertility	Eubacteriumcoprostanoligenesgroup	rs10444197	A	G	-0.0505823	0.0113455	5.98e-06	-0.00641679	0.0158878	0.6863	0.00114236	19.8745
Female infertility	Eubacteriumcoprostanoligenesgroup	rs62024432	C	T	-0.0769698	0.0172101	7.5e-06	-0.0134693	0.0257863	0.601431	0.00115678	19.9996
Female infertility	Eubacteriumcoprostanoligenesgroup	rs79895140	T	C	-0.0641017	0.0141153	8.62e-06	-0.022074	0.0242347	0.362379	0.00127623	20.6208
Female infertility	Eubacteriumcoprostanoligenesgroup	rs1020520	T	G	-0.0590705	0.0132929	8.89e-06	-0.0149709	0.0210591	0.477147	0.00113549	19.7448
Female infertility	Eubacteriumcoprostanoligenesgroup	rs11720857	C	T	0.0630776	0.0144485	9.26e-06	-0.0103962	0.0198916	0.601222	0.00112251	19.057
Female infertility	Eubacteriumcoprostanoligenesgroup	rs11052069	T	C	0.0477832	0.0107833	9.38e-06	-0.0111245	0.0152602	0.466008	0.00112851	19.6333
Female infertility	Eubacteriumcoprostanoligenesgroup	rs2644213	G	A	0.0538845	0.0121245	9.86e-06	0.0256176	0.0165018	0.120563	0.00113517	19.7494
Female infertility	Eubacteriumbrachygroup	rs112617308	T	C	-0.170873	0.0362844	2.38e-06	0.0388255	0.0262319	0.138849	0.00551239	22.1662
Female infertility	Eubacteriumbrachygroup	rs4862235	G	A	0.104806	0.0225751	3.73e-06	-0.0284889	0.0151628	0.0602643	0.00535945	21.5425
Female infertility	Eubacteriumbrachygroup	rs62348779	T	C	-0.201481	0.043286	3.78e-06	-0.0425161	0.0286106	0.137272	0.00562938	21.6543
Female infertility	Eubacteriumbrachygroup	rs2913110	C	T	0.105143	0.022942	4.56e-06	-0.034858	0.0158098	0.0274657	0.00522224	20.9934
Female infertility	Eubacteriumbrachygroup	rs1384962	A	G	0.120888	0.0266264	6.99e-06	0.0357484	0.0162306	0.027628	0.00512557	20.6028
Female infertility	Eubacteriumbrachygroup	rs720439	A	G	-0.111927	0.0251252	7.03e-06	-0.00954136	0.0176632	0.58907	0.00493551	19.835
Female infertility	Eubacteriumbrachygroup	rs6591893	G	A	0.108225	0.0240319	7.34e-06	-0.0170067	0.0159008	0.28482	0.00504586	20.2706
Female infertility	Eubacteriumbrachygroup	rs13139592	T	C	-0.145997	0.0327192	7.97e-06	-0.00476907	0.0223236	0.830833	0.00515558	19.9
Female infertility	Eubacteriumbrachygroup	rs73199919	T	C	-0.236717	0.0531335	8.16e-06	-0.0152369	0.0351393	0.664569	0.00655522	19.835
Female infertility	Eubacteriumbrachygroup	rs12151423	A	G	0.101329	0.0227324	9.27e-06	-0.0180813	0.0150995	0.23112	0.00512893	19.8585
Female infertility	Clostridiuminnocuumgroup	rs6890185	T	C	0.113424	0.0233137	1.12e-06	0.0198814	0.01611	0.217166	0.00564942	23.6579
Female infertility	Clostridiuminnocuumgroup	rs1942371	G	A	-0.157938	0.034187	4.06e-06	0.00259328	0.0232335	0.911126	0.00534594	21.3321
Female infertility	Clostridiuminnocuumgroup	rs61267978	T	C	0.14708	0.0320875	5.59e-06	0.0270451	0.0231497	0.242698	0.00501918	21.0002
Female infertility	Clostridiuminnocuumgroup	rs4869133	G	A	-0.180591	0.0409505	7.24e-06	-0.0504975	0.0199475	0.0113569	0.00517994	19.4374
Female infertility	Clostridiuminnocuumgroup	rs6577484	G	A	0.160425	0.0360857	8.41e-06	0.0145074	0.0251555	0.564136	0.00509671	19.7536
Female infertility	Clostridiuminnocuumgroup	rs40656	C	T	0.142664	0.0311021	8.62e-06	-0.00227169	0.018897	0.904313	0.00517082	21.0299
Female infertility	Clostridiuminnocuumgroup	rs10506058	A	G	0.0997048	0.0221926	8.92e-06	-0.0104278	0.0153117	0.495851	0.00482514	20.1748
Female infertility	CandidatusSoleaferrea	rs10090365	A	G	0.112199	0.0231856	1.37e-06	0.0166302	0.0151086	0.271023	0.00344697	21.248
Female infertility	CandidatusSoleaferrea	rs10809135	T	C	-0.092834	0.0199807	3.64e-06	0.028477	0.015395	0.0643487	0.00347903	20.9366
Female infertility	CandidatusSoleaferrea	rs36155147	C	T	-0.0834413	0.0180989	4.17e-06	0.0136974	0.0162439	0.399097	0.00317395	18.9642
Female infertility	CandidatusSoleaferrea	rs4678258	T	C	0.104966	0.0240995	5.41e-06	0.0126855	0.0177384	0.474519	0.00341588	20.9049
Female infertility	CandidatusSoleaferrea	rs61825792	T	C	0.0986136	0.0215646	5.53e-06	-0.0100058	0.0207137	0.62906	0.00379638	23.41
Female infertility	CandidatusSoleaferrea	rs6489992	A	G	-0.0969304	0.0214221	5.8e-06	-0.0125969	0.0156534	0.420968	0.0032768	20.1857
Female infertility	CandidatusSoleaferrea	rs6494306	A	G	0.0892075	0.0195401	5.95e-06	-0.00401779	0.0161158	0.803123	0.0033207	20.467
Female infertility	CandidatusSoleaferrea	rs7400877	T	C	-0.0840437	0.0187031	7.89e-06	-0.0169969	0.0184791	0.357681	0.00324017	19.9691
Female infertility	CandidatusSoleaferrea	rs9973954	A	G	-0.0951085	0.0212799	9.29e-06	0.00808364	0.0158283	0.609555	0.0033803	20.8356
Notes: Beta: estimate coefficient; P-value: P-value from GWAS ; SE: standard error of coefficient estimate.

## Sheet: Supplementary Table 2B
Supplementary Table 2B. MR analysis of all gut microbiome in female infertility.(P<1e-5)
Trait	Bacterial genera	NO.SNP	Methods	OR	95% CI	Beta	Se	P-value	Cochran’s Q	Q_P-value	Egger_intercept	Se	P-value	MR-PRESSO
Female infertility	Ruminococcustorquesgroup	7	MR Egger	1.15062	0.56-2.35	0.140301	0.364003	0.715764	1.99252	0.850179	-0.0368604	0.0244335	0.191773	0.211
			IVW	0.685238	0.54-0.88	-0.377989	0.120279	0.0016746	4.2684	0.640405
			Weighted median	0.802704	0.59-1.10	-0.21977	0.159387	0.167944
			Weighted mode	0.858918	0.54-1.36	-0.152082	0.235058	0.541578
Female infertility	Coprococcus2	8	MR Egger	1.09266	0.28-4.27	0.0886139	0.695014	0.902711	5.01187	0.542292	0.00672747	0.0498123	0.896984	0.07
			IVW	1.19928	1.01-1.43	0.18172	0.0882366	0.0394493	5.03011	0.656289
			Weighted median	1.1534	0.91-1.45	0.142713	0.116861	0.222004
			Weighted mode	1.15001	0.79-1.68	0.139768	0.192804	0.492014
Female infertility	Victivallis	10	MR Egger	1.47426	0.77-2.83	0.388156	0.331882	0.275841	6.90531	0.546882	-0.0477236	0.0433344	0.3028	0.186
			IVW	1.02614	0.94-1.12	0.0258057	0.0434559	0.55262	8.11815	0.522285
			Weighted median	0.974157	0.87-1.09	-0.0261828	0.0593575	0.659139
			Weighted mode	0.943159	0.80-1.11	-0.0585206	0.0842916	0.505041
Female infertility	Veillonella	6	MR Egger	0.629654	0.15-2.59	-0.462585	0.720937	0.556026	1.61154	0.806717	0.0423607	0.054742	0.482226	0.947
			IVW	1.09509	0.92-1.31	0.0908383	0.0909365	0.317833	2.21034	0.81934
			Weighted median	1.09146	0.88-1.35	0.0875174	0.10996	0.426089
			Weighted mode	1.05216	0.76-1.46	0.0508429	0.166005	0.771739
Female infertility	Tyzzerella3	11	MR Egger	1.25311	0.65-2.41	0.225628	0.333699	0.515947	7.89795	0.544462	-0.0312649	0.0459712	0.513554	0.62
			IVW	1.00129	0.91-1.11	0.00128864	0.0504502	0.979622	8.36048	0.59367
			Weighted median	0.997024	0.87-1.14	-0.00298022	0.0695344	0.965813
			Weighted mode	1.03645	0.84-1.27	0.0357968	0.104817	0.739782
Female infertility	Turicibacter	9	MR Egger	0.574329	0.33-1.01	-0.554553	0.285875	0.0935562	6.61814	0.469691	0.0599564	0.0297866	0.0840096	0.323
			IVW	1.00313	0.86-1.18	0.00312654	0.0813641	0.969348	10.6698	0.221121
			Weighted median	1.11659	0.91-1.37	0.110281	0.102977	0.2842
			Weighted mode	1.16836	0.84-1.62	0.1556	0.167112	0.379038
Female infertility	Terrisporobacter	5	MR Egger	1.6119	0.83-3.13	0.477416	0.339394	0.25422	5.08174	0.165909	-0.0525405	0.0336244	0.21609	0.102
			IVW	0.977509	0.76-1.27	-0.0227482	0.1316	0.862763	9.21765	0.0558837
			Weighted median	0.866252	0.68-1.10	-0.143579	0.121311	0.236585
			Weighted mode	0.782192	0.50-1.23	-0.245656	0.230945	0.347417
Female infertility	Sutterella	12	MR Egger	1.16977	0.61-2.24	0.156808	0.332156	0.646995	10.46	0.401101	-0.0105249	0.0222197	0.645903	0.496
			IVW	1.00374	0.87-1.16	0.00373527	0.0750795	0.960321	10.6947	0.469181
			Weighted median	1.01067	0.82-1.24	0.0106149	0.104638	0.919198
			Weighted mode	1.06027	0.76-1.47	0.0585267	0.166929	0.732504
Female infertility	Subdoligranulum	10	MR Egger	1.14062	0.63-2.07	0.131569	0.303295	0.675896	15.1624	0.0560644	-0.00442857	0.0232234	0.853516	0.889
			IVW	1.08135	0.87-1.34	0.0782137	0.110617	0.479523	15.2313	0.084776
			Weighted median	0.94609	0.74-1.21	-0.0554175	0.124704	0.65676
			Weighted mode	0.894334	0.64-1.24	-0.111676	0.168421	0.523899
Female infertility	Streptococcus	12	MR Egger	0.902597	0.45-1.82	-0.102479	0.358753	0.780974	13.0175	0.222695	0.00782629	0.0285721	0.789725	0.301
			IVW	0.992179	0.83-1.19	-0.00785126	0.092583	0.932418	13.1152	0.285864
			Weighted median	1.05489	0.82-1.36	0.0534394	0.128384	0.677231
			Weighted mode	1.20013	0.70-2.05	0.182432	0.272699	0.517298
Female infertility	Slackia	6	MR Egger	0.630898	0.24-1.67	-0.460611	0.496217	0.405822	2.43163	0.656919	0.0451249	0.0493523	0.412267	0.724
			IVW	0.987799	0.85-1.15	-0.0122758	0.0761735	0.87197	3.26765	0.658798
			Weighted median	0.973497	0.81-1.17	-0.0268607	0.0954832	0.77847
			Weighted mode	0.973818	0.75-1.27	-0.0265306	0.135567	0.852549
Female infertility	Senegalimassilia	5	MR Egger	1.14375	0.57-2.28	0.13431	0.352656	0.728682	0.376076	0.945139	-0.0109056	0.0318676	0.754761	0.752
			IVW	1.01796	0.85-1.22	0.0178044	0.0919911	0.846532	0.493187	0.974161
			Weighted median	1.01746	0.82-1.26	0.0173091	0.108192	0.872892
			Weighted mode	1.01207	0.78-1.32	0.0119932	0.134593	0.93328
Female infertility	Sellimonas	9	MR Egger	0.971509	0.55-1.72	-0.0289047	0.290937	0.923645	10.2018	0.177423	0.00413003	0.042005	0.924432	0.313
			IVW	0.999279	0.91-1.09	-0.000720947	0.0465984	0.987656	10.2159	0.250199
			Weighted median	0.981152	0.88-1.10	-0.0190283	0.0582203	0.743795
			Weighted mode	0.918453	0.75-1.13	-0.085064	0.105703	0.444221
Female infertility	Ruminococcus2	15	MR Egger	0.956848	0.70-1.32	-0.044111	0.162349	0.790116	14.538	0.337077	0.0122823	0.0129508	0.360235	0.312
			IVW	1.10074	0.97-1.26	0.0959816	0.067112	0.152668	15.5438	0.342021
			Weighted median	1.13506	0.95-1.36	0.126682	0.0921026	0.168993
			Weighted mode	1.15844	0.91-1.47	0.147072	0.122552	0.250023
Female infertility	Romboutsia	13	MR Egger	1.1047	0.73-1.67	0.0995729	0.211841	0.64751	7.68131	0.741535	-0.00591325	0.0173795	0.740083	0.846
			IVW	1.03244	0.89-1.19	0.0319239	0.0731076	0.662351	7.79708	0.80078
			Weighted median	0.994168	0.83-1.19	-0.00584944	0.0935757	0.950157
			Weighted mode	0.967242	0.71-1.32	-0.0333061	0.159392	0.837987
Female infertility	Ruminococcus1	10	MR Egger	1.09543	0.61-1.96	0.0911453	0.297997	0.767519	14.5676	0.0681193	-0.00749955	0.0230386	0.753138	0.183
			IVW	1.00123	0.81-1.23	0.00122758	0.106108	0.990769	14.7605	0.097727
			Weighted median	1.05777	0.84-1.33	0.0561668	0.118171	0.634572
			Weighted mode	1.23534	0.83-1.84	0.211348	0.202099	0.322944
Female infertility	RuminococcaceaeUCG009	12	MR Egger	0.767096	0.48-1.23	-0.265143	0.241906	0.298747	11.8178	0.297434	0.0258371	0.0236337	0.299928	0.383
			IVW	0.990961	0.88-1.12	-0.00907975	0.061005	0.881683	13.2302	0.278544
			Weighted median	0.965531	0.82-1.13	-0.035077	0.0823936	0.670308
			Weighted mode	0.979241	0.72-1.34	-0.0209775	0.159851	0.897961
Female infertility	RuminococcaceaeUCG014	10	MR Egger	0.837773	0.55-1.28	-0.177009	0.214355	0.432868	11.6275	0.168616	0.00777926	0.0180614	0.678048	0.261
			IVW	0.910699	0.77-1.08	-0.0935433	0.0873831	0.284396	11.8971	0.219173
			Weighted median	0.925861	0.75-1.14	-0.0770311	0.107945	0.475464
			Weighted mode	0.934114	0.74-1.18	-0.0681566	0.12039	0.585143
Female infertility	RuminococcaceaeUCG013	11	MR Egger	0.839569	0.52-1.34	-0.174867	0.239672	0.484186	6.84885	0.652852	0.0167164	0.0183502	0.386062	0.461
			IVW	1.03035	0.88-1.21	0.0299012	0.0831638	0.719187	7.67871	0.660187
			Weighted median	0.996042	0.80-1.24	-0.00396619	0.110688	0.971416
			Weighted mode	0.969804	0.69-1.35	-0.0306617	0.170003	0.860473
Female infertility	RuminococcaceaeUCG011	8	MR Egger	0.994737	0.59-1.68	-0.00527697	0.266805	0.984862	7.79376	0.253606	0.00859665	0.0353197	0.815807	0.356
			IVW	1.06009	0.96-1.17	0.0583512	0.0496271	0.239678	7.87071	0.344133
			Weighted median	1.07349	0.95-1.22	0.0709155	0.064584	0.272189
			Weighted mode	1.1091	0.93-1.33	0.103549	0.0913113	0.294125
Female infertility	RuminococcaceaeUCG010	6	MR Egger	0.864971	0.36-2.05	-0.14506	0.440975	0.758695	11.0215	0.0263228	0.00255188	0.0313047	0.938946	0.122
			IVW	0.894424	0.68-1.19	-0.111575	0.143593	0.437147	11.0399	0.0505953
			Weighted median	0.905261	0.69-1.19	-0.0995322	0.141196	0.480859
			Weighted mode	0.904525	0.64-1.27	-0.100345	0.173234	0.587541
Female infertility	RuminococcaceaeUCG005	14	MR Egger	1.02574	0.71-1.47	0.0254172	0.184894	0.89294	11.9174	0.452336	-0.0075613	0.0155521	0.635589	0.258
			IVW	0.943531	0.83-1.08	-0.0581259	0.0682606	0.394475	12.1538	0.515076
			Weighted median	0.929554	0.77-1.13	-0.0730507	0.0984429	0.45805
			Weighted mode	0.916616	0.71-1.18	-0.0870669	0.129133	0.51197
Female infertility	RuminococcaceaeUCG004	11	MR Egger	1.505	0.73-3.12	0.408795	0.371504	0.299726	5.9186	0.748037	-0.034839	0.0311655	0.292572	0.785
			IVW	1.00028	0.88-1.14	0.000275773	0.0668276	0.996707	7.16824	0.709472
			Weighted median	1.06944	0.90-1.27	0.0671365	0.0881251	0.446161
			Weighted mode	1.10149	0.85-1.44	0.0966658	0.134996	0.490335
Female infertility	RuminococcaceaeUCG003	12	MR Egger	1.07554	0.62-1.87	0.0728262	0.280843	0.800654	13.6308	0.190506	0.00341371	0.0207689	0.872717	0.31
			IVW	1.12386	0.96-1.32	0.116769	0.0821217	0.155054	13.6677	0.251932
			Weighted median	1.02677	0.83-1.26	0.0264172	0.106217	0.803586
			Weighted mode	0.986795	0.73-1.34	-0.0132926	0.155857	0.933566
Female infertility	RuminococcaceaeUCG002	19	MR Egger	0.988796	0.73-1.34	-0.011267	0.155454	0.943067	15.3455	0.570608	-0.00512715	0.011955	0.673403	0.628
			IVW	0.929988	0.83-1.05	-0.0725841	0.0610277	0.234296	15.5295	0.625349
			Weighted median	0.94209	0.80-1.11	-0.059654	0.0841467	0.478369
			Weighted mode	0.931346	0.75-1.15	-0.0711246	0.107596	0.516963
Female infertility	RuminococcaceaeNK4A214group	13	MR Egger	0.640324	0.39-1.04	-0.445782	0.248895	0.100811	9.32287	0.592117	0.0230746	0.0182069	0.231202	0.19
			IVW	0.864726	0.75-1.00	-0.145342	0.0758373	0.0553012	10.9291	0.535008
			Weighted median	0.921078	0.75-1.14	-0.0822106	0.107186	0.443089
			Weighted mode	1.05395	0.71-1.57	0.0525428	0.203896	0.801009
Female infertility	Ruminiclostridium9	7	MR Egger	1.47504	0.53-4.07	0.388687	0.518078	0.486887	3.66869	0.598031	-0.0314655	0.0337747	0.39429	0.465
			IVW	0.921131	0.74-1.15	-0.0821527	0.11394	0.470898	4.53662	0.604459
			Weighted median	0.948474	0.70-1.28	-0.0529013	0.153595	0.73053
			Weighted mode	0.913854	0.58-1.43	-0.0900841	0.228852	0.707459
Female infertility	Ruminiclostridium6	14	MR Egger	0.829859	0.50-1.38	-0.186499	0.258008	0.483627	26.6105	0.0087884	0.0185883	0.0221094	0.41693	0.011
			IVW	1.01103	0.82-1.24	0.0109735	0.10556	0.917205	28.178	0.00854633
			Weighted median	1.02701	0.83-1.27	0.0266548	0.110113	0.808728
			Weighted mode	1.14107	0.78-1.67	0.131968	0.193377	0.50694
Female infertility	Ruminiclostridium5	11	MR Egger	0.605686	0.29-1.26	-0.501393	0.374868	0.213869	7.61581	0.573278	0.0386636	0.0235965	0.135734	0.555
			IVW	1.09968	0.92-1.31	0.0950178	0.0909866	0.296344	10.3006	0.414528
			Weighted median	1.06266	0.82-1.37	0.060772	0.129158	0.637981
			Weighted mode	0.977033	0.61-1.57	-0.0232345	0.241407	0.925227
Female infertility	Roseburia	12	MR Egger	0.769025	0.42-1.41	-0.262632	0.310633	0.417616	14.8003	0.139516	0.0248097	0.0218921	0.283538	0.132
			IVW	1.07073	0.87-1.32	0.0683399	0.107188	0.523753	16.7011	0.117034
			Weighted median	1.06826	0.83-1.37	0.0660284	0.12635	0.601265
			Weighted mode	1.12692	0.76-1.67	0.119488	0.199892	0.562102
Female infertility	RikenellaceaeRC9gutgroup	11	MR Egger	0.757284	0.40-1.44	-0.278017	0.327726	0.418249	15.1185	0.0877313	0.0312032	0.045492	0.510055	0.188
			IVW	0.945405	0.86-1.05	-0.0561422	0.0511856	0.272714	15.9088	0.102272
			Weighted median	0.933046	0.83-1.05	-0.0693005	0.0596028	0.244949
			Weighted mode	0.920324	0.77-1.10	-0.0830296	0.0931222	0.393545
Female infertility	Prevotella9	15	MR Egger	0.640626	0.47-0.88	-0.44531	0.159542	0.0152856	7.7351	0.860419	0.0440216	0.0156428	0.0146275	0.412
			IVW	0.976877	0.87-1.09	-0.0233942	0.0576858	0.685077	15.6546	0.334917
			Weighted median	0.957003	0.82-1.12	-0.043949	0.078847	0.577257
			Weighted mode	0.832807	0.64-1.09	-0.182953	0.138268	0.206981
Female infertility	Prevotella7	11	MR Egger	1.08496	0.63-1.87	0.0815469	0.277686	0.775672	11.5516	0.239786	-0.0145428	0.0387406	0.716065	0.376
			IVW	0.979085	0.90-1.07	-0.0211365	0.0457149	0.643828	11.7324	0.303363
			Weighted median	0.954694	0.85-1.07	-0.0463641	0.0595205	0.436003
			Weighted mode	0.886388	0.71-1.11	-0.1206	0.112602	0.309322
Female infertility	Phascolarctobacterium	8	MR Egger	0.683953	0.32-1.48	-0.379865	0.392499	0.370514	3.31212	0.768775	0.0379708	0.0341459	0.308692	0.794
			IVW	1.04748	0.89-1.24	0.0463869	0.0844092	0.582629	4.5487	0.714846
			Weighted median	1.06749	0.86-1.33	0.0653084	0.111764	0.558989
			Weighted mode	1.06585	0.78-1.45	0.063768	0.157443	0.697551
Female infertility	Peptococcus	12	MR Egger	1.47903	1.04-2.11	0.391386	0.18139	0.0563275	7.85024	0.643462	-0.0500068	0.0236925	0.0609743	0.411
			IVW	1.02194	0.93-1.13	0.0217008	0.0498829	0.663537	12.3051	0.34115
			Weighted median	1.03734	0.92-1.18	0.0366606	0.0640138	0.566849
			Weighted mode	1.05864	0.86-1.30	0.0569871	0.105968	0.601441
Female infertility	Parasutterella	14	MR Egger	0.911182	0.66-1.26	-0.0930125	0.16363	0.580224	8.57681	0.738588	0.00527743	0.0133178	0.698863	0.636
			IVW	0.967977	0.86-1.09	-0.0325471	0.0590932	0.581787	8.73384	0.792735
			Weighted median	1.01456	0.86-1.19	0.0144575	0.0826293	0.861105
			Weighted mode	1.0211	0.82-1.27	0.0208793	0.11148	0.854324
Female infertility	Paraprevotella	13	MR Egger	0.995093	0.69-1.44	-0.00491935	0.187556	0.979545	6.77716	0.816832	0.00283916	0.0199259	0.889273	0.856
			IVW	1.02107	0.93-1.13	0.0208517	0.0496387	0.674434	6.79746	0.870703
			Weighted median	1.00676	0.89-1.14	0.00674018	0.0642327	0.916428
			Weighted mode	0.993192	0.80-1.23	-0.00683098	0.10897	0.951048
Female infertility	Parabacteroides	5	MR Egger	1.91184	0.36-10.04	0.648067	0.846183	0.499497	3.52497	0.317538	-0.0631754	0.0733197	0.45225	0.596
			IVW	0.930925	0.72-1.20	-0.0715766	0.131457	0.586106	4.39732	0.354897
			Weighted median	0.884475	0.63-1.23	-0.122761	0.169447	0.46877
			Weighted mode	0.863998	0.50-1.49	-0.146185	0.276915	0.625493
Female infertility	Oxalobacter	11	MR Egger	0.777956	0.48-1.26	-0.251085	0.24494	0.332083	12.249	0.199635	0.0417586	0.0364932	0.282025	0.244
			IVW	1.02306	0.92-1.13	0.0228001	0.0528246	0.666018	14.031	0.17158
			Weighted median	1.0741	0.94-1.22	0.0714868	0.0659191	0.27816
			Weighted mode	1.08093	0.89-1.31	0.0778234	0.0963382	0.437991
Female infertility	Oscillospira	8	MR Egger	1.83706	0.95-3.55	0.608168	0.336221	0.120469	3.82414	0.700461	-0.0562734	0.0323186	0.132289	0.562
			IVW	1.04015	0.89-1.22	0.0393696	0.0795718	0.620764	6.85594	0.444032
			Weighted median	1.03485	0.84-1.27	0.0342584	0.105613	0.745653
			Weighted mode	1.0265	0.74-1.43	0.0261591	0.167637	0.880401
Female infertility	Oscillibacter	13	MR Egger	0.838235	0.54-1.30	-0.176457	0.221955	0.443422	11.1424	0.43141	0.0236336	0.0207776	0.279518	0.371
			IVW	1.06953	0.95-1.20	0.0672189	0.0587582	0.252628	12.453	0.410019
			Weighted median	1.05107	0.9-1.23	0.0498045	0.0795789	0.531413
			Weighted mode	1.03445	0.78-1.37	0.0338744	0.14223	0.815771
Female infertility	Olsenella	10	MR Egger	1.01662	0.76-1.36	0.0164873	0.14807	0.914084	9.37955	0.311296	0.000403751	0.0200829	0.984453	0.443
			IVW	1.0195	0.94-1.11	0.0193155	0.0435595	0.657456	9.38002	0.40296
			Weighted median	1.05499	0.94-1.19	0.0535266	0.0606458	0.377447
			Weighted mode	1.07776	0.91-1.27	0.0748803	0.0836612	0.394072
Female infertility	Odoribacter	7	MR Egger	0.717663	0.38-1.37	-0.331754	0.329987	0.36087	5.44387	0.36414	0.022549	0.0243943	0.39772	0.44
			IVW	0.95821	0.78-1.17	-0.0426884	0.104052	0.681615	6.37415	0.382608
			Weighted median	0.930756	0.72-1.20	-0.0717586	0.129971	0.580871
			Weighted mode	0.855814	0.60-1.23	-0.155702	0.184467	0.430994
Female infertility	Methanobrevibacter	6	MR Egger	0.972082	0.62-1.52	-0.0283154	0.227829	0.907086	1.62355	0.804553	-0.0102321	0.0325377	0.768884	0.936
			IVW	0.907215	0.81-1.02	-0.0973759	0.0606434	0.108337	1.72244	0.886061
			Weighted median	0.935249	0.80-1.09	-0.0669423	0.079764	0.401327
			Weighted mode	0.942993	0.78-1.14	-0.0586969	0.0989606	0.578901
Female infertility	Marvinbryantia	10	MR Egger	0.691906	0.37-1.29	-0.368305	0.318445	0.280813	5.65247	0.686095	0.0332683	0.0274097	0.25946	0.745
			IVW	1.00541	0.86-1.18	0.00539213	0.0813131	0.947128	7.12565	0.62404
			Weighted median	1.06226	0.86-1.31	0.0603962	0.108755	0.578661
			Weighted mode	1.05443	0.80-1.39	0.0529961	0.140364	0.714505
Female infertility	Lactococcus	9	MR Egger	0.906521	0.59-1.40	-0.0981413	0.22321	0.673423	3.17565	0.868291	0.00196838	0.0294504	0.94858	0.942
			IVW	0.919802	0.83-1.01	-0.0835973	0.0497165	0.0926701	3.18012	0.92255
			Weighted median	0.918628	0.81-1.04	-0.0848741	0.0625867	0.175066
			Weighted mode	0.912756	0.76-1.09	-0.091287	0.0923229	0.35173
Female infertility	Lactobacillus	8	MR Egger	1.06995	0.68-1.69	0.0676125	0.231868	0.780412	14.4873	0.0246416	-0.00510419	0.0268765	0.85564	0.087
			IVW	1.02742	0.87-1.21	0.0270481	0.08378	0.746811	14.5744	0.0418584
			Weighted median	1.03772	0.89-1.21	0.0370231	0.0801169	0.644
			Weighted mode	1.00152	0.82-1.22	0.00152077	0.0990765	0.988182
Female infertility	LachnospiraceaeUCG010	10	MR Egger	0.726006	0.41-1.27	-0.320198	0.287151	0.297188	9.89476	0.27249	0.0280156	0.0220082	0.238777	0.392
			IVW	1.02523	0.85-1.24	0.0249169	0.0978328	0.798964	11.899	0.219065
			Weighted median	1.16147	0.91-1.49	0.14969	0.125539	0.233111
			Weighted mode	1.30531	0.84-2.03	0.266438	0.225661	0.267984
Female infertility	LachnospiraceaeUCG008	10	MR Egger	0.691041	0.33-1.43	-0.369556	0.371692	0.349217	13.155	0.106626	0.0344325	0.0386128	0.398561	0.128
			IVW	0.956383	0.83-1.10	-0.0445972	0.0723706	0.53774	14.4626	0.106794
			Weighted median	0.938169	0.79-1.11	-0.0638249	0.0847354	0.451314
			Weighted mode	0.949529	0.75-1.21	-0.0517894	0.121689	0.680405
Female infertility	LachnospiraceaeUCG004	12	MR Egger	1.2563	0.55-2.87	0.22817	0.421232	0.599904	15.3106	0.12114	-0.0149267	0.0270255	0.592859	0.231
			IVW	1.00231	0.83-1.21	0.00231016	0.0978135	0.981157	15.7777	0.149586
			Weighted median	0.99704	0.78-1.28	-0.00296477	0.125872	0.981208
			Weighted mode	0.989075	0.62-1.57	-0.0109856	0.235048	0.96356
Female infertility	LachnospiraceaeUCG001	12	MR Egger	1.23938	0.73-2.12	0.214608	0.273534	0.450888	11.0853	0.350912	-0.0192474	0.0249727	0.458684	0.31
			IVW	1.0101	0.89-1.15	0.010048	0.0649463	0.877048	11.7438	0.383206
			Weighted median	0.995897	0.84-1.18	-0.00411118	0.0868958	0.962265
			Weighted mode	0.990902	0.76-1.29	-0.0091392	0.1344	0.947006
Female infertility	LachnospiraceaeNK4A136group	15	MR Egger	0.930898	0.69-1.26	-0.0716051	0.156121	0.654058	19.0326	0.122096	-0.00143709	0.0116032	0.903326	0.124
			IVW	0.915452	0.79-1.06	-0.0883379	0.0754375	0.241595	19.0551	0.162856
			Weighted median	0.856902	0.71-1.04	-0.154431	0.0978129	0.114372
			Weighted mode	0.842768	0.68-1.04	-0.171063	0.109293	0.139858
Female infertility	LachnospiraceaeND3007group	3	MR Egger	3.5197	0.01-2194.36	1.25838	3.2833	0.766999	1.31072	0.252264	-0.0579279	0.192996	0.814365	/
			IVW	1.31605	0.94-1.84	0.274634	0.170388	0.107002	1.42881	0.489484
			Weighted median	1.3443	0.88-2.06	0.295877	0.216772	0.172277
			Weighted mode	1.44527	0.85-2.47	0.368295	0.273295	0.310146
Female infertility	LachnospiraceaeNC2004group	9	MR Egger	0.621765	0.37-1.04	-0.475193	0.262504	0.113176	8.09295	0.324469	0.0536798	0.0302415	0.119156	0.261
			IVW	0.976699	0.85-1.13	-0.0235771	0.0727901	0.746009	11.7357	0.163393
			Weighted median	0.934091	0.79-1.10	-0.0681817	0.0825225	0.408679
			Weighted mode	0.912041	0.71-1.17	-0.0920698	0.125062	0.482639
Female infertility	LachnospiraceaeFCS020group	12	MR Egger	1.0604	0.73-1.55	0.0586484	0.192747	0.767155	4.62707	0.914659	-0.00329575	0.0142579	0.821858	0.814
			IVW	1.01753	0.88-1.17	0.0173821	0.0726665	0.810947	4.68051	0.945647
			Weighted median	1.00856	0.84-1.21	0.00852394	0.0912209	0.925552
			Weighted mode	0.990219	0.76-1.30	-0.00982954	0.138368	0.944642
Female infertility	Lachnospira	6	MR Egger	0.537674	0.12-2.32	-0.620503	0.745479	0.452017	3.02388	0.553837	0.036118	0.0444182	0.461769	0.69
			IVW	0.97717	0.76-1.25	-0.0230943	0.126318	0.854934	3.68507	0.595588
			Weighted median	0.93695	0.68-1.29	-0.065125	0.163324	0.69008
			Weighted mode	0.805245	0.50-1.30	-0.216609	0.243647	0.414708
Female infertility	Lachnoclostridium	13	MR Egger	0.622686	0.33-1.19	-0.473712	0.330978	0.18015	15.582	0.157373	0.026259	0.0221924	0.261655	0.16
			IVW	0.905365	0.75-1.10	-0.0994172	0.0989825	0.31519	17.5652	0.129544
			Weighted median	0.973389	0.76-1.24	-0.0269719	0.123842	0.827591
			Weighted mode	1.16466	0.77-1.77	0.152426	0.212389	0.486695
Female infertility	Intestinimonas	16	MR Egger	0.80187	0.56-1.15	-0.220809	0.181998	0.245109	16.3904	0.290116	0.022758	0.0156234	0.167272	0.261
			IVW	1.02683	0.90-1.17	0.0264732	0.0680209	0.697134	18.8746	0.219473
			Weighted median	1.00113	0.84-1.19	0.00112935	0.0901273	0.990002
			Weighted mode	0.967448	0.73-1.29	-0.0330932	0.145402	0.823032
Female infertility	Intestinibacter	15	MR Egger	1.33469	0.84-2.13	0.288696	0.238699	0.248023	17.4213	0.180755	-0.0285056	0.0190609	0.15866	0.128
			IVW	0.9503	0.82-1.10	-0.0509776	0.0765834	0.505636	20.4184	0.117492
			Weighted median	0.893459	0.74-1.08	-0.112655	0.095575	0.238513
			Weighted mode	0.830729	0.63-1.10	-0.185451	0.14179	0.211967
Female infertility	Hungatella	5	MR Egger	1.396	0.53-3.64	0.333608	0.489636	0.544539	4.382	0.22306	-0.0453467	0.0633848	0.526003	0.31
			IVW	0.988196	0.85-1.15	-0.011874	0.0757913	0.875507	5.12961	0.274255
			Weighted median	1.03238	0.87-1.22	0.0318711	0.0869801	0.714053
			Weighted mode	1.08997	0.85-1.39	0.0861486	0.123982	0.525402
Female infertility	Howardella	9	MR Egger	1.47607	1.05-2.07	0.389383	0.173139	0.0592883	4.00077	0.779689	-0.0709133	0.0268718	0.0334745	0.287
			IVW	0.948589	0.86-1.05	-0.0527795	0.0510724	0.301405	10.9648	0.2037
			Weighted median	0.979167	0.87-1.11	-0.0210526	0.0618323	0.733496
			Weighted mode	1.03901	0.88-1.22	0.0382722	0.0827003	0.655849
Female infertility	Holdemania	14	MR Egger	0.832415	0.57-1.21	-0.183424	0.191702	0.357539	15.0321	0.239687	0.00598319	0.0184979	0.75192	0.543
			IVW	0.882426	0.78-1.00	-0.12508	0.0626299	0.0458111	15.1631	0.29728
			Weighted median	0.937558	0.80-1.10	-0.0644761	0.0814622	0.428661
			Weighted mode	0.948812	0.80-1.10	-0.0525442	0.116286	0.658821
Female infertility	Holdemanella	11	MR Egger	0.949722	0.70-1.29	-0.0515857	0.155545	0.74775	4.21989	0.896353	0.00296421	0.0169304	0.864891	0.913
			IVW	0.974278	0.88-1.08	-0.0260583	0.0541833	0.630568	4.25054	0.935338
			Weighted median	0.940463	0.82-1.08	-0.0613829	0.0727116	0.39856
			Weighted mode	0.892654	0.72-1.10	-0.113557	0.10639	0.310897
Female infertility	Haemophilus	9	MR Egger	1.09997	0.84-1.45	0.0952808	0.140402	0.519172	3.24776	0.861175	-0.0176961	0.0164682	0.318209	0.838
			IVW	0.961176	0.85-1.09	-0.0395982	0.062909	0.529053	4.40245	0.819112
			Weighted median	1.00702	0.86-1.18	0.00699961	0.0824289	0.932327
			Weighted mode	1.02482	0.84-1.25	0.0245188	0.102111	0.816276
Female infertility	Gordonibacter	10	MR Egger	0.965978	0.6-1.37	-0.0346144	0.17906	0.851533	3.36895	0.909119	0.00590949	0.0266694	0.83019	0.847
			IVW	1.00382	0.92-1.10	0.00381562	0.0445336	0.931721	3.41805	0.945396
			Weighted median	1.00749	0.91-1.12	0.00746638	0.0539603	0.88995
			Weighted mode	0.998427	0.83-1.20	-0.00157435	0.0946653	0.987094
Female infertility	Fusicatenibacter	18	MR Egger	1.58403	0.93-2.69	0.459973	0.270902	0.108881	16.4592	0.4214	-0.0373875	0.0182564	0.0573487	0.28
			IVW	0.928156	0.79-1.08	-0.0745554	0.0790555	0.345642	20.7735	0.236587
			Weighted median	0.925565	0.76-1.13	-0.0773513	0.103784	0.456083
			Weighted mode	0.795591	0.53-1.20	-0.22867	0.209247	0.289717
Female infertility	Flavonifractor	5	MR Egger	0.779616	0.35-1.74	-0.248954	0.411069	0.587511	1.24982	0.741081	0.0198905	0.0337315	0.596876	0.927
			IVW	0.985786	0.81-1.21	-0.014316	0.103164	0.889633	1.59754	0.809235
			Weighted median	0.932857	0.73-1.20	-0.0695038	0.128008	0.587155
			Weighted mode	0.910478	0.64-1.29	-0.0937853	0.17716	0.624558
Female infertility	FamilyXIIIUCG001	8	MR Egger	1.11537	0.62-2.00	0.10919	0.29921	0.727683	7.16076	0.306236	-0.0123969	0.025033	0.638054	0.623
			IVW	0.969367	0.81-1.16	-0.0311125	0.0908982	0.732142	7.45345	0.38324
			Weighted median	0.939301	0.74-1.20	-0.0626194	0.12459	0.615242
			Weighted mode	0.936026	0.67-1.30	-0.0661124	0.169071	0.707402
Female infertility	FamilyXIIIAD3011group	13	MR Egger	0.542207	0.27-1.10	-0.612107	0.359359	0.116557	10.0951	0.521852	0.0340836	0.0289451	0.263835	0.514
			IVW	0.820066	0.71-0.95	-0.19837	0.0753917	0.00850857	11.4817	0.48815
			Weighted median	0.859622	0.70-1.05	-0.151262	0.104091	0.146177
			Weighted mode	0.890063	0.65-1.21	-0.116463	0.156801	0.471926
Female infertility	Escherichia.Shigella	10	MR Egger	0.698391	0.41-1.18	-0.358977	0.266707	0.220274	6.46883	0.486192	0.0296307	0.0205913	0.193326	0.379
			IVW	1.00318	0.84-1.20	0.00317046	0.0912263	0.972276	8.53953	0.382615
			Weighted median	0.881114	0.70-1.11	-0.126568	0.119283	0.288655
			Weighted mode	0.83537	0.58-1.20	-0.179881	0.184057	0.35704
Female infertility	ErysipelotrichaceaeUCG003	16	MR Egger	0.912163	0.6-1.30	-0.0919366	0.18116	0.619712	14.4702	0.415302	-0.0022699	0.015823	0.887975	0.536
			IVW	0.890365	0.78-1.01	-0.116124	0.0651823	0.0748268	14.4915	0.48863
			Weighted median	0.919679	0.77-1.10	-0.0837302	0.0922445	0.364038
			Weighted mode	1.0251	0.74-1.42	0.0247879	0.166272	0.883476
Female infertility	Erysipelatoclostridium	15	MR Egger	0.87413	0.56-1.36	-0.134526	0.224126	0.558676	5.49216	0.962703	0.0170001	0.0179873	0.361836	0.965
			IVW	1.07281	0.96-1.20	0.0702811	0.0572153	0.219311	6.38541	0.955823
			Weighted median	1.04934	0.91-1.21	0.0481577	0.0739682	0.515008
			Weighted mode	1.03032	0.80-1.32	0.0298708	0.126322	0.816495
Female infertility	Enterorhabdus	6	MR Egger	0.640567	0.42-0.98	-0.445402	0.216409	0.108681	1.8745	0.758828	0.0680391	0.0280956	0.0726298	0.104
			IVW	1.04039	0.85-1.27	0.0395989	0.102014	0.697889	7.73911	0.171212
			Weighted median	1.08645	0.87-1.36	0.0829183	0.116147	0.475284
			Weighted mode	0.849443	0.58-1.25	-0.163174	0.198997	0.449534
Female infertility	Eisenbergiella	11	MR Egger	0.815248	0.36-1.83	-0.204263	0.412502	0.632336	10.464	0.314244	0.0221011	0.0430843	0.620323	0.411
			IVW	1.00541	0.91-1.12	0.00540033	0.0536204	0.919777	10.7699	0.375721
			Weighted median	1.01556	0.89-1.16	0.0154443	0.0689493	0.822761
			Weighted mode	1.02924	0.83-1.28	0.0288245	0.112597	0.803142
Female infertility	Eggerthella	10	MR Egger	1.17804	0.68-2.03	0.163856	0.278609	0.572676	10.0675	0.260318	-0.0269482	0.0305723	0.403775	0.308
			IVW	0.926874	0.83-1.04	-0.0759371	0.0593878	0.201015	11.0453	0.272616
			Weighted median	1.0024	0.86-1.17	0.00239215	0.079103	0.975875
			Weighted mode	1.02816	0.81-1.31	0.0277741	0.122668	0.825935
Female infertility	Dorea	10	MR Egger	1.52412	0.69-3.38	0.421418	0.406393	0.330074	17.8813	0.0221342	-0.0193867	0.0266978	0.488442	0.027
			IVW	1.15699	0.88-1.53	0.145826	0.141453	0.302581	19.0599	0.0246883
			Weighted median	1.10509	0.84-1.45	0.0999247	0.138377	0.47022
			Weighted mode	1.08586	0.75-1.56	0.0823684	0.186089	0.66848
Female infertility	Dialister	11	MR Egger	0.789238	0.42-1.49	-0.236688	0.322656	0.481888	9.73885	0.372038	0.020087	0.023714	0.418919	0.458
			IVW	1.02879	0.88-1.20	0.0283794	0.0775141	0.714276	10.5152	0.396508
			Weighted median	0.947769	0.77-1.17	-0.0536446	0.106937	0.615914
			Weighted mode	0.891266	0.61-1.31	-0.115112	0.197598	0.573093
Female infertility	DefluviitaleaceaeUCG011	9	MR Egger	1.42385	0.86-2.37	0.353367	0.260082	0.216404	4.43239	0.728843	-0.0453261	0.0260207	0.125057	0.604
			IVW	0.921315	0.80-1.06	-0.0819533	0.0720334	0.255241	7.4667	0.487215
			Weighted median	0.938262	0.78-1.13	-0.0637259	0.096675	0.509782
			Weighted mode	1.05316	0.78-1.42	0.0517948	0.151248	0.740836
Female infertility	Coprococcus3	9	MR Egger	1.18482	0.40-3.54	0.169588	0.558009	0.770026	6.90821	0.438499	-0.017243	0.0330112	0.617552	0.52
			IVW	0.889428	0.73-1.08	-0.117177	0.0998535	0.240599	7.18105	0.517231
			Weighted median	0.994806	0.77-1.29	-0.00520751	0.132499	0.968649
			Weighted mode	1.00145	0.67-1.49	0.00144775	0.204095	0.994514
Female infertility	Coprococcus1	11	MR Egger	1.41514	0.96-2.09	0.347228	0.19912	0.11516	5.44906	0.793539	-0.0229906	0.0144503	0.14607	0.578
			IVW	1.05941	0.90-1.24	0.0577143	0.08085	0.475324	7.98039	0.630753
			Weighted median	1.15212	0.93-1.43	0.141601	0.111586	0.204446
			Weighted mode	1.13322	0.83-1.55	0.125067	0.160142	0.45291
Female infertility	Coprobacter	10	MR Egger	0.752089	0.43-1.31	-0.284901	0.284059	0.345247	13.247	0.103627	0.0349379	0.0299792	0.277424	0.069
			IVW	1.03466	0.89-1.20	0.0340755	0.0774953	0.660147	15.496	0.0781816
			Weighted median	1.00152	0.85-1.18	0.00151997	0.0840563	0.985573
			Weighted mode	0.943605	0.71-1.26	-0.0580477	0.146003	0.700207
Female infertility	Collinsella	9	MR Egger	0.45582	0.22-0.94	-0.785657	0.368011	0.0701632	7.05738	0.42293	0.0584295	0.0257946	0.0578876	0.106
			IVW	1.01775	0.80-1.29	0.0175927	0.121188	0.884577	12.2305	0.141213
			Weighted median	1.04769	0.80-1.38	0.0465903	0.140336	0.739896
			Weighted mode	1.05262	0.69-1.61	0.0512807	0.217066	0.819179
Female infertility	Clostridiumsensustricto1	7	MR Egger	1.4788	0.92-2.36	0.391228	0.239547	0.163356	5.77574	0.328656	-0.0357467	0.0238403	0.194047	0.285
			IVW	1.06213	0.87-1.30	0.0602799	0.102324	0.555788	8.37283	0.212041
			Weighted median	1.12335	0.88-1.44	0.116318	0.127381	0.361164
			Weighted mode	1.23368	0.81-1.89	0.210004	0.216295	0.369087
Female infertility	ChristensenellaceaeR	8	MR Egger	0.941661	0.36-2.47	-0.0601099	0.491448	0.906646	9.95561	0.126534	0.0124179	0.0365327	0.745506	0.266
			IVW	1.10519	0.86-1.43	0.100021	0.130829	0.444562	10.1473	0.180377
			Weighted median	0.972031	0.72-1.32	-0.0283677	0.156536	0.856193
			Weighted mode	0.861372	0.48-1.55	-0.149229	0.299401	0.633461
Female infertility	Catenibacterium	4	MR Egger	0.82709	0.16-4.27	-0.189842	0.837453	0.841727	0.722766	0.696712	0.0164798	0.107591	0.892322	0.886
			IVW	0.939903	0.82-1.07	-0.0619784	0.0668674	0.353986	0.746227	0.862281
			Weighted median	0.94758	0.82-1.10	-0.053844	0.0746582	0.470782
			Weighted mode	0.966362	0.79-1.19	-0.0342165	0.104192	0.764198
Female infertility	Butyrivibrio	15	MR Egger	1.1352	0.85-1.52	0.126812	0.147744	0.406263	13.3281	0.422801	-0.0151432	0.0211193	0.486037	0.504
			IVW	1.02405	0.96-1.09	0.0237675	0.0338679	0.482821	13.8552	0.460554
			Weighted median	1.03495	0.94-1.13	0.0343558	0.0464385	0.459414
			Weighted mode	1.03339	0.90-1.19	0.0328444	0.0724338	0.657181
Female infertility	Butyricimonas	13	MR Egger	1.01638	0.60-1.73	0.0162462	0.27191	0.953428	13.4037	0.267762	-0.00970512	0.0232992	0.685025	0.169
			IVW	0.911734	0.79-1.05	-0.0924071	0.0740861	0.21229	13.6151	0.32596
			Weighted median	0.98452	0.81-1.19	-0.0156015	0.0968889	0.872074
			Weighted mode	1.02776	0.77-1.36	0.0273828	0.144613	0.852982
Female infertility	Butyricicoccus	8	MR Egger	1.01335	0.71-1.44	0.0132631	0.180495	0.943811	4.35009	0.629413	-0.0011018	0.0154785	0.945566	0.861
			IVW	1.00222	0.84-1.20	0.00221327	0.0920945	0.980827	4.35515	0.738082
			Weighted median	1.06224	0.84-1.34	0.0603756	0.118554	0.610566
			Weighted mode	1.07522	0.80-1.44	0.0725292	0.150636	0.644858
Female infertility	Blautia	12	MR Egger	1.0447	0.60-1.82	0.0437309	0.283147	0.880331	15.3811	0.118773	-0.00520165	0.0197892	0.798	0.198
			IVW	0.975441	0.79-1.20	-0.0248655	0.105101	0.812977	15.4874	0.161253
			Weighted median	1.03506	0.80-1.33	0.0344609	0.129403	0.790003
			Weighted mode	1.16311	0.73-1.84	0.151096	0.234919	0.533285
Female infertility	Bilophila	13	MR Egger	0.339136	0.16-0.70	-1.08135	0.37177	0.0142231	10.0439	0.526442	0.0748332	0.0269077	0.0178683	0.258
			IVW	0.933468	0.78-1.12	-0.0688491	0.0916543	0.452543	17.7785	0.122584
			Weighted median	0.957006	0.77-1.20	-0.0439453	0.114213	0.70041
			Weighted mode	1.05581	0.75-1.49	0.0543073	0.177133	0.76441
Female infertility	Bifidobacterium	12	MR Egger	0.841026	0.57-1.24	-0.173133	0.198263	0.405224	9.29589	0.410422	0.016913	0.0147727	0.281789	0.356
			IVW	1.03544	0.88-1.21	0.0348268	0.0806871	0.666012	10.6497	0.385449
			Weighted median	1.09119	0.88-1.36	0.0872715	0.112546	0.438085
			Weighted mode	0.839958	0.60-1.18	-0.174403	0.174395	0.340873
Female infertility	Barnesiella	12	MR Egger	0.956437	0.44-2.09	-0.0445405	0.399251	0.91338	15.322	0.120757	0.001812	0.029627	0.952437	0.091
			IVW	0.979355	0.82-1.18	-0.0208614	0.092978	0.82247	15.3277	0.167981
			Weighted median	0.972997	0.77-1.22	-0.0273743	0.116624	0.814425
			Weighted mode	0.964408	0.63-1.47	-0.0362412	0.215797	0.869677
Female infertility	Bacteroides	7	MR Egger	0.820216	0.27-2.50	-0.198187	0.568861	0.741734	5.53979	0.353603	0.0162038	0.0364501	0.675229	0.694
			IVW	1.05076	0.85-1.30	0.049518	0.10883	0.649107	5.75875	0.450751
			Weighted median	1.0494	0.79-1.40	0.0482183	0.148038	0.744639
			Weighted mode	1.31509	0.81-2.15	0.273907	0.250417	0.315999
Female infertility	Anaerotruncus	13	MR Egger	1.24594	0.78-2.00	0.219891	0.240394	0.379958	11.4309	0.407902	-0.0105971	0.0163062	0.529107	0.562
			IVW	1.07588	0.92-1.26	0.073135	0.0808619	0.365761	11.8698	0.456194
			Weighted median	1.18136	0.95-1.48	0.166666	0.113546	0.142151
			Weighted mode	1.25449	0.88-1.78	0.226732	0.179738	0.231114
Female infertility	Anaerostipes	13	MR Egger	0.875282	0.48-1.59	-0.133209	0.305605	0.67135	4.80495	0.940243	0.00299163	0.0194236	0.880383	0.963
			IVW	0.915792	0.78-1.08	-0.0879659	0.0843033	0.296742	4.82867	0.963458
			Weighted median	0.938273	0.76-1.16	-0.0637143	0.108878	0.558421
			Weighted mode	0.934876	0.65-1.34	-0.0673412	0.182232	0.718167
Female infertility	Anaerofilum	11	MR Egger	0.910015	0.48-1.73	-0.0942941	0.328406	0.780516	13.058	0.159999	0.0166205	0.0363385	0.658238	0.26
			IVW	1.0548	0.94-1.18	0.0533547	0.0579115	0.356886	13.3615	0.204155
			Weighted median	1.02374	0.89-1.18	0.023461	0.0718551	0.744043
			Weighted mode	0.991915	0.80-1.23	-0.00811819	0.109245	0.942228
Female infertility	Alloprevotella	5	MR Egger	0.792974	0.30-2.07	-0.231965	0.489223	0.667768	1.84648	0.604873	0.0363537	0.0676332	0.628226	0.488
			IVW	1.02968	0.92-1.15	0.0292444	0.0564245	0.604254	2.1354	0.710871
			Weighted median	1.0242	0.89-1.18	0.0239091	0.0735371	0.745083
			Weighted mode	1.00203	0.83-1.21	0.00202522	0.094692	0.983961
Female infertility	Allisonella	8	MR Egger	0.709324	0.35-1.44	-0.343443	0.361951	0.379324	8.68811	0.191893	0.0475725	0.0514061	0.390448	0.14
			IVW	0.987904	0.89-1.10	-0.0121695	0.0529896	0.818357	9.92821	0.192679
			Weighted median	1.05277	0.94-1.18	0.0514252	0.0576846	0.372667
			Weighted mode	1.08017	0.93-1.26	0.077115	0.077494	0.35283
Female infertility	Alistipes	11	MR Egger	0.767677	0.28-2.11	-0.264386	0.516628	0.621143	11.4372	0.246925	0.00761683	0.0314301	0.813947	0.314
			IVW	0.867501	0.70-1.07	-0.142138	0.106164	0.180619	11.5119	0.319053
			Weighted median	0.863873	0.65-1.14	-0.14633	0.141876	0.302357
			Weighted mode	0.855176	0.54-1.36	-0.156448	0.235154	0.520908
Female infertility	Akkermansia	11	MR Egger	0.602186	0.37-0.97	-0.507188	0.245635	0.0689413	8.55006	0.479799	0.0417472	0.0192673	0.0584232	0.14
			IVW	1.00132	0.85-1.18	0.00131526	0.0834563	0.987426	13.2448	0.210305
			Weighted median	1.13622	0.92-1.40	0.127706	0.108008	0.237057
			Weighted mode	1.15335	0.76-1.74	0.142675	0.210588	0.513453
Female infertility	Adlercreutzia	8	MR Egger	0.730469	0.38-1.41	-0.314069	0.336514	0.386683	3.45776	0.749581	0.0258428	0.0297161	0.417915	0.133
			IVW	0.971596	0.84-1.13	-0.0288153	0.0751901	0.701547	4.21406	0.754818
			Weighted median	1.01799	0.84-1.23	0.0178317	0.0957261	0.852227
			Weighted mode	1.04136	0.78-1.39	0.0405236	0.14679	0.790471
Female infertility	Actinomyces	7	MR Egger	0.774662	0.55-1.09	-0.255329	0.17198	0.197766	1.89623	0.86331	0.0220862	0.0193846	0.306174	0.882
			IVW	0.926347	0.81-1.06	-0.0765064	0.0703164	0.276582	3.19439	0.784084
			Weighted median	0.907753	0.76-1.08	-0.096783	0.0895207	0.279642
			Weighted mode	0.867824	0.69-1.09	-0.141767	0.117202	0.271927
Female infertility	Ruminococcusgnavusgroup	11	MR Egger	1.11333	0.58-2.13	0.107358	0.331671	0.75357	14.6118	0.102166	-0.0117909	0.0363993	0.753391	0.138
			IVW	1.00229	0.88-1.14	0.00228438	0.0660414	0.972407	14.7822	0.140208
			Weighted median	0.967947	0.84-1.12	-0.0325777	0.0742667	0.660909
			Weighted mode	0.931147	0.73-1.19	-0.0713377	0.125824	0.583241
Female infertility	Ruminococcusgauvreauiigroup	11	MR Egger	1.90952	0.87-4.20	0.64685	0.40196	0.142025	14.4157	0.108288	-0.0440302	0.0292825	0.166928	0.098
			IVW	1.06244	0.87-1.30	0.0605656	0.10366	0.559036	18.0371	0.0543408
			Weighted median	1.18088	0.94-1.48	0.166258	0.114976	0.148169
			Weighted mode	1.31016	0.92-1.87	0.270149	0.18203	0.168608
Female infertility	Eubacteriumxylanophilumgroup	9	MR Egger	0.868705	0.54-1.39	-0.140752	0.238376	0.573442	4.65591	0.70187	0.0115307	0.0195071	0.573035	0.626
			IVW	0.992095	0.85-1.16	-0.00793656	0.079607	0.920585	5.00532	0.757008
			Weighted median	0.971805	0.79-1.19	-0.0286003	0.101922	0.779009
			Weighted mode	0.868037	0.63-1.21	-0.141521	0.168546	0.425479
Female infertility	Eubacteriumventriosumgroup	15	MR Egger	0.827838	0.44-1.55	-0.188938	0.321154	0.566406	10.2484	0.673507	0.00725869	0.0240279	0.767359	0.816
			IVW	0.909923	0.79-1.05	-0.0943948	0.0720856	0.190371	10.3397	0.736953
			Weighted median	0.917495	0.76-1.11	-0.0861084	0.0966882	0.373156
			Weighted mode	0.930163	0.69-1.25	-0.0723955	0.1563	0.650352
Female infertility	Eubacteriumruminantiumgroup	17	MR Egger	0.957477	0.70-1.31	-0.0434541	0.160153	0.789837	15.4173	0.421795	0.00668366	0.0150993	0.664339	0.497
			IVW	1.02458	0.94-1.12	0.0242819	0.0466039	0.602347	15.6187	0.479874
			Weighted median	1.05573	0.93-1.20	0.0542356	0.06659	0.415375
			Weighted mode	1.0463	0.87-1.26	0.0452617	0.0931147	0.633497
Female infertility	Eubacteriumrectalegroup	8	MR Egger	0.462828	0.20-1.06	-0.770399	0.421127	0.117089	7.7269	0.258802	0.0478011	0.0267614	0.124306	0.223
			IVW	0.953628	0.73-1.24	-0.047482	0.133359	0.721806	11.8357	0.106094
			Weighted median	0.94829	0.73-1.24	-0.0530954	0.135823	0.69586
			Weighted mode	0.935079	0.61-1.43	-0.0671242	0.218049	0.767162
Female infertility	Eubacteriumoxidoreducensgroup	5	MR Egger	0.700211	0.41-1.21	-0.356374	0.27744	0.289167	1.64325	0.649624	0.0321253	0.0298233	0.360302	0.081
			IVW	0.933798	0.81-1.08	-0.0684948	0.0744958	0.357863	2.80357	0.591216
			Weighted median	0.9877	0.82-1.18	-0.0123766	0.0927876	0.893888
			Weighted mode	1.01433	0.80-1.29	0.0142272	0.12377	0.914025
Female infertility	Eubacteriumnodatumgroup	11	MR Egger	1.22675	0.81-1.85	0.204367	0.209275	0.35431	11.9781	0.214544	-0.0219702	0.0303619	0.487685	0.266
			IVW	1.05844	0.97-1.16	0.0567944	0.045824	0.215196	12.675	0.242413
			Weighted median	1.05956	0.95-1.18	0.057851	0.0566885	0.307488
			Weighted mode	1.06023	0.90-1.26	0.0584841	0.0861672	0.512711
Female infertility	Eubacteriumhalliigroup	15	MR Egger	1.24427	0.94-1.64	0.218551	0.141235	0.145753	11.2808	0.587303	-0.0278885	0.0110614	0.0255438	0.261
			IVW	0.909847	0.78-1.06	-0.0944788	0.0755658	0.211195	17.6375	0.223792
			Weighted median	1.02288	0.85-1.23	0.022622	0.0960218	0.813749
			Weighted mode	1.04408	0.83-1.32	0.0431328	0.119493	0.723515
Female infertility	Eubacteriumfissicatenagroup	9	MR Egger	1.22368	0.74-2.03	0.201864	0.257995	0.459605	3.2345	0.862495	-0.0181289	0.0333002	0.603062	0.887
			IVW	1.06615	0.97-1.18	0.0640506	0.0498006	0.198393	3.53089	0.896779
			Weighted median	1.08466	0.95-1.23	0.0812681	0.0656785	0.215953
			Weighted mode	1.14861	0.95-1.39	0.138552	0.0986299	0.197707
Female infertility	Eubacteriumeligensgroup	6	MR Egger	1.24005	0.50-3.07	0.215151	0.463068	0.666367	4.97518	0.289854	-0.0106442	0.0364761	0.784937	0.616
			IVW	1.08865	0.87-1.36	0.0849413	0.111918	0.447876	5.08109	0.406064
			Weighted median	1.15973	0.88-1.53	0.148191	0.142871	0.299624
			Weighted mode	1.31095	0.84-2.05	0.270748	0.227423	0.287283
Female infertility	Eubacteriumcoprostanoligenesgroup	13	MR Egger	0.829734	0.43-1.61	-0.18665	0.337682	0.591497	8.92303	0.628997	0.015717	0.0208022	0.465793	0.679
			IVW	1.06187	0.90-1.26	0.0600346	0.0861827	0.486055	9.49388	0.660268
			Weighted median	1.09193	0.86-1.38	0.0879485	0.119356	0.46121
			Weighted mode	1.10622	0.72-1.70	0.100951	0.218162	0.651835
Female infertility	Eubacteriumbrachygroup	10	MR Egger	1.39724	0.83-2.34	0.334497	0.263979	0.240748	15.8167	0.0450804	-0.0483921	0.0331118	0.182022	0.021
			IVW	0.961566	0.84-1.10	-0.0391925	0.0696363	0.573559	20.0395	0.0176699
			Weighted median	0.973783	0.85-1.12	-0.0265667	0.0702036	0.705116
			Weighted mode	0.818807	0.61-1.10	-0.199907	0.152712	0.222953
Female infertility	Clostridiuminnocuumgroup	7	MR Egger	1.5688	0.94-2.61	0.450309	0.260282	0.144176	4.51288	0.478162	-0.049161	0.0359927	0.230213	0.501
			IVW	1.10761	1.00-1.23	0.102203	0.0544795	0.0606568	6.37845	0.382157
			Weighted median	1.09629	0.95-1.27	0.0919345	0.074158	0.215082
			Weighted mode	1.00009	0.79-1.27	8.78106e-05	0.123407	0.999455
Female infertility	Faecalibacterium	10	MR Egger	1.52364	1.12-2.07	0.4211	0.157215	0.0279911	9.74569	0.28333	-0.02559	0.0164005	0.157305	0.135
			IVW	1.23447	1.04-1.46	0.210646	0.0869726	0.0154362	12.7116	0.176098
			Weighted median	1.41737	1.15-1.74	0.348805	0.104535	0.00084765
			Weighted mode	1.41847	1.12-1.80	0.34958	0.120123	0.0173062
Female infertility	Desulfovibrio	10	MR Egger	0.755921	0.50-1.14	-0.279819	0.208656	0.21673	6.88831	0.54873	0.0123423	0.0204825	0.563478	0.665
			IVW	0.850879	0.74-0.98	-0.161486	0.0705156	0.0220173	7.25141	0.610962
			Weighted median	0.873832	0.72-1.06	-0.134867	0.09759	0.16698
			Weighted mode	0.828004	0.64-1.08	-0.188737	0.134885	0.195247
Female infertility	CandidatusSoleaferrea	9	MR Egger	0.855433	0.26-2.79	-0.156148	0.604034	0.803451	5.69244	0.576085	0.0225959	0.0563644	0.700456	0.766
			IVW	1.08854	0.97-1.22	0.0848366	0.0592175	0.151964	5.85315	0.663677
			Weighted median	1.13274	0.97-1.32	0.124638	0.0792007	0.115557
			Weighted mode	1.13827	0.88-1.47	0.129513	0.131778	0.354483
Notes:IVW:inverse-variance weighted;Beta: estimate coefficient; P-value: P-value from GWAS ; SE: standard error of coefficient estimate.

## Sheet: Supplementary Table 1C
Supplementary Table 1C. Main information of instrumental variables for endometriosis used in MR analyses(P<1e-5)
Trait(outcome)	Bacterial genera（exposure）	SNP	Effect allele	Other allele	Exposure			Outcome			R2	F-statistics
					Beta	SE	P-value	Beta	SE	P-value
Endometriosis	Olsenella	rs62112538	C	T	-0.19943	0.0407033	1.19e-06	-0.0543	0.0282	0.0544001	0.00656984	23.993
Endometriosis	Olsenella	rs17148768	G	A	0.140434	0.0295602	2.2e-06	0.0011	0.0236	0.9636	0.00614891	22.5576
Endometriosis	Olsenella	rs72691585	C	A	-0.249079	0.0520814	2.95e-06	0.0022	0.0257	0.9318	0.00737606	22.8573
Endometriosis	Olsenella	rs2759329	G	A	-0.111131	0.0237218	3.43e-06	0.0108	0.0182	0.5531	0.00583552	21.9353
Endometriosis	Olsenella	rs35225860	A	G	-0.223604	0.0482391	3.87e-06	-0.035	0.045	0.4366	0.00588422	21.4743
Endometriosis	Olsenella	rs1035588	A	G	0.122938	0.0269928	4.48e-06	-0.0416	0.0182	0.0221401	0.00556758	20.7322
Endometriosis	Olsenella	rs7540303	C	T	-0.108148	0.0236848	4.86e-06	0.0112	0.0182	0.5389	0.00554536	20.8386
Endometriosis	Olsenella	rs61090148	A	G	0.108044	0.023638	5.32e-06	-0.0155	0.0178	0.3822	0.00555654	20.8808
Endometriosis	Olsenella	rs9460691	C	A	0.119966	0.0268645	7.28e-06	0.0117	0.0224	0.6017	0.00530508	19.9308
Endometriosis	Olsenella	rs8066522	G	A	-0.106529	0.0240379	9.7e-06	-0.0128	0.0188	0.495801	0.00522529	19.6295
Endometriosis	Anaerotruncus	rs6563550	T	C	0.0877135	0.0176745	2.35e-07	0.0034	0.0327	0.9184	0.00148449	24.6256
Endometriosis	Anaerotruncus	rs8005030	C	T	0.0554447	0.0117854	2.28e-06	0.0185	0.0186	0.3203	0.00133568	22.1297
Endometriosis	Anaerotruncus	rs4669806	G	T	0.0576389	0.0122994	2.42e-06	0.0157	0.0213	0.4622	0.00132395	21.9589
Endometriosis	Anaerotruncus	rs9347879	T	C	0.050618	0.011049	4.22e-06	0.0303	0.0176	0.0839499	0.00126531	20.9851
Endometriosis	Anaerotruncus	rs1272208	G	T	-0.0611743	0.0129831	4.28e-06	-0.006	0.0207	0.773101	0.00137563	22.1988
Endometriosis	Anaerotruncus	rs11018566	A	G	-0.156465	0.0366032	6.14e-06	-0.0361	0.0392	0.3563	0.00290211	18.2666
Endometriosis	Anaerotruncus	rs6494922	A	G	0.0903106	0.0202257	6.62e-06	-0.0772	0.0394	0.0499195	0.00123937	19.9351
Endometriosis	Anaerotruncus	rs10150232	A	G	0.0567088	0.0124877	6.68e-06	0.0096	0.022	0.6633	0.0012779	20.6197
Endometriosis	Anaerotruncus	rs115414803	A	C	-0.144356	0.0317524	6.83e-06	-0.0167	0.0367	0.6489	0.00222397	20.6644
Endometriosis	Anaerotruncus	rs1431492	C	T	-0.0654996	0.0146188	7.36e-06	-0.0035	0.0239	0.8845	0.00121079	20.0725
Endometriosis	Anaerotruncus	rs17734739	T	C	0.0660052	0.014908	7.43e-06	0.0144	0.0251	0.5672	0.00122927	19.6002
Endometriosis	Anaerotruncus	rs7155595	C	A	0.0539336	0.0118903	7.55e-06	0.0572	0.0192	0.002852	0.00124142	20.5722
Endometriosis	Anaerotruncus	rs34449434	A	C	-0.0497004	0.0113402	9.85e-06	-0.0142	0.0185	0.4427	0.00119035	19.2054
Endometriosis	RuminococcaceaeUCG002	rs77564310	A	C	-0.0713093	0.0140855	3.29e-07	-0.0018	0.0217	0.9356	0.00150537	25.6268
Endometriosis	RuminococcaceaeUCG002	rs55793120	T	C	0.137396	0.027414	4.81e-07	0.0667	0.0368	0.0698393	0.00214802	25.1148
Endometriosis	RuminococcaceaeUCG002	rs10927423	C	A	-0.0713617	0.0147712	8.5e-07	-0.0461	0.0229	0.0443803	0.00136336	23.3371
Endometriosis	RuminococcaceaeUCG002	rs7155595	C	A	0.0569929	0.0116986	1.15e-06	0.0572	0.0192	0.002852	0.00138733	23.7312
Endometriosis	RuminococcaceaeUCG002	rs11750293	G	T	-0.0578304	0.0120512	1.76e-06	-0.0109	0.0183	0.5514	0.00134531	23.0249
Endometriosis	RuminococcaceaeUCG002	rs7120052	A	C	0.0624796	0.0135523	1.97e-06	0.0349	0.0224	0.119	0.00124162	21.252
Endometriosis	RuminococcaceaeUCG002	rs116974815	C	A	-0.189731	0.0396566	2.03e-06	-0.0685	0.0351	0.0511906	0.00391823	22.882
Endometriosis	RuminococcaceaeUCG002	rs10916131	C	T	-0.069333	0.0146753	2.87e-06	-0.001	0.024	0.9666	0.00130382	22.3179
Endometriosis	RuminococcaceaeUCG002	rs12463378	A	G	-0.0522061	0.0112086	2.96e-06	0.0076	0.0191	0.6911	0.00127493	21.6912
Endometriosis	RuminococcaceaeUCG002	rs76847269	A	G	0.163508	0.0356151	5.17e-06	0.0062	0.0558	0.9121	0.00274617	21.0716
Endometriosis	RuminococcaceaeUCG002	rs882348	A	G	-0.0799946	0.0178618	5.45e-06	0.0057	0.0272	0.8327	0.00117177	20.0549
Endometriosis	RuminococcaceaeUCG002	rs11607472	A	G	-0.0780229	0.0176325	7.19e-06	0.0285	0.0348	0.4122	0.00120112	19.5778
Endometriosis	RuminococcaceaeUCG002	rs57079348	T	G	-0.076573	0.017282	7.22e-06	-0.0183	0.0379	0.6285	0.00119769	19.6296
Endometriosis	RuminococcaceaeUCG002	rs10964441	G	A	-0.14906	0.034486	7.45e-06	-0.0338	0.0289	0.2416	0.00348252	18.6756
Endometriosis	RuminococcaceaeUCG002	rs113147300	A	G	-0.075842	0.0164562	7.69e-06	0.0268	0.0255	0.2926	0.00129583	21.2377
Endometriosis	RuminococcaceaeUCG002	rs6542556	A	G	0.050974	0.011406	7.86e-06	-0.0457	0.0181	0.0113201	0.00116702	19.97
Endometriosis	RuminococcaceaeUCG002	rs7249614	A	G	-0.0492778	0.0110807	9.07e-06	-0.0056	0.0181	0.7576	0.00118635	19.7751
Endometriosis	RuminococcaceaeUCG002	rs15256	C	T	0.0732376	0.016834	9.46e-06	0.031	0.0272	0.2542	0.00110597	18.9253
Endometriosis	RuminococcaceaeUCG002	rs6793778	C	T	-0.0558706	0.0125258	9.81e-06	-0.0001	0.02	0.9953	0.00116254	19.8932
Endometriosis	Oscillospira	rs12206468	G	A	-0.133016	0.0269733	1.04e-06	-0.0038	0.0329	0.9086	0.00253891	24.3134
Endometriosis	Oscillospira	rs1954532	T	C	-0.0826246	0.0175252	2.27e-06	-0.0123	0.0221	0.579399	0.00225359	22.2232
Endometriosis	Oscillospira	rs28889936	A	C	0.114051	0.0252838	3.37e-06	0.0142	0.0297	0.632	0.00208087	20.3433
Endometriosis	Oscillospira	rs8076323	A	G	0.0715392	0.0156539	5.61e-06	0.013	0.0187	0.4869	0.00204481	20.8814
Endometriosis	Oscillospira	rs72866977	A	C	-0.130569	0.0281674	5.63e-06	0.0061	0.0327	0.8522	0.00235622	21.4828
Endometriosis	Oscillospira	rs62422654	C	T	0.0898456	0.0198088	6.47e-06	0.0388	0.0216	0.0717695	0.00210142	20.5678
Endometriosis	Oscillospira	rs751183	T	C	-0.0774322	0.0172216	6.85e-06	-0.0253	0.0228	0.2678	0.00205007	20.2121
Endometriosis	Oscillospira	rs12925026	T	C	0.13559	0.030678	9.31e-06	0.056	0.0379	0.1399	0.0023766	19.5297
Endometriosis	Holdemanella	rs607782	T	C	-0.0854214	0.0172515	7.19e-07	-0.016	0.0183	0.3803	0.00327754	24.5111
Endometriosis	Holdemanella	rs73011279	T	C	-0.0961669	0.0199336	1.36e-06	-0.0183	0.0209	0.3822	0.00311185	23.2681
Endometriosis	Holdemanella	rs75764681	T	C	-0.283103	0.0598999	1.94e-06	-0.0539	0.0428	0.2078	0.0073835	22.3227
Endometriosis	Holdemanella	rs4541991	T	C	-0.0927334	0.0194435	2.1e-06	0.03	0.0187	0.1088	0.00296195	22.7411
Endometriosis	Holdemanella	rs8113760	G	A	0.078999	0.01734	4.62e-06	-0.0204	0.0191	0.2841	0.00277606	20.7504
Endometriosis	Holdemanella	rs12513188	G	A	0.0903906	0.0195276	4.65e-06	0.0379	0.0198	0.05626	0.00277492	21.4208
Endometriosis	Holdemanella	rs34187114	C	A	-0.104505	0.022601	5.13e-06	0.0208	0.0278	0.4535	0.0027676	21.3752
Endometriosis	Holdemanella	rs62113381	T	C	-0.105447	0.0232029	5.54e-06	-0.0637	0.026	0.0142699	0.00281736	20.6474
Endometriosis	Holdemanella	rs35228298	G	A	0.0934832	0.0202886	7.3e-06	-0.0128	0.0242	0.597901	0.00283938	21.225
Endometriosis	Holdemanella	rs1926302	G	A	-0.107972	0.0231421	7.5e-06	-0.0235	0.0211	0.2659	0.0028183	21.7622
Endometriosis	Holdemanella	rs17586763	T	C	-0.227285	0.0510135	7.72e-06	0.0208	0.0397	0.6005	0.00517363	19.84
Endometriosis	Odoribacter	rs77779484	G	A	-0.133489	0.0268526	6.56e-07	0.0034	0.0367	0.926	0.00206633	24.7086
Endometriosis	Odoribacter	rs10093869	A	G	-0.0577795	0.0125389	3.67e-06	-0.0213	0.0179	0.2337	0.00149121	21.2308
Endometriosis	Odoribacter	rs28417404	A	G	-0.0726896	0.0161372	3.68e-06	-0.0527	0.0296	0.0747808	0.00137858	20.2876
Endometriosis	Odoribacter	rs4793970	A	G	-0.0576329	0.0129154	6.03e-06	0.0135	0.0184	0.4638	0.00135395	19.9098
Endometriosis	Odoribacter	rs6856150	G	A	0.0881922	0.0194146	6.06e-06	0.0185	0.0267	0.4897	0.00141164	20.6321
Endometriosis	Odoribacter	rs74553962	T	G	0.121449	0.0264106	9.49e-06	-0.0419	0.0336	0.2133	0.00178839	21.1426
Endometriosis	Methanobrevibacter	rs76029318	T	C	0.222849	0.0454319	1.08e-06	-0.0002	0.0366	0.9965	0.00705357	24.0459
Endometriosis	Methanobrevibacter	rs10202904	T	G	-0.112811	0.0239106	3.09e-06	-0.0045	0.0179	0.802	0.00617426	22.2474
Endometriosis	Methanobrevibacter	rs894996	C	A	0.214213	0.0456045	3.82e-06	0.0397	0.0345	0.2495	0.00630195	22.0509
Endometriosis	Methanobrevibacter	rs1334944	T	C	0.115197	0.0255492	7.61e-06	-0.0123	0.0195	0.5286	0.00563712	20.318
Endometriosis	Methanobrevibacter	rs6776814	T	C	-0.188956	0.0419905	8.05e-06	-0.0154	0.0618	0.8033	0.00613025	20.2374
Endometriosis	Methanobrevibacter	rs4802933	A	G	-0.135628	0.0308139	9.74e-06	-0.0133	0.0209	0.5244	0.00537352	19.3627
Endometriosis	Dorea	rs62503162	A	G	-0.0974091	0.0194379	7.47e-07	0.0109	0.0434	0.8018	0.00154684	25.11
Endometriosis	Dorea	rs13279148	G	A	0.0715309	0.0150878	2.25e-06	-0.0005	0.0281	0.9863	0.00127511	22.4744
Endometriosis	Dorea	rs4793307	C	T	0.0574165	0.0122472	4.01e-06	-0.0127	0.0207	0.5396	0.00124723	21.9762
Endometriosis	Dorea	rs1899291	C	T	0.0697217	0.0150285	4.57e-06	-0.0315	0.0242	0.1936	0.00122079	21.5208
Endometriosis	Dorea	rs11150408	T	G	0.0488254	0.0109063	7.06e-06	0.0012	0.0177	0.9453	0.00116284	20.0393
Endometriosis	Dorea	rs3752849	G	A	0.163846	0.036608	7.68e-06	0.0341	0.0403	0.3971	0.00374984	20.0242
Endometriosis	Dorea	rs345219	T	G	-0.0497368	0.0112621	8.8e-06	-0.0059	0.0178	0.738401	0.00113167	19.5015
Endometriosis	Dorea	rs12537781	T	C	-0.055544	0.0125223	9.15e-06	-0.0033	0.0205	0.872	0.00111612	19.6724
Endometriosis	Coprococcus3	rs8100692	T	C	0.0577411	0.0113476	4.16e-07	0.0185	0.0176	0.2927	0.00163305	25.8885
Endometriosis	Coprococcus3	rs178271	T	C	0.145257	0.0294239	7.81e-07	0.0073	0.0694	0.9162	0.00225275	24.3665
Endometriosis	Coprococcus3	rs13394391	C	T	-0.0709302	0.0150918	2.2e-06	-0.0482	0.0242	0.0468403	0.00139311	22.0864
Endometriosis	Coprococcus3	rs7521171	G	A	-0.0596434	0.0129279	4.32e-06	-0.0027	0.019	0.8875	0.00137382	21.2822
Endometriosis	Coprococcus3	rs11080344	C	T	0.0516921	0.0113054	4.79e-06	0.0226	0.0176	0.1997	0.00131851	20.9036
Endometriosis	Coprococcus3	rs4575475	G	A	0.0619514	0.0137787	7.04e-06	-0.044	0.0209	0.0350002	0.00133223	20.2128
Endometriosis	Coprococcus3	rs13247359	G	A	0.051211	0.0113031	7.33e-06	-0.0201	0.0177	0.2562	0.00129481	20.5247
Endometriosis	Coprococcus3	rs10810043	A	G	0.0515518	0.0115923	9.27e-06	0.02	0.0187	0.2839	0.00124751	19.7739
Endometriosis	Coprococcus3	rs11077359	T	C	-0.0645443	0.0148833	9.64e-06	0.0163	0.0237	0.4899	0.00122148	18.8044
Endometriosis	Coprococcus1	rs4277593	G	A	-0.0585649	0.0109914	1.14e-07	-0.0055	0.0179	0.760001	0.00170213	28.387
Endometriosis	Coprococcus1	rs74101919	T	C	-0.0718989	0.0144651	1.03e-06	0	0.0284	0.9998	0.00147439	24.7029
Endometriosis	Coprococcus1	rs56405618	A	G	-0.08963	0.0186508	1.57e-06	-0.0117	0.0277	0.6726	0.00140803	23.0918
Endometriosis	Coprococcus1	rs1010560	C	A	0.0580232	0.0122722	1.96e-06	0.003	0.0199	0.8792	0.00133496	22.3517
Endometriosis	Coprococcus1	rs73031725	T	C	0.167591	0.0355224	1.98e-06	0.0133	0.0505	0.792899	0.00307938	22.2524
Endometriosis	Coprococcus1	rs1576241	A	G	-0.0510343	0.0109535	3.33e-06	0.0281	0.0181	0.1205	0.00129595	21.7056
Endometriosis	Coprococcus1	rs12794898	G	T	0.0903299	0.0197212	4.92e-06	-0.0375	0.0265	0.1563	0.0013796	20.9767
Endometriosis	Coprococcus1	rs2907920	A	G	0.0561173	0.0126824	7.65e-06	0.0205	0.0195	0.2916	0.00121915	19.5766
Endometriosis	Coprococcus1	rs73167075	T	C	0.0573137	0.0127573	8.57e-06	0.0611	0.0215	0.00444304	0.00120476	20.1812
Endometriosis	Coprococcus1	rs946513	C	T	0.205899	0.0460018	8.62e-06	0.0062	0.043	0.8846	0.00462666	20.0243
Endometriosis	Coprococcus1	rs1519491	T	C	0.0499197	0.0113558	8.95e-06	-0.0184	0.018	0.3064	0.00115355	19.3223
Endometriosis	Eubacteriumxylanophilumgroup	rs17830032	G	A	-0.160597	0.0310515	2.39e-07	0.0224	0.0325	0.4902	0.00279988	26.7437
Endometriosis	Eubacteriumxylanophilumgroup	rs13239072	G	A	0.0687427	0.0142728	1.82e-06	0.0055	0.0197	0.7802	0.00174019	23.1936
Endometriosis	Eubacteriumxylanophilumgroup	rs112176119	C	T	-0.113455	0.0245762	3.33e-06	0.0011	0.0305	0.9714	0.00174397	21.3084
Endometriosis	Eubacteriumxylanophilumgroup	rs1999224	G	T	-0.0949051	0.0203503	3.75e-06	-0.0028	0.0295	0.9237	0.00163149	21.7457
Endometriosis	Eubacteriumxylanophilumgroup	rs2213117	T	G	0.0877797	0.0189012	4.21e-06	-0.0174	0.0241	0.471	0.00167199	21.5646
Endometriosis	Eubacteriumxylanophilumgroup	rs10140184	A	C	0.0576795	0.012599	4.96e-06	-0.0309	0.0179	0.0841105	0.00161834	20.9558
Endometriosis	Eubacteriumxylanophilumgroup	rs2012708	A	G	0.0573202	0.0126905	6.53e-06	-0.0178	0.0185	0.3361	0.0015309	20.3983
Endometriosis	Eubacteriumxylanophilumgroup	rs75586835	A	G	-0.114498	0.0263455	9.39e-06	0.059	0.0345	0.08689	0.00150274	18.8848
Endometriosis	Eubacteriumhalliigroup	rs13116360	T	C	0.154124	0.0297185	2.94e-07	-0.0041	0.0357	0.9078	0.00259868	26.8908
Endometriosis	Eubacteriumhalliigroup	rs10798999	C	T	0.0601661	0.0126752	2.61e-06	-0.0116	0.0199	0.5606	0.00135867	22.5288
Endometriosis	Eubacteriumhalliigroup	rs60254196	A	G	-0.0522832	0.0111865	2.7e-06	0.0124	0.0177	0.4842	0.00134344	21.8415
Endometriosis	Eubacteriumhalliigroup	rs949971	T	G	-0.0540164	0.0116101	3.29e-06	0.0139	0.0188	0.4583	0.00130496	21.6436
Endometriosis	Eubacteriumhalliigroup	rs74018587	C	T	0.208943	0.043822	3.7e-06	-0.0511	0.0446	0.2515	0.00742512	22.7188
Endometriosis	Eubacteriumhalliigroup	rs10808115	A	C	-0.0504747	0.0109922	4.42e-06	0.0195	0.0175	0.2659	0.00127117	21.0825
Endometriosis	Eubacteriumhalliigroup	rs28584818	A	G	0.126115	0.0268627	4.43e-06	0.0119	0.0328	0.716401	0.00198265	22.0372
Endometriosis	Eubacteriumhalliigroup	rs6550770	T	C	-0.198087	0.0443545	4.82e-06	-0.017	0.0445	0.702301	0.00463956	19.9359
Endometriosis	Eubacteriumhalliigroup	rs10501370	C	T	-0.115589	0.0252489	5.42e-06	-0.0064	0.0364	0.8611	0.00151376	20.9549
Endometriosis	Eubacteriumhalliigroup	rs117748144	T	C	-0.126582	0.028712	7.86e-06	-0.0053	0.0397	0.8945	0.00178637	19.4329
Endometriosis	Eubacteriumhalliigroup	rs78056098	G	T	-0.0507411	0.0113758	8.29e-06	-0.027	0.0183	0.1397	0.0011994	19.8931
Endometriosis	Eubacteriumhalliigroup	rs630939	C	T	-0.0508914	0.0114352	9.16e-06	0.0393	0.0177	0.0268201	0.00121826	19.8037
Endometriosis	Eubacteriumhalliigroup	rs281379	A	G	-0.0499523	0.0112153	9.33e-06	0.0332	0.0179	0.0637104	0.00122835	19.8352
Endometriosis	Eubacteriumhalliigroup	rs17074066	T	C	-0.0813986	0.0189272	9.35e-06	0.0044	0.0625	0.9433	0.00116892	18.4929
Endometriosis	Eubacteriumhalliigroup	rs17474256	G	A	0.0810805	0.0184573	9.45e-06	-0.0149	0.0295	0.612901	0.001171	19.2949
Endometriosis	Coprococcus2	rs6677933	C	T	-0.0804405	0.0164216	1.19e-06	-0.007	0.025	0.7798	0.00208524	23.9906
Endometriosis	Coprococcus2	rs72680320	T	C	-0.0649382	0.013919	2.27e-06	0.0095	0.0186	0.609399	0.00197324	21.7623
Endometriosis	Coprococcus2	rs2482516	C	T	0.0754415	0.0164619	4.72e-06	-0.0047	0.0212	0.8238	0.00182563	20.9984
Endometriosis	Coprococcus2	rs9426473	A	G	0.0727361	0.0161662	6.31e-06	-0.006	0.02	0.7625	0.00175935	20.24
Endometriosis	Coprococcus2	rs61823518	A	C	-0.0955381	0.0215724	6.68e-06	-0.0169	0.0287	0.5564	0.00178311	19.6099
Endometriosis	Coprococcus2	rs10070053	A	G	0.0594312	0.0135375	7.65e-06	0.0008	0.0178	0.9619	0.00167704	19.2697
Endometriosis	Coprococcus2	rs35890118	A	G	-0.066536	0.0147661	8.26e-06	-0.0011	0.0202	0.9582	0.00176583	20.3005
Endometriosis	Coprococcus2	rs12634070	T	C	0.0736486	0.0164921	9.95e-06	-0.0448	0.0202	0.0263998	0.0017376	19.9388
Endometriosis	Victivallis	rs56349194	A	G	-0.158501	0.0315231	6.26e-07	-0.0254	0.0262	0.3322	0.00768144	25.2663
Endometriosis	Victivallis	rs4764863	G	A	0.121561	0.0246058	8.22e-07	-0.0251	0.0177	0.1564	0.00741755	24.3918
Endometriosis	Victivallis	rs12512543	A	C	-0.178036	0.0374344	2.54e-06	-0.014	0.0314	0.6565	0.0069349	22.605
Endometriosis	Victivallis	rs4895919	T	C	-0.116918	0.0247515	2.75e-06	-0.0241	0.0175	0.1701	0.00681034	22.2991
Endometriosis	Victivallis	rs11899949	G	A	0.130568	0.0276239	2.77e-06	-0.0014	0.019	0.9416	0.00681057	22.3273
Endometriosis	Victivallis	rs173120	T	C	0.13381	0.0290127	7.65e-06	-0.0264	0.0224	0.2386	0.00647679	21.2585
Endometriosis	Victivallis	rs911666	T	C	-0.118576	0.0263146	7.65e-06	-0.0109	0.0191	0.5673	0.00617673	20.2924
Endometriosis	Victivallis	rs342302	A	G	-0.152754	0.0351572	8.16e-06	0.0401	0.0255	0.1159	0.0057487	18.8665
Endometriosis	Victivallis	rs1882775	A	G	-0.13827	0.031273	8.73e-06	-0.0282	0.0227	0.2148	0.00596445	19.5368
Endometriosis	Victivallis	rs2546432	T	C	-0.110803	0.0249655	9.93e-06	0.0092	0.0177	0.6038	0.0059951	19.686
Endometriosis	Veillonella	rs1882878	A	G	-0.0768966	0.0163908	2.98e-06	-0.0019	0.0192	0.9223	0.0023656	22.0049
Endometriosis	Veillonella	rs2013594	T	C	-0.0720698	0.0155153	3.42e-06	0.0082	0.018	0.6494	0.00231894	21.5721
Endometriosis	Veillonella	rs62376424	C	T	-0.0762216	0.0163499	3.65e-06	-0.0391	0.0191	0.0404297	0.00240926	21.7284
Endometriosis	Veillonella	rs742016	A	G	-0.0688571	0.0149769	4.66e-06	0.014	0.0185	0.4503	0.00227281	21.1329
Endometriosis	Veillonella	rs6656807	A	G	0.0703062	0.0153954	5.5e-06	0.0264	0.0182	0.1467	0.0023121	20.8502
Endometriosis	Veillonella	rs55807413	A	G	0.107329	0.0237633	5.51e-06	0.0114	0.0292	0.695401	0.00236369	20.3949
Endometriosis	Tyzzerella3	rs67476743	T	G	0.132164	0.022208	3.74e-09	0.0078	0.0199	0.6938	0.00710688	35.4022
Endometriosis	Tyzzerella3	rs17706273	T	C	-0.140368	0.0274708	5.88e-07	0.0181	0.0326	0.5781	0.00481624	26.0997
Endometriosis	Tyzzerella3	rs55799124	A	G	-0.11435	0.0238604	1.34e-06	-0.0171	0.0199	0.3897	0.00426515	22.9591
Endometriosis	Tyzzerella3	rs7561370	T	C	0.131341	0.0286292	1.52e-06	-0.0142	0.0246	0.5642	0.00388525	21.0388
Endometriosis	Tyzzerella3	rs75091807	G	T	-0.184966	0.0383029	1.71e-06	-0.0209	0.0365	0.566601	0.0050211	23.3095
Endometriosis	Tyzzerella3	rs7019909	T	C	0.144156	0.0301626	1.76e-06	0.0313	0.027	0.2471	0.00421519	22.833
Endometriosis	Tyzzerella3	rs4904512	T	C	-0.117151	0.0250306	3.09e-06	0.0047	0.0261	0.8564	0.00404314	21.8972
Endometriosis	Tyzzerella3	rs6920448	C	T	-0.141081	0.0305446	4.15e-06	0.0202	0.0302	0.504001	0.00424017	21.3252
Endometriosis	Tyzzerella3	rs7333521	T	C	-0.207191	0.0453121	4.88e-06	-0.0942	0.0495	0.0571202	0.00479996	20.8985
Endometriosis	Tyzzerella3	rs112102233	A	G	-0.216348	0.0477575	6.18e-06	0.094	0.0418	0.0246297	0.00529261	20.5116
Endometriosis	Tyzzerella3	rs191093	G	A	0.159008	0.0353306	6.76e-06	-0.0005	0.0285	0.9873	0.00436417	20.2465
Endometriosis	Tyzzerella3	rs1232220	G	T	-0.143869	0.031828	7.91e-06	-0.0281	0.0297	0.3444	0.00406982	20.4241
Endometriosis	Tyzzerella3	rs10898797	C	T	0.12238	0.0274683	8.85e-06	-0.0354	0.0281	0.2078	0.00367127	19.8426
Endometriosis	Turicibacter	rs149744580	A	G	0.169883	0.0315478	7.01e-08	0.0085	0.0391	0.8289	0.00341628	28.9905
Endometriosis	Turicibacter	rs11054680	T	C	-0.104751	0.0226998	2.31e-06	0.0171	0.0232	0.4625	0.00237951	21.2901
Endometriosis	Turicibacter	rs4869133	G	A	0.131186	0.027197	2.55e-06	0.0217	0.0231	0.3467	0.00281024	23.2611
Endometriosis	Turicibacter	rs55756211	T	C	-0.115115	0.0240708	2.81e-06	0.0023	0.0337	0.9447	0.00255147	22.8659
Endometriosis	Turicibacter	rs2834977	T	C	-0.0959995	0.0208261	3.96e-06	0.0258	0.0243	0.2884	0.00236953	21.2435
Endometriosis	Turicibacter	rs3734633	G	A	-0.120957	0.02683	5.32e-06	0.0427	0.0378	0.2581	0.00235064	20.3197
Endometriosis	Turicibacter	rs2952020	G	A	-0.0759019	0.0165764	5.63e-06	-0.0005	0.0205	0.9793	0.00233741	20.9618
Endometriosis	Turicibacter	rs7199484	G	A	-0.0731428	0.0160172	5.77e-06	0.005	0.019	0.7922	0.00232507	20.8485
Endometriosis	Turicibacter	rs11666533	C	T	-0.111689	0.0248436	7.37e-06	0.0011	0.0319	0.9727	0.00244208	20.2063
Endometriosis	Terrisporobacter	rs1883097	C	T	0.226399	0.0454642	4.16e-07	0.0101	0.0459	0.826	0.00558278	24.7864
Endometriosis	Terrisporobacter	rs2872237	C	A	-0.0814505	0.0175943	3.97e-06	0.0221	0.0179	0.2181	0.00322105	21.4246
Endometriosis	Terrisporobacter	rs58405430	G	T	0.134617	0.0301177	7.94e-06	-0.058	0.037	0.1168	0.00322438	19.9717
Endometriosis	Terrisporobacter	rs7184125	T	C	0.091256	0.0205493	8.48e-06	-0.0215	0.0198	0.2769	0.00315448	19.7146
Endometriosis	Terrisporobacter	rs2569953	A	C	-0.0775591	0.0174641	8.95e-06	0.0128	0.0178	0.4718	0.00296287	19.7171
Endometriosis	Sutterella	rs2321387	G	A	-0.0592876	0.0124509	1.87e-06	-0.0311	0.0178	0.0805008	0.00170805	22.6704
Endometriosis	Sutterella	rs7499539	A	G	0.0617478	0.0130998	2.36e-06	-0.0298	0.0199	0.1338	0.00167354	22.215
Endometriosis	Sutterella	rs13173038	A	G	-0.0718076	0.0151627	2.73e-06	-0.0033	0.0203	0.8694	0.00169044	22.4245
Endometriosis	Sutterella	rs143438747	T	C	-0.145793	0.0306867	3.28e-06	0.0377	0.0333	0.2569	0.00240369	22.5672
Endometriosis	Sutterella	rs62501473	G	A	0.0694233	0.0149416	5.52e-06	-0.0044	0.02	0.824	0.00168873	21.5846
Endometriosis	Sutterella	rs11591622	T	G	-0.0688382	0.0151375	6.5e-06	-0.0364	0.0239	0.127	0.00163806	20.6767
Endometriosis	Sutterella	rs607327	C	T	0.0578334	0.0129053	6.63e-06	-0.015	0.0181	0.4094	0.00151327	20.0797
Endometriosis	Sutterella	rs1145877	A	G	-0.073548	0.0162413	7.2e-06	0.0228	0.0254	0.3701	0.00154518	20.5037
Endometriosis	Sutterella	rs2613606	C	T	-0.0556794	0.0124117	7.2e-06	0.0013	0.0178	0.9422	0.00151663	20.1214
Endometriosis	Sutterella	rs2050185	G	A	0.0575138	0.0128766	7.97e-06	0.032	0.0181	0.0776801	0.00150418	19.9469
Endometriosis	Sutterella	rs9350083	T	G	-0.0593069	0.0133929	8.23e-06	0.0118	0.0183	0.5209	0.0014773	19.6062
Endometriosis	Sutterella	rs7638039	T	C	0.0645624	0.0143887	8.66e-06	-0.0106	0.0204	0.6028	0.0015188	20.1304
Endometriosis	Subdoligranulum	rs10065321	T	C	-0.0512828	0.0108105	2.1e-06	0.003	0.0178	0.8672	0.00127777	22.5009
Endometriosis	Subdoligranulum	rs4347804	A	G	0.166063	0.0357483	2.18e-06	-0.1068	0.0496	0.03145	0.00497953	21.5692
Endometriosis	Subdoligranulum	rs2114677	C	T	-0.104176	0.0230829	2.72e-06	0.0254	0.0274	0.3532	0.00130681	20.3658
Endometriosis	Subdoligranulum	rs6555306	T	C	-0.0740777	0.0155463	2.81e-06	0.0145	0.0249	0.561399	0.00128905	22.7024
Endometriosis	Subdoligranulum	rs3761728	T	G	-0.0543458	0.0118866	3.87e-06	0.0341	0.0203	0.0923698	0.0011883	20.901
Endometriosis	Subdoligranulum	rs35940633	G	A	-0.0511008	0.011001	4.22e-06	-0.0011	0.0187	0.9523	0.00122571	21.5745
Endometriosis	Subdoligranulum	rs2171249	C	T	0.106744	0.0233213	4.51e-06	0.0532	0.0343	0.1208	0.00142516	20.947
Endometriosis	Subdoligranulum	rs1667315	G	A	0.0485017	0.0107452	6.72e-06	0.0161	0.018	0.3694	0.00115722	20.3721
Endometriosis	Subdoligranulum	rs76528319	G	T	-0.143279	0.0310662	7.41e-06	0.0361	0.0318	0.2563	0.00250562	21.2659
Endometriosis	Subdoligranulum	rs75158211	T	C	-0.072343	0.015933	7.52e-06	0.0058	0.0247	0.8157	0.00119958	20.6132
Endometriosis	Subdoligranulum	rs10497836	C	T	-0.0524065	0.0118697	8.38e-06	0.006	0.0215	0.7788	0.00110768	19.4912
Endometriosis	Streptococcus	rs11110281	T	C	-0.137519	0.0227398	2.58e-09	-0.0279	0.0411	0.498101	0.00241296	36.5673
Endometriosis	Streptococcus	rs11764382	A	G	-0.0695345	0.0143671	1.29e-06	-0.1023	0.0253	5.319e-05	0.00142738	23.4211
Endometriosis	Streptococcus	rs1918540	G	A	0.059639	0.0128148	2.44e-06	0.0403	0.0227	0.0761202	0.0013211	21.6563
Endometriosis	Streptococcus	rs7916711	A	G	0.102891	0.0217362	2.72e-06	0.0165	0.0253	0.514801	0.00146295	22.4042
Endometriosis	Streptococcus	rs17708276	A	G	-0.0793955	0.0170628	3.04e-06	-0.0041	0.0298	0.8909	0.00132836	21.6491
Endometriosis	Streptococcus	rs10448310	A	G	-0.0517935	0.0111324	3.31e-06	0.0036	0.0183	0.8459	0.00131942	21.6433
Endometriosis	Streptococcus	rs11720390	G	A	0.107024	0.0228121	3.59e-06	0.0336	0.0362	0.3541	0.00144407	22.0076
Endometriosis	Streptococcus	rs6806351	T	C	-0.0633829	0.0136647	4.94e-06	0.0276	0.0212	0.1924	0.00134515	21.5123
Endometriosis	Streptococcus	rs57646748	G	A	-0.0907696	0.0200344	5.48e-06	0.0181	0.0451	0.6878	0.00128619	20.5245
Endometriosis	Streptococcus	rs71481756	T	G	0.0931048	0.0207949	6.51e-06	-0.0209	0.0361	0.562	0.00137811	20.0433
Endometriosis	Streptococcus	rs10028567	C	T	-0.0921167	0.0191881	7.3e-06	-0.0423	0.0268	0.1139	0.00141097	23.044
Endometriosis	Streptococcus	rs2370083	G	T	-0.0816836	0.0185851	9.75e-06	0.0285	0.0359	0.4263	0.00118536	19.3146
Endometriosis	Slackia	rs8901	C	T	0.0934594	0.0186813	6.07e-07	0.041	0.0192	0.0324399	0.00411107	25.0201
Endometriosis	Slackia	rs4492265	A	G	-0.0905757	0.0191658	2.41e-06	-0.0026	0.0192	0.8914	0.00367014	22.3267
Endometriosis	Slackia	rs12440440	A	G	0.0901934	0.0190582	2.63e-06	-0.0129	0.0185	0.4866	0.00368039	22.3893
Endometriosis	Slackia	rs16894137	C	T	-0.122792	0.0263047	2.71e-06	-0.0135	0.0261	0.6036	0.00358121	21.7837
Endometriosis	Slackia	rs10409783	A	G	0.0950828	0.0211239	7.7e-06	-0.0161	0.0196	0.4102	0.00339873	20.2539
Endometriosis	Slackia	rs35156985	T	C	-0.155709	0.0348085	8.06e-06	-0.0625	0.0438	0.1532	0.00334343	20.0037
Endometriosis	Senegalimassilia	rs11787826	C	A	0.081327	0.0171154	2.63e-06	-0.0048	0.0178	0.7894	0.00325077	22.572
Endometriosis	Senegalimassilia	rs7225245	G	A	0.079173	0.0170421	4.18e-06	-0.0089	0.0178	0.6155	0.00310786	21.5766
Endometriosis	Senegalimassilia	rs10036909	C	T	0.185519	0.0400881	8.05e-06	-0.0352	0.0447	0.4313	0.00426842	21.4079
Endometriosis	Senegalimassilia	rs1990708	A	C	-0.109619	0.0247785	8.91e-06	-0.0006	0.0324	0.9852	0.00281906	19.5659
Endometriosis	Senegalimassilia	rs2017373	C	T	0.0782258	0.0176841	9.5e-06	-0.0063	0.0183	0.7295	0.00281848	19.5618
Endometriosis	Sellimonas	rs2371572	A	C	0.127349	0.0250862	4.46e-07	0.0056	0.0177	0.753101	0.00810446	25.754
Endometriosis	Sellimonas	rs13417181	T	C	0.166509	0.0337521	7.62e-07	0.0228	0.0211	0.2803	0.00792405	24.3214
Endometriosis	Sellimonas	rs2016057	A	C	-0.125878	0.0256153	1.03e-06	0.0096	0.0179	0.5932	0.00759841	24.1336
Endometriosis	Sellimonas	rs56203279	T	C	-0.124045	0.0269115	3.72e-06	0.0058	0.0185	0.754699	0.00669122	21.2328
Endometriosis	Sellimonas	rs2187447	A	C	0.243457	0.0527695	3.98e-06	-0.0419	0.0368	0.2553	0.0069804	21.2712
Endometriosis	Sellimonas	rs4600608	A	G	-0.137152	0.0301702	4.95e-06	-0.0015	0.0216	0.9451	0.00663279	20.6522
Endometriosis	Sellimonas	rs553697	T	C	-0.153767	0.0339099	6.13e-06	0.0299	0.0226	0.1858	0.00670319	20.549
Endometriosis	Sellimonas	rs113379006	T	C	-0.162759	0.0357025	7.21e-06	0.0055	0.023	0.8096	0.00654603	20.769
Endometriosis	Sellimonas	rs41816	A	G	0.132201	0.0291087	8.39e-06	0.0201	0.0192	0.2943	0.00649729	20.6134
Endometriosis	Ruminococcus2	rs78120384	A	G	-0.192815	0.0392045	3.31e-07	-0.0629	0.0304	0.0388696	0.00396134	24.1807
Endometriosis	Ruminococcus2	rs7635831	G	A	0.0618344	0.0129031	1.98e-06	0.005	0.0183	0.7851	0.00153645	22.9622
Endometriosis	Ruminococcus2	rs12986628	C	T	0.0665937	0.0140168	2.14e-06	-0.0227	0.0222	0.3057	0.00153169	22.5688
Endometriosis	Ruminococcus2	rs2368224	T	G	0.199648	0.0438453	3.63e-06	0.0311	0.0408	0.4457	0.00680529	20.7202
Endometriosis	Ruminococcus2	rs75140805	T	G	0.0836825	0.0176445	3.95e-06	-0.012	0.0231	0.6046	0.00157609	22.49
Endometriosis	Ruminococcus2	rs58681734	A	G	0.0723875	0.0160787	4.18e-06	-0.0305	0.0215	0.1574	0.00131972	20.266
Endometriosis	Ruminococcus2	rs2997412	A	G	-0.0568439	0.0122325	4.22e-06	0.0281	0.0197	0.1533	0.0014061	21.5915
Endometriosis	Ruminococcus2	rs1819812	G	T	0.0842356	0.0184893	5.28e-06	0.008	0.04	0.8422	0.00139409	20.7535
[truncated: 979 more rows]

## Sheet: Supplementary Table 2C
Supplementary Table 2C. MR analysis of all gut microbiome in endometriosis(P<1e-5)
[truncated: 478 more rows]

## Sheet: Supplementary Table 3
Supplementary Table 3. P value of IVW analysis after FDR correction (P<1e-5)
[truncated: 359 more rows]

[truncated: 4 more sheets: Supplementary Table 4A, Supplementary Table 4B, Supplementary Table 5A, Supplementary Table 5B]
